# Supplementary material for: CHD-associated enhancers shape human cardiomyocyte lineage commitment
Source: eLife. 2023 Apr 25;12:e86206. doi: 10.7554/eLife.86206 (PMC10156167; doi:10.7554/eLife.86206)
Supplement: Supplementary file 1. [file elife-86206-supp1.xlsx]

## Sheet: Enhancer_Variants
enhancer_chr	enhancer_start	enhancer_end	enhancer	variant_chr	variant_start	variant_end	original	variant	patient	phenotype	source
chr8	11599953	11600453	GATA4_Enh1	chr8	11600172	11600173	C	A	1-07589	ATRIAL SEPTAL DEFECT, SECUNDUM; COARCTATION; VENTRICULAR SEPTAL DEFECT, MEMBRANOUS; VENTRICULAR SEPTAL DEFECT, MULTIPLE; VENTRICULAR SEPTAL DEFECT, MUSCULAR	Richter et al., 2020
chr2	121523411	121523911	GLI2_Enh1	chr2	121523407	121523408	C	T	1-05365	ABDOMINAL HETEROTAXY (SITUS AMBIGUOUS); ALL; ANATOMIC OR FUNCTIONAL ASPLENIA; ASPLENIA SYNDROME (RIGHT ISOMERISM); BALANCED COMPLETE ATRIOVENTRICULAR CANAL; COMMON ATRIUM; DEXTROCARDIA; DOUBLE OUTLET RIGHT VENTRICLE; HETEROTAXY; L-LOOP TRANSPOSITION OF THE GREAT VESSELS; LEFT SUPERIOR VENA CAVA ENTERING LEFT ATRIUM; LSVC - NON COMMUNICATING WITH RSVC; PULMONARY STENOSIS, SUBVALVAR; PULMONARY STEN…	Richter et al., 2020
chr5	1841140	1841640	IRX4_Enh1	chr5	1841284	1841285	T	C	1-04466	TETRALOGY OF FALLOT	Richter et al., 2020
chr2	66666416	66666916	MEIS1_Enh1	chr2	66666710	66666711	T	C	1-04865	TRANSPOSITION D-LOOP	Richter et al., 2020
chr2	66708189	66708689	MEIS1_Enh2	chr2	66708725	66708726	T	C	1-04826	LEFT AORTIC ARCH WITH NORMAL BRANCHING PATTERN; TRUNCUS ARTERIOSUS TYPE I (MAIN PULMONARY ARTERY PRESENT); VENTRICULAR SEPTAL DEFECT, MALALIGNMENT	Richter et al., 2020
chr5	174119973	174120473	MSX2_Enh1	chr5	174119743	174119744	G	A	1-07187	AORTIC STENOSIS - SUBVALVAR; DOUBLE OUTLET RIGHT VENTRICLE; PATENT DUCTUS ARTERIOSUS; PATENT FORAMEN OVALE	Richter et al., 2020
chr8	23584029	23584529	NKX2-6_Enh1	chr8	23583920	23583921	T	A	1-06503	ACYANOTIC CONGENITAL HEART DISEASE; AORTIC REGURGITATION; AORTIC STENOSIS - VALVAR; BICOMMISSURAL (BICUSPID, BILEAFLET) AORTIC VALVE, RIGHT-LEFT FUSION	Richter et al., 2020
chr10	112389341	112389841	RBM20_Enh1	chr10	112389869	112389870	A	T	1-05119	TRANSPOSITION D-LOOP	Richter et al., 2020
chr9	137198427	137198927	RXRA_Enh1	chr9	137198760	137198761	C	T	1-01577	CLEFT MITRAL VALVE; ENDOCARDIAL CUSHION DEFECT; OSTIUM PRIMUM ATRIAL SEPTAL DEFECT	Richter et al., 2020
chr15	66914179	66914679	SMAD6_Enh1	chr15	66913870	66913871	GA	G	1-06105	LEFT PULMONARY ARTERY ABNORMALITY; TETRALOGY OF FALLOT	Richter et al., 2020
chr15	66913553	66914053	SMAD6_Enh2	chr15	66913870	66913871	GA	G	1-06105	LEFT PULMONARY ARTERY ABNORMALITY; TETRALOGY OF FALLOT	Richter et al., 2020
chr19	41933088	41933587	TGFB1_Enh1	chr19	41934150	41934151	G	A	1-01984	HYPOPLASTIC LEFT HEART SYNDROME	Richter et al., 2020
chr1	201395494	201395994	TNNT2_Enh2	chr1	201395787	201395788	G	A	1-05223	ATYPICAL CLEFT OF MITRAL VALVE; PARACHUTE MITRAL VALVE; RIGHT AORTIC ARCH WITH NORMAL BRANCHING PATTERN; TETRALOGY OF FALLOT WITH PULMONARY ATRESIA AND MAPCAS	Richter et al., 2020
chr1	201438155	201438655	TNNT2_Enh3	chr1	201438231	201438232	C	A	1-05398	ATRIAL SEPTAL DEFECT; INTERRUPTED AORTIC ARCH + AP WINDOW (AORTOPULMONARY WINDOW)	Richter et al., 2020
chr12	114370998	114371498	TBX5|ENST00000405440.6|-
chr12	114773356	114773856	TBX5|ENST00000405440.6|-
chr12	114799359	114799859	TBX5|ENST00000405440.6|-
chr12	114463712	114464080	TBX5_Cardio_Smemo_Enh2
chr12	114701207	114704691	TBX5_Cardio_Smemo_Enh9	chr12	114704514	114704515	G	T		ventricular septal defects	Smemo et al., 2012
chr12	114853271	114858238	TBX5_Cardio_Smemo_Enh16
chr15	90734563	90735564	1-08416:chr15:90191832:G:A	chr15	90735064	90735065	G	A	1-08416	COARCTATION; LEFT AORTIC ARCH WITH NORMAL BRANCHING PATTERN; VENTRICULAR SEPTAL DEFECT, MEMBRANOUS; VENTRICULAR SEPTAL DEFECT, MUSCULAR; VENTRICULAR SEPTAL DEFECT, SINGLE	Richter et al., 2020
chr16	57302396	57303397	1-06412:chr16:57268985:C:T	chr16	57302898	57302898	C	T	1-06412	ATRIAL SEPTAL DEFECT, SECUNDUM; TRICUSPID ATRESIA + NO PULMONARY STENOSIS AND LARGE VSD (IC)	Richter et al., 2020
chr20	1305543	1306544	1-07009:chr20:1325400:C:T	chr20	1306044	1306045	C	T	1-07009	AORTIC ARCH HYPOPLASIA; AORTIC STENOSIS - SUBVALVAR; AORTIC STENOSIS - VALVAR; ATRIAL SEPTAL DEFECT, SECUNDUM; BICOMMISSURAL (BICUSPID, BILEAFLET, BIFOLIATE) AORTIC VALVE; BICUSPID PULMONARY VALVE; COARCTATION; CONGENITAL CORONARY ANOMALY; LEFT AORTIC ARCH WITH NORMAL BRANCHING PATTERN; LSVC - NON COMMUNICATING WITH RSVC; LSVC TO CORONARY SINUS; MITRAL VALVE ABNORMALITY; RIGHT SUPERIOR VENA CAVA …	Richter et al., 2020
chr20	42779999	42781000	1-13185:chr20:44151860:A:G	chr20	42780500	42780501	A	G	1-13185	INTACT ATRIAL SEPTUM; LEFT AORTIC ARCH WITH NORMAL BRANCHING PATTERN; PARTIALLY ANOMALOUS PULMONARY VEINS; VENTRICULAR SEPTAL DEFECT, MUSCULAR	Richter et al., 2020
chr7	4835470	4836471	1-00046:chr7:4796340:C:T	chr7	4835971	4835972	C	T	1-00046	HYPOPLASTIC PULMONARY ANNULUS; PULMONARY STENOSIS, SUBVALVAR; RIGHT AORTIC ARCH; TRANSPOSITION D-LOOP WITH VENTRICULAR SEPTAL DEFECT; VENTRICULAR SEPTAL DEFECT, MALALIGNMENT	Richter et al., 2020

## Sheet: sgRNA_List
Target	sgName	seq	oligo	position(hg19)
NC_Blank	NC_Blank	GAGACGGGATACCGTCTCT
MALAT1	MALAT1	GCGCTGCGCTTAAGAGGGC	GTGGAAAGGACGAAACACCGGCGCTGCGCTTAAGAGGGCGTTTTAGAGCTAGGCCAACATGAGGATCAC	chr11:65265266-65265285
NT:1	NC:1	GTTCCGCGTTACATAACTTA	GTGGAAAGGACGAAACACCGGTTCCGCGTTACATAACTTAGTTTTAGAGCTAGGCCAACATGAGGATCAC	na
NC:2	NC:2	TGTGAGTTAGCTCACTCATT	GTGGAAAGGACGAAACACCGTGTGAGTTAGCTCACTCATTGTTTTAGAGCTAGGCCAACATGAGGATCAC	na
NC:3	NC:3	GGAGCGCACCATCTTCTTCA	GTGGAAAGGACGAAACACCGGGAGCGCACCATCTTCTTCAGTTTTAGAGCTAGGCCAACATGAGGATCAC	na
NC:4	NC:4	GTGAACCGCATCGAGCTGAA	GTGGAAAGGACGAAACACCGGTGAACCGCATCGAGCTGAAGTTTTAGAGCTAGGCCAACATGAGGATCAC	na
NC:5	NC:5	GTCCAAGCATGAGCAGTTC	GTGGAAAGGACGAAACACCGGTCCAAGCATGAGCAGTTCGTTTTAGAGCTAGGCCAACATGAGGATCAC	na
TBXEnh1	TBXEnh1:1	GCTCCCAAGGAAGAAGAGT	GTGGAAAGGACGAAACACCGGCTCCCAAGGAAGAAGAGTGTTTTAGAGCTAGGCCAACATGAGGATCAC	chr12:114853293-114853312
TBXEnh1	TBXEnh1:2	GAGGACAACGAGGGCTGGG	GTGGAAAGGACGAAACACCGGAGGACAACGAGGGCTGGGGTTTTAGAGCTAGGCCAACATGAGGATCAC	chr12:114853441-114853460
TBXEnh1	TBXEnh1:3	AGAACAGCACCCGCCAGGA	GTGGAAAGGACGAAACACCGAGAACAGCACCCGCCAGGAGTTTTAGAGCTAGGCCAACATGAGGATCAC	chr12:114853548-114853567
TBXEnh1	TBXEnh1:4	TGGGAATTCACCGATGACG	GTGGAAAGGACGAAACACCGTGGGAATTCACCGATGACGGTTTTAGAGCTAGGCCAACATGAGGATCAC	chr12:114853650-114853669
TBXEnh1	TBXEnh1:5	ACAGACACGCACAACTTCC	GTGGAAAGGACGAAACACCGACAGACACGCACAACTTCCGTTTTAGAGCTAGGCCAACATGAGGATCAC	chr12:114853773-114853792
TBXEnh1	TBXEnh1:6	GCCTTAGAGCCCGGCCGCT	GTGGAAAGGACGAAACACCGGCCTTAGAGCCCGGCCGCTGTTTTAGAGCTAGGCCAACATGAGGATCAC	chr12:114853932-114853951
TBXEnh1	TBXEnh1:7	AACAGCCCCTACCTCCCAG	GTGGAAAGGACGAAACACCGAACAGCCCCTACCTCCCAGGTTTTAGAGCTAGGCCAACATGAGGATCAC	chr12:114854055-114854074
TBXEnh1	TBXEnh1:8	GCAGGGGGACCCGCGGGCA	GTGGAAAGGACGAAACACCGGCAGGGGGACCCGCGGGCAGTTTTAGAGCTAGGCCAACATGAGGATCAC	chr12:114854241-114854260
TBXEnh2	TBXEnh2:1	GAAAATCAAATTCACAGGC	GTGGAAAGGACGAAACACCGGAAAATCAAATTCACAGGCGTTTTAGAGCTAGGCCAACATGAGGATCAC	chr15:90734612-90734631
TBXEnh2	TBXEnh2:2	TTAAAGAGACACGACTGGC	GTGGAAAGGACGAAACACCGTTAAAGAGACACGACTGGCGTTTTAGAGCTAGGCCAACATGAGGATCAC	chr15:90734745-90734764
TBXEnh2	TBXEnh2:3	ACAACAGGCCGATAGTGTC	GTGGAAAGGACGAAACACCGACAACAGGCCGATAGTGTCGTTTTAGAGCTAGGCCAACATGAGGATCAC	chr15:90734910-90734929
TBXEnh2	TBXEnh2:4	GCCTGACCTGGAGATGCTG	GTGGAAAGGACGAAACACCGGCCTGACCTGGAGATGCTGGTTTTAGAGCTAGGCCAACATGAGGATCAC	chr15:90735035-90735054
TBXEnh2	TBXEnh2:5	AAGGCGTCCCTGCTCTTTG	GTGGAAAGGACGAAACACCGAAGGCGTCCCTGCTCTTTGGTTTTAGAGCTAGGCCAACATGAGGATCAC	chr15:90735105-90735124
TBXEnh2	TBXEnh2:6	TCAGGGTTGAGCTAAAAAC	GTGGAAAGGACGAAACACCGTCAGGGTTGAGCTAAAAACGTTTTAGAGCTAGGCCAACATGAGGATCAC	chr15:90735261-90735280
TBXEnh2	TBXEnh2:7	GACAAGTTGCAGTTTCAAG	GTGGAAAGGACGAAACACCGGACAAGTTGCAGTTTCAAGGTTTTAGAGCTAGGCCAACATGAGGATCAC	chr15:90735368-90735387
TBXEnh2	TBXEnh2:8	GCTCACTCTCTCTATCTTG	GTGGAAAGGACGAAACACCGGCTCACTCTCTCTATCTTGGTTTTAGAGCTAGGCCAACATGAGGATCAC	chr15:90735497-90735516
TBXEnh3	TBXEnh3:1	ACAGCCGGTTCCAAACACA	GTGGAAAGGACGAAACACCGACAGCCGGTTCCAAACACAGTTTTAGAGCTAGGCCAACATGAGGATCAC	chr16:57302650-57302669
TBXEnh3	TBXEnh3:2	AAATGTCACAGGGCCAGGC	GTGGAAAGGACGAAACACCGAAATGTCACAGGGCCAGGCGTTTTAGAGCTAGGCCAACATGAGGATCAC	chr16:57302774-57302793
TBXEnh3	TBXEnh3:3	GGAAGTCAGATAGTGGGGC	GTGGAAAGGACGAAACACCGGGAAGTCAGATAGTGGGGCGTTTTAGAGCTAGGCCAACATGAGGATCAC	chr16:57302854-57302873
TBXEnh3	TBXEnh3:4	CATTAAGTGATAACTCCAT	GTGGAAAGGACGAAACACCGCATTAAGTGATAACTCCATGTTTTAGAGCTAGGCCAACATGAGGATCAC	chr16:57302927-57302946
TBXEnh3	TBXEnh3:5	GCCGAGGTTTCCTTCCAGT	GTGGAAAGGACGAAACACCGGCCGAGGTTTCCTTCCAGTGTTTTAGAGCTAGGCCAACATGAGGATCAC	chr16:57303045-57303064
TBXEnh3	TBXEnh3:6	ACAGGGAACATTCCAACCG	GTGGAAAGGACGAAACACCGACAGGGAACATTCCAACCGGTTTTAGAGCTAGGCCAACATGAGGATCAC	chr16:57303141-57303160
TBXEnh3	TBXEnh3:7	GTGAATGGGGTATGCACCC	GTGGAAAGGACGAAACACCGGTGAATGGGGTATGCACCCGTTTTAGAGCTAGGCCAACATGAGGATCAC	chr16:57303217-57303236
TBXEnh3	TBXEnh3:8	GATTTGGAAACCAACACTG	GTGGAAAGGACGAAACACCGGATTTGGAAACCAACACTGGTTTTAGAGCTAGGCCAACATGAGGATCAC	chr16:57303266-57303285
TBXEnh4	TBXEnh4:1	TCAAGCAGATGTCATCTTG	GTGGAAAGGACGAAACACCGTCAAGCAGATGTCATCTTGGTTTTAGAGCTAGGCCAACATGAGGATCAC	chr20:1305690-1305709
TBXEnh4	TBXEnh4:2	AGATGTAAGTCATTCACCA	GTGGAAAGGACGAAACACCGAGATGTAAGTCATTCACCAGTTTTAGAGCTAGGCCAACATGAGGATCAC	chr20:1305786-1305805
TBXEnh4	TBXEnh4:3	AGGAGGTACTGGGTAGAGC	GTGGAAAGGACGAAACACCGAGGAGGTACTGGGTAGAGCGTTTTAGAGCTAGGCCAACATGAGGATCAC	chr20:1305890-1305909
TBXEnh4	TBXEnh4:4	AACGCTGTCTTACAAACCC	GTGGAAAGGACGAAACACCGAACGCTGTCTTACAAACCCGTTTTAGAGCTAGGCCAACATGAGGATCAC	chr20:1305958-1305977
TBXEnh4	TBXEnh4:5	TGGCATTTGTCAAAGGAAG	GTGGAAAGGACGAAACACCGTGGCATTTGTCAAAGGAAGGTTTTAGAGCTAGGCCAACATGAGGATCAC	chr20:1305998-1306017
TBXEnh4	TBXEnh4:6	AGCAGTGTCCACTTTGGGA	GTGGAAAGGACGAAACACCGAGCAGTGTCCACTTTGGGAGTTTTAGAGCTAGGCCAACATGAGGATCAC	chr20:1306049-1306068
TBXEnh4	TBXEnh4:7	TCAGGCCCAGCCTTCGGGG	GTGGAAAGGACGAAACACCGTCAGGCCCAGCCTTCGGGGGTTTTAGAGCTAGGCCAACATGAGGATCAC	chr20:1306217-1306236
TBXEnh4	TBXEnh4:8	GAGGCAGCACTGCTACAGG	GTGGAAAGGACGAAACACCGGAGGCAGCACTGCTACAGGGTTTTAGAGCTAGGCCAACATGAGGATCAC	chr20:1306398-1306417
TBXEnh5	TBXEnh5:1	GTTGCCAACATTACAGGGA	GTGGAAAGGACGAAACACCGGTTGCCAACATTACAGGGAGTTTTAGAGCTAGGCCAACATGAGGATCAC	chr20:42780215-42780234
TBXEnh5	TBXEnh5:2	TTAGACACACTATAGCTCT	GTGGAAAGGACGAAACACCGTTAGACACACTATAGCTCTGTTTTAGAGCTAGGCCAACATGAGGATCAC	chr20:42780294-42780313
TBXEnh5	TBXEnh5:3	CTATAATTACCGTCATCTT	GTGGAAAGGACGAAACACCGCTATAATTACCGTCATCTTGTTTTAGAGCTAGGCCAACATGAGGATCAC	chr20:42780349-42780368
TBXEnh5	TBXEnh5:4	GTTTGACAAGATACCTGTG	GTGGAAAGGACGAAACACCGGTTTGACAAGATACCTGTGGTTTTAGAGCTAGGCCAACATGAGGATCAC	chr20:42780382-42780401
TBXEnh5	TBXEnh5:5	TATACCCCCATCTCATGTC	GTGGAAAGGACGAAACACCGTATACCCCCATCTCATGTCGTTTTAGAGCTAGGCCAACATGAGGATCAC	chr20:42780484-42780503
TBXEnh5	TBXEnh5:6	CTGGGCTTTGACATACACT	GTGGAAAGGACGAAACACCGCTGGGCTTTGACATACACTGTTTTAGAGCTAGGCCAACATGAGGATCAC	chr20:42780604-42780623
TBXEnh5	TBXEnh5:7	CTCTCTCAAGTTCCGAGGT	GTGGAAAGGACGAAACACCGCTCTCTCAAGTTCCGAGGTGTTTTAGAGCTAGGCCAACATGAGGATCAC	chr20:42780751-42780770
TBXEnh5	TBXEnh5:8	ACTGGGGAAATCCTTATCA	GTGGAAAGGACGAAACACCGACTGGGGAAATCCTTATCAGTTTTAGAGCTAGGCCAACATGAGGATCAC	chr20:42780832-42780851
TBXEnh6	TBXEnh6:1	TGCCCCCCCCTCCTTTTAT	GTGGAAAGGACGAAACACCGTGCCCCCCCCTCCTTTTATGTTTTAGAGCTAGGCCAACATGAGGATCAC	chr7:4835895-4835914
TBXEnh6	TBXEnh6:2	ATATAGACTCGGGTGGCCC	GTGGAAAGGACGAAACACCGATATAGACTCGGGTGGCCCGTTTTAGAGCTAGGCCAACATGAGGATCAC	chr7:4835941-4835960
TBXEnh6	TBXEnh6:3	CCCTGTCCCCGAGCACGCA	GTGGAAAGGACGAAACACCGCCCTGTCCCCGAGCACGCAGTTTTAGAGCTAGGCCAACATGAGGATCAC	chr7:4835985-4836004
TBXEnh6	TBXEnh6:4	TGCCTCCAATACTGCAAAG	GTGGAAAGGACGAAACACCGTGCCTCCAATACTGCAAAGGTTTTAGAGCTAGGCCAACATGAGGATCAC	chr7:4836015-4836034
TBXEnh6	TBXEnh6:5	TCCCCGGGCACACACCTCC	GTGGAAAGGACGAAACACCGTCCCCGGGCACACACCTCCGTTTTAGAGCTAGGCCAACATGAGGATCAC	chr7:4836046-4836065
TBXEnh6	TBXEnh6:6	CTGTGAACCCTCGGGGACA	GTGGAAAGGACGAAACACCGCTGTGAACCCTCGGGGACAGTTTTAGAGCTAGGCCAACATGAGGATCAC	chr7:4836174-4836193
TBXEnh6	TBXEnh6:7	CCTAGGCTAGGTAAAGACC	GTGGAAAGGACGAAACACCGCCTAGGCTAGGTAAAGACCGTTTTAGAGCTAGGCCAACATGAGGATCAC	chr7:4836229-4836248
TBXEnh6	TBXEnh6:8	ATCTCACTGCTTGACCCCT	GTGGAAAGGACGAAACACCGATCTCACTGCTTGACCCCTGTTTTAGAGCTAGGCCAACATGAGGATCAC	chr7:4836300-4836319
TBX5_AS1_P1	TBX5_AS1_P1:1	AATAAAGACATAAACCAACC	GTGGAAAGGACGAAACACCGAATAAAGACATAAACCAACCGTTTTAGAGCTAGGCCAACATGAGGATCAC	chr12:114845771-114845791
TBX5_AS1_P1	TBX5_AS1_P1:2	GATCGACTTTCTTAGGAAGG	GTGGAAAGGACGAAACACCGGATCGACTTTCTTAGGAAGGGTTTTAGAGCTAGGCCAACATGAGGATCAC	chr12:114845602-114845622
TBX5_AS1_P1	TBX5_AS1_P1:3	AGGAAATCGAGTTGTTCCGG	GTGGAAAGGACGAAACACCGAGGAAATCGAGTTGTTCCGGGTTTTAGAGCTAGGCCAACATGAGGATCAC	chr12:114845631-114845651
TBX5_AS1_P1	TBX5_AS1_P1:4	TATTATTTTTAAATCCCCCG	GTGGAAAGGACGAAACACCGTATTATTTTTAAATCCCCCGGTTTTAGAGCTAGGCCAACATGAGGATCAC	chr12:114845745-114845765
TBX5_AS1_P1	TBX5_AS1_P1:5	GTTCTCCGTAATGTGCCTTG	GTGGAAAGGACGAAACACCGGTTCTCCGTAATGTGCCTTGGTTTTAGAGCTAGGCCAACATGAGGATCAC	chr12:114845390-114845410
TBX5_AS1_P2	TBX5_AS1_P2:1	TATTGTACCAGGGCCCGCCG	GTGGAAAGGACGAAACACCGTATTGTACCAGGGCCCGCCGGTTTTAGAGCTAGGCCAACATGAGGATCAC	chr12:114843931-114843951
TBX5_AS1_P2	TBX5_AS1_P2:2	ACAATTTCTAAGCAGCGCAG	GTGGAAAGGACGAAACACCGACAATTTCTAAGCAGCGCAGGTTTTAGAGCTAGGCCAACATGAGGATCAC	chr12:114843472-114843492
TBX5_AS1_P2	TBX5_AS1_P2:3	TACCGCGTAGACGCCCCTGG	GTGGAAAGGACGAAACACCGTACCGCGTAGACGCCCCTGGGTTTTAGAGCTAGGCCAACATGAGGATCAC	chr12:114843540-114843560
TBX5_AS1_P2	TBX5_AS1_P2:4	GAATCGAACCCCGAAGCTGG	GTGGAAAGGACGAAACACCGGAATCGAACCCCGAAGCTGGGTTTTAGAGCTAGGCCAACATGAGGATCAC	chr12:114843449-114843469
TBX5_AS1_P2	TBX5_AS1_P2:5	GAGCCAAGGTCAGGCCCGCG	GTGGAAAGGACGAAACACCGGAGCCAAGGTCAGGCCCGCGGTTTTAGAGCTAGGCCAACATGAGGATCAC	chr12:114843585-114843605
TBX5_P1	TBX5_P1:1	CAAACCAACCTTGAGCTGGG	GTGGAAAGGACGAAACACCGCAAACCAACCTTGAGCTGGGGTTTTAGAGCTAGGCCAACATGAGGATCAC	chr12:114846047-114846067
TBX5_P1	TBX5_P1:2	GGAGGTGAGTTTCACCCTGG	GTGGAAAGGACGAAACACCGGGAGGTGAGTTTCACCCTGGGTTTTAGAGCTAGGCCAACATGAGGATCAC	chr12:114846120-114846140
TBX5_P1	TBX5_P1:3	TTGCGCTCCAAAGAAGAGGT	GTGGAAAGGACGAAACACCGTTGCGCTCCAAAGAAGAGGTGTTTTAGAGCTAGGCCAACATGAGGATCAC	chr12:114846199-114846219
TBX5_P1	TBX5_P1:4	GTGCTCTTCTTGACAGACGT	GTGGAAAGGACGAAACACCGGTGCTCTTCTTGACAGACGTGTTTTAGAGCTAGGCCAACATGAGGATCAC	chr12:114846266-114846286
TBX5_P1	TBX5_P1:5	TCATTGAGCACAGATGGTCT	GTGGAAAGGACGAAACACCGTCATTGAGCACAGATGGTCTGTTTTAGAGCTAGGCCAACATGAGGATCAC	chr12:114846424-114846444
TBX5_P2	TBX5_P2:1	TCAGTACTTTGTGAGCATCG	GTGGAAAGGACGAAACACCGTCAGTACTTTGTGAGCATCGGTTTTAGAGCTAGGCCAACATGAGGATCAC	chr12:114846560-114846580
TBX5_P2	TBX5_P2:2	GCTCCTAGCAGGGAAGCCGG	GTGGAAAGGACGAAACACCGGCTCCTAGCAGGGAAGCCGGGTTTTAGAGCTAGGCCAACATGAGGATCAC	chr12:114846646-114846666
TBX5_P2	TBX5_P2:3	TTACTGCTTACCCAGAATAG	GTGGAAAGGACGAAACACCGTTACTGCTTACCCAGAATAGGTTTTAGAGCTAGGCCAACATGAGGATCAC	chr12:114846727-114846747
TBX5_P2	TBX5_P2:4	AGAGGATGTGGTGAATGCAC	GTGGAAAGGACGAAACACCGAGAGGATGTGGTGAATGCACGTTTTAGAGCTAGGCCAACATGAGGATCAC	chr12:114846869-114846889
TBX5_P2	TBX5_P2:5	ACCTACCGCTGGAGCCTCCG	GTGGAAAGGACGAAACACCGACCTACCGCTGGAGCCTCCGGTTTTAGAGCTAGGCCAACATGAGGATCAC	chr12:114847015-114847035
NGFRAP1	NGFRAP1:1	AGGAATTCAGGGGCTACGT	GTGGAAAGGACGAAACACCGAGGAATTCAGGGGCTACGTGTTTTAGAGCTAGGCCAACATGAGGATCAC	chrX:102631010-102631029
NGFRAP1	NGFRAP1:2	GCCAAGGCCTGAAGTGAGA	GTGGAAAGGACGAAACACCGGCCAAGGCCTGAAGTGAGAGTTTTAGAGCTAGGCCAACATGAGGATCAC	chrX:102631126-102631146
NGFRAP1	NGFRAP1:3	GTTGGAGTTTGCCCTCCTC	GTGGAAAGGACGAAACACCGGTTGGAGTTTGCCCTCCTCGTTTTAGAGCTAGGCCAACATGAGGATCAC	chrX:102631188-102631207
NGFRAP1	NGFRAP1:4	AGGACCGAGAAGAGTGACA	GTGGAAAGGACGAAACACCGAGGACCGAGAAGAGTGACAGTTTTAGAGCTAGGCCAACATGAGGATCAC	chrX:102631247-102631266
CHDEnh1	CHDEnh1:1	TTCAGAGTTGTTGACGCCA	GTGGAAAGGACGAAACACCGTTCAGAGTTGTTGACGCCAGTTTTAGAGCTAGGCCAACATGAGGATCAC	chr12:114371023-114371042
CHDEnh1	CHDEnh1:2	ATGAACAGCACTTCATGGG	GTGGAAAGGACGAAACACCGATGAACAGCACTTCATGGGGTTTTAGAGCTAGGCCAACATGAGGATCAC	chr12:114371080-114371099
CHDEnh1	CHDEnh1:3	AAACAAGAGGCCGGTAGCG	GTGGAAAGGACGAAACACCGAAACAAGAGGCCGGTAGCGGTTTTAGAGCTAGGCCAACATGAGGATCAC	chr12:114371179-114371198
CHDEnh1	CHDEnh1:4	AGCAGAGGGCATCCACCCC	GTGGAAAGGACGAAACACCGAGCAGAGGGCATCCACCCCGTTTTAGAGCTAGGCCAACATGAGGATCAC	chr12:114371257-114371276
CHDEnh1	CHDEnh1:5	ATTCTTTCAAATCAGCCAA	GTGGAAAGGACGAAACACCGATTCTTTCAAATCAGCCAAGTTTTAGAGCTAGGCCAACATGAGGATCAC	chr12:114371303-114371322
CHDEnh1	CHDEnh1:6	GGCATAAGAGGAGAGCTCA	GTGGAAAGGACGAAACACCGGGCATAAGAGGAGAGCTCAGTTTTAGAGCTAGGCCAACATGAGGATCAC	chr12:114371339-114371358
CHDEnh1	CHDEnh1:7	TTCTCGGGTGCTGACTGGC	GTGGAAAGGACGAAACACCGTTCTCGGGTGCTGACTGGCGTTTTAGAGCTAGGCCAACATGAGGATCAC	chr12:114371401-114371420
CHDEnh1	CHDEnh1:8	AACTCCCAGAGTAGAACTG	GTGGAAAGGACGAAACACCGAACTCCCAGAGTAGAACTGGTTTTAGAGCTAGGCCAACATGAGGATCAC	chr12:114371456-114371475
CHDEnh2	CHDEnh2:1	CAAAACTACCCTAGGGCCC	GTGGAAAGGACGAAACACCGCAAAACTACCCTAGGGCCCGTTTTAGAGCTAGGCCAACATGAGGATCAC	chr12:114463741-114463760
CHDEnh2	CHDEnh2:2	AATGCAGGAAAGTAGGCCC	GTGGAAAGGACGAAACACCGAATGCAGGAAAGTAGGCCCGTTTTAGAGCTAGGCCAACATGAGGATCAC	chr12:114463774-114463793
CHDEnh2	CHDEnh2:3	TGTGCCTGGTGCTTGAATG	GTGGAAAGGACGAAACACCGTGTGCCTGGTGCTTGAATGGTTTTAGAGCTAGGCCAACATGAGGATCAC	chr12:114463805-114463824
CHDEnh2	CHDEnh2:4	AAGGCGGTGGTGCTCCCAC	GTGGAAAGGACGAAACACCGAAGGCGGTGGTGCTCCCACGTTTTAGAGCTAGGCCAACATGAGGATCAC	chr12:114463842-114463861
CHDEnh2	CHDEnh2:5	CCCTGGCACAATGGAAGCA	GTGGAAAGGACGAAACACCGCCCTGGCACAATGGAAGCAGTTTTAGAGCTAGGCCAACATGAGGATCAC	chr12:114463874-114463893
CHDEnh2	CHDEnh2:6	GGTCAAACCCCTCCCTTTG	GTGGAAAGGACGAAACACCGGGTCAAACCCCTCCCTTTGGTTTTAGAGCTAGGCCAACATGAGGATCAC	chr12:114463919-114463938
CHDEnh2	CHDEnh2:7	TGCTGCCCCGGAAGTGAGG	GTGGAAAGGACGAAACACCGTGCTGCCCCGGAAGTGAGGGTTTTAGAGCTAGGCCAACATGAGGATCAC	chr12:114463965-114463984
CHDEnh2	CHDEnh2:8	AGGTTGGGTGACTCCCCCA	GTGGAAAGGACGAAACACCGAGGTTGGGTGACTCCCCCAGTTTTAGAGCTAGGCCAACATGAGGATCAC	chr12:114464027-114464046
CHDEnh3	CHDEnh3:1	AAGGCACAGGTTCGTCCTG	GTGGAAAGGACGAAACACCGAAGGCACAGGTTCGTCCTGGTTTTAGAGCTAGGCCAACATGAGGATCAC	chr12:114701282-114701301
CHDEnh3	CHDEnh3:2	GTCCAACGCAACGGTCCCT	GTGGAAAGGACGAAACACCGGTCCAACGCAACGGTCCCTGTTTTAGAGCTAGGCCAACATGAGGATCAC	chr12:114701678-114701697
CHDEnh3	CHDEnh3:3	GTCGCTTCCGGCTGGTTTG	GTGGAAAGGACGAAACACCGGTCGCTTCCGGCTGGTTTGGTTTTAGAGCTAGGCCAACATGAGGATCAC	chr12:114701908-114701927
CHDEnh3	CHDEnh3:4	CTTGGCGGTGTTTCTGCGC	GTGGAAAGGACGAAACACCGCTTGGCGGTGTTTCTGCGCGTTTTAGAGCTAGGCCAACATGAGGATCAC	chr12:114702349-114702368
CHDEnh3	CHDEnh3:5	GCATGCGTTTCGCCCACCC	GTGGAAAGGACGAAACACCGGCATGCGTTTCGCCCACCCGTTTTAGAGCTAGGCCAACATGAGGATCAC	chr12:114702756-114702775
CHDEnh3	CHDEnh3:6	ATCCCTAGCGGCTGCAGAG	GTGGAAAGGACGAAACACCGATCCCTAGCGGCTGCAGAGGTTTTAGAGCTAGGCCAACATGAGGATCAC	chr12:114703714-114703733
CHDEnh3	CHDEnh3:7	CGGCCCCTCTTTACCGGAT	GTGGAAAGGACGAAACACCGCGGCCCCTCTTTACCGGATGTTTTAGAGCTAGGCCAACATGAGGATCAC	chr12:114704275-114704294
CHDEnh3	CHDEnh3:8	TGACGCTTTCGAAACCAAA	GTGGAAAGGACGAAACACCGTGACGCTTTCGAAACCAAAGTTTTAGAGCTAGGCCAACATGAGGATCAC	chr12:114704579-114704598
CHDEnh4	CHDEnh4:1	GGGCAGCCATTAGCTAGGA	GTGGAAAGGACGAAACACCGGGGCAGCCATTAGCTAGGAGTTTTAGAGCTAGGCCAACATGAGGATCAC	chr12:114773383-114773402
CHDEnh4	CHDEnh4:2	CTACTCACTAGAGGGTGGT	GTGGAAAGGACGAAACACCGCTACTCACTAGAGGGTGGTGTTTTAGAGCTAGGCCAACATGAGGATCAC	chr12:114773438-114773457
CHDEnh4	CHDEnh4:3	TCTGACGTTACAAGCTAAA	GTGGAAAGGACGAAACACCGTCTGACGTTACAAGCTAAAGTTTTAGAGCTAGGCCAACATGAGGATCAC	chr12:114773491-114773510
CHDEnh4	CHDEnh4:4	AGTACGGGCTTTGAATGCC	GTGGAAAGGACGAAACACCGAGTACGGGCTTTGAATGCCGTTTTAGAGCTAGGCCAACATGAGGATCAC	chr12:114773545-114773564
CHDEnh4	CHDEnh4:5	GAATGTGCGTGATGTATTT	GTGGAAAGGACGAAACACCGGAATGTGCGTGATGTATTTGTTTTAGAGCTAGGCCAACATGAGGATCAC	chr12:114773620-114773639
CHDEnh4	CHDEnh4:6	AGCTTTCCCAGACCTCCTC	GTGGAAAGGACGAAACACCGAGCTTTCCCAGACCTCCTCGTTTTAGAGCTAGGCCAACATGAGGATCAC	chr12:114773687-114773706
CHDEnh4	CHDEnh4:7	ACCCAGTGGTGAATCAGTG	GTGGAAAGGACGAAACACCGACCCAGTGGTGAATCAGTGGTTTTAGAGCTAGGCCAACATGAGGATCAC	chr12:114773771-114773790
CHDEnh4	CHDEnh4:8	CCAACCGAAGGTCAGATCG	GTGGAAAGGACGAAACACCGCCAACCGAAGGTCAGATCGGTTTTAGAGCTAGGCCAACATGAGGATCAC	chr12:114773822-114773841
CHDEnh5	CHDEnh5:1	GGTTCTTGAACCTCGAGCA	GTGGAAAGGACGAAACACCGGGTTCTTGAACCTCGAGCAGTTTTAGAGCTAGGCCAACATGAGGATCAC	chr12:114799377-114799396
CHDEnh5	CHDEnh5:2	ATGTAAGTGTTATCAGAAA	GTGGAAAGGACGAAACACCGATGTAAGTGTTATCAGAAAGTTTTAGAGCTAGGCCAACATGAGGATCAC	chr12:114799412-114799431
CHDEnh5	CHDEnh5:3	GAGGCAGAAAGTGGGTTTG	GTGGAAAGGACGAAACACCGGAGGCAGAAAGTGGGTTTGGTTTTAGAGCTAGGCCAACATGAGGATCAC	chr12:114799479-114799498
CHDEnh5	CHDEnh5:4	GCCTAGGGGCAGAAGGGAA	GTGGAAAGGACGAAACACCGGCCTAGGGGCAGAAGGGAAGTTTTAGAGCTAGGCCAACATGAGGATCAC	chr12:114799525-114799544
CHDEnh5	CHDEnh5:5	GAAAACACGGCCACTAAGC	GTGGAAAGGACGAAACACCGGAAAACACGGCCACTAAGCGTTTTAGAGCTAGGCCAACATGAGGATCAC	chr12:114799553-114799572
CHDEnh5	CHDEnh5:6	ACCACTTTTTAAGTTAAAG	GTGGAAAGGACGAAACACCGACCACTTTTTAAGTTAAAGGTTTTAGAGCTAGGCCAACATGAGGATCAC	chr12:114799650-114799669
CHDEnh5	CHDEnh5:7	AATAGTAACAAGTCAACGT	GTGGAAAGGACGAAACACCGAATAGTAACAAGTCAACGTGTTTTAGAGCTAGGCCAACATGAGGATCAC	chr12:114799744-114799763
CHDEnh5	CHDEnh5:8	CTATTTTTGCAGCTTCCTT	GTGGAAAGGACGAAACACCGCTATTTTTGCAGCTTCCTTGTTTTAGAGCTAGGCCAACATGAGGATCAC	chr12:114799836-114799855
GATA4_ENH1	GATA4_ENH1:1	CTCCAGCCAGCTGACGTCC	GTGGAAAGGACGAAACACCGCTCCAGCCAGCTGACGTCCGTTTTAGAGCTAGGCCAACATGAGGATCAC	chr8:11599990-11600009
GATA4_ENH1	GATA4_ENH1:2	CTGCTTCTGACCCTTATAA	GTGGAAAGGACGAAACACCGCTGCTTCTGACCCTTATAAGTTTTAGAGCTAGGCCAACATGAGGATCAC	chr8:11600023-11600042
GATA4_ENH1	GATA4_ENH1:3	GCCTCTGTTCAGCAGCTGC	GTGGAAAGGACGAAACACCGGCCTCTGTTCAGCAGCTGCGTTTTAGAGCTAGGCCAACATGAGGATCAC	chr8:11600092-11600111
GATA4_ENH1	GATA4_ENH1:4	CTCCAGCGGCGCTCCGGCC	GTGGAAAGGACGAAACACCGCTCCAGCGGCGCTCCGGCCGTTTTAGAGCTAGGCCAACATGAGGATCAC	chr8:11600142-11600161
GATA4_ENH1	GATA4_ENH1:5	GACGAAGCCCAGAAGACCC	GTGGAAAGGACGAAACACCGGACGAAGCCCAGAAGACCCGTTTTAGAGCTAGGCCAACATGAGGATCAC	chr8:11600212-11600231
GATA4_ENH1	GATA4_ENH1:6	GGCCTCGTGCCCCACACCC	GTGGAAAGGACGAAACACCGGGCCTCGTGCCCCACACCCGTTTTAGAGCTAGGCCAACATGAGGATCAC	chr8:11600271-11600290
GATA4_ENH1	GATA4_ENH1:7	ATGTCCCTTGCTGAACCCC	GTGGAAAGGACGAAACACCGATGTCCCTTGCTGAACCCCGTTTTAGAGCTAGGCCAACATGAGGATCAC	chr8:11600373-11600392
GATA4_ENH1	GATA4_ENH1:8	TGAAGCCCCTTTGGTTCCC	GTGGAAAGGACGAAACACCGTGAAGCCCCTTTGGTTCCCGTTTTAGAGCTAGGCCAACATGAGGATCAC	chr8:11600416-11600435
GATA4_PROM1	GATA4_PROM1:1	ACTATTATCCCATGCCCAG	GTGGAAAGGACGAAACACCGACTATTATCCCATGCCCAGGTTTTAGAGCTAGGCCAACATGAGGATCAC	chr8:11534068-11534087
GATA4_PROM1	GATA4_PROM1:2	CTATTATCCCATGCCCAGA	GTGGAAAGGACGAAACACCGCTATTATCCCATGCCCAGAGTTTTAGAGCTAGGCCAACATGAGGATCAC	chr8:11534069-11534088
GATA4_PROM1	GATA4_PROM1:3	CCCATGAACGGCGATTCCT	GTGGAAAGGACGAAACACCGCCCATGAACGGCGATTCCTGTTTTAGAGCTAGGCCAACATGAGGATCAC	chr8:11534213-11534232
GATA4_PROM1	GATA4_PROM1:4	TGGTGTGTGTAAAAGTGGA	GTGGAAAGGACGAAACACCGTGGTGTGTGTAAAAGTGGAGTTTTAGAGCTAGGCCAACATGAGGATCAC	chr8:11534335-11534354
GATA4_PROM1	GATA4_PROM1:5	GGGACGCCGCTCCCCACCG	GTGGAAAGGACGAAACACCGGGGACGCCGCTCCCCACCGGTTTTAGAGCTAGGCCAACATGAGGATCAC	chr8:11534550-11534569
GATA4_PROM1	GATA4_PROM1:6	AGTCCCCTCCTGGCCCTCC	GTGGAAAGGACGAAACACCGAGTCCCCTCCTGGCCCTCCGTTTTAGAGCTAGGCCAACATGAGGATCAC	chr8:11534575-11534594
GATA4_PROM1	GATA4_PROM1:7	TCCGCCTCGGCCCCACGCT	GTGGAAAGGACGAAACACCGTCCGCCTCGGCCCCACGCTGTTTTAGAGCTAGGCCAACATGAGGATCAC	chr8:11534720-11534739
GATA4_PROM1	GATA4_PROM1:8	ATGCCACCTCAGTGGAAGA	GTGGAAAGGACGAAACACCGATGCCACCTCAGTGGAAGAGTTTTAGAGCTAGGCCAACATGAGGATCAC	chr8:11534850-11534869
GATA4_PROM2	GATA4_PROM2:1	CCTCCAAGGAATCCGGGGC	GTGGAAAGGACGAAACACCGCCTCCAAGGAATCCGGGGCGTTTTAGAGCTAGGCCAACATGAGGATCAC	chr8:11561220-11561239
GATA4_PROM2	GATA4_PROM2:2	CGCCCGCCGCTGCGGGATG	GTGGAAAGGACGAAACACCGCGCCCGCCGCTGCGGGATGGTTTTAGAGCTAGGCCAACATGAGGATCAC	chr8:11561367-11561386
GATA4_PROM2	GATA4_PROM2:3	TCGACCTCCGGCTGGGTTG	GTGGAAAGGACGAAACACCGTCGACCTCCGGCTGGGTTGGTTTTAGAGCTAGGCCAACATGAGGATCAC	chr8:11561466-11561485
GATA4_PROM2	GATA4_PROM2:4	CTACACCTCCGCTGGGCGC	GTGGAAAGGACGAAACACCGCTACACCTCCGCTGGGCGCGTTTTAGAGCTAGGCCAACATGAGGATCAC	chr8:11561591-11561610
GATA4_PROM2	GATA4_PROM2:5	GCGGCGACGAAGCCTCTCG	GTGGAAAGGACGAAACACCGGCGGCGACGAAGCCTCTCGGTTTTAGAGCTAGGCCAACATGAGGATCAC	chr8:11561741-11561760
GATA4_PROM2	GATA4_PROM2:6	AGTTTGGGGGACCGCGGGA	GTGGAAAGGACGAAACACCGAGTTTGGGGGACCGCGGGAGTTTTAGAGCTAGGCCAACATGAGGATCAC	chr8:11561845-11561864
GATA4_PROM2	GATA4_PROM2:7	GAAAGCGTTCAAGTTCACA	GTGGAAAGGACGAAACACCGGAAAGCGTTCAAGTTCACAGTTTTAGAGCTAGGCCAACATGAGGATCAC	chr8:11562059-11562078
GATA4_PROM2	GATA4_PROM2:8	ACCCTTGTTTGCATATCGC	GTGGAAAGGACGAAACACCGACCCTTGTTTGCATATCGCGTTTTAGAGCTAGGCCAACATGAGGATCAC	chr8:11562107-11562126
GATA4_PROM3	GATA4_PROM3:1	GTGGGCACGTAGACTGGCG	GTGGAAAGGACGAAACACCGGTGGGCACGTAGACTGGCGGTTTTAGAGCTAGGCCAACATGAGGATCAC	chr8:11565924-11565943
GATA4_PROM3	GATA4_PROM3:2	GCACCAGACGCGGCCCCAC	GTGGAAAGGACGAAACACCGGCACCAGACGCGGCCCCACGTTTTAGAGCTAGGCCAACATGAGGATCAC	chr8:11566035-11566054
GATA4_PROM3	GATA4_PROM3:3	CTGTAGGCCGCAGCTTCCC	GTGGAAAGGACGAAACACCGCTGTAGGCCGCAGCTTCCCGTTTTAGAGCTAGGCCAACATGAGGATCAC	chr8:11566200-11566219
GATA4_PROM3	GATA4_PROM3:4	ATGTAAGCCGGGTAGGGGC	GTGGAAAGGACGAAACACCGATGTAAGCCGGGTAGGGGCGTTTTAGAGCTAGGCCAACATGAGGATCAC	chr8:11566299-11566318
GATA4_PROM3	GATA4_PROM3:5	ATTGGGGTGTCGGGCGGCC	GTGGAAAGGACGAAACACCGATTGGGGTGTCGGGCGGCCGTTTTAGAGCTAGGCCAACATGAGGATCAC	chr8:11566414-11566433
GATA4_PROM3	GATA4_PROM3:6	TCACTACCTCGAGTTTCTA	GTGGAAAGGACGAAACACCGTCACTACCTCGAGTTTCTAGTTTTAGAGCTAGGCCAACATGAGGATCAC	chr8:11566552-11566571
GATA4_PROM3	GATA4_PROM3:7	CTCTTCTGAGATGGTGTCA	GTGGAAAGGACGAAACACCGCTCTTCTGAGATGGTGTCAGTTTTAGAGCTAGGCCAACATGAGGATCAC	chr8:11566659-11566678
GATA4_PROM3	GATA4_PROM3:8	CCTGGGATTTCCTCGTGGA	GTGGAAAGGACGAAACACCGCCTGGGATTTCCTCGTGGAGTTTTAGAGCTAGGCCAACATGAGGATCAC	chr8:11566784-11566803
GLI2_ENH1	GLI2_ENH1:1	TTCCTTTTGGCACGCGCTA	GTGGAAAGGACGAAACACCGTTCCTTTTGGCACGCGCTAGTTTTAGAGCTAGGCCAACATGAGGATCAC	chr2:121523417-121523436
GLI2_ENH1	GLI2_ENH1:2	GCAGGAAAAGCACTCCTCC	GTGGAAAGGACGAAACACCGGCAGGAAAAGCACTCCTCCGTTTTAGAGCTAGGCCAACATGAGGATCAC	chr2:121523510-121523529
GLI2_ENH1	GLI2_ENH1:3	TCCGAGACCTTGCCCACAG	GTGGAAAGGACGAAACACCGTCCGAGACCTTGCCCACAGGTTTTAGAGCTAGGCCAACATGAGGATCAC	chr2:121523587-121523606
GLI2_ENH1	GLI2_ENH1:4	GCCACGCGAGAGGGGAGCT	GTGGAAAGGACGAAACACCGGCCACGCGAGAGGGGAGCTGTTTTAGAGCTAGGCCAACATGAGGATCAC	chr2:121523626-121523645
GLI2_ENH1	GLI2_ENH1:5	CATCACGATGGGGAGGGTT	GTGGAAAGGACGAAACACCGCATCACGATGGGGAGGGTTGTTTTAGAGCTAGGCCAACATGAGGATCAC	chr2:121523662-121523681
GLI2_ENH1	GLI2_ENH1:6	AAGGCTGCGAGGTCACAGA	GTGGAAAGGACGAAACACCGAAGGCTGCGAGGTCACAGAGTTTTAGAGCTAGGCCAACATGAGGATCAC	chr2:121523759-121523778
GLI2_ENH1	GLI2_ENH1:7	CAAACTGAGGCGCCACAGC	GTGGAAAGGACGAAACACCGCAAACTGAGGCGCCACAGCGTTTTAGAGCTAGGCCAACATGAGGATCAC	chr2:121523785-121523804
GLI2_ENH1	GLI2_ENH1:8	GACGCTCTTCACACTGTCT	GTGGAAAGGACGAAACACCGGACGCTCTTCACACTGTCTGTTTTAGAGCTAGGCCAACATGAGGATCAC	chr2:121523860-121523879
GLI2_PROM1	GLI2_PROM1:1	CACGCGGACCCTCTTCCCG	GTGGAAAGGACGAAACACCGCACGCGGACCCTCTTCCCGGTTTTAGAGCTAGGCCAACATGAGGATCAC	chr2:121492947-121492966
GLI2_PROM1	GLI2_PROM1:2	AGCCCTTGCCCCTCAGCTC	GTGGAAAGGACGAAACACCGAGCCCTTGCCCCTCAGCTCGTTTTAGAGCTAGGCCAACATGAGGATCAC	chr2:121493119-121493138
GLI2_PROM1	GLI2_PROM1:3	CGGAGATTGGCGCGTCCTT	GTGGAAAGGACGAAACACCGCGGAGATTGGCGCGTCCTTGTTTTAGAGCTAGGCCAACATGAGGATCAC	chr2:121493210-121493229
GLI2_PROM1	GLI2_PROM1:4	ACCCGAACGCCGCCGGGGC	GTGGAAAGGACGAAACACCGACCCGAACGCCGCCGGGGCGTTTTAGAGCTAGGCCAACATGAGGATCAC	chr2:121493321-121493340
GLI2_PROM1	GLI2_PROM1:5	TGCCTCGGCTGGCAAGCGC	GTGGAAAGGACGAAACACCGTGCCTCGGCTGGCAAGCGCGTTTTAGAGCTAGGCCAACATGAGGATCAC	chr2:121493466-121493485
GLI2_PROM1	GLI2_PROM1:6	CGCGGCGCGCCGCAGCCTC	GTGGAAAGGACGAAACACCGCGCGGCGCGCCGCAGCCTCGTTTTAGAGCTAGGCCAACATGAGGATCAC	chr2:121493622-121493641
GLI2_PROM1	GLI2_PROM1:7	GGCGGGCCAGGCAAGAGAG	GTGGAAAGGACGAAACACCGGGCGGGCCAGGCAAGAGAGGTTTTAGAGCTAGGCCAACATGAGGATCAC	chr2:121493701-121493720
GLI2_PROM1	GLI2_PROM1:8	TAGCACGCAGGTGGCCTCT	GTGGAAAGGACGAAACACCGTAGCACGCAGGTGGCCTCTGTTTTAGAGCTAGGCCAACATGAGGATCAC	chr2:121493819-121493838
IRX4_ENH1	IRX4_ENH1:1	CCTGGCGACCCCTGAGTTG	GTGGAAAGGACGAAACACCGCCTGGCGACCCCTGAGTTGGTTTTAGAGCTAGGCCAACATGAGGATCAC	chr5:1841157-1841176
IRX4_ENH1	IRX4_ENH1:2	CACGCTTCATCCCCAGCGC	GTGGAAAGGACGAAACACCGCACGCTTCATCCCCAGCGCGTTTTAGAGCTAGGCCAACATGAGGATCAC	chr5:1841229-1841248
IRX4_ENH1	IRX4_ENH1:3	AGGGTGCAGATAAGGCACC	GTGGAAAGGACGAAACACCGAGGGTGCAGATAAGGCACCGTTTTAGAGCTAGGCCAACATGAGGATCAC	chr5:1841304-1841323
IRX4_ENH1	IRX4_ENH1:4	GGTTATCTGGCTTGACCTT	GTGGAAAGGACGAAACACCGGGTTATCTGGCTTGACCTTGTTTTAGAGCTAGGCCAACATGAGGATCAC	chr5:1841331-1841350
IRX4_ENH1	IRX4_ENH1:5	CAGCCTTCCTGAGTGGTCA	GTGGAAAGGACGAAACACCGCAGCCTTCCTGAGTGGTCAGTTTTAGAGCTAGGCCAACATGAGGATCAC	chr5:1841417-1841436
IRX4_ENH1	IRX4_ENH1:6	GCGCAGGGATGGCGCTGAC	GTGGAAAGGACGAAACACCGGCGCAGGGATGGCGCTGACGTTTTAGAGCTAGGCCAACATGAGGATCAC	chr5:1841485-1841504
IRX4_ENH1	IRX4_ENH1:7	GCCGGCACAGCTGGGTGTC	GTGGAAAGGACGAAACACCGGCCGGCACAGCTGGGTGTCGTTTTAGAGCTAGGCCAACATGAGGATCAC	chr5:1841512-1841531
IRX4_ENH1	IRX4_ENH1:8	CAGCCGCTGCTCCAGGGCC	GTGGAAAGGACGAAACACCGCAGCCGCTGCTCCAGGGCCGTTTTAGAGCTAGGCCAACATGAGGATCAC	chr5:1841589-1841608
IRX4_PROM1	IRX4_PROM1:1	CCTGCAGGGTTCTGCGCGC	GTGGAAAGGACGAAACACCGCCTGCAGGGTTCTGCGCGCGTTTTAGAGCTAGGCCAACATGAGGATCAC	chr5:1882792-1882811
IRX4_PROM1	IRX4_PROM1:2	TTCCTTTAACTTCGCATTC	GTGGAAAGGACGAAACACCGTTCCTTTAACTTCGCATTCGTTTTAGAGCTAGGCCAACATGAGGATCAC	chr5:1882956-1882975
IRX4_PROM1	IRX4_PROM1:3	CGCGCACATCTGACTTGAC	GTGGAAAGGACGAAACACCGCGCGCACATCTGACTTGACGTTTTAGAGCTAGGCCAACATGAGGATCAC	chr5:1883075-1883094
IRX4_PROM1	IRX4_PROM1:4	CTCGCCGGTCACTCGCCGG	GTGGAAAGGACGAAACACCGCTCGCCGGTCACTCGCCGGGTTTTAGAGCTAGGCCAACATGAGGATCAC	chr5:1883155-1883174
IRX4_PROM1	IRX4_PROM1:5	TTAGTCACCCGAGAACGAG	GTGGAAAGGACGAAACACCGTTAGTCACCCGAGAACGAGGTTTTAGAGCTAGGCCAACATGAGGATCAC	chr5:1883296-1883315
IRX4_PROM1	IRX4_PROM1:6	CGGCCGCCTGCGCAGCGCC	GTGGAAAGGACGAAACACCGCGGCCGCCTGCGCAGCGCCGTTTTAGAGCTAGGCCAACATGAGGATCAC	chr5:1883446-1883465
IRX4_PROM1	IRX4_PROM1:7	AATCAGCAACGCCTCCCGC	GTGGAAAGGACGAAACACCGAATCAGCAACGCCTCCCGCGTTTTAGAGCTAGGCCAACATGAGGATCAC	chr5:1883556-1883575
IRX4_PROM1	IRX4_PROM1:8	CGAAGCCCCCACGCACCTG	GTGGAAAGGACGAAACACCGCGAAGCCCCCACGCACCTGGTTTTAGAGCTAGGCCAACATGAGGATCAC	chr5:1883657-1883676
IRX4_PROM2	IRX4_PROM2:1	CCTGTGCCCGCCCACCGCT	GTGGAAAGGACGAAACACCGCCTGTGCCCGCCCACCGCTGTTTTAGAGCTAGGCCAACATGAGGATCAC	chr5:1886496-1886515
IRX4_PROM2	IRX4_PROM2:2	TCCTACCACTGGCTCCGAG	GTGGAAAGGACGAAACACCGTCCTACCACTGGCTCCGAGGTTTTAGAGCTAGGCCAACATGAGGATCAC	chr5:1886620-1886639
IRX4_PROM2	IRX4_PROM2:3	GCCGTACCCAGGGAGCAAG	GTGGAAAGGACGAAACACCGGCCGTACCCAGGGAGCAAGGTTTTAGAGCTAGGCCAACATGAGGATCAC	chr5:1886739-1886758
IRX4_PROM2	IRX4_PROM2:4	TGCGTTTGCTGCAAGTTGC	GTGGAAAGGACGAAACACCGTGCGTTTGCTGCAAGTTGCGTTTTAGAGCTAGGCCAACATGAGGATCAC	chr5:1886859-1886878
IRX4_PROM2	IRX4_PROM2:5	AGCTCCCGCCCGCGCCGTG	GTGGAAAGGACGAAACACCGAGCTCCCGCCCGCGCCGTGGTTTTAGAGCTAGGCCAACATGAGGATCAC	chr5:1886987-1887006
IRX4_PROM2	IRX4_PROM2:6	GAGGGGTCTCGGAACCCCG	GTGGAAAGGACGAAACACCGGAGGGGTCTCGGAACCCCGGTTTTAGAGCTAGGCCAACATGAGGATCAC	chr5:1887124-1887143
IRX4_PROM2	IRX4_PROM2:7	GTTGTCGCCGGCTCCCCGC	GTGGAAAGGACGAAACACCGGTTGTCGCCGGCTCCCCGCGTTTTAGAGCTAGGCCAACATGAGGATCAC	chr5:1887245-1887264
IRX4_PROM2	IRX4_PROM2:8	CGTTAATGGGCGGCCGGGT	GTGGAAAGGACGAAACACCGCGTTAATGGGCGGCCGGGTGTTTTAGAGCTAGGCCAACATGAGGATCAC	chr5:1887383-1887402
ISL1_PROM1	ISL1_PROM1:1	CAATCAGGTTGGAACGCAC	GTGGAAAGGACGAAACACCGCAATCAGGTTGGAACGCACGTTTTAGAGCTAGGCCAACATGAGGATCAC	chr5:50678472-50678491
ISL1_PROM1	ISL1_PROM1:2	ATGGGATGATTAAACCCAG	GTGGAAAGGACGAAACACCGATGGGATGATTAAACCCAGGTTTTAGAGCTAGGCCAACATGAGGATCAC	chr5:50678592-50678611
ISL1_PROM1	ISL1_PROM1:3	TGGTTTGGTCCCCACGCCG	GTGGAAAGGACGAAACACCGTGGTTTGGTCCCCACGCCGGTTTTAGAGCTAGGCCAACATGAGGATCAC	chr5:50678711-50678730
ISL1_PROM1	ISL1_PROM1:4	GTGAGCCCCGCGCGCAACG	GTGGAAAGGACGAAACACCGGTGAGCCCCGCGCGCAACGGTTTTAGAGCTAGGCCAACATGAGGATCAC	chr5:50678833-50678852
ISL1_PROM1	ISL1_PROM1:5	GCCCGGCAGCCCGAGCTTC	GTGGAAAGGACGAAACACCGGCCCGGCAGCCCGAGCTTCGTTTTAGAGCTAGGCCAACATGAGGATCAC	chr5:50679000-50679019
ISL1_PROM1	ISL1_PROM1:6	CTGAGCGCCACTGACCGCT	GTGGAAAGGACGAAACACCGCTGAGCGCCACTGACCGCTGTTTTAGAGCTAGGCCAACATGAGGATCAC	chr5:50679087-50679106
ISL1_PROM1	ISL1_PROM1:7	AACTCAGCTCCATCGCCAT	GTGGAAAGGACGAAACACCGAACTCAGCTCCATCGCCATGTTTTAGAGCTAGGCCAACATGAGGATCAC	chr5:50679209-50679228
ISL1_PROM1	ISL1_PROM1:8	TTGGACTCCTAGATCCGCG	GTGGAAAGGACGAAACACCGTTGGACTCCTAGATCCGCGGTTTTAGAGCTAGGCCAACATGAGGATCAC	chr5:50679332-50679351
MEIS1_ENH1	MEIS1_ENH1:1	TGTCAACGGGCTGCACCTA	GTGGAAAGGACGAAACACCGTGTCAACGGGCTGCACCTAGTTTTAGAGCTAGGCCAACATGAGGATCAC	chr2:66666440-66666459
MEIS1_ENH1	MEIS1_ENH1:2	CACCGAGATCCCCCGAGCC	GTGGAAAGGACGAAACACCGCACCGAGATCCCCCGAGCCGTTTTAGAGCTAGGCCAACATGAGGATCAC	chr2:66666510-66666529
MEIS1_ENH1	MEIS1_ENH1:3	GTTCCTGCGGGTTCCTCCT	GTGGAAAGGACGAAACACCGGTTCCTGCGGGTTCCTCCTGTTTTAGAGCTAGGCCAACATGAGGATCAC	chr2:66666549-66666568
MEIS1_ENH1	MEIS1_ENH1:4	CTGCACATCCAGGATCCGG	GTGGAAAGGACGAAACACCGCTGCACATCCAGGATCCGGGTTTTAGAGCTAGGCCAACATGAGGATCAC	chr2:66666608-66666627
MEIS1_ENH1	MEIS1_ENH1:5	CGTATCTGGCCGGAGAAAT	GTGGAAAGGACGAAACACCGCGTATCTGGCCGGAGAAATGTTTTAGAGCTAGGCCAACATGAGGATCAC	chr2:66666715-66666734
MEIS1_ENH1	MEIS1_ENH1:6	AGGATCGGTTTAGCGTATC	GTGGAAAGGACGAAACACCGAGGATCGGTTTAGCGTATCGTTTTAGAGCTAGGCCAACATGAGGATCAC	chr2:66666728-66666747
MEIS1_ENH1	MEIS1_ENH1:7	GTGAGCGGTCACCTGGGTC	GTGGAAAGGACGAAACACCGGTGAGCGGTCACCTGGGTCGTTTTAGAGCTAGGCCAACATGAGGATCAC	chr2:66666803-66666822
MEIS1_ENH1	MEIS1_ENH1:8	TAGATGACACAATCGGAGA	GTGGAAAGGACGAAACACCGTAGATGACACAATCGGAGAGTTTTAGAGCTAGGCCAACATGAGGATCAC	chr2:66666850-66666869
MEIS1_ENH2	MEIS1_ENH2:1	CATCCTGATCCCCTGCAGC	GTGGAAAGGACGAAACACCGCATCCTGATCCCCTGCAGCGTTTTAGAGCTAGGCCAACATGAGGATCAC	chr2:66708234-66708253
MEIS1_ENH2	MEIS1_ENH2:2	ACCCAGGACATGTAAGCTC	GTGGAAAGGACGAAACACCGACCCAGGACATGTAAGCTCGTTTTAGAGCTAGGCCAACATGAGGATCAC	chr2:66708261-66708280
MEIS1_ENH2	MEIS1_ENH2:3	TCTTCCTACTACTCACTGA	GTGGAAAGGACGAAACACCGTCTTCCTACTACTCACTGAGTTTTAGAGCTAGGCCAACATGAGGATCAC	chr2:66708333-66708352
MEIS1_ENH2	MEIS1_ENH2:4	GGCTCTCTATTCTGGTGCT	GTGGAAAGGACGAAACACCGGGCTCTCTATTCTGGTGCTGTTTTAGAGCTAGGCCAACATGAGGATCAC	chr2:66708385-66708404
MEIS1_ENH2	MEIS1_ENH2:5	GCTGGCTACATAGCAATGG	GTGGAAAGGACGAAACACCGGCTGGCTACATAGCAATGGGTTTTAGAGCTAGGCCAACATGAGGATCAC	chr2:66708443-66708462
MEIS1_ENH2	MEIS1_ENH2:6	ATGCTGATAGGCAGCAGGA	GTGGAAAGGACGAAACACCGATGCTGATAGGCAGCAGGAGTTTTAGAGCTAGGCCAACATGAGGATCAC	chr2:66708536-66708555
MEIS1_ENH2	MEIS1_ENH2:7	AGCCAGCTAAAGCTAATCC	GTGGAAAGGACGAAACACCGAGCCAGCTAAAGCTAATCCGTTTTAGAGCTAGGCCAACATGAGGATCAC	chr2:66708583-66708602
MEIS1_ENH2	MEIS1_ENH2:8	AATGACGCTGCCATTCTTT	GTGGAAAGGACGAAACACCGAATGACGCTGCCATTCTTTGTTTTAGAGCTAGGCCAACATGAGGATCAC	chr2:66708634-66708653
MEIS1_PROM	MEIS1_PROM:1	GGGATCGTGGAGGAAAAGG	GTGGAAAGGACGAAACACCGGGGATCGTGGAGGAAAAGGGTTTTAGAGCTAGGCCAACATGAGGATCAC	chr2:66661771-66661790
MEIS1_PROM	MEIS1_PROM:2	AAGTCATGAAGTCTATGCG	GTGGAAAGGACGAAACACCGAAGTCATGAAGTCTATGCGGTTTTAGAGCTAGGCCAACATGAGGATCAC	chr2:66661892-66661911
MEIS1_PROM	MEIS1_PROM:3	AAAATAAAGCTGGCGGCCG	GTGGAAAGGACGAAACACCGAAAATAAAGCTGGCGGCCGGTTTTAGAGCTAGGCCAACATGAGGATCAC	chr2:66662029-66662048
MEIS1_PROM	MEIS1_PROM:4	AGCTCTGGCCGCACTGGAG	GTGGAAAGGACGAAACACCGAGCTCTGGCCGCACTGGAGGTTTTAGAGCTAGGCCAACATGAGGATCAC	chr2:66662136-66662155
MEIS1_PROM	MEIS1_PROM:5	GTGTGTTGCACAGGCGGAG	GTGGAAAGGACGAAACACCGGTGTGTTGCACAGGCGGAGGTTTTAGAGCTAGGCCAACATGAGGATCAC	chr2:66662276-66662295
MEIS1_PROM	MEIS1_PROM:6	CAGTGCAGCACTTGCAAAG	GTGGAAAGGACGAAACACCGCAGTGCAGCACTTGCAAAGGTTTTAGAGCTAGGCCAACATGAGGATCAC	chr2:66662400-66662419
MEIS1_PROM	MEIS1_PROM:7	CATCCGCTCTGTCTTCTTC	GTGGAAAGGACGAAACACCGCATCCGCTCTGTCTTCTTCGTTTTAGAGCTAGGCCAACATGAGGATCAC	chr2:66662550-66662569
MEIS1_PROM	MEIS1_PROM:8	ATTTGGTAGTTGGGTCTGA	GTGGAAAGGACGAAACACCGATTTGGTAGTTGGGTCTGAGTTTTAGAGCTAGGCCAACATGAGGATCAC	chr2:66662635-66662654
MSX2_ENH1	MSX2_ENH1:1	TTTCAAAATTATCGATAAA	GTGGAAAGGACGAAACACCGTTTCAAAATTATCGATAAAGTTTTAGAGCTAGGCCAACATGAGGATCAC	chr5:174119979-174119998
MSX2_ENH1	MSX2_ENH1:2	TGCCTCGTGGAGAATCCAA	GTGGAAAGGACGAAACACCGTGCCTCGTGGAGAATCCAAGTTTTAGAGCTAGGCCAACATGAGGATCAC	chr5:174120035-174120054
MSX2_ENH1	MSX2_ENH1:3	GGGCTAATAAAGCGTTGAA	GTGGAAAGGACGAAACACCGGGGCTAATAAAGCGTTGAAGTTTTAGAGCTAGGCCAACATGAGGATCAC	chr5:174120114-174120133
MSX2_ENH1	MSX2_ENH1:4	GATTGAGGAAAGCTATTCA	GTGGAAAGGACGAAACACCGGATTGAGGAAAGCTATTCAGTTTTAGAGCTAGGCCAACATGAGGATCAC	chr5:174120182-174120201
MSX2_ENH1	MSX2_ENH1:5	AGCAACTCTGGAAACACAG	GTGGAAAGGACGAAACACCGAGCAACTCTGGAAACACAGGTTTTAGAGCTAGGCCAACATGAGGATCAC	chr5:174120263-174120282
MSX2_ENH1	MSX2_ENH1:6	TTGACCTTCATTGGACAGT	GTGGAAAGGACGAAACACCGTTGACCTTCATTGGACAGTGTTTTAGAGCTAGGCCAACATGAGGATCAC	chr5:174120307-174120326
MSX2_ENH1	MSX2_ENH1:7	AAGAAAGAGCGTCAATCAC	GTGGAAAGGACGAAACACCGAAGAAAGAGCGTCAATCACGTTTTAGAGCTAGGCCAACATGAGGATCAC	chr5:174120383-174120402
MSX2_ENH1	MSX2_ENH1:8	TGACTTAAAGGGGGGTGTC	GTGGAAAGGACGAAACACCGTGACTTAAAGGGGGGTGTCGTTTTAGAGCTAGGCCAACATGAGGATCAC	chr5:174120409-174120428
MSX2_PROM1	MSX2_PROM1:1	AGTCGGTGCTGAAACTCAC	GTGGAAAGGACGAAACACCGAGTCGGTGCTGAAACTCACGTTTTAGAGCTAGGCCAACATGAGGATCAC	chr5:174151091-174151110
MSX2_PROM1	MSX2_PROM1:2	TTTTGACCCTTCTTTAAAA	GTGGAAAGGACGAAACACCGTTTTGACCCTTCTTTAAAAGTTTTAGAGCTAGGCCAACATGAGGATCAC	chr5:174151237-174151256
MSX2_PROM1	MSX2_PROM1:3	GGCGTGATTATAACCCTTC	GTGGAAAGGACGAAACACCGGGCGTGATTATAACCCTTCGTTTTAGAGCTAGGCCAACATGAGGATCAC	chr5:174151331-174151350
MSX2_PROM1	MSX2_PROM1:4	CCTTCGGGAAGAGCCAATC	GTGGAAAGGACGAAACACCGCCTTCGGGAAGAGCCAATCGTTTTAGAGCTAGGCCAACATGAGGATCAC	chr5:174151454-174151473
MSX2_PROM1	MSX2_PROM1:5	TTTTGCTGCGGAGACGGGA	GTGGAAAGGACGAAACACCGTTTTGCTGCGGAGACGGGAGTTTTAGAGCTAGGCCAACATGAGGATCAC	chr5:174151574-174151593
MSX2_PROM1	MSX2_PROM1:6	GTGGTGGCCGGACCAGGCC	GTGGAAAGGACGAAACACCGGTGGTGGCCGGACCAGGCCGTTTTAGAGCTAGGCCAACATGAGGATCAC	chr5:174151719-174151738
MSX2_PROM1	MSX2_PROM1:7	GCGGGGACGCCTCCTTGGG	GTGGAAAGGACGAAACACCGGCGGGGACGCCTCCTTGGGGTTTTAGAGCTAGGCCAACATGAGGATCAC	chr5:174151836-174151855
MSX2_PROM1	MSX2_PROM1:8	GAATTTTCCGACTTGACCG	GTGGAAAGGACGAAACACCGGAATTTTCCGACTTGACCGGTTTTAGAGCTAGGCCAACATGAGGATCAC	chr5:174151969-174151988
NKX2-6_ENH1	NKX2-6_ENH1:1	GCTGGGCGGCGGGTTTCAG	GTGGAAAGGACGAAACACCGGCTGGGCGGCGGGTTTCAGGTTTTAGAGCTAGGCCAACATGAGGATCAC	chr8:23584032-23584051
NKX2-6_ENH1	NKX2-6_ENH1:2	TTTCTAGAAACCGGCCGGG	GTGGAAAGGACGAAACACCGTTTCTAGAAACCGGCCGGGGTTTTAGAGCTAGGCCAACATGAGGATCAC	chr8:23584112-23584131
NKX2-6_ENH1	NKX2-6_ENH1:3	GCAGATCTAAGGCCAGACC	GTGGAAAGGACGAAACACCGGCAGATCTAAGGCCAGACCGTTTTAGAGCTAGGCCAACATGAGGATCAC	chr8:23584161-23584180
NKX2-6_ENH1	NKX2-6_ENH1:4	TGCGACAAGGCGAACACCA	GTGGAAAGGACGAAACACCGTGCGACAAGGCGAACACCAGTTTTAGAGCTAGGCCAACATGAGGATCAC	chr8:23584217-23584236
NKX2-6_ENH1	NKX2-6_ENH1:5	AGCGCCTAGGAGGTGGCCG	GTGGAAAGGACGAAACACCGAGCGCCTAGGAGGTGGCCGGTTTTAGAGCTAGGCCAACATGAGGATCAC	chr8:23584294-23584313
NKX2-6_ENH1	NKX2-6_ENH1:6	AGCGGGACCACGGGCAGAG	GTGGAAAGGACGAAACACCGAGCGGGACCACGGGCAGAGGTTTTAGAGCTAGGCCAACATGAGGATCAC	chr8:23584341-23584360
NKX2-6_ENH1	NKX2-6_ENH1:7	AGACTGACGGCGGAGGCGG	GTGGAAAGGACGAAACACCGAGACTGACGGCGGAGGCGGGTTTTAGAGCTAGGCCAACATGAGGATCAC	chr8:23584414-23584433
NKX2-6_ENH1	NKX2-6_ENH1:8	GGTTGTTTTCGTTTGGCCC	GTGGAAAGGACGAAACACCGGGTTGTTTTCGTTTGGCCCGTTTTAGAGCTAGGCCAACATGAGGATCAC	chr8:23584470-23584489
NKX2-6_PROM1	NKX2-6_PROM1:1	AGTAAGGCCCTGAATCTCA	GTGGAAAGGACGAAACACCGAGTAAGGCCCTGAATCTCAGTTTTAGAGCTAGGCCAACATGAGGATCAC	chr8:23563615-23563634
NKX2-6_PROM1	NKX2-6_PROM1:2	AATACGCCTCCTATCTCCT	GTGGAAAGGACGAAACACCGAATACGCCTCCTATCTCCTGTTTTAGAGCTAGGCCAACATGAGGATCAC	chr8:23563742-23563761
NKX2-6_PROM1	NKX2-6_PROM1:3	ATGGTTCGGAGCCTCCTGG	GTGGAAAGGACGAAACACCGATGGTTCGGAGCCTCCTGGGTTTTAGAGCTAGGCCAACATGAGGATCAC	chr8:23563890-23563909
NKX2-6_PROM1	NKX2-6_PROM1:4	CCGGGCTCTTCCGCACCCG	GTGGAAAGGACGAAACACCGCCGGGCTCTTCCGCACCCGGTTTTAGAGCTAGGCCAACATGAGGATCAC	chr8:23563996-23564015
NKX2-6_PROM1	NKX2-6_PROM1:5	GCCCCGCCCCATCCGCCTT	GTGGAAAGGACGAAACACCGGCCCCGCCCCATCCGCCTTGTTTTAGAGCTAGGCCAACATGAGGATCAC	chr8:23564115-23564134
NKX2-6_PROM1	NKX2-6_PROM1:6	GGACCCGGGCCTACCAGCA	GTGGAAAGGACGAAACACCGGGACCCGGGCCTACCAGCAGTTTTAGAGCTAGGCCAACATGAGGATCAC	chr8:23564256-23564275
NKX2-6_PROM1	NKX2-6_PROM1:7	GAGAGGATTCGACGGGCGC	GTGGAAAGGACGAAACACCGGAGAGGATTCGACGGGCGCGTTTTAGAGCTAGGCCAACATGAGGATCAC	chr8:23564365-23564384
NKX2-6_PROM1	NKX2-6_PROM1:8	GTACTAGCGGGAGCTTCCG	GTGGAAAGGACGAAACACCGGTACTAGCGGGAGCTTCCGGTTTTAGAGCTAGGCCAACATGAGGATCAC	chr8:23564491-23564510
NKX3-1_PROM1	NKX3-1_PROM1:1	TCCTGCGCCGCCCTGACGC	GTGGAAAGGACGAAACACCGTCCTGCGCCGCCCTGACGCGTTTTAGAGCTAGGCCAACATGAGGATCAC	chr8:23539949-23539968
NKX3-1_PROM1	NKX3-1_PROM1:2	GGCGGACCCCCAGAGCTCG	GTGGAAAGGACGAAACACCGGGCGGACCCCCAGAGCTCGGTTTTAGAGCTAGGCCAACATGAGGATCAC	chr8:23540062-23540081
NKX3-1_PROM1	NKX3-1_PROM1:3	GGGAGGACGCAGCCGCGCC	GTGGAAAGGACGAAACACCGGGGAGGACGCAGCCGCGCCGTTTTAGAGCTAGGCCAACATGAGGATCAC	chr8:23540195-23540214
NKX3-1_PROM1	NKX3-1_PROM1:4	AGGAAGGACGTGAGCGGCT	GTGGAAAGGACGAAACACCGAGGAAGGACGTGAGCGGCTGTTTTAGAGCTAGGCCAACATGAGGATCAC	chr8:23540313-23540332
NKX3-1_PROM1	NKX3-1_PROM1:5	AGTGAAAGCGGTGCGGGCC	GTGGAAAGGACGAAACACCGAGTGAAAGCGGTGCGGGCCGTTTTAGAGCTAGGCCAACATGAGGATCAC	chr8:23540438-23540457
NKX3-1_PROM1	NKX3-1_PROM1:6	CAGGGCTCGCAGATCGGCG	GTGGAAAGGACGAAACACCGCAGGGCTCGCAGATCGGCGGTTTTAGAGCTAGGCCAACATGAGGATCAC	chr8:23540566-23540585
NKX3-1_PROM1	NKX3-1_PROM1:7	GAAAACGGCTCAGGGCGGA	GTGGAAAGGACGAAACACCGGAAAACGGCTCAGGGCGGAGTTTTAGAGCTAGGCCAACATGAGGATCAC	chr8:23540693-23540712
NKX3-1_PROM1	NKX3-1_PROM1:8	GACCGTCAGAGCCAATTAC	GTGGAAAGGACGAAACACCGGACCGTCAGAGCCAATTACGTTTTAGAGCTAGGCCAACATGAGGATCAC	chr8:23540824-23540843
NR2F1_PROM1	NR2F1_PROM1:1	AGCTACCTACAGACTGGGA	GTGGAAAGGACGAAACACCGAGCTACCTACAGACTGGGAGTTTTAGAGCTAGGCCAACATGAGGATCAC	chr5:92918631-92918650
NR2F1_PROM1	NR2F1_PROM1:2	GGAGGGGCTCTCCAACCAA	GTGGAAAGGACGAAACACCGGGAGGGGCTCTCCAACCAAGTTTTAGAGCTAGGCCAACATGAGGATCAC	chr5:92918687-92918706
NR2F1_PROM1	NR2F1_PROM1:3	TTGACACGAGCTCCATATA	GTGGAAAGGACGAAACACCGTTGACACGAGCTCCATATAGTTTTAGAGCTAGGCCAACATGAGGATCAC	chr5:92918822-92918841
NR2F1_PROM1	NR2F1_PROM1:4	GAGCAATGTTTCCGAAAGG	GTGGAAAGGACGAAACACCGGAGCAATGTTTCCGAAAGGGTTTTAGAGCTAGGCCAACATGAGGATCAC	chr5:92918921-92918940
NR2F1_PROM1	NR2F1_PROM1:5	AACGATAAGAAGAATACGA	GTGGAAAGGACGAAACACCGAACGATAAGAAGAATACGAGTTTTAGAGCTAGGCCAACATGAGGATCAC	chr5:92919270-92919289
NR2F1_PROM1	NR2F1_PROM1:6	ACATTTTTGGGCGATCTCC	GTGGAAAGGACGAAACACCGACATTTTTGGGCGATCTCCGTTTTAGAGCTAGGCCAACATGAGGATCAC	chr5:92919371-92919390
NR2F1_PROM1	NR2F1_PROM1:7	TTATTTATTCGACCTACTT	GTGGAAAGGACGAAACACCGTTATTTATTCGACCTACTTGTTTTAGAGCTAGGCCAACATGAGGATCAC	chr5:92919466-92919485
RBM20_ENH1	RBM20_ENH1:1	AAAGGTTCAGGCTTTCAGT	GTGGAAAGGACGAAACACCGAAAGGTTCAGGCTTTCAGTGTTTTAGAGCTAGGCCAACATGAGGATCAC	chr10:112389347-112389366
RBM20_ENH1	RBM20_ENH1:2	TAGGCATTATGCACATTTT	GTGGAAAGGACGAAACACCGTAGGCATTATGCACATTTTGTTTTAGAGCTAGGCCAACATGAGGATCAC	chr10:112389455-112389474
RBM20_ENH1	RBM20_ENH1:3	ACTCTACATAATACAAGAT	GTGGAAAGGACGAAACACCGACTCTACATAATACAAGATGTTTTAGAGCTAGGCCAACATGAGGATCAC	chr10:112389473-112389492
RBM20_ENH1	RBM20_ENH1:4	TGTTTCATTCATGCTGCAT	GTGGAAAGGACGAAACACCGTGTTTCATTCATGCTGCATGTTTTAGAGCTAGGCCAACATGAGGATCAC	chr10:112389575-112389594
RBM20_ENH1	RBM20_ENH1:5	AAGTTGACACTGTGCCAAC	GTGGAAAGGACGAAACACCGAAGTTGACACTGTGCCAACGTTTTAGAGCTAGGCCAACATGAGGATCAC	chr10:112389598-112389617
RBM20_ENH1	RBM20_ENH1:6	CATGCTAAATGTAAACAGT	GTGGAAAGGACGAAACACCGCATGCTAAATGTAAACAGTGTTTTAGAGCTAGGCCAACATGAGGATCAC	chr10:112389671-112389690
RBM20_ENH1	RBM20_ENH1:7	GAGTGGGTAGAACACACAG	GTGGAAAGGACGAAACACCGGAGTGGGTAGAACACACAGGTTTTAGAGCTAGGCCAACATGAGGATCAC	chr10:112389731-112389750
RBM20_ENH1	RBM20_ENH1:8	CAACTGATCAGCACCACGA	GTGGAAAGGACGAAACACCGCAACTGATCAGCACCACGAGTTTTAGAGCTAGGCCAACATGAGGATCAC	chr10:112389813-112389832
RBM20_PROM1	RBM20_PROM1:1	GGGCGGACCGAGCGCGCCC	GTGGAAAGGACGAAACACCGGGGCGGACCGAGCGCGCCCGTTTTAGAGCTAGGCCAACATGAGGATCAC	chr10:112403668-112403687
RBM20_PROM1	RBM20_PROM1:2	GACACACGCAGCCCGCGGT	GTGGAAAGGACGAAACACCGGACACACGCAGCCCGCGGTGTTTTAGAGCTAGGCCAACATGAGGATCAC	chr10:112403780-112403799
RBM20_PROM1	RBM20_PROM1:3	AACTCTGCCCGCCGACCCT	GTGGAAAGGACGAAACACCGAACTCTGCCCGCCGACCCTGTTTTAGAGCTAGGCCAACATGAGGATCAC	chr10:112403905-112403924
RBM20_PROM1	RBM20_PROM1:4	TGTCCTTCCCGGTGGCGCG	GTGGAAAGGACGAAACACCGTGTCCTTCCCGGTGGCGCGGTTTTAGAGCTAGGCCAACATGAGGATCAC	chr10:112404092-112404111
RBM20_PROM1	RBM20_PROM1:5	TCGCGGCGAGAGAGCTCAA	GTGGAAAGGACGAAACACCGTCGCGGCGAGAGAGCTCAAGTTTTAGAGCTAGGCCAACATGAGGATCAC	chr10:112404171-112404190
RBM20_PROM1	RBM20_PROM1:6	CCTGGTGCCCGGGCGTCCC	GTGGAAAGGACGAAACACCGCCTGGTGCCCGGGCGTCCCGTTTTAGAGCTAGGCCAACATGAGGATCAC	chr10:112404290-112404309
RBM20_PROM1	RBM20_PROM1:7	AGGGACCACGGGTGCGCCT	GTGGAAAGGACGAAACACCGAGGGACCACGGGTGCGCCTGTTTTAGAGCTAGGCCAACATGAGGATCAC	chr10:112404423-112404442
RBM20_PROM1	RBM20_PROM1:8	GACACCGACTCTGCCCAGA	GTGGAAAGGACGAAACACCGGACACCGACTCTGCCCAGAGTTTTAGAGCTAGGCCAACATGAGGATCAC	chr10:112404537-112404556
RXRA_ENH1	RXRA_ENH1:1	GAATGTCCCAGAGGCTCAG	GTGGAAAGGACGAAACACCGGAATGTCCCAGAGGCTCAGGTTTTAGAGCTAGGCCAACATGAGGATCAC	chr9:137198487-137198506
RXRA_ENH1	RXRA_ENH1:2	GGCTCCCAGAATGTCCCAG	GTGGAAAGGACGAAACACCGGGCTCCCAGAATGTCCCAGGTTTTAGAGCTAGGCCAACATGAGGATCAC	chr9:137198495-137198514
RXRA_ENH1	RXRA_ENH1:3	TGCTGGATAGGCCACGTGC	GTGGAAAGGACGAAACACCGTGCTGGATAGGCCACGTGCGTTTTAGAGCTAGGCCAACATGAGGATCAC	chr9:137198552-137198571
RXRA_ENH1	RXRA_ENH1:4	AGGGTTGTCTGCACGAGTC	GTGGAAAGGACGAAACACCGAGGGTTGTCTGCACGAGTCGTTTTAGAGCTAGGCCAACATGAGGATCAC	chr9:137198632-137198651
RXRA_ENH1	RXRA_ENH1:5	GTAAACGAGGCTCACTGGG	GTGGAAAGGACGAAACACCGGTAAACGAGGCTCACTGGGGTTTTAGAGCTAGGCCAACATGAGGATCAC	chr9:137198690-137198709
RXRA_ENH1	RXRA_ENH1:6	TTTCACAATTGCGTAGGTC	GTGGAAAGGACGAAACACCGTTTCACAATTGCGTAGGTCGTTTTAGAGCTAGGCCAACATGAGGATCAC	chr9:137198753-137198772
RXRA_ENH1	RXRA_ENH1:7	GTTCTGGTGCCGACTGTCA	GTGGAAAGGACGAAACACCGGTTCTGGTGCCGACTGTCAGTTTTAGAGCTAGGCCAACATGAGGATCAC	chr9:137198823-137198842
RXRA_ENH1	RXRA_ENH1:8	ACGGCACTTGTCCAGGAGG	GTGGAAAGGACGAAACACCGACGGCACTTGTCCAGGAGGGTTTTAGAGCTAGGCCAACATGAGGATCAC	chr9:137198871-137198890
RXRA_PROM1	RXRA_PROM1:1	GGCCGCGCAGACAATGGCC	GTGGAAAGGACGAAACACCGGGCCGCGCAGACAATGGCCGTTTTAGAGCTAGGCCAACATGAGGATCAC	chr9:137217819-137217838
RXRA_PROM1	RXRA_PROM1:2	GCGAGGAGGCGGCGTGGGA	GTGGAAAGGACGAAACACCGGCGAGGAGGCGGCGTGGGAGTTTTAGAGCTAGGCCAACATGAGGATCAC	chr9:137217982-137218001
RXRA_PROM1	RXRA_PROM1:3	CGGGCGGGCGGCGATCGCG	GTGGAAAGGACGAAACACCGCGGGCGGGCGGCGATCGCGGTTTTAGAGCTAGGCCAACATGAGGATCAC	chr9:137218065-137218084
RXRA_PROM1	RXRA_PROM1:4	CGCCGGCGGGGGGGTGGCG	GTGGAAAGGACGAAACACCGCGCCGGCGGGGGGGTGGCGGTTTTAGAGCTAGGCCAACATGAGGATCAC	chr9:137218193-137218212
RXRA_PROM1	RXRA_PROM1:5	GCAACAACTCGCCGCGCCG	GTGGAAAGGACGAAACACCGGCAACAACTCGCCGCGCCGGTTTTAGAGCTAGGCCAACATGAGGATCAC	chr9:137218324-137218343
RXRA_PROM1	RXRA_PROM1:6	CTAACTCATGCCCGGCCGG	GTGGAAAGGACGAAACACCGCTAACTCATGCCCGGCCGGGTTTTAGAGCTAGGCCAACATGAGGATCAC	chr9:137218450-137218469
RXRA_PROM1	RXRA_PROM1:7	CGCGCCGCCAACGCGCCCC	GTGGAAAGGACGAAACACCGCGCGCCGCCAACGCGCCCCGTTTTAGAGCTAGGCCAACATGAGGATCAC	chr9:137218572-137218591
RXRA_PROM1	RXRA_PROM1:8	GGCGGGTGGCAGGTTCGCC	GTGGAAAGGACGAAACACCGGGCGGGTGGCAGGTTCGCCGTTTTAGAGCTAGGCCAACATGAGGATCAC	chr9:137218738-137218757
SMAD4_PROM1	SMAD4_PROM1:1	GGTTGTAGGAGTTCACTTC	GTGGAAAGGACGAAACACCGGGTTGTAGGAGTTCACTTCGTTTTAGAGCTAGGCCAACATGAGGATCAC	chr18:48556139-48556158
SMAD4_PROM1	SMAD4_PROM1:2	GGAGAGCTCGGCGTAGAGT	GTGGAAAGGACGAAACACCGGGAGAGCTCGGCGTAGAGTGTTTTAGAGCTAGGCCAACATGAGGATCAC	chr18:48556296-48556315
SMAD4_PROM1	SMAD4_PROM1:3	AACGAGATGCCAATTTCCC	GTGGAAAGGACGAAACACCGAACGAGATGCCAATTTCCCGTTTTAGAGCTAGGCCAACATGAGGATCAC	chr18:48556339-48556358
SMAD4_PROM1	SMAD4_PROM1:4	CGTCACTCGGAGCGGGAGG	GTGGAAAGGACGAAACACCGCGTCACTCGGAGCGGGAGGGTTTTAGAGCTAGGCCAACATGAGGATCAC	chr18:48556482-48556501
SMAD4_PROM1	SMAD4_PROM1:5	CAGTGGCTTCTCGACAAGT	GTGGAAAGGACGAAACACCGCAGTGGCTTCTCGACAAGTGTTTTAGAGCTAGGCCAACATGAGGATCAC	chr18:48556587-48556606
SMAD4_PROM1	SMAD4_PROM1:6	GCCAGGCGCCCAGCGAGAG	GTGGAAAGGACGAAACACCGGCCAGGCGCCCAGCGAGAGGTTTTAGAGCTAGGCCAACATGAGGATCAC	chr18:48556765-48556784
SMAD4_PROM1	SMAD4_PROM1:7	GCGCTGAGGAGGGGCGGCC	GTGGAAAGGACGAAACACCGGCGCTGAGGAGGGGCGGCCGTTTTAGAGCTAGGCCAACATGAGGATCAC	chr18:48556848-48556867
SMAD4_PROM1	SMAD4_PROM1:8	GCGGTTACCTGGGCTCGGG	GTGGAAAGGACGAAACACCGGCGGTTACCTGGGCTCGGGGTTTTAGAGCTAGGCCAACATGAGGATCAC	chr18:48556982-48557001
SMAD6_ENH1	SMAD6_ENH1:1	CTCGGGTCCCCACCGATGC	GTGGAAAGGACGAAACACCGCTCGGGTCCCCACCGATGCGTTTTAGAGCTAGGCCAACATGAGGATCAC	chr15:66914239-66914258
SMAD6_ENH1	SMAD6_ENH1:2	CCCACCGATGCTGGCGGCC	GTGGAAAGGACGAAACACCGCCCACCGATGCTGGCGGCCGTTTTAGAGCTAGGCCAACATGAGGATCAC	chr15:66914247-66914266
SMAD6_ENH1	SMAD6_ENH1:3	CAACTCCCCGTCTGCGGAA	GTGGAAAGGACGAAACACCGCAACTCCCCGTCTGCGGAAGTTTTAGAGCTAGGCCAACATGAGGATCAC	chr15:66914303-66914322
SMAD6_ENH1	SMAD6_ENH1:4	ACCGGGTGACCGAGAGGTC	GTGGAAAGGACGAAACACCGACCGGGTGACCGAGAGGTCGTTTTAGAGCTAGGCCAACATGAGGATCAC	chr15:66914369-66914388
SMAD6_ENH1	SMAD6_ENH1:5	CCAGGCCCTCGTTTCACAG	GTGGAAAGGACGAAACACCGCCAGGCCCTCGTTTCACAGGTTTTAGAGCTAGGCCAACATGAGGATCAC	chr15:66914432-66914451
SMAD6_ENH1	SMAD6_ENH1:6	AGGGAAGCCCACGGCCGGG	GTGGAAAGGACGAAACACCGAGGGAAGCCCACGGCCGGGGTTTTAGAGCTAGGCCAACATGAGGATCAC	chr15:66914524-66914543
SMAD6_ENH1	SMAD6_ENH1:7	AGGGCGCCTCTATCTCCCG	GTGGAAAGGACGAAACACCGAGGGCGCCTCTATCTCCCGGTTTTAGAGCTAGGCCAACATGAGGATCAC	chr15:66914577-66914596
SMAD6_ENH1	SMAD6_ENH1:8	ATAACGCCCAGGGCTCGGG	GTGGAAAGGACGAAACACCGATAACGCCCAGGGCTCGGGGTTTTAGAGCTAGGCCAACATGAGGATCAC	chr15:66914624-66914643
SMAD6_ENH2	SMAD6_ENH2:1	CAGCAGGCATGCAAGCAGT	GTGGAAAGGACGAAACACCGCAGCAGGCATGCAAGCAGTGTTTTAGAGCTAGGCCAACATGAGGATCAC	chr15:66913562-66913581
SMAD6_ENH2	SMAD6_ENH2:2	CTTCCTGGAAAATCCTTTC	GTGGAAAGGACGAAACACCGCTTCCTGGAAAATCCTTTCGTTTTAGAGCTAGGCCAACATGAGGATCAC	chr15:66913653-66913672
SMAD6_ENH2	SMAD6_ENH2:3	ATAAAGAGTGAAGTCCTTG	GTGGAAAGGACGAAACACCGATAAAGAGTGAAGTCCTTGGTTTTAGAGCTAGGCCAACATGAGGATCAC	chr15:66913683-66913702
SMAD6_ENH2	SMAD6_ENH2:4	GCGGGCAAGCTGTGTGCAG	GTGGAAAGGACGAAACACCGGCGGGCAAGCTGTGTGCAGGTTTTAGAGCTAGGCCAACATGAGGATCAC	chr15:66913793-66913812
SMAD6_ENH2	SMAD6_ENH2:5	CACCTGCACGGGGATGAGG	GTGGAAAGGACGAAACACCGCACCTGCACGGGGATGAGGGTTTTAGAGCTAGGCCAACATGAGGATCAC	chr15:66913830-66913849
SMAD6_ENH2	SMAD6_ENH2:6	TCGCATTCAAAGCCTGTCC	GTGGAAAGGACGAAACACCGTCGCATTCAAAGCCTGTCCGTTTTAGAGCTAGGCCAACATGAGGATCAC	chr15:66913868-66913887
SMAD6_ENH2	SMAD6_ENH2:7	GGTGGGGTTCCGGAAATCC	GTGGAAAGGACGAAACACCGGGTGGGGTTCCGGAAATCCGTTTTAGAGCTAGGCCAACATGAGGATCAC	chr15:66913973-66913992
SMAD6_ENH2	SMAD6_ENH2:8	TCCTCGGAGAAACAGCTCT	GTGGAAAGGACGAAACACCGTCCTCGGAGAAACAGCTCTGTTTTAGAGCTAGGCCAACATGAGGATCAC	chr15:66913994-66914013
SMAD6_PROM1	SMAD6_PROM1:1	TGAGACTCGGACGCAAACG	GTGGAAAGGACGAAACACCGTGAGACTCGGACGCAAACGGTTTTAGAGCTAGGCCAACATGAGGATCAC	chr15:66994226-66994245
SMAD6_PROM1	SMAD6_PROM1:2	GCGAGCACACACGCGCGCG	GTGGAAAGGACGAAACACCGGCGAGCACACACGCGCGCGGTTTTAGAGCTAGGCCAACATGAGGATCAC	chr15:66994315-66994334
SMAD6_PROM1	SMAD6_PROM1:3	CAGGGCCGGAGGCTCCAAG	GTGGAAAGGACGAAACACCGCAGGGCCGGAGGCTCCAAGGTTTTAGAGCTAGGCCAACATGAGGATCAC	chr15:66994460-66994479
SMAD6_PROM1	SMAD6_PROM1:4	GCCGCCAAAGTGTCTAGAC	GTGGAAAGGACGAAACACCGGCCGCCAAAGTGTCTAGACGTTTTAGAGCTAGGCCAACATGAGGATCAC	chr15:66994550-66994569
SMAD6_PROM1	SMAD6_PROM1:5	GCCCGGCGGCTCTTTCTCT	GTGGAAAGGACGAAACACCGGCCCGGCGGCTCTTTCTCTGTTTTAGAGCTAGGCCAACATGAGGATCAC	chr15:66994693-66994712
SMAD6_PROM1	SMAD6_PROM1:6	GAAGCGTCCGAGGGCAGCG	GTGGAAAGGACGAAACACCGGAAGCGTCCGAGGGCAGCGGTTTTAGAGCTAGGCCAACATGAGGATCAC	chr15:66994805-66994824
SMAD6_PROM1	SMAD6_PROM1:7	ACTTGGAGCGAGTTTCTCC	GTGGAAAGGACGAAACACCGACTTGGAGCGAGTTTCTCCGTTTTAGAGCTAGGCCAACATGAGGATCAC	chr15:66994933-66994952
SMAD6_PROM1	SMAD6_PROM1:8	GCCTGCCTTTCGGATCCTG	GTGGAAAGGACGAAACACCGGCCTGCCTTTCGGATCCTGGTTTTAGAGCTAGGCCAACATGAGGATCAC	chr15:66995098-66995117
TBX5_PROM1	TBX5_PROM1:1	CTCCTAGCAGGGAAGCCGG	GTGGAAAGGACGAAACACCGCTCCTAGCAGGGAAGCCGGGTTTTAGAGCTAGGCCAACATGAGGATCAC	chr12:114843473-114843492
TBX5_PROM1	TBX5_PROM1:2	GCGGTAGGTGCGCCCTAGT	GTGGAAAGGACGAAACACCGGCGGTAGGTGCGCCCTAGTGTTTTAGAGCTAGGCCAACATGAGGATCAC	chr12:114843575-114843594
TBX5_PROM1	TBX5_PROM1:3	ATATGGTTGCCGGTGCTCT	GTGGAAAGGACGAAACACCGATATGGTTGCCGGTGCTCTGTTTTAGAGCTAGGCCAACATGAGGATCAC	chr12:114843706-114843725
TBX5_PROM1	TBX5_PROM1:4	TGACTCTTACCTCGAATCC	GTGGAAAGGACGAAACACCGTGACTCTTACCTCGAATCCGTTTTAGAGCTAGGCCAACATGAGGATCAC	chr12:114843831-114843850
TBX5_PROM1	TBX5_PROM1:5	GAGGGCGACAGAGTGCAGT	GTGGAAAGGACGAAACACCGGAGGGCGACAGAGTGCAGTGTTTTAGAGCTAGGCCAACATGAGGATCAC	chr12:114843974-114843993
TBX5_PROM1	TBX5_PROM1:6	AAATCATTTCAAACGCGGT	GTGGAAAGGACGAAACACCGAAATCATTTCAAACGCGGTGTTTTAGAGCTAGGCCAACATGAGGATCAC	chr12:114844186-114844205
TBX5_PROM1	TBX5_PROM1:7	CGGTGCAGAGAACCGAGTC	GTGGAAAGGACGAAACACCGCGGTGCAGAGAACCGAGTCGTTTTAGAGCTAGGCCAACATGAGGATCAC	chr12:114844241-114844260
TBX5_PROM1	TBX5_PROM1:8	AAGGCGAGCGCCGGCCAGG	GTGGAAAGGACGAAACACCGAAGGCGAGCGCCGGCCAGGGTTTTAGAGCTAGGCCAACATGAGGATCAC	chr12:114844353-114844372
TBX5_PROM2	TBX5_PROM2:1	ATTCAGCAAGACTAAGACG	GTGGAAAGGACGAAACACCGATTCAGCAAGACTAAGACGGTTTTAGAGCTAGGCCAACATGAGGATCAC	chr12:114845525-114845544
TBX5_PROM2	TBX5_PROM2:2	CTTTTGCGCTCCAAAGAAG	GTGGAAAGGACGAAACACCGCTTTTGCGCTCCAAAGAAGGTTTTAGAGCTAGGCCAACATGAGGATCAC	chr12:114845635-114845654
TBX5_PROM2	TBX5_PROM2:3	GCACGTACCTCCCAGCTCA	GTGGAAAGGACGAAACACCGGCACGTACCTCCCAGCTCAGTTTTAGAGCTAGGCCAACATGAGGATCAC	chr12:114845761-114845780
TBX5_PROM2	TBX5_PROM2:4	GTCCTATAGGTGCAGCGGC	GTGGAAAGGACGAAACACCGGTCCTATAGGTGCAGCGGCGTTTTAGAGCTAGGCCAACATGAGGATCAC	chr12:114845881-114845900
TBX5_PROM2	TBX5_PROM2:5	CCACAGGTTCCGGACGTCT	GTGGAAAGGACGAAACACCGCCACAGGTTCCGGACGTCTGTTTTAGAGCTAGGCCAACATGAGGATCAC	chr12:114846014-114846033
TBX5_PROM2	TBX5_PROM2:6	GGGAACTCTTCACGAAGGG	GTGGAAAGGACGAAACACCGGGGAACTCTTCACGAAGGGGTTTTAGAGCTAGGCCAACATGAGGATCAC	chr12:114846149-114846168
TBX5_PROM2	TBX5_PROM2:7	ATCCCCCGCGGAGGAGCTC	GTGGAAAGGACGAAACACCGATCCCCCGCGGAGGAGCTCGTTTTAGAGCTAGGCCAACATGAGGATCAC	chr12:114846278-114846297
TBX5_PROM2	TBX5_PROM2:8	AATAATTACTGGGTTGTCG	GTGGAAAGGACGAAACACCGAATAATTACTGGGTTGTCGGTTTTAGAGCTAGGCCAACATGAGGATCAC	chr12:114846381-114846400
TGFB1_ENH1	TGFB1_ENH1:1	AGCGGGATTCCTAGCTCCC	GTGGAAAGGACGAAACACCGAGCGGGATTCCTAGCTCCCGTTTTAGAGCTAGGCCAACATGAGGATCAC	chr19:41933090-41933109
TGFB1_ENH1	TGFB1_ENH1:2	CCCATGCTTTTTTACCTCT	GTGGAAAGGACGAAACACCGCCCATGCTTTTTTACCTCTGTTTTAGAGCTAGGCCAACATGAGGATCAC	chr19:41933173-41933192
TGFB1_ENH1	TGFB1_ENH1:3	CTGACCTGAGGCCGGCACC	GTGGAAAGGACGAAACACCGCTGACCTGAGGCCGGCACCGTTTTAGAGCTAGGCCAACATGAGGATCAC	chr19:41933215-41933234
TGFB1_ENH1	TGFB1_ENH1:4	CTGCCCAGCCAGTCCAGAG	GTGGAAAGGACGAAACACCGCTGCCCAGCCAGTCCAGAGGTTTTAGAGCTAGGCCAACATGAGGATCAC	chr19:41933300-41933319
TGFB1_ENH1	TGFB1_ENH1:5	CGGGAGCAGGGAGGGCCCC	GTGGAAAGGACGAAACACCGCGGGAGCAGGGAGGGCCCCGTTTTAGAGCTAGGCCAACATGAGGATCAC	chr19:41933339-41933358
TGFB1_ENH1	TGFB1_ENH1:6	AGGAGGCCGACCTGAGAGA	GTGGAAAGGACGAAACACCGAGGAGGCCGACCTGAGAGAGTTTTAGAGCTAGGCCAACATGAGGATCAC	chr19:41933416-41933435
TGFB1_ENH1	TGFB1_ENH1:7	ACAAGACGGGGGCTTTGTG	GTGGAAAGGACGAAACACCGACAAGACGGGGGCTTTGTGGTTTTAGAGCTAGGCCAACATGAGGATCAC	chr19:41933505-41933524
TGFB1_ENH1	TGFB1_ENH1:8	GCCTGGGAGGGGAGAACCA	GTGGAAAGGACGAAACACCGGCCTGGGAGGGGAGAACCAGTTTTAGAGCTAGGCCAACATGAGGATCAC	chr19:41933526-41933545
TGFB1_PROM1	TGFB1_PROM1:1	GCCGGGTCGGCGACTCCCG	GTGGAAAGGACGAAACACCGGCCGGGTCGGCGACTCCCGGTTTTAGAGCTAGGCCAACATGAGGATCAC	chr19:41859336-41859355
TGFB1_PROM1	TGFB1_PROM1:2	CGCTGCCCCGCGAGGAGGC	GTGGAAAGGACGAAACACCGCGCTGCCCCGCGAGGAGGCGTTTTAGAGCTAGGCCAACATGAGGATCAC	chr19:41859460-41859479
TGFB1_PROM1	TGFB1_PROM1:3	CGCCCCCGCCACTGCGGGG	GTGGAAAGGACGAAACACCGCGCCCCCGCCACTGCGGGGGTTTTAGAGCTAGGCCAACATGAGGATCAC	chr19:41859594-41859613
TGFB1_PROM1	TGFB1_PROM1:4	GCCGGGGGGGTGCCCCGGA	GTGGAAAGGACGAAACACCGGCCGGGGGGGTGCCCCGGAGTTTTAGAGCTAGGCCAACATGAGGATCAC	chr19:41859707-41859726
TGFB1_PROM1	TGFB1_PROM1:5	GGGGTTTTGAAGCCGCCCC	GTGGAAAGGACGAAACACCGGGGGTTTTGAAGCCGCCCCGTTTTAGAGCTAGGCCAACATGAGGATCAC	chr19:41859848-41859867
TGFB1_PROM1	TGFB1_PROM1:6	CGGCTCCGCCCCGCAAACA	GTGGAAAGGACGAAACACCGCGGCTCCGCCCCGCAAACAGTTTTAGAGCTAGGCCAACATGAGGATCAC	chr19:41860012-41860031
TGFB1_PROM1	TGFB1_PROM1:7	AAAGAGGACCAGGCGGAGA	GTGGAAAGGACGAAACACCGAAAGAGGACCAGGCGGAGAGTTTTAGAGCTAGGCCAACATGAGGATCAC	chr19:41860116-41860135
TGFB1_PROM1	TGFB1_PROM1:8	AAGAGGGTCTGTCAACATG	GTGGAAAGGACGAAACACCGAAGAGGGTCTGTCAACATGGTTTTAGAGCTAGGCCAACATGAGGATCAC	chr19:41860227-41860246
TNNT2_ENH2	TNNT2_ENH2:1	GTGTCATCCTTGTCCCTCC	GTGGAAAGGACGAAACACCGGTGTCATCCTTGTCCCTCCGTTTTAGAGCTAGGCCAACATGAGGATCAC	chr1:201395523-201395542
TNNT2_ENH2	TNNT2_ENH2:2	TTACAAGGCTTAGCTCCTC	GTGGAAAGGACGAAACACCGTTACAAGGCTTAGCTCCTCGTTTTAGAGCTAGGCCAACATGAGGATCAC	chr1:201395587-201395606
TNNT2_ENH2	TNNT2_ENH2:3	GGCTGACACCTGTCAGCCC	GTGGAAAGGACGAAACACCGGGCTGACACCTGTCAGCCCGTTTTAGAGCTAGGCCAACATGAGGATCAC	chr1:201395643-201395662
TNNT2_ENH2	TNNT2_ENH2:4	GGGCCGCCGGGAAGACAGA	GTGGAAAGGACGAAACACCGGGGCCGCCGGGAAGACAGAGTTTTAGAGCTAGGCCAACATGAGGATCAC	chr1:201395727-201395746
TNNT2_ENH2	TNNT2_ENH2:5	CGGGAGGGCCGGTGTCGGG	GTGGAAAGGACGAAACACCGCGGGAGGGCCGGTGTCGGGGTTTTAGAGCTAGGCCAACATGAGGATCAC	chr1:201395748-201395767
TNNT2_ENH2	TNNT2_ENH2:6	CCCCCTGTTAAGCCCATCG	GTGGAAAGGACGAAACACCGCCCCCTGTTAAGCCCATCGGTTTTAGAGCTAGGCCAACATGAGGATCAC	chr1:201395833-201395852
TNNT2_ENH2	TNNT2_ENH2:7	CTGAGGGGACTAGAGCAGA	GTGGAAAGGACGAAACACCGCTGAGGGGACTAGAGCAGAGTTTTAGAGCTAGGCCAACATGAGGATCAC	chr1:201395907-201395926
TNNT2_ENH2	TNNT2_ENH2:8	ATTTGTGGTGAAAAATTGA	GTGGAAAGGACGAAACACCGATTTGTGGTGAAAAATTGAGTTTTAGAGCTAGGCCAACATGAGGATCAC	chr1:201395955-201395974
TNNT2_ENH3	TNNT2_ENH3:1	ACGGCCTAGGGAGGCGCGG	GTGGAAAGGACGAAACACCGACGGCCTAGGGAGGCGCGGGTTTTAGAGCTAGGCCAACATGAGGATCAC	chr1:201438198-201438217
TNNT2_ENH3	TNNT2_ENH3:2	AGAGAACGGGCGGGCGGTG	GTGGAAAGGACGAAACACCGAGAGAACGGGCGGGCGGTGGTTTTAGAGCTAGGCCAACATGAGGATCAC	chr1:201438223-201438242
TNNT2_ENH3	TNNT2_ENH3:3	CGAGCGGCGGAACATGTAA	GTGGAAAGGACGAAACACCGCGAGCGGCGGAACATGTAAGTTTTAGAGCTAGGCCAACATGAGGATCAC	chr1:201438294-201438313
TNNT2_ENH3	TNNT2_ENH3:4	GCTGGTGCGCGGCGCGGAG	GTGGAAAGGACGAAACACCGGCTGGTGCGCGGCGCGGAGGTTTTAGAGCTAGGCCAACATGAGGATCAC	chr1:201438363-201438382
TNNT2_ENH3	TNNT2_ENH3:5	GAGGGCCGGGACTGAGAGG	GTGGAAAGGACGAAACACCGGAGGGCCGGGACTGAGAGGGTTTTAGAGCTAGGCCAACATGAGGATCAC	chr1:201438455-201438474
TNNT2_ENH3	TNNT2_ENH3:6	GCTGCCGTCTGCCGCTTCT	GTGGAAAGGACGAAACACCGGCTGCCGTCTGCCGCTTCTGTTTTAGAGCTAGGCCAACATGAGGATCAC	chr1:201438505-201438524
TNNT2_ENH3	TNNT2_ENH3:7	CCCCAGGCCTTGAATGAAG	GTGGAAAGGACGAAACACCGCCCCAGGCCTTGAATGAAGGTTTTAGAGCTAGGCCAACATGAGGATCAC	chr1:201438538-201438557
TNNT2_ENH3	TNNT2_ENH3:8	GCAGCGCGCTCTCCAATCG	GTGGAAAGGACGAAACACCGGCAGCGCGCTCTCCAATCGGTTTTAGAGCTAGGCCAACATGAGGATCAC	chr1:201438597-201438616
TNNT2_PROM1	TNNT2_PROM1:1	ATTGCTTGTTCCAGGCCGA	GTGGAAAGGACGAAACACCGATTGCTTGTTCCAGGCCGAGTTTTAGAGCTAGGCCAACATGAGGATCAC	chr1:201346334-201346353
TNNT2_PROM1	TNNT2_PROM1:2	TGCTCTATTGTACCAATCT	GTGGAAAGGACGAAACACCGTGCTCTATTGTACCAATCTGTTTTAGAGCTAGGCCAACATGAGGATCAC	chr1:201346560-201346579
TNNT2_PROM1	TNNT2_PROM1:3	GAGGACAGGTTGCCAGGTC	GTGGAAAGGACGAAACACCGGAGGACAGGTTGCCAGGTCGTTTTAGAGCTAGGCCAACATGAGGATCAC	chr1:201346588-201346607
TNNT2_PROM1	TNNT2_PROM1:4	AGACGCCTCCAGGATCTGT	GTGGAAAGGACGAAACACCGAGACGCCTCCAGGATCTGTGTTTTAGAGCTAGGCCAACATGAGGATCAC	chr1:201346769-201346788
TNNT2_PROM1	TNNT2_PROM1:5	TTTAAGCAGGCATGTGGGC	GTGGAAAGGACGAAACACCGTTTAAGCAGGCATGTGGGCGTTTTAGAGCTAGGCCAACATGAGGATCAC	chr1:201346833-201346852
TNNT2_PROM1	TNNT2_PROM1:6	CACGCCATATAAGCCCATG	GTGGAAAGGACGAAACACCGCACGCCATATAAGCCCATGGTTTTAGAGCTAGGCCAACATGAGGATCAC	chr1:201346991-201347010
TNNT2_PROM1	TNNT2_PROM1:7	CCAGCAACCCAGGCCTGGG	GTGGAAAGGACGAAACACCGCCAGCAACCCAGGCCTGGGGTTTTAGAGCTAGGCCAACATGAGGATCAC	chr1:201347119-201347138
TNNT2_PROM1	TNNT2_PROM1:8	CTCCACTTGAACTGATGCT	GTGGAAAGGACGAAACACCGCTCCACTTGAACTGATGCTGTTTTAGAGCTAGGCCAACATGAGGATCAC	chr1:201347243-201347262
ZIC2_PROM1	ZIC2_PROM1:1	CGGTTATTGTTCGGAGCCG	GTGGAAAGGACGAAACACCGCGGTTATTGTTCGGAGCCGGTTTTAGAGCTAGGCCAACATGAGGATCAC	chr13:100633551-100633570
ZIC2_PROM1	ZIC2_PROM1:2	CTCCACCTGACCGCGGCGG	GTGGAAAGGACGAAACACCGCTCCACCTGACCGCGGCGGGTTTTAGAGCTAGGCCAACATGAGGATCAC	chr13:100633670-100633689
ZIC2_PROM1	ZIC2_PROM1:3	GCATTCTACCGGCGCTGCT	GTGGAAAGGACGAAACACCGGCATTCTACCGGCGCTGCTGTTTTAGAGCTAGGCCAACATGAGGATCAC	chr13:100633787-100633806
ZIC2_PROM1	ZIC2_PROM1:4	TATTAAAGGAGCTGCGGCG	GTGGAAAGGACGAAACACCGTATTAAAGGAGCTGCGGCGGTTTTAGAGCTAGGCCAACATGAGGATCAC	chr13:100633994-100634013
ZIC2_PROM1	ZIC2_PROM1:5	GCGTAGCGAAGGCGCGGAG	GTGGAAAGGACGAAACACCGGCGTAGCGAAGGCGCGGAGGTTTTAGAGCTAGGCCAACATGAGGATCAC	chr13:100634101-100634120
ZIC2_PROM1	ZIC2_PROM1:6	GCGCAGGAGAGCGGCTCCC	GTGGAAAGGACGAAACACCGGCGCAGGAGAGCGGCTCCCGTTTTAGAGCTAGGCCAACATGAGGATCAC	chr13:100634164-100634183
ZIC2_PROM1	ZIC2_PROM1:7	GGCGCAGGGCTCGCAGGGG	GTGGAAAGGACGAAACACCGGGCGCAGGGCTCGCAGGGGGTTTTAGAGCTAGGCCAACATGAGGATCAC	chr13:100634281-100634300
ZIC2_PROM1	ZIC2_PROM1:8	GCGGCTGCCGCCGAGATGC	GTGGAAAGGACGAAACACCGGCGGCTGCCGCCGAGATGCGTTTTAGAGCTAGGCCAACATGAGGATCAC	chr13:100634405-100634424
POU5F1	POU5F1	TCTGTGGGGGACCTGCACTG		chr6:31170865-31170885

## Sheet: Targeted_Amplification_Probes
Sequence	Bait ID
GACGCGGTCCCGGAAGTTGACCGGGGTGCGGAGCTCCTGGGCTGCAGCTCCTGGAGTTTCCGAGGTTCGTGCGCGTCTGGTGGCGGCGGCGTGATGTTCTCGGCAGGAGCGGAGAGTTTG	ENSG00000242802|AP5Z1|1
CTCCACCAGGCCAGGGAGATCCAGGACGAGGAGCTGAAGAAGTTCTGTTCCCGGATCTGTAAACTGCTGCAGGCGGAGGACTTGGGGCCGGACACCCTCGACTCCCTGCAGAGGCTCTTC	ENSG00000242802|AP5Z1|2
CTCATCATCTCAGCCACGAAGTACAGCCGGAGGCTGGAGAAGACATGCGTAGACCTGCTGCAGGCCACCCTCGGCCTGCCTGCATGCCCCGAGCAGCTCCAGGTGCTTTGCGCCGCCATC	ENSG00000242802|AP5Z1|3
CTGCGAGAGATGTCCCCCTCTGACAGCCTCAGCCTGGCCTGGGACCACACGCAGAACAGCCGGCAGCTGAGCCTGGTGGCCTCCGTTCTCTTGGCCCAGGGTGACAGAAACGAGGAGGTC	ENSG00000242802|AP5Z1|4
AGAGCCGTGGGCCAGGGCGTGCTACGAGCGCTGGAGAGCCGGCAGCCTGAGGGACCCAGCCTCAGACACCTCCTCCCCGTCATGGCCAAGGTCGTGGTCCTCAGCCCGGGCACCCTCCAG	ENSG00000242802|AP5Z1|5
GAGGACCAGGCCACCCTGCTCAGCAAGCGGCTGGTCGACTGGCTGCGCTACGCCAGCCTCCAGCAAGGGCTCCCACACTCCGGCGGCTTCTTCTCCACGCCCAGGGCCCGGCAGCCGGGC	ENSG00000242802|AP5Z1|6
CCCGTCACCGAGGTGGACGGGGCGGTAGCCACAGACTTCTTCACGGTGCTCTCCAGCGGCCACCGCTTCACAGACGACCAGTGGCTGAACGTGCAGGCCTTCTCTATGCTGCGGGCGTGG	ENSG00000242802|AP5Z1|7
CTGCTGCACAGCGGCCCCGAGGGCCCGGGCACCCTGGACACAGATGACAGGTCAGAGCAGGAGGGCTCCACTCTGTCGGTGATCTCCGCCACCTCCTCTGCCGGCCGCCTGCTGCCGCCC	ENSG00000242802|AP5Z1|8
CGGGAGCGGCTTCGGGAGGTGGCCTTCGAGTACTGCCAGCGCCTCATTGAGCAAAGTAACCGACGAGCCCTGAGGAAGGGGGACTCCGACCTGCAGAAAGCTTGCCTGGTGGAGGCCGTG	ENSG00000242802|AP5Z1|9
CTGGTGCTGGACGTGCTGTGCCGGCAGGACCCGTCCTTCCTGTACCGAAGTCTCTCCTGCCTGAAGGCCCTGCACGGGCGGGTGCGCGGGGACCCGGCCTCTGTGCGGGTGCTGCTGCCC	ENSG00000242802|AP5Z1|10
CTCGCCCACTTCTTCCTGAGCCACGGGGAAGCGGCTGCAGTGGACTCGGAAGCCGTCTACCAGCACCTGTTCACCAGGATCCCGGTGGAGCAGTTCCACAGCCCCATGCTGGCCTTTGAA	ENSG00000242802|AP5Z1|11
TTCATCCAGTTCTGCAGGGACAACCTCCACCTGTTCAGCGGGCACCTCAGCACCCTCAGATTGAGCTTCCCCAACCTCTTTAAGTTCCTGGCCTGGAACAGCCCACCCCTCACCTCCGAG	ENSG00000242802|AP5Z1|12
TTTGTGGCGCTCCTCCCGGCCCTGGTGGACGCTGGCACAGCCCTGGAGATGCTGCACGCGCTGCTGGACCTGCCCTGCTTGACGGCGGTGCTGGACCTGCAGCTCAGGTCAGCACCGGCT	ENSG00000242802|AP5Z1|13
GCATCCGAGAGGCCACTCTGGGACACCTCTCTCAGGGCCCCCAGCTGCCTGGAGGCCTTCCGGGACCCGCAGTTCCAGGGTCTTTTCCAATACCTGCTGCGCCCCAAGGCCAGTGGCGCC	ENSG00000242802|AP5Z1|14
ACTGAGAGGTTGGCGCCACTCCACCAGCTGCTGCAGCCCATGGCCGGCTGTGCCCGCGTGGCCCAGTGTGCCCAGGCCGTGCCCACGCTGCTGCAGGCATTCTTCTCAGCAGTGACCCAG	ENSG00000242802|AP5Z1|15
GTGGCTGACGGGTCCCTGATCAACCAGCTGGCGCTGCTGCTCCTGGGCAGGAGCGACTCGCTCTACCCGGCCCCAGGGTACGCTGCCGGTGTGCACAGTGTGCTGAGTTCTCAGTTCCTG	ENSG00000242802|AP5Z1|16
GCCCTGTGTACGCTGAAACCCTCCCTGGTGGTGGAGCTGGCAAGAGACCTGCTGGAGTTCCTGGGCAGCGTGAATGGTCTCTGCAGCAGGGCGAGCCTCGTCACCAGCGTGGTGTGGGCC	ENSG00000242802|AP5Z1|17
ATCGGCGAGTACCTGTCGGTGACCTACGATCGGAGGTGCACCGTGGAGCAGATCAACAAGTTCTTCGAAGCCCTGGAGGCTCTGCTATTCGAGGTCACCCAGTGCCGCCCCTCTGCTGCC	ENSG00000242802|AP5Z1|18
CTGCCCAGGTGTCCCCCCCAGGTGGTCACCGTGCTGATGACCACGCTGACGAAGCTGGCCTCCCGGAGCCAAGATCTGATCCCCAGGGCCTCTTTATTGCTGTCAAAGATGAGGACCCTG	ENSG00000242802|AP5Z1|19
GCTCACAGTCCAGCCACCAGCTCCACGCACAGCGAGGAGGGCGCGGAAGCCATCCGTACCCGGGCCACAGAGCTGCTGACCCTGCTGAAGATGCCTAGCGTGGCCCAGTTTGTGCTCACA	ENSG00000242802|AP5Z1|20
CCCAGCACGGAGGTGTGCAGCCCCCGCTATCACCGCGATGCCAACACGGCCCTGCCCCTGGCCCTGCGCACGGTCAGCCGGCTGGTGGAGAGGGAGGCCGGCCTCATGCCAGGGTGAAGG	ENSG00000242802|AP5Z1|21
GACAGTGGCCAGGGACTTCGGTGCAGATTAAGAGCCTGGGCAGCCAGCTTGCTACTGAGGCCAGGCTGATAGGAGCTCAGGAGGGCGCGGGAGTCCTGGGAGAGGAGGCAAGGCCCACGG	ENSG00000242802|AP5Z1|22
TGGGCTTGGCACCCTCACAGACACGCGGGGCTGGCCCCCCTGCTCACCCTCTGGGCTTTGTCTCCGAGCCTTTTGCTCCCAGGCAACACTGAGCTGAGCTGAGGGGTGCCATGGAGCGGC	ENSG00000242802|AP5Z1|23
AGGCTTGAGGCCCTGTGGCTGGGTCGGGTGGAGGCTGCTGGGTCTGTTTCCTAGTCTTTTGTTTTTGGACAGTTGATGGGCAAGAAGAGCTGCAGTAAAAGTAAATCTCCTTTAATAAGC	ENSG00000242802|AP5Z1|24
GTCTGTATGAAGAGTGCGCGATCAGTTCCGTTACCTGCCCTGCACCCTGGGGAGAGGACCAGGGATGGGAACCCCTGGCAGCTGCTGCCAGTCCTGGAGGCTCAGCCCGGCGTGCCACTG	ENSG00000242802|AP5Z1|25
CTGCTACAGAAACCAGGTCATTTGTGCACAGCCCGGAAGGCAGCGGCGCGAGTTCCCGGGTGTGGTCACCGCTCTGGGTGGTGCGCTTGTCAATGCCCCTTTTGATGCCCTTGAATAGCC	ENSG00000242802|AP5Z1|26
TGAAGATGAAGGGGACCGGGGGAGGGTTGCAAGCGCCATGGCCTATGCAGGCTGCGGCCTCTGGCCATTCGGAGGGAAGGCCCCAGGGAGCCACCTGAGTGGAGCTCAGAACACTGGATT	ENSG00000242802|AP5Z1|27
CGCGCGAAGGGGAGGTGTCTGGGCGTGCGGCCCCAGCCCCGCCACCTTCCTGGGCCCTGTGGTCCCACCCTCCGGACTACCAAGGCACAGCTGTGTCGCACGTTCCGCCCGGTGCCTGGG	ENSG00000242802|AP5Z1|28
ACGGGCTCAGCCGCCAGGGGGCGCCGCCGCCCCGAGAGCCTCACGCCCCGCCCCCAGGCTCAAACTCTTCCCCCTCCCCACTCTGGCTCCGCCCCCGGTCTCCTCTTTTGCTCTGGCCCC	ENSG00000242802|AP5Z1|29
GCCCACCTCCCCTCCGGCCTCGGCCCCGCCCCCAATCCCCCATAGCTCTGCGACTAAGAAACCACAGGCTGAAGGCGACTGCAGGGTCCTGCCCCTTGCCCAGCCTCAGGACTATGGAGG	ENSG00000242802|AP5Z1|30
GGGCGAGTGACGCGCAAGGAACGGAGCAGGGGACACCGTGCGGGCTCAGGAGCTCCCCAGATGCCCGAGCCGAACCGCGGGGTCCTCACCGCCAGGTTCCAGCCCAGGAAGCGCTCGCCT	ENSG00000242802|AP5Z1|31
GCCCCACAGCCTGGGCCTTGGGTCGCGTTCCGAGCTCCAGGACGGCTGGTGTCCCCCGCGGCCTGCGATGACAGCCCAGGGCCGCTGAGCCGGGGCCGCAGGAAAGGCTGGCGCTGGCAG	ENSG00000242802|AP5Z1|32
GCGCTTCCGTCGGCAGCACTGTGTTTGTGTTTCCACGTGGAAACAGCAGCGCACGTGTACAACTGTGCATACCAAGGCGTGCGTGCCAGTGCGCGGGTCTCGGGATCACTTCCCAGTGCG	ENSG00000242802|AP5Z1|33
GTGCACGACCCCGCCTGCAGCAGTGGGTGTGGGGGCGCTGCTGGGCTCATCCCGAAGCTCAGAGAGCGTGGGGCTGCCCCTAGGCTCGGAATGAGTCTCCCACTGAGTCCGCAGCTCCCC	ENSG00000242802|AP5Z1|34
TCCTGCCCTGGGGCGGGGCTTCCCTGACCTGAAGGCGTCGGGGGTGTCCTGGCTCCCAGCTCCCAGGCACTCGTGGGGCCACCGCCCAGGCCAGCTGGTGCTAAGTCCGCAGCCTGTGCA	ENSG00000242802|AP5Z1|35
GCAGCGCCCGGCTTAGGACTGGGAGTGTGACTTGAAGGGCCGTCCCGCTCATCCAAGGGACAAGGAGGAGCTCATGGCCACAGGGCCTCGGAGGGCATGACCCCAGCCCAGGGAGGAGCA	ENSG00000242802|AP5Z1|36
ACCTTCAGGTGGCCTCCAGGAGGCAGCTGGGAAAAGGGCAAAGCTCACCAGCTCTCAACTTTTTTTTTAAATAAACTGAAATTTTAGAATAGTTTTTCAGATTTACAGAAAAGATGATAA	ENSG00000242802|AP5Z1|37
ATTTTAGAATAGTTTTTCAGATTTACAGAAAAGATGATAAACCTTAGAAACATTATATGCTAAGTGAAAGTGAGAAGTGACAGC	ENSG00000242802|AP5Z1|38
CGCGAGTTCCGGGTGGGCGTGGGCTCTGTGGGCCCCGCACTCGGAGCCGCCGGCTAGCCCCGCCAGCCTGGGCAGTGAGGGGCTTAGCACCTGGACCAGCAGCTGCTGTGCTCGATTTCT	ENSG00000242802|AP5Z1|39
CCCTCCCCTCCGTGGGTTCCTGCGCAGTCCGAGCCTCCCCAACGAGTGTTGCCACCTGCTCAGGGCACCCA	ENSG00000242802|AP5Z1|40
TTTGGAGCAGGGCACGGGACTGGCAGGCAGCTCTACCTGCAGCCCCTGTGCAGGATCCACTGGGTGAAAGCCAGCTGGGCTCCTGAG	ENSG00000242802|AP5Z1|41
CAGGGCACGGGACTGGCAGGCAGCTCTACCTGCAGCCCCTGTGCAGGATCCACTGGGTGA	ENSG00000242802|AP5Z1|42
ATGTGGGTGGGGCCAGATACAACCCACTCGGGTCCCCTTCCACACCGGGATGCTTTGTTTGTTCGCTCTTTGCAATAAATCTTGCTG	ENSG00000242802|AP5Z1|43
CCAGCGCTGGTGCCAGCCTTCTCCCCAGTGAGAACAGTTTCTCTGAGGCTGGCAGTCTTCTGTGTTCCTCTATCGGAGGGTGCAGCATACACCTACCACTCAGACGCTTCCCGGGTTTCT	ENSG00000242802|AP5Z1|44
CCCCTTCAGTGGCTTCGGCACCACCCCTAGCTGGGCCCTCAGCAGCCTCAGACCCTGCCACCCCCACCCACAGCCCCACACCCAGCCCCAGGCACTTCTCTCTGCTTCTCAAGAACATTC	ENSG00000242802|AP5Z1|45
CCGTCCTTCTTTCTGCCGAGCCTGTCCTCTTCAGGGTTAGCTCAGGTCCCTCTTCCCCGTCTTGTCCCCTGGGGTCCTTCTCTCCAAAGGCCTGATGCATGCAGGCCCATCCTGGTTCCA	ENSG00000242802|AP5Z1|46
CCCCCTCCTCGCTGCTCCTGACCCCTACACCGGGGACCCTCCTTCTTCCCCCCCCAACACCTGACCAGTCCTCCCCTGCAAAGCCACCTCTAGGACAGGGTGTGTCTGTCACCCTTGGCC	ENSG00000242802|AP5Z1|47
ACTTGCCAAGGGCAGCCCCTGCACCCTGGAGTGCCTCACCCGTCTTCACGCCCAGGCCTGGAGCCTCCCATGCCAAGCCCTTCCTGGCACCCGAGGTGCTGTGATATTAGGGACACCTGC	ENSG00000242802|AP5Z1|48
CCCAACCTCTTTAAGGTATATTTGGGCATCCCTGGGTGCCAGGGCAGGGGCATGGTAAGTCCCTGGGGCTCCTCCCCTCTTTCCAGCGGGGTTCAGGGCGAGTCCTGGCTGAGCATAGAG	ENSG00000242802|AP5Z1|49
CCCTGTGAGTCCCGGGCCTGGAATGCGGTGTGCAGGGTGAGGTGGGGATCTGGGGTGTCCCTGCAGCGTCACGTGATTGACGGTGCTGTCCAAGAACTCCCTTGTGGGTGTTTTGGAGAG	ENSG00000242802|AP5Z1|50
TTTTTGATGGATTGCTGTGCCAGATGTTGGTAATTTTTAAACTTTTAAATAGAGAAATAAACAGACTCTTTTTGCTGTGTCCCTAGCCCAGGAAACCTGAAAGTCTAGGAACCAGCACCT	ENSG00000242802|AP5Z1|51
TCCAAAGAATGTGCCATAGTGTGTGTGACTCACGAGCTGTCCGTGTCCCTGGGCGAGGGAGACCAAGTGCCGCTTCCCCAGCGTCCCAGCGTAGGACGCCTCGGAGCCCTTGGTGTCCTG	ENSG00000242802|AP5Z1|52
CCGGGACCCGCAGTTCCAGGGTCTTTTCCAATACCTGCTGCGCCCCAAGGCCAGTGGCGCCACTGAGAGGTACGGGGCCCTAGGGCCAGGGGGCCACCAGTGGCTCAGAGAGCCCGGCCA	ENSG00000242802|AP5Z1|53
CAGCCACTGGGGTGGGGCTCACTGCTCAGCCCTAGGCTGAGGCCAGGGTGCTTTGTGTCCCACACAAGGCTGCGTCCCCGTCATCACCATTATAGAGGCCCTGCTTCTGCACCACGGGTC	ENSG00000242802|AP5Z1|54
TGCCGGGGGCGGGGCCTGGTCTCAGCTCTCTCTGCTGCCCACATCAACCCTCATAAGCTTGGAGGTTGGCCCTGTGGGTGCTCCATTTTGCAGATGGACAAACCGAGCCTGAGCCCAGGA	ENSG00000242802|AP5Z1|55
AGCAGGAGGCCTGGGACCGGCCACAGGCCTCCTGCCCTCAGCCCACGCCAGCCTTTGTCCCGATGGCTTTACTGTCCCGGGTGTGCTGACGCCAGGGGTCTCCCCAAACCCAGGGGAGCA	ENSG00000242802|AP5Z1|56
GGAGGTCCCGAGAGGCGATGAGTGAGGATGGGAGCGGGCTCAGCTGTGCGAGAGGGAGCAGTGGCGACGTGGCCCCGGCCTGCAGTCACCAGGTCGGGGAGCGGGCAGCACTCACGGCCA	ENSG00000242802|AP5Z1|57
CGGGGAGGCCCGAGGGTTTGGGACGCTGCAGGATTCTGTTTTCTGAGAAAAGTCGGCCAGCATCCCAACAACCCAGGCATCTGTAGGATTCAACCTCACCTCCCCATGCCACCCCACCCA	ENSG00000242802|AP5Z1|58
GGAGCCGCGCGAACATGGCCGAAGTCGGCGAGGACAGCGGCGCCCGCGCCCTGCTCGCGCTGCGCTCGGCGCCCTGCAGC	ENSG00000164916|FOXK1|1
CCGCCGCCACCGCCGCTGCCTCCGGGCGCGATCGCGGGCGCGGGCTCCTCCGGGGGCTCCTCCGGGGTATCCGGGGACTC	ENSG00000164916|FOXK1|2
CCTGGTGGCCGCGGCGGCCGCCTCGGTACGGCAGAGCCCGGGGCCGGCGCTGGCGCGGCTGGAGGGCCGCGAGTTCGAGTTCCTCATGCGCCAGCCCAGCGTCACCATCGGCCGCAACTC	ENSG00000164916|FOXK1|3
TCCTCATGCGCCAGCCCAGCGTCACCATCGGCCGCAACTCGTCGCAGGGCTCGGTGGACTTGAGCATGGGCCTGTCCAGCTTCATCTCGCGGCGCCACCTGCAGCTCAGCTTCCAGGAGC	ENSG00000164916|FOXK1|4
CGCACTTCTACCTGCGCTGCCTCGGCAAGAACGGCGTCTTCGTGGACGGGGCCTTCCAGAGACGCGGCGCGCCCGCCCTGCAGCTGCCCAAGCAGTGTACCTTCCGGTTTCCCAGCACGG	ENSG00000164916|FOXK1|5
CCATCAAGATCCAGTTCACGTCGCTCTATCACAAAGAAGAGGCCCCAGCCTCCCCGCTGCGGCCACTGTACCCCCAGATCTCCCCTCTGAAGATCCACATCCCGGAGCCGGACCTCCGGA	ENSG00000164916|FOXK1|6
GCATGGTCAGCCCCGTCCCCTCCCCGACGGGCACCATCAGTGTCCCCAACTCCTGCCCAGCCAGTCCACGCGGTGCCGGCTCCTCCAGTTACCGCTTTGTGCAGAACGTGACCTCGGACC	ENSG00000164916|FOXK1|7
TGCAGCTGGCAGCAGAGTTTGCAGCAAAGGCCGCGTCGGAGCAGCAGGCAGACACGTCTGGAGGAGACAGCCCCAAGGATGAGTCAAAGCCGCCGTTCTCCTACGCGCAGCTGATCGTGC	ENSG00000164916|FOXK1|8
AGGCCATCTCCTCCGCCCAGGACCGGCAGCTGACCCTGAGCGGGATCTACGCCCACATCACCAAGCATTACCCCTACTACCGGACGGCCGACAAAGGCTGGCAGAATTCTATCCGGCACA	ENSG00000164916|FOXK1|9
ACCTCTCTTTGAACCGTTACTTTATCAAAGTCCCACGTTCCCAGGAGGAGCCTGGGAAGGGGTCCTTTTGGCGAATAGACCCTGCCTCTGAAGCCAAGCTCGTGGAACAGGCATTCCGGA	ENSG00000164916|FOXK1|10
AACGGAGGCAGAGGGGTGTCTCCTGCTTCCGCACCCCCTTCGGGCCTCTGTCCTCAAGGAGCGCTCCAGCTTCGCCCACACACCCCGGGCTGATGTCCCCTCGCTCCGGCGGCCTGCAGA	ENSG00000164916|FOXK1|11
CCCCAGAGTGCCTGTCTCGGGAGGGCTCCCCCATTCCACACGACCCTGAGTTTGGGTCCAAGTTAGCTTCTGTCCCAGAGTACCGGTATTCCCAAAGCGCACCCGGCTCCCCCGTCAGCG	ENSG00000164916|FOXK1|12
CCCAGCCAGTGATCATGGCCGTGCCTCCCCGACCGTCCAGCCTCGTGGCCAAGCCCGTGGCCTACATGCCCGCCTCCATCGTAACCTCACAGCAGCCCGCGGGCCACGCCATCCACGTCG	ENSG00000164916|FOXK1|13
TGCAGCAGGCCCCCACCGTCACCATGGTCAGGGTGGTCACCACATCTGCCAACTCGGCCAACGGATACATCCTCACCAGCCAGGGCGCGGCGGGGGGCTCCCATGATGCGGCGGGCGCAG	ENSG00000164916|FOXK1|14
CCGTGCTGGACCTGGGCAGCGAGGCCAGAGGCCTGGAGGAGAAACCCACCATTGCGTTTGCCACAATCCCCGCGGCTGGTGGAGTCATCCAGACGGTGGCCAGCCAGATGGCCCCCGGGG	ENSG00000164916|FOXK1|15
TCCCCGGACACACGGTCACCATCCTGCAGCCCGCCACACCCGTGACCCTCGGGCAGCACCACCTTCCAGTCCGGGCCGTGACCCAGAACGGAAAGCATGCGGTTCCCACGAACAGTTTAG	ENSG00000164916|FOXK1|16
CCGGCAACGCTTACGCCCTCACCAGCCCTTTGCAGCTCCTTGCGACCCAAGCGAGTTCATCCGCGCCGGTGGTGGTCACCCGGGTGTGCGAGGTGGGGCCCAAGGAGCCAGCAGCAGCCG	ENSG00000164916|FOXK1|17
TCGCGGCCACGGCCACCACCACCCCAGCCACTGCCACCACCGCCTCTGCCTCCGCCTCTTCCACTGGAGAGCCCGAGGTCAAAAGGTCCCGGGTGGAGGAGCCCAGTGGTGCTGTAACCA	ENSG00000164916|FOXK1|18
CACCGGCTGGAGTGATCGCAGCTGCCGGCCCCCAGGGGCCAGGCACCGGGGAGTGAGGTCACCTGCAACGCGGGGGAGTGGGACTCACCCAGCGGCGACCCCGAAGCTGGACCCGGCAGC	ENSG00000164916|FOXK1|19
TCAGGCGGCCGCACCCACAGACGGAGGAGAACAGCCCGCGGCGGCCTGTGGGCATCGGCGGCACCTGGACACACCCAGCCCTTTCCATTTGATCGCCTGCCTTCCCGTGGTTTAAGACAA	ENSG00000164916|FOXK1|20
AAACACATAAACAAGTTCAGACAACTGATTGTATGATTCTGGGAATTCTTTGCTTTCCTTTCCTTCTCCCTCGGCACCACCTCCTCTCCCCAGGCCTCCCTGTCGGGCATGGGGAGGAGG	ENSG00000164916|FOXK1|21
TTGGAGCTCAGCATCTTGAGGAATGTGTCAAGACAGCCCCTCCGCTCCGCGCTGCACGGCCAGCCGCCTTTGTCCGGGAGGACAGACAGAAACGCAGCAAGGCACACACCAAGGCTGCCG	ENSG00000164916|FOXK1|22
GGGAGGCCCGGGCACCGGACAGATGCCTGTTGGGAAGCCAGGAGCTGCCGAGCCACGGACCACCTAACAGCCTCTCCGCCCGGAACGTGACATAGAGAGTGTTGGCATTAACTCGGGGGG	ENSG00000164916|FOXK1|23
TGTCCGATTTCACTTCAGACCCCAAGTTTTTCTTTGTTTGTTTAAACATGGAATTCAGACTTCATTGTACACCTGAGACAGACACAAAAGGGATCATGTATTTTTGAGGATTTTACCTGT	ENSG00000164916|FOXK1|24
TGACGTCTGATGACCGGCCGTAGGTCCAGGGTTCCCGCTGGGTTTAATCCCCTCGAAGAGTAAACCTGCCGCTCTGTCTGATAACTTCAAGTAAGAGCAGCGGCTTCCTGGGTTGGCGTT	ENSG00000164916|FOXK1|25
CGCGGTGGAAGGTTCCTAGGATGAAAGGTGAGCCTGGATCCGCCGGCCGCAGACATCGCGCTGCTGGGGACGATTGGGGCCGCTGCTCTGCAGACCAGACCTTCCCGAATTATCCGTGGC	ENSG00000164916|FOXK1|26
TCCGATGTCCCGGTGCTGACGGCCACATGGGGACCTAACAGTGCCAAACGCCATCTGCTCCAGCTGCTTTTTCACCCAGTTGCAGAGTCCTCACCACTCCCACATTGATCTGCTGTTTTC	ENSG00000164916|FOXK1|27
AATTGGAACCATTTCTCCTGCCTGAAACTCCAGGGCCCCTCCCTGGGCTGTCCGTGAGCAGGAGACCCCACCCCAGCAGCAGTGGTGAGCAGGCCTGTGCCTCCACGCCCAGCCCCCGCC	ENSG00000164916|FOXK1|28
AACGCGACTGGTTTTGTTTGCCACACGGTGAGAACCGGAGGACGGGATGCTCCAGCCAGTTGGGTGGTTCTGGGGTCCCTGAGGAAGCCCCCTCCTGCACTTCCATTAAGACAGCCAGTG	ENSG00000164916|FOXK1|29
GTTCCTGGATCTTTGTCACCAAGCAGCGTTGAGCCAGAGCTGTCTAATGCTGAGCCCAGCTCAGGAAGGAGAGAGGAGTCCTTCAGTGTGTCTTGGAGATGCGAAGTGCGTCCTCGTAAA	ENSG00000164916|FOXK1|30
GGTCAGCTGTCAGTTTTGCTGGCCGCTCCGGCGCTGGCTCTCCTGTCCGGGACCACAACGAGAAACAGCGACAGATTCGACGCAGAGCTCCGGAAGTGCCTGAGGAGCAGTGGTTCTTGG	ENSG00000164916|FOXK1|31
AAATCGCCCGTCCTCCGCATCACAGCCTCTCACCAGCAAAGCAGCCTCTGCCCAGGCCCTGGCGGGAGAGCTGCAGAGGGACCCAGGTGCCTGGAGGGCATTTGAGGGAGGTGGCTGGAC	ENSG00000164916|FOXK1|32
AGGTGTCTCCCTGAAGAAGAAGGGAGAACACTTTTCAAAGTGATTCCGAGGCAGTGCGGGAGGACACACGTGCTGTGCAGTGGAGTGGGGTCGCCCGTGGCCCCCATCAGAGTCCCCGTC	ENSG00000164916|FOXK1|33
CCCCAGGACAAGTGCAGAACCTCTGTGGGCCCCCTCCTTCCACCTAGATAGAGAAAACCCCTTGTTCGGTTTCCTTCCCGTGTCCCGTTGTTTTTCTAAGCCCCCCGAATTGAGTCGTTT	ENSG00000164916|FOXK1|34
CTATGGCACTAACCTTTCCATGGGAAATAAGCTCTTTGTGGAAGTCCGTACCTGTTGCCCTGGGTGAGGTTTCAGAGAAACGGGGGCAGGATGAACACAGCCGGCTGTCCTGGGTGCAGT	ENSG00000164916|FOXK1|35
TACGTCCGTGGAGGGTGAGAGATTGCGCCCCGTTCCACACTTGTGTCGCCTGCTGTTGTCTGTGGGCCTTTTCTTTCCGTGGTGCCTGGTGTGTGCGTGCATGGCGTGAGAGAACGGGGG	ENSG00000164916|FOXK1|36
GTGGGGGTTGGAGGTGGCTCCCCGACACCGGTGCCTGTGTGGCCTGAGCCGGCGCCCTCCCGGGAGCGCCCGTCACGGGGGGCCTCTGTGATTACCTGCTGCTGCTCTCTCCCGCGTGGT	ENSG00000164916|FOXK1|37
GACTATATGTCCTCAGGGCTGCCTGTGGCCACCCTGATGGGAGACCTCTGTTTGCTTCTGGGCCACTGCAGGTTGGCCTCCTCAATACAAGCTGATGTCTGCAGGGAGCGCCGCGTGCTG	ENSG00000164916|FOXK1|38
GGATTGCACCACGTGTTGGTCACAAATCGAGGTCGCCTTTTGGCCTGGTCTGCTCAGGCTGGCCCTGACCCACGTGGTTTCCTGGCTTCTGAGACGCAGCGCATTCTTCCTGTTAGCGGT	ENSG00000164916|FOXK1|39
AGCGTTCTCTGATTTCACTGCTTCATTGCCAAGGGCGTGGAAAGGGGGTGGTGGATGGAGCCGGGAGGTGGCGAGCACAGGACCCCGGGGCTGCATTCTGCCGTGTGGGGTTCTGCACTG	ENSG00000164916|FOXK1|40
TCTAGCTTCTGCGGGGACTGCAAAGAGGGATGAAGGGACGTGGTCCTAGGGGTCGGCTCAGACTCGGAGCAGGGCAGGGAGAGGAGGGCAAGGAGAGGAGGCCTGGGTCCTGGATCCACT	ENSG00000164916|FOXK1|41
GCTCTGGGCTCATAACCATGAGATTTTGAAAGAGTTTTTGGTCATCTGAGCAGGTACCATGCCTGGCTCATGCCGGAACTTGTCTTGGAACCGGTAGCCAGAGGCCCAGGAAGGGACAGG	ENSG00000164916|FOXK1|42
GCCCAAAAGGGTTGCATGTCCCGGCCACAAAGCCCTCCCTGTGTGCCCTGAGCCAGCCCAGCAAGCGCCTCCCAGCCAGGCGCTTTCGCAGAAGCAAGAGCACAGGCCAGGGGGACCGGG	ENSG00000164916|FOXK1|43
AGAGCCTCAGCCCCCAGCCTGGGCGGCCTGTGACCCTGAGCCGTGTGGAGCCAGGACCCAAGAACCTTCTCTAGGTTCTCAAGGGTGAGCTGACCCGGGCAATGTGCAGGAATGTGGGGA	ENSG00000164916|FOXK1|44
GCAAAAGTAGCTGATTCCAGCCCCGTTCTGGGGTCACTGGGGAGGCAGAGGCTGAGGGCCTGTTCTCTGGTCACCAGGGACTGGGGGCACGGTCCACAGCGGATGAGAACAGCAGGTCAC	ENSG00000164916|FOXK1|45
AGTAGTGGCTTTGGGAAGGGCCCCTCCTGCTTTGCCCTGTTCGGAAAGGGGCTCCCTCAGAGCCCCTGGGCCCAGTAACCCGCTTCTGTCTCCTGACTCCTGCTGGATAAATTGCCAGGT	ENSG00000164916|FOXK1|46
GAGGTAAGTCCCAAAAAGAACGTCTTAAGTAGAGCAAAGGCATCCACCGAGGCCATTTGGTGGCCCCTGGGAAGTGGGGAAGCAGGGCCTGAGCGTCCCCAGGCTGCTAGGGCAGCAGCT	ENSG00000164916|FOXK1|47
GGCTCAGGGCACACTCTCTCGTGCCAGCTTCTGCCACCAGCCCAGTGTCCACGGAGCCGCGGGGCCAGAGGAGCTCAGGGAGACCTGGCTGTCTAGGGCATGGTACCCAGTATCCCGGTG	ENSG00000164916|FOXK1|48
TGTGCCCATCCTCAGCCACTTGTGTCTTTCTTTCCATGTGGGAGTTCTCCCGGTGACACCTGCCCTCCGTTGAGGGTGGAATCTGTCACTCATGCCTTTGAGGGACCCAGATGGACCATC	ENSG00000164916|FOXK1|49
CCTCTTCTGCTTGCTTTCTACATTCCTAAAAACCTCAACGTTAATCCCTCACCAGTCGGGCCGAGTGTGGCCTCATGGTTCTGCCGCGGCCCAGTCTTCTCCCACTGGCTTCACGCTAGA	ENSG00000164916|FOXK1|50
GGGCGCCATGCGCTCTGGGTGAAATGAGACGCTGGTGTGGGGTCCCCATGTAGAGACCCTCAGGTCCCTATCCAGAGACCCTCCAGGCAGTGCTGGGAAGACACTGGTGGCGGGGACCAT	ENSG00000164916|FOXK1|51
GACCAGGCGGGTGGAGCCATGTGTGTCTCACACCTGCCGCCCCTCACTTTCCTTCCCGAGGTCTGGTAGGTCCTCTTTGGGATTTGCTGTTTATTTGTATCTCCCTTTTCTTTGATTTAA	ENSG00000164916|FOXK1|52
GAACAATGCCAAGTGAAAAAGCTGGGAATGAATTTCTGAGTTGCTGAGTGTTCCCTGCTCCTAGGTACCACGCTCTGTGCTTCTCAGGCAGGGAGGAGATGGATTCGGTGGAGTTGGGCC	ENSG00000164916|FOXK1|53
AGGACGGGGGCTTCACCCTGCCCCCTCCAGACTGCCGAAGCCCCCAAGAAGTTTTGAGCCCAGCTGGGCCTCGCCTCCCCGGCTCCTGGGTCCATTTTCTGTACTGGTTTGAGATCACAG	ENSG00000164916|FOXK1|54
GCATCATTCAGCGAATGCTCTTGTGTCCTCTGCATAAAGAGGGCCCTCCCTGGAGCACCCCCGGGGAGCTGGGACTCTCCAGAAAGCCCCGGGTGAGGGCTCCGTCTTGAGAGAGAGAGA	ENSG00000164916|FOXK1|55
AATCCCTTCTTTGGGCGATTCAGTGAGTTCAGGAGGAGGAGGAAGCTTTTCCTTGGCTTTGAAATCAGTGTTTTTATGGAGACAAAGAACAGACCTCAGTGGGAAAAATGAAAACGTAAT	ENSG00000164916|FOXK1|56
GGAACACGGGGAGGTGTCGGAGAAGAAAGGATTTTCCCCTTCGCTTTCAGAGCCGGCGGGAGTGCAGGTCTGTTTTGCTTCAGAAGCCTCACATTCTGCTTTGCCCTTGAGTGACTTCAT	ENSG00000164916|FOXK1|57
GCGGGATGAGGAACTGTTGACCCCTCTAGAGAGGACACCCCAAGTCCATCCTGGGCTCCTCCTCACCCCTCTGAGAAAGCCCCCCTAAAAAAAGGCTTCAGAGTCACCGGCATGCCGCCT	ENSG00000164916|FOXK1|58
CACGTTGCAGGACGGAATCGCGCGCTCCTCACGCTGGAGTAAGTTACGAAACATGATCGTCAGGCTCTTTGCAAACGCAGAGCCCCAGAACGCTGGATGGAGGCCTCCTCGGCCCTGCGG	ENSG00000164916|FOXK1|59
GCGGCCTGGCTGCGGTAGGTCTGCTGCAAGGAGCCACCACGGGGACTGCGCCACACTCCTGATGAAAACGTGTTTACCCACAGCCTCGCCTCGAGCCTCCTTGACAATACCGCTGCTTCA	ENSG00000164916|FOXK1|60
AAGCAATATTATTTAATGAGAATACTTTACATTGCTCACATGTGCTGCTATGAAGACAGGATTAGTCTGTAGACGGGACTCAGCTCCAGAGGTTCCTGGGTAATGTATTGTGGCTCTTGG	ENSG00000164916|FOXK1|61
AAATGAGGGTAGAATTTGAAATATAACAAATGGTCTCTCGCCCGGTTCTGTCCCTTATTTTTAGATTGTTTTCCTGCATCTTACAATTTCCTTTTCTTTTCAAAGTTCCTTTCTCCAGGC	ENSG00000164916|FOXK1|62
CTGTTTTTCAGTGCTCAGGACACGGTTTTCATCACATACTTACTGTTTTTTTGGTTGGGTTTTGATACGAAAAGCTGCTACGTTTGGTGACCAGAGGGAGGGTTTGGAATCTGTGCTTTG	ENSG00000164916|FOXK1|63
CAGGGGATCTCGGTGGGTACCGCGGCCCCTCGCAGGGTGGCGAGTGGGGTCCGTGCCTCGAGAAGGGGGCCCTTACCCACACCGTGCGGCTTGAATTCTGTCGGAGTTGAATCTGTGGAA	ENSG00000164916|FOXK1|64
AGGATTGTCCCATTAGAGCTGCTGCGTCCTTTCCTCTGTCCTCCCTGTCACCCAAACCCCGAAGTCACAGCTGCTTAGAAGAATGGGATTTTGGGGATACAACCACACACATTTCCCTCT	ENSG00000164916|FOXK1|65
GAATGGGATTTTGGGGATACAACCACACACATTTCCCTCTGGACTGAAATTTTAAAAACAGACCCATTTCA	ENSG00000164916|FOXK1|66
TTAGGGAAAATAGTTTCAGTCTTGGGTTGTCTTGTGAGCCCACGGGCATGGGACCCTGTCTCTGCTGGGCTTTTCCGGCCCCGTCCCAGCTCCTCCTCAGGCAGAGGCTGCAGCCCTCAG	ENSG00000164916|FOXK1|67
CTCTGCTGCTGGATGGAACATTTCAACCCCCTCCGGGAAGGTGGGCAGGGTGGAGGGCCCAGGGCTAGGCCTGCCATGCACCATGAGCAGGGGTGCTACCTGGGTGTGTGAAGTTGGGCT	ENSG00000164916|FOXK1|68
GGCTTTTCCTGGAGGTGGGTGAGAAGGCTCTCCGGGCAAATCAGAAGGCCACGAGAGAGAGAGGAGCGGGGAGAGTGGTGAGGAGGATTCGTCTCTGACTGATGAACCTCGCCGTGCCTG	ENSG00000164916|FOXK1|69
TCTGTCACATCCAAGTCTGTGCCAGCTGCTGGGAGGTCAGACTCCTGCCCTGAGAAACAGCCCAGTCCTTGGAGAATGAAACCCTGAGGGTCAGTGAGTGGAGGCCTTCCCTCGGGGCCA	ENSG00000164916|FOXK1|70
GCCATTCCCGGGAGGCCTGAGTGTGACCTGGAAGCTCTGTGGGTCACCAAGACTGGCATTTTCCTTGTATTTTTGTGCAGGGCTGAAGTGAGCGTTCCTCCTCTGAATTGGTGAGGCTTT	ENSG00000164916|FOXK1|71
GGAAATTTTTTGTTTCTTCTACTCATCCTAATGGCTGGTTTTGGCTGCCCGGAGTATCAGAGAATATCACTAAGAGGGCAGTCAGTTTATTTTTAGGCATCTTTCTTTCTGTCCAGGGAG	ENSG00000164916|FOXK1|72
AAACCCCTCGGAAGAATCTTAGTCACTCTTTGCACCTGCCCTGTCATTCTCGCCATGGGGAAAATGCGTTGAAAAGAAAAATACCGGGGCCAGGGAGAAGCCGTGAATGTATTTATTTGC	ENSG00000164916|FOXK1|73
TTTGGTGAAGCTGCTGAACACTGGCTGCGGAGGGCCCCCCGCCCCCATCCCGCTTCAGGCCCCAGTGACCCAGTTGCGTCTTAAGTTCCATCGTCCAGATTTCAGGCCACCAGAGGCTGC	ENSG00000164916|FOXK1|74
TTAAGTTCCATCGTCCAGATTTCAGGCCACCAGAGGCTGCCAAAGGTGACTGAAGCGGTCTCCAAGTCACTCTGTCACCA	ENSG00000164916|FOXK1|75
TTTGTTTTTTGTTGTTTTGTTTTGTTTTAGCGTGATACTACAATGGAAAGACTCCTAGTTGGTTATTCTTTATCTCGGATTCTTTTTTCTGGAATTGTTTGCTCATTTGAGTGGTTGGTG	ENSG00000164916|FOXK1|76
GGTTGGTGGTTTGCCCTGTGTCAGACACGGTGAAAAGAGTGCAGGAAAGCTGGGGCCAGGGGAAGCGAAGTGGCTTCAATCCGGGCTGACAGCCAAGAAGAGTTTTCCTCCCTTCGGTGA	ENSG00000164916|FOXK1|77
CAGGGCCTGCCCCTCCGAGTCTAGAGGTAAAAGCAGCTTCTAGAACTGGCCCCTAAGTCTCCAAATGTGTTGGCTAAGCTGAAATGAGAGACTCTGAATTAGAGTTTTTGTTTGTTTGTT	ENSG00000164916|FOXK1|78
TGTTCTCTGCATGAAGTTCACAGGCCTGTATGGATGTTAAATTGTGTCTATAGCCTCTAAATCTCCAGGTTAACTGGTCCAGATTTTTTTTTTTTAATCAGTAACAATGGGAATTTAAAA	ENSG00000164916|FOXK1|79
ACAGAGGGAGACTCTGTCTCAAAAATAATAATCAAATCAAGTATTTTAAGTTTGGCTCTTCTTTTTTTCAAGAAAGGCTTTTTGGATACCTAGAATACCTTCATGTATGTGGCTTGATTT	ENSG00000164916|FOXK1|80
GAATACCTTCATGTATGTGGCTTGATTTCTGTTTCAGGAAAAGGGGGGCGGGAGGAGAGACAACAGCCGTGTTCCAGAGTCTGTCCTGAGATGTCGCTGAGTCCAGACACTTGGGCTGCA	ENSG00000164916|FOXK1|81
CGTGCCCTGCAGATGACAAAGGCCGGCAGCTCAGCACACGTGCAGGAGGGGTTAAAGCCAATATTGAGTTTTTGTTCTTGTTGTTTTAATCTGAACGATTATTCTCCTGTAAAAATAATT	ENSG00000164916|FOXK1|82
ACAGTGGCGCCTGTCTAAAGTATTTTTCACAACATGTTTGATAATCAGTGCTTTAAAAAGCAGCAGTGTCCTATGAAGTGGAAATGTC	ENSG00000164916|FOXK1|83
TGCTTTAAAAAGCAGCAGTGTCCTATGAAGTGGAAATGTCAGTTCTAGAGCATTGGATGTGAAGTTCTGGTCATGTCACCTTGCGTGTCTCACCCTGGAGGAGTGAAGGTGGGCGCCCGG	ENSG00000164916|FOXK1|84
CGGGGGGGTGTGGCTGCACCCCAGCACCGGGAGGGGGCACGCACGACACCAGAGGAAGGGACAGCCCCACCCATGTCAACAGCAGGCAACCTGTGTTTTCATTTCAAGTGGGATACAGTA	ENSG00000164916|FOXK1|85
TTTTTTTAATAAGGAGCCATACTTTTTTTTAAGAGTTTGAGATCTGAATGTGATTTCTAATTGTATCAGACGTTAATGTTTTAAAGCTATAACAAAGTTTAAAATTTCTACTTTTTGTTT	ENSG00000164916|FOXK1|86
TTCATTTATTTTAACTGTTCTTTTATCTATTAAATTGTTGTATGTGGATGGGGAAGTTTTGTTTCTCCTCTTAGCATTTGTTTCTATAACCAGAAATAAAATTCTATATTAAAGAAATGA	ENSG00000164916|FOXK1|87
ACAGCCCAGGGCCTGCGGGCGTGTGCTCGAGGTGGTCTCAGCCCACAGGGAATGGAGCCGCAGCTGGCGGTAGAGCCGTCGGCCCTTTCTCGTTTTCGTGCCCAAATCATCCCCGTTGGT	ENSG00000164916|FOXK1|88
CATTTGCTGGTGACAGGGGTGGCGCCGTCACCGAGGGCCCCTCCCGCCACGCTCCTTGTTCATCTGCCGCTGGCAGCCCGGCGTCAAAGCCTTCATACAGCCCTTGAGCAGGATGGCGTT	ENSG00000164916|FOXK1|89
CTCCTTATAACTTTGTCTTAGTTCATTTTTGTCCAATAGCTGTTTTCAAATTGATTTCTGGAAGAGGTGAGAAATTTCAGAATTAAATTATAATAAAACCGAAGTTTTCCTTCCCATGAG	ENSG00000164916|FOXK1|90
TTCTTAGAAGTGGAAATGTGTGTAGCAATAGGAACGGTTCCTAAGGCCAAGAATAAATGGATTGCGGTTGTGGGTCTTTTGGTAGCACTAAGCTTTCTGTTGCAGTGTGTGAGAGGACCC	ENSG00000164916|FOXK1|91
GGGGAGAGCCCAATCTTCGAAGGGACAGATGAGGGGTATGACCTGGGGAGCCCACAACCGCCTTTGCTTTTCGCAGATGCTGGGAACGCAGCTCTGCTGCCGGCGGGGTGGACAGACCCT	ENSG00000164916|FOXK1|92
CCCCCAGCCATTGCTGCCCACCTGCTGCGTCAGGGCCTCCCCTGCCCAGCTCAGTCTTGGCCAAGCCCAGTCTGGAGGAGCATGCACCGCCTGTGAGCGGTCTGGGCAGCGCTTCCCAGG	ENSG00000164916|FOXK1|93
TTGCCCATCAGATGAGCCCGTCCCAGGTGTCGAGGAGGAGATCTCCTGAGCGGCAGTCTCGGAAATCCTTCCCCGTGGAAGGACACGTTAACCTCTCGTGCTTCCCATTTCAAAATTCTG	ENSG00000164916|FOXK1|94
TTTCCAACACGATTTGATGAAAGATTGAAATATCTGAAAATTCATTTCGAGCACAGGGTCTGGCATTGTGATTCTCAGGTGAACTGGGCGTATGGTTGAGGTAGGACTTCAAAAAAGTGT	ENSG00000164916|FOXK1|95
TCGAACGTCATTTGCAGCATTTAAACTGAGCTCCAAATGACGTTCAAACACCCCTCTCGGGTAGAGTTTTCATGGTGGAACGGTTGCGCCCACCAAACAGAAGCTTATGTTTTTGGCACA	ENSG00000164916|FOXK1|96
GAAGGCCTGGGCCATTTTCATGGACACCTGGCTGGACCTCGGTGGAAGTGAACTCCGTAGGTTGTTGCGTTCACTGCAGCACCTCACATGATACCGTCCCCTCTCATGGAACGGAGCCTC	ENSG00000164916|FOXK1|97
CCCCATGCAGCCCCCACTCAAATGGAGTTTTAAAGGCTGGGTTCAGGTTACGGGGGCGTTTCTCACCGTCTGAATGCGGAGGACAGAGACGAGCTCCAGGGAGCGTGGGCGGGTGACGGC	ENSG00000164916|FOXK1|98
GCGTGATGTCTCGGAAACGTCCTCGCATCCCTCAGCGCGGGCGCTGACTGCCGCGGCCCTTGCCTGTCTTCCAGGAGCGCTCCAGCTTCGCCCACACACCCCGGGCTGATGTCCCCTCGC	ENSG00000164916|FOXK1|99
CCATTGGCCTGGGCCTGGGGCTTGAGGAGGATGATTCTCTGCTTCTGCCTCTCGCTGCCTTGTCCCTTTAAATCAGCATGAGCTGGGCAGGTGGCTCATGCTTATAATCCCAGTGCTTTG	ENSG00000164916|FOXK1|100
AGCTGGGCAGGTGGCTCATGCTTATAATCCCAGTGCTTTGGGAGGCCAAAGCGGGTGGATTACTTGAGGTCCGGAGTTCGAGGTCAGG	ENSG00000164916|FOXK1|101
CCAGGCATGATGATGCGCCTGGAGGCAGAGGTTGCAGTGAGCTAGACTGCGCCACTGCACTCCAGCCTG	ENSG00000164916|FOXK1|102
GGCGCAGGGGCCGCGAGAGGCTTCGTCGCCGCTGCAGCTCCGGGGGCTCCCAGGGGAGCGTGCGCGGAACCTCCAGGCCCAGCAGGACCCCGGCTGCGGCGAGGAGGAAGGAGCCAGCCT	ENSG00000136574|GATA4|1
AGGAAGGAGCCAGCCTAGCAGCTTCTGCGCCTGTGGCCGCGGGTGTCCTGGAGGCCTCTCGGTGTGACGAGTGGGGGACCCGAAGGCTCGTGCGCCACCTCCAGGCCTGGACGCTGCCCT	ENSG00000136574|GATA4|2
CCGTCTTCTGCCCCCAATAGGTGCGCCGGACCTTCAGGCCCTGGGGTGAATTCAGCTGCTCCTACATCAGCTTCCGGAACCACCAAAAATTCAAATTGGGATTTTCCGGAGTAAACAAGA	ENSG00000136574|GATA4|3
GCCTAGAGCCCTTTGCTCAATGCTGGATTTAATACGTATATATTTTTAAGCGAGTTGGTTTTTTCCCCTTTGATTTTTGATCTTCGCGACAGTTCCTCCCACGCATATTATCGTTGTTGC	ENSG00000136574|GATA4|4
CGTCGTTTTCTCTCCCCGCGTGGCTCCTTGACCTGCGAGGGAGAGAGAGGACACCGAAGCCGGGAGCTCGCAGGGACCATGTATCAGAGCTTGGCCATGGCCGCCAACCACGGGCCGCCC	ENSG00000136574|GATA4|5
CCCGGTGCCTACGAGGCGGGCGGCCCCGGCGCCTTCATGCACGGCGCGGGCGCCGCGTCCTCGCCAGTCTACGTGCCCACACCGCGGGTGCCCTCCTCCGTGCTGGGCCTGTCCTACCTC	ENSG00000136574|GATA4|6
CAGCTCCGGTGGGGCCGCGTCTGGTGCGGGGCCCGGGACCCAGCAGGGCAGCCCGGGATGGAGCCAGGCGGGAGCCGACG	ENSG00000136574|GATA4|7
GACGGAGCCGCTTACACCCCGCCGCCGGTGTCGCCGCGCTTCTCCTTCCCGGGGACCACCGGGTCCCTGGCGGCCGCCGC	ENSG00000136574|GATA4|8
CAGTGGCGGCGGAGCGGCGGGTGCGGGCCTGGCGGGCCGCGAGCAGTACGGGCGCGCCGGCTTCGCGGGCTCCTACTCCAGCCCCTACCCGGCTTACATGGCCGACGTGGGCGCGTCCTG	ENSG00000136574|GATA4|9
GCAGCCGCCGCCGCCTCCGCCGGCCCCTTCGACAGCCCGGTCCTGCACAGCCTGCCCGGCCGGGCCAACCCGGCCGCCCGACACCCCAATCTCGATATGTTTGACGACTTCTCAGAAGGC	ENSG00000136574|GATA4|10
AGAGAGTGTGTCAACTGTGGGGCTATGTCCACCCCGCTCTGGAGGCGAGATGGGACGGGTCACTATCTGTGCAACGCCTGCGGCCTCTACCACAAGATGAACGGCATCAACCGGCCGCTC	ENSG00000136574|GATA4|11
ATCAAGCCTCAGCGCCGGCTGTCCGCCTCCCGCCGAGTGGGCCTCTCCTGTGCCAACTGCCAGACCACCACCACCACGCTGTGGCGCCGCAATGCGGAGGGCGAGCCTGTGTGCAATGCC	ENSG00000136574|GATA4|12
TGCGGCCTCTACATGAAGCTCCACGGGGTCCCCAGGCCTCTTGCAATGCGGAAAGAGGGGATCCAAACCAGAAAACGGAAGCCCAAGAACCTGAATAAATCTAAGACACCAGCAGCTCCT	ENSG00000136574|GATA4|13
TCAGGCAGTGAGAGCCTTCCTCCCGCCAGCGGTGCTTCCAGCAACTCCAGCAACGCCACCACCAGCAGCAGCGAGGAGATGCGTCCCATCAAGACGGAGCCTGGCCTGTCATCTCACTAC	ENSG00000136574|GATA4|14
GGGCCCTCCATCCACCCTGTCCTCTCGGCCCTGAAGCTCTCCCCACAAGGCTATGCGTCTCCCGTCAGCCAGTCTCCACAGACCAGCTCCAAGCAGGACTCTTGGAACAGCCTGGTCTTG	ENSG00000136574|GATA4|15
GCCGACAGTCACGGGGACATAATCACTGCGTAATCTTCCCTCTTCCCTCCTCAAATTCCTGCACGGACCTGGGACTTGGAGGATAGCAAAGAAGGAGGCCCTGGGCTCCCAGGGGCCGGC	ENSG00000136574|GATA4|16
CTCCTCTGCCTGGTAATGACTCCAGAACAACAACTGGGAAGAAACTTGAAGTCGACAATCTGGTTAGGGGAAGCGGGTGTTGGATTTTCTCAGATGCCTTTACACGCTGATGGGACTGGA	ENSG00000136574|GATA4|17
GGGAGCCCACCCTTCAGCACGAGCACACTGCATCTCTCCTGTGAGTTGGAGACTTCTTTCCCAAGATGTCCTTGTCCCCTGCGTTCCCCACTGTGGCCTAGACCGTGGGTTTTGCATTGT	ENSG00000136574|GATA4|18
GTTTCTAGCACCGAGGATCTGAGAACAAGCGGAGGGCCGGGCCCTGGGACCCCTGCTCCAGCCCGAATGACGGCATCTGTTTGCCATGTACCTGGATGCGACGGGCCCCTGGGGACAGGC	ENSG00000136574|GATA4|19
CCTTGCCCCATCCATCCGCTTGAGGCATGGCACCGCCCTGCATCCCTAATACCAAATCTGACTCCAAAATTGTGGGGTGTGACATACAAGTGACTGAACACTTCCTGGGGAGCTACAGGG	ENSG00000136574|GATA4|20
GCACTTAACCCACCACAGCACAGCCTCATCAAAATGCAGCTGGCAACTTCTCCCCCAGGTGCCTTCCCCCTGCTGCCGGCCTTTGCTCCTTCACTTCCAACATCTCTCAAAATAAAAATC	ENSG00000136574|GATA4|21
CCTCTTCCCGCTCTGAGCGATTCAGCTCTGCCCGCAGCTTGTACATGTCTCTCCCCTGGCAAAACAAGAGCTGGGTAGTTTAGCCAAACGGCACCCCCTCGAGTTCACTGCAGACCCTTC	ENSG00000136574|GATA4|22
GTTCACCGTGTCACACATAGAGGGGTTCTGAGTAAGAACAAAACGTTCTGCTGCTCAAGCCAGTCTGGCAAGCACTCAGCCCAGCCTCGAGGTCCTTCTGGGGAGAGTGTAAGTGGACAG	ENSG00000136574|GATA4|23
AGTCCTGGTCAGGGGGCAGGAGTGTCCCAAGGGCTGGCCCACCTGCTGTCTGTCTGCTCCTCCTAGCCCTTGGTCAGATGGCAGCCAGAGTCCCTCAGGACCTGCAGCCTCGCCCCGGCA	ENSG00000136574|GATA4|24
GAAGTCTTTTGTCCAGGAGGCAAAAAGCCAGAGATTCTGCAACACGAATTCGAAGCAAACAAACACAACACAACAGAATTCCTGGAAAGAAGACGACTGCTAAGACACGGCAGGGGGGCC	ENSG00000136574|GATA4|25
TGGAGGGAGCCTCCGACTCTGAGCTGCTCCGGGATCTGCCGCGTTCTCCTCTGCACATTGCTGTTTCTGCCCCTGATGCTGGAGCTCAAGGAGACTCCTTCCTCTTTCTCAGCAGAGCTG	ENSG00000136574|GATA4|26
TAGCTGACTGTGGCATTACTACGCCTCCCCACACGCCCAGACCCCTCACTCCAAAATCCTACTGGCTGTAGCAGAGAATACCTTTGAACCAAGATTCTGTTTTAATCATCATTTACATTG	ENSG00000136574|GATA4|27
TTTTCTTCCAAAGGCCCCCTCGTATACCCTCCCTAACCCACAAACCTGTTAACATTGTCTTAAGGTGAAATGGCTGGAAAATCAGTATTTAACTAATAAATTTATCTGTATTCCTCTTTC	ENSG00000136574|GATA4|28
CGCGGCCTCTGCGCCTCAGCCGACCTCCACCGCGGCAGGGACGCATCCTGCTCTGCACCCTGGTTCTCGGCGCTGCGCCCGCGGAGGCTCGTGCAGGGCAGGCTGCCCGTGCGGGTGAGG	ENSG00000136574|GATA4|29
ACTGAGTGCCGCGCAGGGAAGGAGTATCGCAGACCGGCGCCCAGGCCCAGCGGGGGAATCCAAGGGCCGTGTTGCAGGACTCGGCATTCGTTCTGCGCGGGTCACCTTGAATGTCTGTCC	ENSG00000136574|GATA4|30
CAACGTCTCCCTCCCACCCGGCTGAGAACAGCCTGGAATCCCTGTGCAGAGTTTGCCTCACACCAGGCCTTGAGCAGCCGCAGGGACGCCGCTCCCCACCGCGGGGACGCATCCTGCTCT	ENSG00000136574|GATA4|31
AGTCAGCGCCCTAGGGCCGAGTTGCTGGGCCGGGGACCCGAGCCGCGAGCTGGGGACTTGGAGGCGGCCGGCGCAGGGGCCGCGAGAGGCTTCGTCGCCGCTGCAGCTCCGGGGGCTCCC	ENSG00000136574|GATA4|32
GCAAAACCTATTTTGAACAGACACTAGGCTGTTGATAGTCTCTGTTTACTCCATTCAGTATGATATTCACGTGTTTTGCTGTGGGGATATTATTGTATTTCATTATAGAGTATTATCTCA	ENSG00000136574|GATA4|33
GGCCCTGCTGGAGGTATTCTGTAATAATACACAGTATTTGGATTTTTAAAAATGTGAATCTTCAAGTTGAATGAGGAAGAATCTTTTTTTAAAAAGTTTTGAAGCCTGAAACACACGTGG	ENSG00000136574|GATA4|34
CCTCAAGGGTTTGAGATGAGATAGGGGGAAGAAGCCATCCCTGTGAGAACTGTAGCCCTCCGCAGATAAGGACCTCTGCTGCTGTCCCCGGCAAATGTAGATAAAGCCATTAGCTTGCAC	ENSG00000136574|GATA4|35
ATGTATCAGAGCTTGCCATGGCCGCCAACCACGGGCCGCCCCCCGGTGCCTACGAGGCGGGCGGCCCCGGCGCCTTCATGCACGGCGCGGGCGCCGCGTCCTCGCCAGTCTACGTGCCCA	ENSG00000136574|GATA4|36
CGCAGGGGCCGCGAGAGGCTTCGTCGCCGCTGCAGCTCCGGGGGCTCCCAGGGGAGCGTGCGCGGAACCTCCAGGCCCAGCAGTTATGAAAGAAAAAAAATTACATTATCTTGAAGAACT	ENSG00000136574|GATA4|37
GGTGATACAGAAGAAAAGACAGTCTCCATTTTCAAACAGTCCCTCCTGGGAGAACACAGACAGGCAGAGGATTACAACACAAGGCAGCAAGCACTGGGAGACGAAAGTTTTGGCATCTGT	ENSG00000265107|GJA5|1
TCCCTGGCTGTGCCAAGATGGGCGATTGGAGCTTCCTGGGAAATTTCCTGGAGGAAGTACACAAGCACTCGACCGTGGTAGGCAAGGTCTGGCTCACTGTCCTCTTCATATTCCGTATGC	ENSG00000265107|GJA5|2
TCGTGCTGGGCACAGCTGCTGAGTCTTCCTGGGGGGATGAGCAGGCTGATTTCCGGTGTGATACGATTCAGCCTGGCTGCCAGAATGTCTGCTACGACCAGGCTTTCCCCATCTCCCACA	ENSG00000265107|GJA5|3
TTCGCTACTGGGTGCTGCAGATCATCTTCGTCTCCACGCCCTCTCTGGTGTACATGGGCCACGCCATGCACACTGTGCGCATGCAGGAGAAGCGCAAGCTACGGGAGGCCGAGAGGGCCA	ENSG00000265107|GJA5|4
AAGAGGTCCGGGGCTCTGGCTCTTACGAGTACCCGGTGGCAGAGAAGGCAGAACTGTCCTGCTGGGAGGAAGGGAATGGAAGGATTGCCCTCCAGGGCACTCTGCTCAACACCTATGTGT	ENSG00000265107|GJA5|5
GCAGCATCCTGATCCGCACCACCATGGAGGTGGGCTTCATTGTGGGCCAGTACTTCATCTACGGAATCTTCCTGACCACCCTGCATGTCTGCCGCAGGAGTCCCTGTCCCCACCCGGTCA	ENSG00000265107|GJA5|6
ACTGTTACGTATCCCGGCCCACAGAGAAGAATGTCTTCATTGTCTTTATGCTGGCTGTGGCTGCACTGTCCCTCCTCCTTAGCCTGGCTGAACTCTACCACCTGGGCTGGAAGAAGATCA	ENSG00000265107|GJA5|7
GACAGCGATTTGTCAAACCGCGGCAGCACATGGCTAAGTGCCAGCTTTCTGGCCCCTCTGTGGGCATAGTCCAGAGCTGCACACCACCCCCCGACTTTAATCAGTGCCTGGAGAATGGCC	ENSG00000265107|GJA5|8
CTGGGGGAAAATTCTTCAATCCCTTCAGCAATAATATGGCCTCCCAACAAAACACAGACAACCTGGTCACCGAGCAAGTACGAGGTCAGGAGCAGACTCCTGGGGAAGGTTTCATCCAGG	ENSG00000265107|GJA5|9
TTCGTTATGGCCAGAAGCCTGAGGTGCCCAATGGAGTCTCACCAGGTCACCGCCTTCCCCATGGCTATCATAGTGACAAGCGACGTCTTAGTAAGGCCAGCAGCAAGGCAAGGTCAGATG	ENSG00000265107|GJA5|10
ACCTATCAGTGTGACCCTCCTTTATGGGAGGATCAGGACCAGGTGGGAACAAAGGAGGCTCAGAGAGGAAAGACGTGTCCCTTCTGAACTGATGCTTTCTCACTGTCATCACTGCTTGGC	ENSG00000265107|GJA5|11
TCCTTTGAGCCCCGGGTCTCAATGACGTTGCTCATTAATTCTAGAAACTATAACCAGGGCTCTGGGATAGTAAGAGAGGTGACAACCCACCCAGACTGCAGTTCCCTCCCCACCCTCTAC	ENSG00000265107|GJA5|12
CCAGTATACGAAGCCTTTCAGATTACTCATGAAACAGGGTAGAGGGAAAGAAGGGAAGCATGGCAAAAGCTGGCCTGGAAGGGATAGCCAGAGGGATAGAATGACTCTCTCTCTACATAC	ENSG00000265107|GJA5|13
CTCCTCCAAGGAAGAGCTCAAAGTTCCCAGCCAATAGACAGCATGAATCAAGGAACTTGCATTATATGTGCTCTTGAATCTGTTGTCTCCATGGACCATTCCTCGGAGTAGTGGTGAGAT	ENSG00000265107|GJA5|14
GGCCTTGGGTTGCCCTTGGCTTCTCCTCCCTCTACTCAGCCTTAAAAAGGGCTTCTTGGAACTTTACCAGCAGCCTCAGCTTTACAAATGCCTTGGTATGTACCTCTGGCAAATGCCCTG	ENSG00000265107|GJA5|15
GTATGTACCTCTGGCAAATGCCCCACCTTGGTGATGTTGCAACCTTTCCTTCTGCTAGGGTGTACACCTAGCCTGTGCAGGTGTCAGCCCTGCTAGGGAGTCACTGTACACACAAACTCT	ENSG00000265107|GJA5|16
ACTGGAATTCCTGCCAACATCTGTCACCCTGCAGCTCCTTTACAGTTCAATCCAATGATAGAAACCATCCCTTCCCTTTCTCCCTTGGCTGTTCACCCAGCCATTCCCTGAAGGCCTTAC	ENSG00000265107|GJA5|17
CAACAGGAATATCCAAGAAGCTGTTGTCCTCTCTCGAACCCTGACCAGATCATCAGCCACTGAGGCCAGTGGAATTTCCCCAGGCCTTGTTAAAACAAAGAAAGCATTGTACTTCTCAGA	ENSG00000265107|GJA5|18
TTCCCCTTGTGGAAAAAAAAATTCTGCTGTGAAGATGAAAATAAAAATGGAGAGAAAACACTGGAAAACTATTTTCCCCTCCTATTTACTTCCTTTGCTGACTGCCAACTTAGTGCCAAG	ENSG00000265107|GJA5|19
AGGAGGTGTGATGACAGCTATGGAGGCCCCCAGATCTCTCTCTCCTGGAGGCTTTAGCAGGGGCAAGGAAATAGTAGGGGAATCTCCAGCTCTCTTGGCAGGGCCTTTATTTAAAGAGCG	ENSG00000265107|GJA5|20
CAGAGATTCCTATGTCTCCCTAGTGCCCCTAATGAGACTGCCAAGTGGGGGCTGTAGAAAAGCCTTGCCTTCCCCAGGGATTGGCCTGGTCTCTGTATTCACTGGATCCATAATGGGTTG	ENSG00000265107|GJA5|21
CTGTTGTTTTGGATGAAGGTAAACGATGCTTGGAATTGGAAACTGAGACTTATAGAGGGATTATTACATTATTAAAATGCACGTGTGTGTGTGTGTGGGTGCTGATGGGATGGGTAAAGG	ENSG00000265107|GJA5|22
CTTGGGGAGTCCTGAAATAAGGAAAGGAAACCACAGAGAAACTTGTGTCTTCCTGCTCTCCTCTCCGGCTGCCTGGCAGTTATTAACCTAAACAGATAGCCACAAGAGGTTGGGACAGAG	ENSG00000265107|GJA5|23
GAGGGTAAAGGCTCAGAAGGAGGTTCAACCTCTGACTCACCTGCCCATCTCTGGGCCCTCTGCTGACACTTGGATGCTATTGTTGGGTGGAAAGATAAATGAGAGTGGAGAGGTGGAGGA	ENSG00000265107|GJA5|24
AAGTGACTAGGATGCCATTTAGGAAGGAATGTCTGATCATCCCGGGTCCCTGGAGGGGACACCTTTTAATCTATTGCCTAGCATTAATATTTTCTCTCCTTCTATCTCTGAAATGTTTTA	ENSG00000265107|GJA5|25
TGAAATGAGTGTTCTTGAATTAGAAATTCTGTGGGATCAATCTTTGATGGTGAGGGTTTTAGAAAGGAAAAATATAGTAAAATGTGTAATTTGTCTTAATAAAATCTATCTCTACATCTA	ENSG00000265107|GJA5|26
GAGGAACAACTGACAGGCTCAAGAGCAAAAAGCGTGGGCAGTTGGAGAAGAAGCAGCCAGAGTGTGAAGAAGCCCACGGAAGGAAAGTCCAGGGAGGAGGAAAAGAAGCAGAAGTTTTGG	ENSG00000265107|GJA5|27
GATTGCCACCCAGGACGATGAGCGGCTGAGATGGAGACGTCTGCCTCAGCCACTGCCTCCGAGAAGCAAGAAGCCAAAAGTGGGATCCTGGAGGCCGCTGGCTTCCCCGACCCGGGTAAA	ENSG00000074047|GLI2|1
AAGGCCTCTCCTTTGGTGGTGGCTGCAGCGGCAGCAGCAGCGGTAGCTGCCCAAGGAGTGCCGCAGCATCTCTTGCCACCATTCCATGCGCCCCTACCGATTGACATGCGACACCAGGAA	ENSG00000074047|GLI2|2
GGAAGGTACCATTACGAGCCTCATTCTGTCCACGGTGTGCACGGGCCCCCTGCCCTCAGCGGCAGCCCTGTCATCTCTGACATCTCCTTGATCCGGCTTTCCCCGCACCCGGCTGGCCCT	ENSG00000074047|GLI2|3
GGGGAGTCCCCCTTCAACGCCCCCCACCCGTACGTGAACCCCCACATGGAGCACTACCTCCGTTCTGTGCACAGCAGCCCCACGCTCTCCATGATCTCTGCAGCCAGGGGCCTCAGCCCC	ENSG00000074047|GLI2|4
GCTGATGTGGCCCAGGAGCACCTTAAGGAGAGGGGACTGTTTGGCCTTCCTGCTCCAGGCACCACCCCCTCAGACTATTACCACCAGATGACCCTCGTGGCAGGCCACCCCGCGCCCTAC	ENSG00000074047|GLI2|5
GGGGACCTGCTGATGCAGAGCGGGGGCGCTGCCAGCGCACCCCATCTCCACGACTACCTCAACCCCGTGGACGTGTCCCGTTTCTCCAGCCCGCGGGTGACGCCCCGCCTGAGCCGCAAG	ENSG00000074047|GLI2|6
CGGGCGCTGTCCATCTCCCCACTCTCAGACGCCAGCCTGGACCTGCAGCGGATGATCCGCACCTCACCCAACTCGCTAGTGGCCTACATCAACAACTCCCGAAGCAGCTCGGCGGCCAGC	ENSG00000074047|GLI2|7
GGTTCCTACGGGCATCTGTCAGCGGGTGCCCTCAGCCCAGCCTTCACCTTCCCCCACCCCATCAACCCCGTGGCCTACCAGCAGATTCTGAGCCAGCAGAGGGGTCTGGGGTCAGCCTTT	ENSG00000074047|GLI2|8
GGACACACACCACCCCTGATCCAGCCCTCACCCACCTTCCTGGCCCAGCAGCCCATGGCCCTCACCTCCATCAATGCCACGCCCACCCAGCTCAGCAGCAGCAGCAACTGTCTGAGTGAC	ENSG00000074047|GLI2|9
ACCAACCAGAACAAGCAGAGCAGTGAGTCGGCCGTCAGCAGCACCGTCAACCCTGTCGCCATTCACAAGCGCAGCAAGGTCAAGACCGAGCCTGAGGGCCTGCGGCCGGCCTCCCCTCTG	ENSG00000074047|GLI2|10
GCGCTGACGCAGGGCCAGGTGTCTGGACACGGCTCATGTGGGTGTGCCCTTCCCCTCTCCCAGGAGCAGCTGGCTGACCTCAAGGAAGATCTGGACAGGGATGACTGTAAGCAGGAGGCT	ENSG00000074047|GLI2|11
GAGGTGGTCATCTATGAGACCAACTGCCACTGGGAAGACTGCACCAAGGAGTACGACACCCAGGAGCAGCTGGTGCATCACATCAACAACGAGCACATCCACGGGGAGAAGAAGGAGTTT	ENSG00000074047|GLI2|12
GTGTGCCGCTGGCAGGCCTGCACGCGGGAGCAGAAGCCCTTCAAGGCGCAGTACATGCTGGTGGTGCACATGCGGCGACACACGGGCGAGAAGCCCCACAAGTGCACGTTCGAGGGCTGC	ENSG00000074047|GLI2|13
TCGAAGGCCTACTCCCGCCTGGAGAACCTGAAGACACACCTGCGGTCCCACACCGGGGAGAAGCCATATGTGTGTGAGCACGAGGGCTGCAACAAAGCCTTCTCCAACGCCTCGGACCGC	ENSG00000074047|GLI2|14
GCCAAGCACCAGAATCGCACCCACTCCAACGAGAAACCCTACATCTGCAAGATCCCAGGCTGCACCAAGAGATACACAGACCCCAGCTCTCTCCGGAAGCATGTGAAAACGGTCCACGGC	ENSG00000074047|GLI2|15
CCAGATGCCCACGTCACCAAGAAGCAGCGCAATGACGTGCACCTCCGCACACCGCTGCTCAAAGAGAATGGGGACAGTGAGGCCGGCACGGAGCCTGGCGGCCCAGAGAGCACCGAGGCC	ENSG00000074047|GLI2|16
AGCAGCACCAGCCAGGCCGTGGAGGACTGCCTGCACGTCAGAGCCATCAAGACCGAGAGCTCCGGGCTGTGTCAGTCCAGCCCCGGGGCCCAGTCGTCCTGCAGCAGCGAGCCCTCTCCT	ENSG00000074047|GLI2|17
CTGGGCAGTGCCCCCAACAATGACAGTGGCGTGGAGATGCCGGGGACGGGGCCCGGGAGCCTGGGAGACCTGACGGCACTGGATGACACACCCCCAGGGGCCGACACCTCAGCCCTGGCT	ENSG00000074047|GLI2|18
GCCCCCTCCGCTGGTGGCCTCCAGCTGCGCAAACACATGACCACCATGCACCGGTTCGAGCAGCTCAAGAAGGAGAAGCTCAAGTCACTCAAGGATTCCTGCTCATGGGCCGGGCCGACT	ENSG00000074047|GLI2|19
CCACACACGCGGAACACCAAGCTGCCTCCCCTCCCGGGAAGTGGCTCCATCCTGGAAAACTTCAGTGGCAGTGGGGGCGGCGGGCCCGCGGGGCTGCTGCCGAACCCGCGGCTGTCGGAG	ENSG00000074047|GLI2|20
CTGTCCGCGAGCGAGGTGACCATGCTGAGCCAGCTGCAGGAGCGCCGCGACAGCTCCACCAGCACGGTCAGCTCGGCCTACACCGTGAGCCGCCGCTCCTCCGGCATCTCCCCCTACTTC	ENSG00000074047|GLI2|21
TCCAGCCGCCGCTCCAGCGAGGCCTCGCCCCTGGGCGCCGGCCGCCCGCACAACGCGAGCTCCGCTGACTCCTACGACCCCATCTCCACGGACGCGTCGCGGCGCTCGAGCGAGGCCAGC	ENSG00000074047|GLI2|22
CAGTGCAGCGGCGGCTCCGGGCTGCTCAACCTCACGCCGGCGCAGCAGTACAGCCTGCGGGCCAAGTACGCGGCAGCCACTGGCGGCCCCCCGCCCACTCCGCTGCCGGGCCTGGAGCGC	ENSG00000074047|GLI2|23
ATGAGCCTGCGGACCAGGCTGGCGCTGCTGGACGCGCCCGAGCGCACGCTGCCCGCCGGCTGCCCACGCCCACTGGGGCC	ENSG00000074047|GLI2|24
CCCGCCTTCCCCCACGAGGCTCCAGGCGGCGGAGCCAGGCGGGCCAGCGACCCTGTGCGGCGGCCCGATGCCCTGTCCCTGCCGCGGGTGCAGCGCTTCCACAGCACCCACAACGTGAAC	ENSG00000074047|GLI2|25
TTCCACAGCACCCACAACGTGAACCCCGGCCCGCTGCCGCCCTGTGCCGACAGGCGAGGCCTCCGCCTGCAGAGCCACCCGAGCACCGACGGCGGCCTGGCCCGCGGCGCCTACTCGCCC	ENSG00000074047|GLI2|26
ATCAGCGAGAACGTGGCGATGGAGGCCGTGGCGGCAGGAGTGGACGGCGCGGGGCCCGAGGCCGACCTGGGGCTGCCGGAGGACGACCTGGTGCTTCCAGACGACGTGGTGCAGTACATC	ENSG00000074047|GLI2|27
AAGGCGCACGCCAGTGGCGCTCTGGACGAGGGCACCGGGCAGGTGTATCCCACGGAAAGCACTGGCTTCTCTGACAACCCCAGACTACCCAGCCCGGGGCTGCACGGCCAGCGCAGGATG	ENSG00000074047|GLI2|28
TGCCAGTTAGGCTTTGGGGCGCCCTCCAGCCTGAACAAAAATAACATGCCTGTGCAGTGGAATGAGGTGAGCTCCGGCACCGTAGACGCCCTGGCCAGCCAGGTGAAGCCTCCACCCTTT	ENSG00000074047|GLI2|29
CCTCAGGGCAACCTGGCGGTGGTGCAGCAGAAGCCTGCCTTTGGCCAGTACCCGGGCTACAGTCCGCAAGGCCTACAGGCTAGCCCTGGGGGCCTGGACAGCACGCAGCCACACCTGCAG	ENSG00000074047|GLI2|30
CCCCGCAGCGGAGCCCCCTCCCAGGGCATCCCCAGGGTAAACTACATGCAGCAGCTGCGACAGCCAGTGGCAGGCAGCCAGTGTCCTGGCATGACTACCACTATGAGCCCCCATGCCTGC	ENSG00000074047|GLI2|31
TATGGCCAAGTCCACCCCCAGCTGAGCCCCAGCACCATCAGTGGGGCCCTCAACCAGTTCCCCCAATCCTGCAGCAACATGCCAGCCAAGCCAGGGCATCTGGGGCACCCTCAGCAGACA	ENSG00000074047|GLI2|32
GAAGTGGCACCTGACCCCACCACGATGGGCAATCGCCACAGGGAACTTGGGGTCCCCGATTCAGCCCTGGCTGGAGTGCCACCACCTCACCCAGTCCAGAGCTACCCACAGCAGAGCCAT	ENSG00000074047|GLI2|33
CACCTGGCAGCCTCCATGAGCCAGGAGGGCTACCACCAGGTCCCCAGCCTTCTGCCTGCCCGCCAGCCTGGCTTCATGGAGCCCCAAACAGGCCCGATGGGGGTGGCTACAGCAGGCTTT	ENSG00000074047|GLI2|34
GGCCTAGTGCAGCCCCGGCCTCCCCTCGAGCCCAGCCCCACTGGCCGCCACCGTGGGGTACGTGCTGTGCAGCAGCAGCTGGCCTACGCCAGGGCCACAGGCCATGCCATGGCTGCCATG	ENSG00000074047|GLI2|35
CCGTCCAGTCAGGAAACAGCAGAGGCTGTGCCCAAGGGAGCGATGGGCAACATGGGGTCGGTGCCTCCCCAGCCGCCTCCGCAGGACGCAGGTGGGGCCCCGGACCACAGCATGCTCTAC	ENSG00000074047|GLI2|36
TACTACGGCCAGATCCACATGTACGAACAGGATGGAGGCCTGGAGAACCTCGGGAGCTGCCAGGTCATGCGGTCCCAGCCACCACAGCCACAGGCCTGTCAGGACAGCATCCAGCCCCAG	ENSG00000074047|GLI2|37
CCCTTGCCCTCACCAGGGGTCAACCAGGTGTCCAGCACTGTGGACTCCCAGCTCCTGGAGGCCCCCCAGATTGACTTCGATGCCATCATGGATGATGGCGATCACTCGAGTTTGTTCTCG	ENSG00000074047|GLI2|38
GGTGCTCTGAGCCCCAGCCTCCTCCACAGCCTCTCCCAGAACTCCTCCCGCCTCACCACCCCCCGAAACTCCTTGACCCTGCCCTCCATCCCCGCAGGCATCAGCAACATGGCTGTCGGG	ENSG00000074047|GLI2|39
GACATGAGCTCCATGCTCACCAGCCTCGCCGAGGAGAGCAAGTTCCTGAACATGATGACCTAGAGGCCCGAGCGCCTGGTGCTGAGTGCACCCGGAGGGGTCATCGCTGCCCAGAGCCTG	ENSG00000074047|GLI2|40
GGGATTCCAGCTGTCTTGTCTTTTTCCAAAAAAGTGTTAAATAGGCTTGAGGGGTTGTTGCGCAATGGCCGCTTCAGATGACAGATGTTGTAAGAGAAGGTTTATGGGCATCCTCTCTGG	ENSG00000074047|GLI2|41
TCTTTTGGATTATTCCTCAGAACAATGAAAAAAGTCTCCATAGGACAGGAAGGAATGCAAAACTCATTTACACAGTGCTTTCCAGCCTTTGGTGCTTACAGGACCGCGCTGTTCCGGCTT	ENSG00000074047|GLI2|42
CTTCACGGCTGACATTCGGCTAACGAGGGATTACTTTGGCCAAAACCTTTCAAAGGATATGCAGAAAGATGGTAGGGAGCATTTGGGTTTGAATCTGAATGCTATACTGGATACTCTGCT	ENSG00000074047|GLI2|43
CCGGAAAGATGAGCTTTTTATTCTACTACTTGGAAGGAAAAGGAATTCCTGGTCCACCTGAATTCCTCTATGAAGCCTAACTCTTGAGGTCTCTAACATACCTTGTCATAGAGGAAAAGC	ENSG00000074047|GLI2|44
ACAGATTATACCTGGATGATTCAGGAGCACATTCTGATTCCAGGTTTGGTAGAGCTGGCTCTTCTACTCCGTAAAGCCGAGTCTGGGACTGGCAGCCCATCCAAGTGTATATGAATGAAT	ENSG00000074047|GLI2|45
AAAGCATCCAAGTATATATGAATGAATAAAGTATGTAAGTATCACCAGAAAAAGGAAAGAAAAAATGTACTCCTTGGGGCAAGCCCAGAAGCTGCCCTGGCCTCTCCAGACCGTGTTTAC	ENSG00000074047|GLI2|46
AGTGTTTGCATGTAGAATGTAGCCCTTCCTGAAAAGAAGACTTGTTTCTAAATACCTCGGGGCTGCTGGAGCCGCTGTGGGTTAGGGATGGACTGAGGCCTCGAGGAGTGAGGGTGCACC	ENSG00000074047|GLI2|47
CGGGGCCCAGCCTCAGGCTGCCCTAGGGATCTCTCAGTAGGAAGAGGAAGTTGCGTGTTTACCCAATCCTGTTTCTCCAATGCAACGTCCACCCACTTTACCACCAAAAACTCCAGGGCC	ENSG00000074047|GLI2|48
TGACGGCAGCCCGGTCCCCCAGCACTCACCAGCAGCCCAGTGTTCTCCACCAAGCCACAGTGTGCATGCCTGGTATCCTCCGGATTCCCTTCCTTCTGCCCGCTGAGTCACTGGGCAGAG	ENSG00000074047|GLI2|49
AATGATGACATGTGTAGGTGGTGTGGTTGGGGGTGGAAAGGGGAAGGGGTTGATCCTCAGGACTCTGAGGGAGCATCGTTGAATTTTCCTGTTCAGTGTGACCAAGACCCACCTGGAAAT	ENSG00000074047|GLI2|50
TGTGACCAAGACCCACCTGGAAATGGAATTTGGAACTGGCTTCAGGAGACATCATTCCTGAACACACTGTAGGGTGAATTGGTGCATCTTCCCCACCATACACACACACACACACACACA	ENSG00000074047|GLI2|51
CCAAACCTTTTCATGGGGAATGTGTGGCAACCTTGCCAAACAGCACCACTCAGAGTGTGACTCTGACTGTGACCTTGGCCTTAATGAGGAACTTCTTAGGAGAGTTTGAGGACAAGGCCA	ENSG00000074047|GLI2|52
ACATCGTCATCTGGGCTCGCTGCGTCCCAGCACATCAAACTCTGTCCAGAGACAAGGCCAACTGCAAATGAAAGCCAGGGAACATTGCTAAGGGTCTGTGGCTCTGTGGTGGTGTTCATC	ENSG00000074047|GLI2|53
GCCTTCCTGAGATAGGATTTCCCTTGCCAGTCCCAACCTGTATATATTCTGTACAGAAGACATCCCTGAATATACTGTAGGTGAGTCGTCCAGCCAAATTTATATCTCCAAAACATTTTT	ENSG00000074047|GLI2|54
AGCTTTTTCTACATGCTATGAATTGAGATGACATGCTCAACTTGTAAATAAGTCTTTTTGTACATTAAAAAAGTAATTTTTTCATAATTTATCTTGTCTATCTGCTTCCCCCTTGACAGT	ENSG00000074047|GLI2|55
AGTTAATGAGAACCTGGGCAGTAAATTTGGTGCATTCGAGCAGAAATTAGGCTGTATTTTTTCTTAACAGTGTCAAAATTGACTATCCCGCCTTTGCCAAGAAATGTTTAATGCTGAGGC	ENSG00000074047|GLI2|56
TGAAGTTCGTGGACTCCTACAATAATGCTATAAATGCATAGAAGAAAAGACACAGGACTGTGAAAGAAAGTGATGATGCGATGTCTAAAACGTTCAAGGCACCGCATCTGTGATCAAGAA	ENSG00000074047|GLI2|57
GTCAACTCCTCAGCCTTGGTCCCCTTGAATGGTGACCAGGCTGGCTGGCGTTCCTTCACACTACTTCCAAACAACAAGTTTTTGGGTTTTATGCTCATTAAAGAGCCTTTGGTAAGCACT	ENSG00000074047|GLI2|58
CTTTTGCATGCAAACCATATATGATCTATTGTAATAATAACAGTAAGGGTCTATCCAGGTAGGTCCTGTGTAGCTGAGAACCACTGGTTGTAACCAACCAAAGCCTGCAGAAGCTGGTGT	ENSG00000074047|GLI2|59
AGCTGTACATGGAGATCTTGCTGGGAAAATCCGCTTGCTCCCCTCACGTCGTCCAGCCCAGGAGAACCACCGCCGTCACCCCGGAGCTTCCTCGGCCACCGCGCAGAGCCCTCCGAGAGC	ENSG00000164107|HAND2|1
CCGAGCCGCGGTCTTCGAGCTCCAAGGCTCATTCAGGGCCCCAGATCCTTGCCCCGAAAGGAGAGGATCTGAGAAAATGGATGCACTGAGACCTCTCTGAAAACCCTCCGAGAGAGCGCG	ENSG00000164107|HAND2|2
AGAGGAGCGAGGACACGTTACTCGCAGCTAAAATCACATTTAAGGACCAAAACAACAACAACCAAAAATTTCATTAAAACAATAAGCGCCCAAGAACCCAGATCGGGCTGGTGGGGGGAG	ENSG00000164107|HAND2|3
GGGAAGAGGCGGGAAGGGGAGGGTCGCACGGAGGTAGCTTTGCAGTGAGCAGTCGACCCCGCCGCCCCCCGGCACAGCTGGACCGGCTCCTCCAGCCGCGGCTCAGACTCGCCCCTGGAT	ENSG00000164107|HAND2|4
TCCGGGTTAGCTTCGGTGCCAGGACCGCGGCCCGGGCTTGGATTCCCGAGACTCCGCGTACCAGCCTCGCGGGAGCCCCGGCACCTTTGTATGAGCACGAGAGGATTCTGCCTCCGCGCA	ENSG00000164107|HAND2|5
GAGGATTCTGCCTCCGCGCAGCAGCCCGGGAAGCAGGAGCCGAAGCGCGGGCCGTGGAGCAAGGCGGGAACCGGAGGCGGCGGCGGCGGCGGCCAGGGGCGCACGGTGCCAGGACCAGCT	ENSG00000164107|HAND2|6
TGGGGGAGGACGCCGAGCGCTGAGGCAGGGGCCCGGGCCGAGGGCGCGGCGGGGCTGCGCGCACGCTGGGGCGCGTGGAGGGGCGCGGAGGGCGAAATGAGTCTGGTAGGTGGTTTTCCC	ENSG00000164107|HAND2|7
TCCCCACCACCCGGTGGTGCACCACGAGGGCTACCCGTTTGCCGCCGCCGCCGCCGCAGCTGCCGCCGCCGCCGCCAGCCGCTGCAGCCATGAGGAGAACCCCTACTTCCATGGCTGGCT	ENSG00000164107|HAND2|8
CATCGGCCACCCCGAGATGTCGCCCCCCGACTACAGCATGGCCCTGTCCTACAGCCCCGAGTATGCCAGCGGCGCCGCCGGCCTGGACCACTCCCATTACGGGGGGGTGCCGCCGGGCGC	ENSG00000164107|HAND2|9
CGGGCCCCCGGGCCTGGGGGGGCCGCGCCCGGTGAAGCGCCGAGGCACCGCCAACCGCAAGGAGCGGCGCAGGACTCAGAGCATCAACAGCGCCTTCGCCGAACTGCGCGAGTGCATCCC	ENSG00000164107|HAND2|10
AACTCTCCAAAATCAAGACCCTGCGCCTGGCCACCAGCTACATCGCCTACCTCATGGACCTGCTGGCCAAGGACGACCAGAATGGCGAGGCGGAGGCCTTCAAGGCAGAGATCAAGAAGA	ENSG00000164107|HAND2|11
CCGACGTGAAAGAGGAGAAGAGGAAGAAGGAGCTGAACGAAATCTTGAAAAGCACAGTGAGCAGCAACGACAAGAAAACCAAAGGCCGGACGGGCTGGCCGCAGCACGTCTGGGCCCTGG	ENSG00000164107|HAND2|12
AGCTCAAGCAGTGAGGAGGAGGAGAAGGAGGAGGAGGAGAGCGCGAGTGAGCAGGGGCCAAGGCGCCAGATGCAGACCCAGGACTCCGGAAAAGCCGTCCGCGCTCCGCTCTGAGGACTC	ENSG00000164107|HAND2|13
CTTGCATTTGGAATCATCCGGTTTATTTATGTGCAATTTCCTTCCCCTCTCTTTGACCCCCTTTGAGGCATCTGCTCCCCGTCTCCCCCTCCAAAAAAAAAGTGGATATTTGAAGAAAAG	ENSG00000164107|HAND2|14
CATTCCATATTTTAATACGAAGAGGACACTCCCGTGTGGTAAGGGATCCCGTCGTCTCATAGATTCTGTGTGCGTGAATGTTCCCTCTTGGCTGTGTAGACACCAGCGTTGCCCCCCGCC	ENSG00000164107|HAND2|15
AACCTACTCAACCCCTTCCAGATAAAGACAGTGGGCACTAGTGCGTTTGTGAAGTGTATCTTTAATACTTGGCCTTTGGATATAAATATTCCTGGGTATTATAAAGTTTTATTTCAAAGC	ENSG00000164107|HAND2|16
AGAAAACAGGGCCGCTAACATTTCCGTTGGGGTCGGTATCTAGTGCTATCCATTCATCTGTGGTCGTTCCCTCTTTGAAGATGTTTCCAACAGCCACTTGTTTTGTGCACTTCCGTCCTC	ENSG00000164107|HAND2|17
TAAAACTAAATGGAATTTAATTAATATTGAAGGTGTAAACGTTGTAAGTATTCAATAAACCACTGTGTTTTTTTTTTACAAAAACCTTAATCTTTTAATGGCTGATACCTCAAAAGAGTT	ENSG00000164107|HAND2|18
TTGAAAACAAAGCTGTTATACTTGTTTTCGTAATATTTAAAATATTCAGAAGTAAACTAAATTATCATGATTGCCTCTAACTTTATTTTAAAGACTCAGTGGTTCCAACCAGTCACCCTG	ENSG00000164107|HAND2|19
ACCTGCGGCCTACGCAGGAGGAGGAGGTGCTCTTAAAGAGAAGTGTCCTTGTTACAAATCCTGCAAATGGTCTGGGGTTTGTCGGTGTGGTGTCTCCTTCCCTCTTCCCCCAGCTGGAGA	ENSG00000164107|HAND2|20
ACGCTGAGTAGTCTCTAGAAGGAAGATCTGGGCTGGAGAACCCAGTCCGGCAGTTCGCTCAGAAGGTGTAAAGGTGCTCTTGCTTTCCTGAAGTCAATCAGAAGCCATTTCTTGAGGCCG	ENSG00000164107|HAND2|21
TCAGTTTTTGTTTGGAGAGTGTTTCTGGTGGAGGAGTTGTGAGGAGAACCCCGGCATTATTGCTGCAACGGGAACTAGTCTGGGGTGTTTAATTCAAACTATGGGGCTTTCATCCAAGAA	ENSG00000164107|HAND2|22
GGAAAATCCGCTTGCTCCCCTCACGTCCCCGGGAAGCAGGAGCCGAAGCGCGGGCCGTGGAGCAAGGCGGGAACCGGAGG	ENSG00000164107|HAND2|23
CCGGCCTCTTTCCAATTGGGCTGAGAAATGGCATCTCGTGTTCTTTGGCTGCGTCCCGCTTCAAGGTTGTTTGCACCAGGTTGTGTAAGGATGGCTTCCGGCATAAGCAGAGAGTTGAGG	ENSG00000164107|HAND2|24
GGAGGGTGTCAGCAGGAGGAGGAGAAGGTTAGGGATGCTTTGCGCTGGTGATCTTACCTCCGGGTTATCGCTGCTCCCCTAGTACTTAGGACGGACCTTGAAAACTCTGGGTCGCGATCG	ENSG00000164107|HAND2|25
ATCGCGATCGCACTGGTCTGGATGCCTCACCCCGTCTCTGTTAGACCCTTCTTTTGGCCTCCAATCCAATCTTGCTTTCAGATGTTTCCAGAATAAGTCTCGAAGAAGCCCTTGATTCCA	ENSG00000164107|HAND2|26
ATTATTTCACTATTGATCGCACCCCCTACCCCACTCCCAGAAGGAGGCTGCCAGAGACTGAGCCCTGAGTTTTGTGGTTGTTCTCATACTATGCCCGGAAAACGTAATGGTAAACATAAA	ENSG00000164107|HAND2|27
ATAAGTACTTTTGACTTCAAAATACAGCTCCAATTTTTCCTTGGCTATGACGTTAAAATGTAATTTCCCAGATGAGTATATTCCATTGGCATTTCTAATTTTATTTGAATAAGCCTGTAC	ENSG00000164107|HAND2|28
GAGAGACAAGCTAGAGGCTCTGCGGACTTCTGCGGGCGGCTGACAACGCGAGGGCGAGGGGAGAAAGCCATCAGGTCCTAGACGTGGAAGAAAGGAGCCTACCAAAGTGTTGGAGTAAAC	ENSG00000164107|HAND2|29
GTAAAATATGTATTTCTGTCGCCGCTGCGAGGCCGCTCGGTCCCAGAGCCCCCTCGAGCCTCCGGAATGCGAAGTTAAAGGAATCGCGGCGGCCACCGCTGCTCACTTTGTTACCCGGTT	ENSG00000113430|IRX4|1
AGAAAAGTTTGCGGAGCGCGGGGATGGACTAACCGGCTCTCCTGCTTCGCCCTCCCAGCGCCTAGAAGCCTGCAGCTCCGGAGCAGTGGCCGCGCCACGCCGGCCCCAGCGCGCAGAACC	ENSG00000113430|IRX4|2
CTGCAGGCCCCGCCCGTCCGCCCCGGGCCGCGCCCGCCATGTCCTACCCGCAGTTTGGATACCCCTACTCCTCGGCTCCCCAGTTCTTGATGGCCACCAACTCCCTGAGCACGTGCTGCG	ENSG00000113430|IRX4|3
AGTCCGGAGGCCGCACGCTGGCGGACTCCGGGCCCGCCGCCTCGGCCCAGGCGCCGGTCTACTGCCCGGTCTACGAGAGCCGGCTGCTGGCCACCGCGCGCCACGAGCTCAACTCGGCCG	ENSG00000113430|IRX4|4
CGGCGCTGGGCGTCTATGGGGGTCCCTATGGCGGATCGCAGGGCTATGGCAACTACGTGACCTACGGCTCGGAGGCGTCCGCCTTCTACTCGCTGAACAGCTTTGATTCCAAGGATGGTT	ENSG00000113430|IRX4|5
CGGGATCTGCGCATGGGGGCCTGGCACCAGCCGCTGCCGCCTACTACCCTTACGAGCCAGCTCTGGGCCAGTACCCCTATGACAGGTATGGAACCATGGACAGCGGCACGCGGCGCAAGA	ENSG00000113430|IRX4|6
ACGCCACGCGCGAGACCACCAGCACGCTCAAGGCCTGGCTGCAGGAGCACCGCAAGAACCCCTACCCCACCAAGGGCGAGAAGATCATGCTGGCCATCATCACCAAGATGACCCTCACAC	ENSG00000113430|IRX4|7
AGGTCTCCACCTGGTTCGCCAACGCGCGCCGGCGCCTCAAGAAGGAGAACAAGATGACGTGGCCGCCGCGGAACAAGTGCGCAGACGAGAAGCGGCCCTACGCGGAGGGCGAGGAGGAGG	ENSG00000113430|IRX4|8
AGGGGGGCGAGGAGGAGGCGCGGGAGGAGCCCCTCAAGAGCTCCAAGAACGCAGAGCCCGTGGGCAAAGAGGAGAAGGAGCTGGAGCTTAGTGACTTGGACGACTTCGACCCGCTGGAAG	ENSG00000113430|IRX4|9
TGTCTCTGGCCGCGGGTGGCGGAGCTGCTCTGGACGAGGACCTGGAGAGGGCCCGGAGCTGTCTCCGCAGCGCGGCGGCCGGGCCGGAGCCACTGCCGGGCGCAGAGGGCGGCCCTCAGG	ENSG00000113430|IRX4|10
TCTGCGAGGCCAAGCTGGGGTTTGTGCCGGCGGGGGCGTCGGCAGGCCTGGAGGCTAAGCCGCGCATCTGGTCCCTGGCCCACACAGCCACCGCCGCCGCCGCCGCCGCCACCTCCCTGA	ENSG00000113430|IRX4|11
GCCAGACTGAGTTTCCGTCGTGCATGCTCAAGCGCCAAGGTCCCGCGGCCCCTGCGGCTGTGTCCTCCGCGCCCGCCACGTCCCCGTCTGTGGCCCTTCCCCACTCTGGCGCCCTGGACA	ENSG00000113430|IRX4|12
GGCACCAGGACTCCCCGGTAACCAGTCTCAGAAACTGGGTGGACGGGGTCTTCCACGACCCCATCCTCAGGCACAGCACTTTGAACCAGGCCTGGGCCACCGCCAAGGGCGCCCTCCTGG	ENSG00000113430|IRX4|13
CCTCTGGGACGCTCGCTGGGGGCGGGCGCGAACGTGCTGACTGCACCCCTGGCCCGCGCCTTTCCGCCTGCCGTGCCCCAGGACGCCCCAGCTGCAGGCGCCGCCAGGGAGCTGCTCGCC	ENSG00000113430|IRX4|14
TGCTCGCCCTGCCCAAGGCCGGCGGCAAACCCTTCTGCGCCTGAGGCGGGCGGGTCCCGAGCCCAGGAGGGAACCCGCGCTCAGGCGGACGGCGCCGACTCTTTTCACTGAGTTTCCAGA	ENSG00000113430|IRX4|15
GGAAGACTAGCGCGGCCACCGCGAAGCCGCCAACCCACCGGAGAGGGGGCTTCTGAACTTGGACTCCTGGGAACATGGACAAGCCCGGCGCTGCCACGCCGGGGCCTCCACCGCCTGGGC	ENSG00000113430|IRX4|16
CTGAGCCTGACCGGGCCATTCCCAAATTTGGGACGCGGAAGGAGAGGCTCTCGGAGCAGAAGAGGCCAGATACCCTGAAGCATAAAGTTTACGTCAAAAGTTTACATGGAGAAGGCGGTT	ENSG00000113430|IRX4|17
CCGTTCTGAAGCGTGGTCTGCTGTCCCCTGGGCGTGAGGCCTCCTGGGCCTGTCGGGCCTCCGATTTCATCCTCAGCACGTAATGCTCACCAACAGCACTTGCACTGAGTTGACTCTTGC	ENSG00000113430|IRX4|18
ACACTCTTGACTCCATAATATGATGCTTTTTAAGATGTATGTTCACACCAATAATTGCCTGCTTCAGAGGCTAATATAACAAAACCAATAAAACCGAGTGATGGTGTTTGTATTGCAAAA	ENSG00000113430|IRX4|19
GACCGCGGCGCCTGGGGACGCCGGCGCGCTCCGCTCGCCAGGTGCTCCGCCTGGAAATGTCTCCATTAGTTGTCGCCGGCTCCCCGCTGGAGCGCGCGCGCCGAGCTTCCGCGCGGAGCC	ENSG00000113430|IRX4|20
GGTGAGGTCCCCCGCTCCCGCCCCCGCCCCGGGGTTCCGAGACCCCTCCCCCCTTCCGAGGAGGCGGAGGCTCCGCGCGG	ENSG00000113430|IRX4|21
GCGGCGACTCCCCGGTGCGTCCCGGGCTGCGAGCTGCTCCCCGCGGCCCCGGCAGCCACACGGCGCGGGCGGGAGCTTCCCCAGCTCAGCGCCTAGAAGCCTGCAGCTCCGGAGCAGTGG	ENSG00000113430|IRX4|22
GCCAGCTCTGGGCCAGTACCCCTATGACAGGATCAAACGGCTAGGCGGTCATCCCCATAAAGGAATTGGCCTGGACCTCTCTGGCTTGGGAAGGAGCCCAGGCTCCCTGTATGGAACCAT	ENSG00000113430|IRX4|23
GAGTCTGCCGCCGCCGCAGCGCCTCCGCTCCGCCAACTCCGCCGGCTTAAATTGGACTCCTAGATCCGCGAGGGCGCGGCGCAGCCGAGCAGCGGCTCTTTCAGCATTGGCAACCCCAGG	ENSG00000016082|ISL1|1
GGCCAATATTTCCCACTTAGCCACAGCTCCAGCATCCTCTCTGTGGGCTGTTCACCAACTGTACAACCACCATTTCACTGTGGACATTACTCCCTCTTACAGATATGGGAGACATGGGAG	ENSG00000016082|ISL1|2
ATCCACCAAAAAAAAAACGTCTGATTTCCCTATGTGTTGGTTGCGGCAATCAGATTCACGATCAGTATATTCTGAGGGTTTCTCCGGATTTGGAATGGCATGCGGCATGTTTGAAATGTG	ENSG00000016082|ISL1|3
CGGAGTGTAATCAGTATTTGGACGAGAGCTGTACATGCTTTGTTAGGGATGGGAAAACCTACTGTAAAAGAGATTATATCAGGTTGTACGGGATCAAATGCGCCAAGTGCAGCATCGGCT	ENSG00000016082|ISL1|4
TCAGCAAGAACGACTTCGTGATGCGTGCCCGCTCCAAGGTGTATCACATCGAGTGTTTCCGCTGTGTGGCCTGCAGCCGCCAGCTCATCCCTGGGGACGAATTTGCGCTTCGGGAGGACG	ENSG00000016082|ISL1|5
GTCTCTTCTGCCGAGCAGACCACGATGTGGTGGAGAGGGCCAGTCTAGGCGCTGGCGACCCGCTCAGTCCCCTGCATCCAGCGCGGCCACTGCAAATGGCAGCGGAGCCCATCTCCGCCA	ENSG00000016082|ISL1|6
GGCAGCCAGCCCTGCGGCCCCACGTCCACAAGCAGCCGGAGAAGACCACCCGCGTGCGGACTGTGCTGAACGAGAAGCAGCTGCACACCTTGCGGACCTGCTACGCCGCAAACCCGCGGC	ENSG00000016082|ISL1|7
CAGATGCGCTCATGAAGGAGCAACTGGTAGAGATGACGGGCCTCAGTCCCCGTGTGATCCGGGTCTGGTTTCAAAACAAGCGGTGCAAGGACAAGAAGCGAAGCATCATGATGAAGCAAC	ENSG00000016082|ISL1|8
TCCAGCAGCAGCAGCCCAATGACAAAACTAATATCCAGGGGATGACAGGAACTCCCATGGTGGCTGCCAGTCCAGAGAGACACGACGGTGGCTTACAGGCTAACCCAGTGGAAGTACAAA	ENSG00000016082|ISL1|9
CTGGCAGTGAAGTAGCATCAATGTCCTCTCAACTTCCAGATACACCTAACAGCATGGTAGCCAGTCCTATTGAGGCATGAGGAACATTCATTCTGTATTTTTTTTCCCTGTTGGAGAAAG	ENSG00000016082|ISL1|10
TGGGAAATTATAATGTCGAACTCTGAAACAAAAGTATTTAACGACCCAGTCAATGAAAACTGAATCAAGAAATGAATGCTCCATGAAATGCACGAAGTCTGTTTTAATGACAAGGTGATA	ENSG00000016082|ISL1|11
TGGTAGCAACACTGTGAAGACAATCATGGGATTTTACTAGAATTAAACAACAAACAAAACGCAAAACCCAGTATATGCTATTCAATGATCTTAGAAGTACTGAAAAAAAAAGACGTTTTT	ENSG00000016082|ISL1|12
AAAACGTAGAGGATTTATATTCAAGGATCTCAAAGAAAGCATTTTCATTTCACTGCACATCTAGAGAAAAACAAAAATAGAAAATTTTCTAGTCCATCCTAATCTGAATGGTGCTGTTTC	ENSG00000016082|ISL1|13
TATATTGGTCATTGCCTTGCCAAACAGGAGCTCCAGCAAAAGCGCAGGAAGAGAGACTGGCCTCCTTGGCTGAAAGAGTCCTTTCAGGAAGGTGGAGCTGCATTGGTTTGATATGTTTAA	ENSG00000016082|ISL1|14
AGTTGACTTTAACAAGGGGTTAATTGAAATCCTGGGTCTCTTGGCCTGTCCTGTAGCTGGTTTATTTTTTACTTTGCCCCCTCCCCACTTTTTTTGAGATCCATCCTTTATCAAGAAGTC	ENSG00000016082|ISL1|15
TGAAGCGACTATAAAGGTTTTTGAATTCAGATTTAAAAACCAACTTATAAAGCATTGCAACAAGGTTACCTCTATTTTGCCACAAGCGTCTCGGGATTGTGTTTGACTTGTGTCTGTCCA	ENSG00000016082|ISL1|16
AGAACTTTTCCCCCAAAGATGTGTATAGTTATTGGTTAAAATGACTGTTTTCTCTCTCTATGGAAATAAAAAGGAAAAAAAAAAAGGAAACTTTTTTTGTTTGCTCTTGCATTGCAAAAA	ENSG00000016082|ISL1|17
TTATAAAGTAATTTATTATTTATTGTCGGAAGACTTGCCACTTTTCATGTCATTTGACATTTTTTGTTTGCTGAAGTGAAAAAAAAAGATAAAGGTTGTACGGTGGTCTTTGAATTATAT	ENSG00000016082|ISL1|18
GTCTAATTCTATGTGTTTTGTCTTTTTCTTAAATATTATGTGAAATCAAAGCGCCATATGTAGAATTATATCTTCAGGACTATTTCACTAATAAACATTTGGCATAGATAAATAAATAAA	ENSG00000016082|ISL1|19
CAGCAGCAGCCCAATGACAAAACTGCTAACCCAGTGGAAGTACAAAGTTACCAGCCACCTTGGAAAGTACTGAGCGACTTCGCCTTGCAGAGTGACATAGATCAGCCTGCTTTTCAGCAA	ENSG00000016082|ISL1|20
GGTGTGTAAACGCAAGATTCTAGAGAAGGAGAGCCCACTTCAGGAGTATCTTTACTGCTATGGAAATAGTATTTTGCTCAATTGCACACAGGCTTGCATGTGCCTAATTCTGGATACACA	ENSG00000016082|ISL1|21
ATTGCACACAGGCTTGCATGTGCCTAATTCTGGATACACACATGTGTAGAAGGAACTAATCATTTTTACCTTCTCTTCACTCTCT	ENSG00000016082|ISL1|22
GGACAGTTAGATTTCCACATCTCTCCTTGGAGAAGCAGGATGCCTCCTCCTGTTATGTGGATCTTTTCCTCTCTCTTCCATTCTTTCTGTTCGTAGGAATGCCCCAGCTTCTGTTATTCC	ENSG00000016082|ISL1|23
ACCTCCTTATTGGTGCTAGTTTGCAGCGCCCAGCTCCTGCGCCTTCGCTTCGCGTTTGAATCTGGCTCGCCCCTTCGTATTATGTCTGCACTCCGAAGGAAATTTGGGGACGATTATCAG	ENSG00000162989|KCNJ3|1
GTAGTGACCACATCGTCCAGCGGCTCGGGCTTGCAGCCCCAGGGGCCAGGCCAGGACCCTCAGCAGCAGCTTGTGCCCAAGAAGAAGCGGCAGCGGTTCGTGGACAAGAACGGCCGGTGC	ENSG00000162989|KCNJ3|2
AATGTACAGCACGGCAACCTGGGCAGCGAGACAAGCCGCTACCTCTCGGACCTCTTCACCACGCTGGTGGACCTCAAGTGGCGCTGGAACCTCTTCATCTTCATTCTCACCTACACCGTG	ENSG00000162989|KCNJ3|3
GCCTGGCTTTTCATGGCGTCCATGTGGTGGGTGATCGCCTACACTCGGGGCGACCTGAACAAAGCCCACGTCGGTAACTACACGCCTTGCGTGGCCAATGTCTATAACTTCCCTTCTGCC	ENSG00000162989|KCNJ3|4
TTCCTCTTCTTCATCGAGACGGAGGCCACCATCGGCTATGGCTACCGATACATCACAGACAAGTGCCCCGAGGGCATCATCCTCTTCCTCTTCCAGTCCATCCTGGGCTCCATCGTGGAC	ENSG00000162989|KCNJ3|5
GCCTTCCTCATCGGCTGCATGTTCATCAAGATGTCCCAGCCCAAGAAGCGCGCCGAGACCCTCATGTTCAGCGAGCACGCGGTGATCTCCATGAGGGACGGAAAACTCACGCTTATGTTC	ENSG00000162989|KCNJ3|6
CGGGTGGGCAACCTGCGCAACAGCCACATGGTCTCCGCGCAGATTCGCTGCAAGCTGCTCAAATCTCGGCAGACACCTGAGGGTGAGTTCCTTCCCCTTGACCAACTTGAACTGGATGTA	ENSG00000162989|KCNJ3|7
GGTTTTAGTACAGGGGCAGATCAACTTTTTCTTGTGTCCCCCCTCACAATTTGCCACGTGATCGATGCCAAAAGCCCCTTTTATGACCTATCCCAGCGAAGCATGCAAACTGAACAGTTC	ENSG00000162989|KCNJ3|8
GAGATTGTCGTCATCCTAGAAGGCATTGTGGAAACAACTGGGATGACTTGTCAAGCTCGAACATCATATACTGAAGATGAAGTTCTTTGGGGTCATCGTTTTTTTCCTGTAATTTCCTTA	ENSG00000162989|KCNJ3|9
GAAGAGGGATTCTTTAAAGTTGATTACTCCCAGTTCCATGCAACATTTGAAGTCCCCACCCCACCTTACAGTGTGAAAGAGCAGGAGGAAATGCTTCTCATGTCGTCCCCTTTAATAGCA	ENSG00000162989|KCNJ3|10
CCAGCCATAACTAACAGCAAAGAAAGACATAATTCTGTGGAATGCTTAGATGGACTAGATGATATTACTACAAAACTACCATCTAAGCTGCAGAAAATTACTGGAAGAGAAGACTTTCCC	ENSG00000162989|KCNJ3|11
AAAAAACTCTTGAGGATGAGTTCTACAACTTCAGAAAAAGCCTACAGCTTGGGAGACTTGCCCATGAAACTTCAACGAATAAGTTCAGTTCCGGGCAACTCAGAAGAAAAACTGGTATCT	ENSG00000162989|KCNJ3|12
AAAACCACCAAGATGTTATCTGATCCCATGAGCCAGTCTGTGGCTGATTTGCCACCAAAGCTTCAAAAGATGGCTGGAGGAGCAGCTAGGATGGAAGGGAACCTTCCAGCCAAATTAAGA	ENSG00000162989|KCNJ3|13
AAAATGAACTCTGATCGCTTCACATAACAAAGCACTCCCTTAGGCATTATTTAATGTTTGATTTAGTAATAGTCCAATATTTGGCGATGAGGTAATTCTCCCTAAGGAATCTGAAAGTAT	ENSG00000162989|KCNJ3|14
ATTTTCCTCCCAGTTCTACAAGCATATTTGAGAACCCTTCCTTTCCCAAGTATTGCGAATGTGCAGAAAGCAACAGTTACGGAGGGAGGACATCATAAGGAAGTTATTAACGGGCATGTA	ENSG00000162989|KCNJ3|15
TTATCACATCAAGCATGCAATAATGTGCAAATTTTGCATTTAGTTTTATGGCATGATTTATATATGGCATATTTATATTGTATATTCTGGAAAAAAAATATATATATATATTTAAAGGGG	ENSG00000162989|KCNJ3|16
AGATACTCTCCCTGACATTTCTAACATATGTATTAAGCCAAACATGAGTGAATAGCTTTCAGGGCGATAAAACTAAATATATGTCTGTGTGTGTGTGTGTATGTATACACACATATACAT	ENSG00000162989|KCNJ3|17
ATATATATACACATACATACACATACATACATACATACATATATATCTGATAAAATTGTGATGTTTTGTTCAAAGTTGTAGTTCTTGTGCATGTTTACTTTATTAGAGTAGGAAGGCTAC	ENSG00000162989|KCNJ3|18
TGGCATTAATTATTAATACCAAATATTTTAGCCTTAAATTTTTGTCATTTTAAAATCTGATTTAATGTTTTCTGCTGTTTAAGGTCTTGGGAGGCTTTCAATTGTATTTTATATGAGAGA	ENSG00000162989|KCNJ3|19
TAGAGCATACCAGTACTCAGTATAGCATTGAACATTTCTTATGATTTTTAAAAGTTGCTAGTACTGGGGAGAAATAATTGTTGATTAATTTGAGAATTATTCCTTTCCTAGACTAATTAA	ENSG00000162989|KCNJ3|20
AATCTGGAAATCTGTTTTGTATATGATCTAATACAAAGATGAGCTCTGAACAAACACTGAATCATGTTAATAGACAGTAGCCAAGTTATATTGAATATATCAGAATCTGTGTGAAGTTAC	ENSG00000162989|KCNJ3|21
ACAATTAATTGTCCCTGTTTCAAACTGAGTAAATTGGAAACATTTTCTTTCTTTTTCTGGAAATTTTGTCCATTTTAAAAACCAATCATTTTAAGAAGACATGACAATGCAATGAAACAG	ENSG00000162989|KCNJ3|22
ATGATAAATATTTATGCTTAAAATATGTATGTCTAATTGAGTCTCTTTTTTATTCTGTTTTCTTGTTTATGGCATTTGTTGTAACAGGATAGACTTTTTCCTCACCTAGGAAACCTATCC	ENSG00000162989|KCNJ3|23
CATGCCTGTCACTTATAGTTCAGGAGGAAGTTTTTGCACAGACCAGAGAGAAATTAAAATTAGATGATAAATTGAAGATATCTTACACACAGTTTTTTGGTGAACACTGATTTTATTGGT	ENSG00000162989|KCNJ3|24
GTCTTAGATCCCTAGTCTACCCAAATAATTTTAACAGTACTGTTTTTTCTAATCCTGAAGTCTGATATTTATGACTCATTAGCAGGAATCAAAACTAGTGATCAGTAGAACACTTTCAAA	ENSG00000162989|KCNJ3|25
ATAAAAATTTGGAATGCAGACTTTTATGAAAATTTAAAAGTGCTCCTTAACAGAATATCATGGGTTTTCCTATAAAACTTCTTTAAGTATTGTAATTCCAGTCTGCCCCAACTTTAAAAA	ENSG00000162989|KCNJ3|26
AAATTCTTATTAATATGTCAGTCATTAATTGCTAGTTTGGGCTCTCATTATTTCCTGTTTTTTAACAATTTTGTGATAATTTTATTATTGGCAAATTAATACATCAACACTTAAATCATT	ENSG00000162989|KCNJ3|27
GACTATAATAATACCTTCTGGCTACCTCTGTATCAACCAAATTCTGTAGGTGCAAACATATACCAGGGAATTCTTACTGGCAAAATGATCAATCTGGAGTGTGCATCCACTGTGAATGGA	ENSG00000162989|KCNJ3|28
GCAAATTGCCCTATACCCATTGATAACCTAGCTTTCTTAGTTTGTAGATGTAGGAAACAAAATAGTGACAGAGAGAGAAGGGGGTCCACAGGGCATGGTATATTTATCAGCAGTGGAAAA	ENSG00000162989|KCNJ3|29
AAAGTGCATAGATCATTTAGTCCAAGAACTTAAAACTAAATAGAGCCATAATTTACTTTGGAGAGTCATTTTAATTTGTCTTTGGTACCAAGGAGAAGACGGAACCAAAAACAAACTCTC	ENSG00000162989|KCNJ3|30
CAAGTATATTCACACATTCAACAAAATTTTTGCATGCCTTCTATGTCGTAGGCATTTTTAGTTCCTGGGGATTTGGACATGGCTAAGTCAGAGAAGGCCATTGCTCACCATGAACACTGT	ENSG00000162989|KCNJ3|31
ATACCAGAAGGAGAGTGGGGAGGAGACAAAAAACAAATAAGACCACTTCAGACAATCAAAGTATCAGTTAAGAGAATGAAAACAGGCCTGACTCAGTGGCTCACGCCTGTAATCCCAGTA	ENSG00000162989|KCNJ3|32
AAAAAAAAAAAAAGAATAAAAACAGGGTAACATAATGCAAAGTAACTGTGTGGAATAAAAATTGATTATTTTAGAAAATGTGACTGGCTTAGGACGGGGATAATATGTGAACAGAAATCT	ENSG00000162989|KCNJ3|33
TGACTGGCTTAGGACGGGGATAATATGTGAACAGAAATCTATCTCATGAGAAAGTGCTACTGTTGTCAAAATTACCTTATCTGAGTGAATGGTATTTTTTTTATCTTTTCCACACATGCG	ENSG00000162989|KCNJ3|34
TGGGAAAGGTATGATTTCTGCATGTAATTGCAGTTTAACCCTTATTTCTAGGTTGATCATAGGTCCCAGTTTACCCAGGAAAATTCCAGTTTATACCTGTTGTACCTGTGTAATTATTGG	ENSG00000162989|KCNJ3|35
TAGCACTCCCTTTCACTCTTACAATGTCTTGGTTTGGATGATATATGGTGAAGTTTTTGTTGAAACTAAATTATGAAGTCTGATATATTTGGATAAAAATAAAGAATTGCTTTTCTTCTC	ENSG00000162989|KCNJ3|36
ATTGGCGCCCATCGTGGTACACCAGGAAAAGTGGGAACGAGGAAAACAGCCGTGAGCGCAGAGTGCGAGGCCAGGCTGCCGCTACCGCCCGCTGCGCCGCCTCCTGCCCTCTCCCGCTGG	ENSG00000162989|KCNJ3|37
ATTCTGGTCGGAATCCACCTCTCCGCCTGTGCAACACACACTTTACACACGCACGGGGACTGCAAGCGGGCAGCATCGATCGTGGCTCCTTTAAGACAAACTCAGACAGACATTTTTTTT	ENSG00000143995|MEIS1|1
AACCCTCCTTCTCTAATCTCCTTCCAGTGCAGCACTTGCAAAGAGGGAGAGAGAGGGAGAGAAAGAAAGAGAGAGAGAGAAGAGAGAAACTGATTAGGAATTAGGACTGATTCAAGGGAA	ENSG00000143995|MEIS1|2
GCGAGCGCTAGGGCTTTGTGCATTTGAATATTAACATTTGAGGTGTTCTGACCAGAAGAAGACAGAGCGGATGATCATTCATTCACCACGTTGACAACCTCGCCTGTGATTGACAGCTGG	ENSG00000143995|MEIS1|3
ACCACGTTGACAACCTCGCCTGTGATTGACAGCTGGAGTGGCAGAAAGCCATGAGATTTGGTAGTTGGGTCTGAGGGGCGCTCTTTTTTTTCCTTTTCTTTCTTTCTTTCTTTTTTTTTT	ENSG00000143995|MEIS1|4
TTTTTGCCCCCGCTGCTGTCTTGGAAACGGAGCGCTTTTATGCTCAGTGACTCGGGCGCTTTGCTTCAGGTCCCGTAGACCGAAGATCTGGGACCAGTAGCTCACGTTGCTGGAGACGTT	ENSG00000143995|MEIS1|5
TTTTTTTTTTTTTTTTTTTTTTTCCGGGGGAGTTTGAATATTTGTTTCTTTTCACACTGGCCTTAAAGAGGATATATTAGAAGTTGAAGTAGGAAGGGAGCCAGAGAGGCCGATGGCGCA	ENSG00000143995|MEIS1|6
CCAGAGAGGCCGATGGCGCAAAGGTACGACGATCTACCCCATTACGGGGGCATGGATGGAGTAGGCATCCCCTCCACGATGTATGGGGACCCGCATGCAGCCAGGTCCATGCAGCCGGTC	ENSG00000143995|MEIS1|7
CACCACCTGAACCACGGGCCTCCTCTGCACTCGCATCAGTACCCGCACACAGCTCATACCAACGCCATGGCCCCCAGCATGGGCTCCTCTGTCAATGACGCTTTAAAGAGAGATAAAGAT	ENSG00000143995|MEIS1|8
GCCATTTATGGACACCCCCTCTTCCCTCTCTTAGCACTGATTTTTGAGAAATGTGAATTAGCTACTTGTACCCCCCGCGAGCCGGGGGTGGCGGGCGGGGACGTCTGCTCGTCAGAGTCA	ENSG00000143995|MEIS1|9
TTCAATGAAGATATAGCCGTGTTCGCCAAACAGATTCGCGCAGAAAAACCTCTATTTTCTTCTAATCCAGAACTGGATAACTTGATGATTCAAGCCATACAAGTATTAAGGTTTCATCTA	ENSG00000143995|MEIS1|10
TTGGAATTAGAGAAGGTACACGAATTATGTGACAATTTCTGCCACCGGTATATTAGCTGTTTGAAAGGGAAAATGCCTATCGATTTGGTGATAGACGATAGAGAAGGAGGATCAAAATCA	ENSG00000143995|MEIS1|11
GACAGTGAAGATATAACAAGATCAGCAAATCTAACTGACCAGCCCTCTTGGAACAGAGATCATGATGACACGGCATCTACTCGTTCAGGAGGAACCCCAGGCCCTTCCAGCGGTGGCCAC	ENSG00000143995|MEIS1|12
ACGTCACACAGTGGGGACAACAGCAGTGAGCAAGGTGATGGCTTGGACAACAGTGTAGCTTCCCCCAGCACAGGTGACGATGATGACCCTGATAAGGACAAAAAGCGTCACAAAAAGCGT	ENSG00000143995|MEIS1|13
GGCATCTTTCCCAAAGTAGCCACAAATATCATGAGGGCGTGGCTGTTCCAGCATCTAACACACCCTTACCCTTCTGAAGAACAGAAAAAGCAGTTGGCACAAGACACGGGACTCACCATC	ENSG00000143995|MEIS1|14
CTTCAAGTGAACAATTGGTTTATTAATGCCCGGAGAAGAATAGTGCAGCCCATGATAGACCAGTCCAACCGAGCAGTAAGTCAAGGAACACCTTATAATCCTGATGGACAGCCCATGGGA	ENSG00000143995|MEIS1|15
GGTTTCGTAATGGACGGTCAGCAACATATGGGAATTAGAGCACCAGGACCTATGAGTGGAATGGGCATGAATATGGGCATGGAGGGGCAGTGGCACTACATGTAACCTTCATCTAGTTAA	ENSG00000143995|MEIS1|16
CCAATCGCAAAGCAAGGGGGAAGGCTGCAAAGTATGCCAGGGGAGTATGTAGCCCGGGGTGGTCCAATGGGTGTGAGTATGGGACAGCCAAGTTATACCCAACCCCAGATGCCCCCCCAT	ENSG00000143995|MEIS1|17
CCTGCTCAGCTGCGTCATGGGCCCCCCATGCATACGTACATTCCTGGACACCCTCACCACCCAACAGTGATGATGCATGGAGGACCGCCCCACCCTGGAATGCCAATGTCAGCATCAAGC	ENSG00000143995|MEIS1|18
CCCACAGTTCTTAATACAGGAGACCCAACAATGAGTGGACAAGTCATGGACATTCATGCTCAGTAGCTTAAGGGAATATGCATTGTCTGCAATGGTGACTGATTTCAAATCATGTTTTTT	ENSG00000143995|MEIS1|19
TGACTGTGGAGTTCCATTCTTGGCATCTACTCTGGACCAAGGAGCATCCCTAATTCTTCATAGGGACCTTTAAAAAGCAGGAAATACCAACTGAAGTCAATTTGGGGGACATGCTAAATA	ENSG00000143995|MEIS1|20
ACTATATAAGACATTAAGAGAACAAAGAGTGAAATATTGTAAATGCTATTATACTGTTATCCATATTACGTTGTTTCTTATAGATTTTTTAAAAAAAATGTGAAATTTTTCCACACTATG	ENSG00000143995|MEIS1|21
TGTGTTGTTTCCATAGCTCTTCACTTCCTCCAGAAGCCTCCTTACATTAAAAAGCCTTACAGTTATCCTGCAAGGGACAGGAAGGTCTGATTTGCAGGATTTTTAGAGCATTAAAATAAC	ENSG00000143995|MEIS1|22
TATCAGGCAGAAGAATCTTTCTTCTCGCCTAGGATTTCAGCCATGCGCGCGCTCTCTCTCTTTCTCTCTCTTTTCCTCTCTCTCCCTCTTTCTAGCCTGGGGCTTGAATTTGCATGTCTA	ENSG00000143995|MEIS1|23
ATTCATTTACTCACCATATTTGAATTGGCCTGAACAGATGTAAATCGGGAAGGATGGGAAAAACTGCAGTCATCAACAATGATTAATCAGCTGTTGCAGGCAGTGTCTTAAGGAGACTGG	ENSG00000143995|MEIS1|24
TAGGAGGAGGCATGGAAACCAAAAGGCCGTGTGTTTAGAAGCCTAATTGTCACATCAAGCATCATTGTCCCCATGCAACAACCACCACCTTATACATCACTTCCTGTTTTAAGCAGCTCT	ENSG00000143995|MEIS1|25
AAAACATAGACTGAAGATTTATTTTTAATATGTTGACTTTATTTCTGAGCAAAGCATCGGTCATGTGTGTATTTTTTCATAGTCCCACCTTGGAGCATTTATGTAGACATTGTAAATAAA	ENSG00000143995|MEIS1|26
TTTTGTGCAAAAAGGACTGGAAAAATGAACTGTATTATTGCAATTTTTTTTTGTAAAAGTAGCAGTTTGGTATGAGTTGGCATGCATACAAGATTTACTAAGTGGGATAAGCTAATTATA	ENSG00000143995|MEIS1|27
CTTTTTGTTGTGGATAAACAAATGCTTGTTGATAGCCTTTTTCTATCAAGAAACCAAGGAGCTAATTATTAATAACAATCATTGCACACTGAGTCTTAGCGTTTCTGATGGAAACAGTTT	ENSG00000143995|MEIS1|28
GGATTGTATAATAACGCCAAGCCCAGTTGTAGTCGTTTGAGTGCAGTAATGAAATCTGAATCTAAAATAAAAACAAGATTATTTTTGTCATGCTGACTCCACTGCTTGAAAAATTTGTTT	ENSG00000143995|MEIS1|29
ACTGCCCCCCAGATTTTTAAAGATTAATACAGTAAATATAAAAATTAATTTTGGCTCCCTAAGCCATATATGTATTTGACAATTTTAACCGCAAAGTAAGTTGTTTAATAATAACCACTG	ENSG00000143995|MEIS1|30
ATTTCTTTAAGCTGACTTAATGAACTCCTAATATCAGCAAATTTGAGGCCTAAAGGCACTAAACTAACTCTAGACTCAGAATTACATCCAACAGAATTACTCATCTAATATCAGTGAAAT	ENSG00000143995|MEIS1|31
TATTCTTGCACATAAAGGCAAACCTAAGTACAAAGTTAAGTCTTTTACTAAAGGATGTTACCTAGGATGAGCAGTATATGTTTATTAGGAAATTAACTACATGAATTGAAGAGACCAGAC	ENSG00000143995|MEIS1|32
TTCAAAATCTAATTTTTATAAATATGCTCTATGTTCTCATTGGATAAAACTGGTTATTAACCAATTTTCCAGAACAGCTGTACAAGATTTCTGCATGGCAGCCGGCTAAATGGTAGAAAA	ENSG00000143995|MEIS1|33
TAATATGTTTAAGCTGGAATAGCTTATAATTTTATTTAAATAAAATTGCTGCTATAAAAAGTGCTTCCCAAAGCTAAGGAAAATATACAAATATTTTAATTAAGGCAAATTCGTTTTAAA	ENSG00000143995|MEIS1|34
AAATAAGCCTTTCAGTAGTGATTGCTTTGTAAACAAAGGATGGGTCGGAGGAGAGAGAGCCTTAAACTCAAGTCTGACATTCAGGCCCAAGTCACCCTATAAACCGGCCCTTAGCAATTC	ENSG00000143995|MEIS1|35
TATTTTCTATTCGAAAAGAGAAACCAGCTGTGGGTTGGCTTTACTAGGTGATGTGTGATTGACTGACTCACCTGCTGGAGTAGCAATGCATTCTCACCTTTTGCTGATGGGGCCTTGTTT	ENSG00000143995|MEIS1|36
CTAAACACGTGGATGCGCAGAGAGCAAGGCTCAGCCTACTGCAGCCATCTCTGGCAGCGCTTCTACCCCTCCCCAGCCCATAGATGGGATTGTTTAAATCTCCCTTGTTGACCTAGTGGC	ENSG00000143995|MEIS1|37
AATTCTTCCTCTACCTAAATAGTCGATGTGAGTGAAATCATTCTCTTTTGATAGGTGGTTGCTAGCAGTTAACAACCATTTATTTACTTTAACAATTAATAATAAACTTTATAAACTGTC	ENSG00000143995|MEIS1|38
GAGACATGCCCGTTTCACCTTCTACCCTCGGGAGAATGCTTCTCTTTCTCTCTTTCTTTCTTCTTTCCTTCTTGCCAAAGGAGCCTGAATTTCTAAACTAGTTGATAGGGACACAAGTTA	ENSG00000143995|MEIS1|39
GGGCAAGATCATTCATCCCAGACGAGTCTCGCTGAGAATTCTGTATTTTTTACTTAAAGCTTTAATTTTAAAATAAGAAAAACTCAGCTTTATAGATGCAAGGCCACCGAATTCCGGGTG	ENSG00000143995|MEIS1|40
GAAGGACCCAGCTGTATTGACCTTATATAAGCTCGGTGCCTTGCCGTTCTCCCATTTGCCCGCCTGGCCTCCTGAACCTTCTTTCTCTCCTGTTTGTCATGCAGTACGACGATCTACCCC	ENSG00000143995|MEIS1|41
CACTTTCAAAAGTAGCCAGCACGTAGTCGGCCTTAAGCCATGCATGTTACCTCCAACCTCAGATTTTCTCTCTGTCTGAGTGTCTGTTTGCAGATAACTTAAAATCACCCATCTGCATCC	ENSG00000143995|MEIS1|42
CCACTCACCCTCCAGAAAGCAAACGTGGAGAGCTCACTCTGCAGAATAAAATCAAGAACACCACGGTTGTAGCTGCTGTGGACTCGGCGGTCTGAGCAGCCTCCCCGAGAGCCGTAGTTG	ENSG00000143995|MEIS1|43
CCCTGCTGATCGATTATTTGATAATTGATTTTCCCCGCAGCCAATGCGCGGCGGCCTGGGCGGGGGCGCCTCCTGATTGGCCGAGCACTCCTCCACGGCTGCCTACCGAGATTTGGTACG	ENSG00000143995|MEIS1|44
TCATTTTTGACTCCAAGAGTGTCATCCCCTCATCAACACAGGTAAATCCGCCTCATCCTTTTCTGTTATCTCAAGCTGGCTGCCTTGCCTTGTCTGCTATCTGTGCATCTAAGATATTGC	ENSG00000143995|MEIS1|45
AGAGGGGAAGCCAGGATCTTTATGCACTGAAGATCTCACTATTTCTCAACCCTCTAGATCCTGTTTTTTTTTTAAGGGTCTTTTGGCACTATCTGTTGACTTTGCTCATTTTCTGGCCTC	ENSG00000143995|MEIS1|46
TTCTTGGATTTTTATCTCCCTTCTAGGACCTATGAGTGGAATGGGCATGAATATGGGCATGGAGGGGCAGTGGCACTACATGTAACCTTCATCTAGTTAACCAATCGCAAAGCAAGGGGG	ENSG00000143995|MEIS1|47
AAGTAAGTACAAATGGGGTCTTTGTTTTCACTTTGTCCTAGGAATATTTTTCCTCTTGCATTTTCTTATGTTCTCCTTGCCCATAGCTTCATGCTTGTTCATTCCTTTCCATTAAACTCC	ENSG00000143995|MEIS1|48
TGGTTTCTTGCTTCCATCATTTTCTTTTTGGTTGTGATCAAGCTTTTAAGCTTATAAATACTGTGTATGATGTACATTTATCCTGTGTGTTGCTATTGTACAGTACTGACCACATGACAA	ENSG00000143995|MEIS1|49
AACAAGAAGCAGTCAGGAGGTGGGGGAGTGGGTTGTCATAGCAACAGACTGATTTGCAAAATGTAAGCAGTCTGCAGCAGTGCAAGGAGAGGGAAGAGCATGTCCCCAAAGTGTCATAAA	ENSG00000143995|MEIS1|50
TCTGTCTAACCGCAGTTGATGCATGAGTTACATTTCTACACTAACCTGCAAGACACCGAAAAGCTAAACAGAGACTTCTTTTAGGTAAAATAAACACAAGCTTTACTTAGGGTAAGTAAA	ENSG00000143995|MEIS1|51
GGCATATTTTGAGCTCCAGTCAACTAAACTTTGATTTTTTTTCTTAGTTTATTCCTTTGTCTGTCCATCATAATGGGATTACGTGTGGCAATGGGAAAAGGGAGAATACAAAATAGAGGT	ENSG00000143995|MEIS1|52
GTGCACAGCAGGCTGCGGGGCTTAGCCCAGGCTAATTGACTATATCCAAATTAAGTATGCCATCACTTGCAGTGTGACAAATGGATTTGACTTATTCAGTATACAAAAATAGAGATCATT	ENSG00000143995|MEIS1|53
TTCTCTCCTATAAAGACACTCCAGCAATTCGAGTTCAAACAAGTAAAACTGTTTTGAACACCAAGGCTCTTGTTCACTTCCTAAATTACCCCTAATAGCACTGTTCTTGCTTTGTTTTTG	ENSG00000143995|MEIS1|54
AAATTAAAAGCAGTTATTTCAGAGTCTTGCTTGTGTCTCTGATTATATTTATGCACTATTTAAAATCACTGCTGAGGCCAGGGGTAATTCGTACTGGTCATCTTCTCTGGGTGTGAGTCA	ENSG00000143995|MEIS1|55
AATATAAGTTTAACAATTAGCTCTGAAAACATTCCATTGAGCTGGGGAATGCAACAGTCTTATTACCTCATCATGGAATTCTCTAGCTTAGTTAATTTAAATATTGTTTCTTAGTTTCTG	ENSG00000143995|MEIS1|56
GGTCAATTAAATTTAAATGATGTATTTTATGCTTCGTGACCAATTAAATTACTAGGTTATTACAAAAAAAATTATCATCTTTTTTGATTAAAGAGCTGTGGGTACAGTATATTTTATAAG	ENSG00000143995|MEIS1|57
CAATTTTCATTAGTTCAAAAATGTTCCTTTAGGCTAGATTAAGCAGCCATTCATTGTTAGAGCCTGGAGACCTTATTCGAAGGTGTTCATCGTATTCACAGTGCACTATTACTTAGAACT	ENSG00000143995|MEIS1|58
AAAGCCAATTGAACCTACTTAGCAATAGCGTTATGCCTTTCACCCTTGATGATTATGGAGCTTATAGCTCTCAGAAACAATACACCTGTCAGTTTCCATCAACTATAGCAATCCATGCAG	ENSG00000143995|MEIS1|59
AAGACAAGAGGCCCCCTCAAAGCAGGAGGGGTATTGTTTTAGGTCCAATTTTTCTTATTGTTCTCAAAATCATTATAAGGTGGACAGTGTTTTGTGAAGATTTTCTTTTCCCCAGCTCTA	ENSG00000143995|MEIS1|60
AGAAACCATGTGGAAAGAATTCATTGATAACTGTTTTGATTTTTTTCTTTTTTTAAGTACAGGTTTTGCTAAGTAATCACCCTTAGTGAGCCTGTGTAGTTCAGCTGCCTGTGAGATGTT	ENSG00000143995|MEIS1|61
TGGTGACCAGCTCAGTGTATTCTTGTATTCTTGATAGAGAATATTTCAGGAGACAAAAGTGCTTCTTCAGACCAGACCTCAAATAACAATTTTATTCTTTTTAATAAATAAGACCTCAGT	ENSG00000143995|MEIS1|62
AGGCGGACCTGATAACAGTGACAATGAAAGGAAAATAGTGGCAAAATGTGAGTTTCCAGCATGATGTTTCTCATTTTATTTTCTTCTGTATGAATCAAAAGAATGCTTTACAAAACCATG	ENSG00000143995|MEIS1|63
TTCCCTTAATCACAGGGTTCTCTGGCTTTTATAGGATTGTCATAGCCAGGACCACACTATTGCTTTTTCATAACATTTTCTTTTTGTTTCTTTCTTTTGAATTTCTTACAGGGCTGCAAA	ENSG00000143995|MEIS1|64
GCGCTTTTCAATTTCAACATCCCTGGGAAAAAAAAAAATCTGTATGCATATTGCTTGCTGGGTCACTACCACCTCCTTTTATTATTTGCATATGATTAAGTCCCTTTTAGATACATTTCC	ENSG00000143995|MEIS1|65
ATCGAAATGAAAATTTTTGAATAATGTGGCTATTATTGCTTCATTAAGGCTGGCTCTGGGATTCGACCTGAAGAGATGAGCTTGTAAAAGCTTTGCTAGCAAACTTGACCTGTTTCTTGT	ENSG00000143995|MEIS1|66
CGCTTTTAATTTTTGTCTTTATTTTATTTACCCTCTATAATAATGGGAGTGTTAACTGCCAGTGACCGCCTCTGATTGTAGGGGCTTTGTTCCGGAGCATTTTTCCCCCTTCTATCTTCA	ENSG00000143995|MEIS1|67
AGAAAAGACAAGTGTAGGGTCTGCTTATTTCTTATTTTATTAGGAATAAATCCAAGATAGGTGGTCTAAGAAAGACAGCGAGAGTTTGAAATCTAGCAAATGCTGGCTATTTTCTCCCTG	ENSG00000143995|MEIS1|68
TCTGTACGGTTCATTAGCCTGTCTTGTCAGTTTTCCTCGGCCGAACGCTTCTAGACCTCACTGAACATTGCTTTGTGTGGTGTTCACTGCAAGCTCACCCATTTTATTGTACTTAATAGA	ENSG00000143995|MEIS1|69
AAAAATAAGACCAGGCCGAGGTTATAAAAACAGATAAATATGGACTTTTCTCCTCCTTCTTTCCACTCATCCTCCAGCTGGTATGTGCTCTGGGCCCTCTGGGTTGGCAGCTTGTGGACA	ENSG00000143995|MEIS1|70
ACAGATCATAGCGGAATCAGAATTTCCAGCAAGGAAAATCTTTTCATGGTGAATTAAGTGGTGGATGAAGAAAAATGGTGATGAAAAAAGCCCTCTTGGAACAGAGATCATGATGACACG	ENSG00000143995|MEIS1|71
GCATCTACTCGTTCAGGAGGAACCCCAGGCCCTTCCAGCGGTGGCCACACGTCACACAGTGGGGACAACAGCAGTGAGCAAGCACCCTTACCCTTCTGAAGAACAGAAAAAGCAGTTGGC	ENSG00000143995|MEIS1|72
ACAGGAGAGCAGTATTCAGTTCTGGGGAAAGAAAGGGCTGGGCCAGGGGAGGGGAAGAGAGATTCCCAGCCAGCTGATGTTGGAGAGAAGACTAGATCCAGAAGAGGACCAAGAGCAGAG	ENSG00000143995|MEIS1|73
GGAGGTCCGCTACCTGGTAAATAAACTGGGAGTGAGTATAGGAACGCCTGGCAATTAAAATTAAACCAGTTTCGTTTCATAACAACACTAATCAATTTAACATCATTATAAAACGTTTGG	ENSG00000143995|MEIS1|74
AGAAGGTGGAAAAAAAAAGCCAACAGAGAAAAGTAACTCTTAAATAATATGCTCAGTTACAATATTCTTTGTACACATTCAATATATTAATGTTATTTTTTTTCTGAGTTTGCCTTCCCA	ENSG00000143995|MEIS1|75
GCTCTTTCTGCTACTATGACCACTCCCTGGTGCATGGCTTGGTGTGGAATTGCTGTAAACTTTATTACCTGTCAAAAGGGCAAAGGGGTCAGGATTGCTTGTGGGACTCAGTAAAGTTCA	ENSG00000143995|MEIS1|76
AAGACATTCAATGAGGTAGAGCTTTTGTGTGCTTTAATAACCCAAGGCAGCTTACTTCTGAAGCAGCTTTTCATGTACAGTTAAAACACGGGATTCAGGTAGTGGTATAAATACATGGTT	ENSG00000143995|MEIS1|77
CTTATTTCTCAGACCTTCTCTTGTTAATATCCATCTTCTGGTGTTCGACTTTTTTTTTTTTTAATAACAGTCTTTTTGTTTTGTTTTTAAATTATGAGCTTAAAATGGCGATACTTCTAT	ENSG00000143995|MEIS1|78
GGGATCCTGGCTTGTGGATCTAAAAATCCAAGAAACATCTCTCTAGGATTTGTTTTTGCATTATAATATGCCAGTAAGATAACAAGAGTATTTGCTAGGGGTGATGTGAGTCTTTACTTT	ENSG00000143995|MEIS1|79
CTTTATGAAATACTCTCTCATCTCTTAGGGAGCACTATGGAAAACTATGTTAGCATCGCATTGAGGCAACACACATTTACTCCTGTAACTTTTTTTCTTCCAACACCCATTATGTGGTCA	ENSG00000143995|MEIS1|80
CCAGACAAAACCCAAGCAGAAAGTTTCCACACCTTAACTGTTCCCTCTTTGAGCTAGATGTTTTAAAAACTCAGTCACAGAGGTGTGTAGATCTAGTCTGAGAGAAATTTCACTTTGAAT	ENSG00000143995|MEIS1|81
AGGACAATTGCCCTGTGTTTCCCCTATTTGGAAGTTTGGATCTCACAAGGGGGGTGGATTGCACTTGTCAATGTCATTTATGCACTCCTGATTATATTCCCATTTTTTTATTTCTGTCAT	ENSG00000143995|MEIS1|82
GGAGAAGTCAGCTCCAGGAATGAAGTCACTGCTGACATTTTACAAATGTGGTTCAGAGCTGCTGCCTGCTGCCGTGTGGTCGGCCGGCGGTTCTCCAAGTTTGTTTAGTGATCTCAAAAG	ENSG00000143995|MEIS1|83
GTTGACAGTCGGCCCCACGGCCATGGACGTCCTTTCCCCAAGTTAGCTGAGCGCCTGCCACCGAGATCCCCCGAGCCTGGGCTTCGCGCGGCCGCCTAGGAGGAACCCGCAGGAACCAGC	ENSG00000143995|MEIS1|84
CCTCCCCAACTCTCCGCCCGGCGCCTTTCTCCTCCACCGGATCCTGGATGTGCAGTGGAGGGGACGAGGGCTTGTCGGGTGGGAAACTTAATTCAAAATGGCTGCTGGAAACGCTTGGGT	ENSG00000143995|MEIS1|85
TTTATTCGTAGCAAATGTTGCCAATTTCTCCGGCCAGATACGCTAAACCGATCCTCAGATACCGTCCATGGCTCAGGGCCTCCGACTTCAGGGCTCCAGGAGGAAGGGGAGACACCCCCT	ENSG00000143995|MEIS1|86
GAAAAGGGCAAAGGTTTATTAATGCCCGGAGAAGAATAGTGCAGCCCATGATAGACCAGTCCAACCGAGCAGTAAGTCAAGGAACACCTTATAATCCTGATGGACAGCCCATGGGAGGTT	ENSG00000143995|MEIS1|87
TTTGGCTGAGCTCGTGGCGCTGTTGGCCTATGCGCCTGGGCTCGCTTGTGTGACCCCCTGGGGCTCACCCAAGTTTCAGCTGGTCGGAGGACAGCAAACCCAAGAACAAGGAGCACTGAT	ENSG00000143995|MEIS1|88
AGACCGGTCTTCCCGTGCCTGCAGGTTGGCTGCAAATGTTTCTGTACACGGACAACTGGTCCGGGACAAGATCCCGGGGAAATAAATTCATCTCGAGAGGGGCCGGGCGAGCCAGCGCGG	ENSG00000143995|MEIS1|89
GGAAACGCGAGCTTTTGTTTTTTATGACAGCCGGGCTGCGCAGCTCTAATCAGCGCGGGGATTTATCTCCCGGCCTGTCAGCATGTGTGCTTAAACTTTGCGGACTTCCTAGCCCTCTAA	ENSG00000143995|MEIS1|90
GCAGCAAAAAAGTTTGAGTCGCCGCTGCCGGGTTGCCAGCGGAGTCGCGCGTCGGGAGCTACGTAGGGCAGAGAAGTCATGGCTTCTCCGTCCAAAGGCAATGACTTGTTTTCGCCCGAC	ENSG00000120149|MSX2|1
GAGGAGGGCCCAGCAGTGGTGGCCGGACCAGGCCCGGGGCCTGGGGGCGCCGAGGGGGCCGCGGAGGAGCGCCGCGTCAAGGTCTCCAGCCTGCCCTTCAGCGTGGAGGCGCTCATGTCC	ENSG00000120149|MSX2|2
GTCCGACAAGAAGCCGCCCAAGGAGGCGTCCCCGCTGCCGGCCGAAAGCGCCTCGGCCGGGGCCACCCTGCGGCCACTGCTGCTGTCGGGGCACGGCGCTCGGGAAGCGCACAGCCCCGG	ENSG00000120149|MSX2|3
CTGGTGAAGCCCTTCGAGACCGCCTCGGTCAAGTCGGAAAATTCAGAAGATGGAGCGGCGTGGATGCAGGAACCCGGCCGATATTCGCCGCCGCCAAGACATATGAGCCCTACCACCTGC	ENSG00000120149|MSX2|4
ACCCTGAGGAAACACAAGACCAATCGGAAGCCGCGCACGCCCTTTACCACATCCCAGCTCCTCGCCCTGGAGCGCAAGTTCCGTCAGAAACAGTACCTCTCCATTGCAGAGCGTGCAGAG	ENSG00000120149|MSX2|5
TTCTCCAGCTCTCTGAACCTCACAGAGACCCAGGTCAAAATCTGGTTCCAGAACCGAAGGGCCAAGGCGAAAAGACTGCAGGAGGCAGAACTGGAAAAGCTGAAAATGGCTGCAAAACCT	ENSG00000120149|MSX2|6
ATGCTGCCCTCCAGCTTCAGTCTCCCTTTCCCCATCAGCTCGCCCCTGCAGGCAGCGTCCATATATGGAGCATCCTACCCGTTCCATAGACCTGTGCTTCCCATCCCGCCTGTGGGACTC	ENSG00000120149|MSX2|7
TATGCCACGCCAGTGGGATATGGCATGTACCACCTGTCCTAAGGAAGACCAGATCAATAGACTCCATGATGGATGCTTGTTTCAAAGGGTTTCCTCTCCCTCTCCACGAAGGCAGTACCA	ENSG00000120149|MSX2|8
GCCAGTACTCCTGCTCTGCTAACCCTGCGTGCACCACCCTAAGCGGCTAGGCTGACAGGGCCACACGACATAGCTGAAATTTGTTCTGTAGGCGGAGGCACCAAGCCCTGTTTTCTTGGT	ENSG00000120149|MSX2|9
CCCCCTTTTCCTTTCACAAAGATTGGCTCTGATGGTTTTTATGTATAAATATATATATATAATAAAATATAATACATTTTTATACAGCAGACGTAAAAATTCAAATTATTTTAAAAGGCA	ENSG00000120149|MSX2|10
TTTTTTTCTATATCTCACCTTCCCAAAAGACACTGTGTAAGTCCATTTGTTGTATTTTCTTAAAGAGGGAGACAAATTATTTGCAAAATGTGCTAAAGTCAATGATTTTTACGGGATTAT	ENSG00000120149|MSX2|11
TGACTTCTGCTTATGGAAAACAAAGAAACAGACACAATGCACACAGAAAATATTAGATATGGAGAGATTATTCAAAGTGAAGGGGACACATCATATTTCTGCATTTTACTTGCATTAAAA	ENSG00000120149|MSX2|12
GAAACCTCTTTATATACTACAGTTGTTCCTATCTCTCCCCCGCCCCCCACCGCCCCACCACACACATATTTTTAAAGTTTTTCCTTTTTTAAGAATATTTTTGTAAGACCAATACCTGGG	ENSG00000120149|MSX2|13
ATGAGAAGAATCCTGAGACTGCCTGGAGGTGAGGTAGAAAATTAGAAATACTTCCTAATTCTTCTCAAGGCTGTTGGTAACTTTATTTCAGATAATTGGAGAGTAAAATGTTAAAACCTG	ENSG00000120149|MSX2|14
TTGAGAGGAATTGATGGTTTCTGAGAAATACTAGGTACATTCATCCTCACAGATTGCAAAGGTGATTTGGGTGGGGGTTTAGTAATTTTCTGCTTAAAAAATGAGTATCTTGTAACCATT	ENSG00000120149|MSX2|15
ACCTATATGCTAAATATTCTTGAACAATTAGTAGATCCAGAAAGAAAAAAAAATATGCTTTCTCTGTGTGTGTACCTGTTGTATGTCCTAAACTTATTAGAAAATTTTATATACTTTTTT	ENSG00000120149|MSX2|16
ACATGTTGGGGGGCAGAAGGTAAAGCCATGTTTTGACTTGGTGAAAATGGGATTGTCAAACAGCCCATTAAGTTCCCTGGTATTTCACCTTCCTGTCCATCTGTCCCCTCCCTCCGGTAT	ENSG00000120149|MSX2|17
ACCTTTATCCCTTTGAAAGGGTGCTTGTACAATTTGATATATTTTATTGAAGAGTTATCTCTTATTCTGAATTAAATTAAGCATTTGTTTTATTGCAGTAAAGTTTGTCCAAACTCACAA	ENSG00000120149|MSX2|18
ATGCTGCTGAGCCCCGTCACCTCCACCCCCTTCTCGGTCAAGGACATCCTGCGACTGGAGCGCGAGCGGAGCTGCCCCGCGGCTTCGCCACATCCGCGGGTGCGGAAGAGCCCGGAAAAC	ENSG00000180053|NKX2-6|1
TTTCAGTACCTGAGAATGGACGCAGAGCCGCGAGGGTCAGAGGTTCACAACGCTGGTGGCGGCGGCGGTGACAGAAAGCTGGATGGTTCGGAGCCTCCTGGGGGTCCCTGTGAGGCAGTC	ENSG00000180053|NKX2-6|2
TTGGAGATGGACGCGGAACGGATGGGGGAGCCACAGCCCGGCCTGAACGCGGCCTCGCCCCTCGGCGGCGGGACCAGGGTGCCAGAGCGCGGCGTTGGCAACAGCGGCGACAGCGTGCGG	ENSG00000180053|NKX2-6|3
CAGGTGCTGGCCCTGGAGCGGCGCTTCAAGCAGCAGCGGTACCTGTCAGCGCCCGAGCGCGAGCACCTGGCCAGCGCGCTGCAGCTCACGTCCACGCAGGTCAAGATCTGGTTCCAGAAC	ENSG00000180053|NKX2-6|4
CGACGCTACAAATGCAAGAGACAGCGCCAGGACAAGTCGCTGGAACTGGCTGGCCACCCTCTAACGCCGCGCCGAGTAGCTGTGCCCGTCCTGGTGCGCGATGGCAAGCCCTGCCTGGGC	ENSG00000180053|NKX2-6|5
CCCGGGCCCGGCGCACCTGCCTTCCCCAGCCCCTACAGTGCAGCAGTGTCGCCCTACTCTTGCTACGGAGGCTACAGCGGAGCACCCTACGGCGCAGGCTACGGCACCTGCTACGCGGGC	ENSG00000180053|NKX2-6|6
GCGCCCTCGGGTCCTGCGCCACACACACCACTGGCCAGCGCGGGCTTCGGACACGGTGGCCAGAATGCCACCCCGCAGGGCCATCTGGCAGCCACGCTGCAGGGTGTCAGGGCCTGGTGA	ENSG00000180053|NKX2-6|7
GGAAACATTGCTCTGCGAGTCCTCCCGTTTAAACGCATTCAATTTTTGGGTCTCTCTCTCTCTCTCTCTCTCTCTTCTTCTCTTCTCTCTCTCTCTCTCTCTCCTCTCTCTCTCTCCTCT	ENSG00000175745|NR2F1|1
TTCTCCCCCCTCTCTCCCTCCTCTCCTCTCTCTCTCCTCTCTTCTCTGAACCTCTCTTCTCTTTCTCTTTTCTTACATATTCTACTAGTTGTTTTCCCCTTCTTCTTCTCCTTTCTCTCC	ENSG00000175745|NR2F1|2
TTTTTCTCCCTCCTCCTTGTCTCTTTTACTCCATTCCTGCAGAAGAGAGAGGGCTAAACTTAAAGAAAAAAAAAAGGAGGAGGAGGAGGAGGAGGCACCCCCTTCGTATTCTTCTTATCG	ENSG00000175745|NR2F1|3
TTATTTTATACATATATGATTTTTTTTGGAGGGAGGGTGTTGGTTGCCGGCTGAAGAGCACTTATTTAAAATACTAAAAAAAGAACATTTTTGGGCGATCTCCAGGGTTTTTTTAACTAG	ENSG00000175745|NR2F1|4
CTCTGTGTGTTATAGCAGAAGAAGCAGAAGAAGGAGCAAGAAAGAGGAAAAGAAGAGGATTATTTATTCGACCTACTTTGGATGTCTCTCTCGCTTTTCCTTTTTCCTTTTTTTGGCAAT	ENSG00000175745|NR2F1|5
TATTTTCTTCTGATTTTTATTTTTTCTATTTCGCTGTGATTTCGTCGCCGGCGTGAATTATCCCGTATTTTTCTCCCCCTTCCGTCACCTCCCGAAAGAAGAAGGCAGCGAGAGCCCGGC	ENSG00000175745|NR2F1|6
GCCACCGGCACAACAAAAAGAGCAAAGTGTGTGATCTTCCTCGCCGGCTGCCTCCCGCTCTCCAGCGCTGCCTTCCTGAATGGCTGGCTGCGTCCGGCCCTGGACCTGGCCCCCCGACAC	ENSG00000175745|NR2F1|7
ACACCCGCGCGCCCTGATCGCCGGCGGCAGCCTCGCCCAGCGCCCTGCTCGGCTCACCGCGCTCCCCGCACTCCCGAGCC	ENSG00000175745|NR2F1|8
CCGGCCTCCGCTCGCGCTCCGGCTGCGGCCCCGACTCCTGCTCGGACTCCGGCCCGGGTCCCGGCTCCTCCAGCGGCGCT	ENSG00000175745|NR2F1|9
CAGCTCCAGCGGCGCCTGCAGCCGCGACCTCCTCCTCCTCCGCCGCCGCCGCCGCCTCCGCCCTCGCCGGCTTCCTCTATGTCGGCTCAGCCCGCGCGCTGCGCGTAGCCCGAGCGGCCG	ENSG00000175745|NR2F1|10
TGCGGGCGAGGCGGAGGGCGAGTGTGTGCGCGCGCCGTGGCCCATGCCCGCCGCCCCCGGCGCTGCGCCCCGCGCCGCTCCCGGCTGCCGCCTGTGCCATTTCTGATTTTGCAACTTGGG	ENSG00000175745|NR2F1|11
CCGGCTGCCGCCTGTGCCATTTCTGATTTTGCAACTTGGGGAAGAAGAAAAAAGCGAGAGAAGGGAGCTTGCTCGCCGGGGGGTGGGGAGGGGGGAAGGAGAGCGCGGCCCCCCCAGGAA	ENSG00000175745|NR2F1|12
CGGAGCGCGGGGGGAGCGGGCGAGGGGAGCAGGGGTGTTGGGGGGGGAGCCTGAGAGCCTGGGGGGGCTGCAAAAAGAGAGAAAGAAAACAGCAGGAACCACAACAAAACGCCAGCAGGG	ENSG00000175745|NR2F1|13
GAAAACAGCAGGAACCACAACAAAACGCCAGCAGGGCGGGCGGGCGCGCAGCAGCAGCGGGGCGGCCGAGGCAGTAGCGGCGGCAGCGGCGGCGGCGGCGGAGGCAGCGGCCGGTGTCCG	ENSG00000175745|NR2F1|14
TCCCCCTCCCCCCTTCCCCTTCCCCTTCCCCTCCCAGCGCGCCCGCGCGCCCCGCGGCCCTCGGCGAGCAGCTCGGCTCCCCCCAGCGCTCCCCGGGCCCAAAGATATGGCAATGGTAGT	ENSG00000175745|NR2F1|15
ATATGGCAATGGTAGTTAGCAGCTGGCGAGATCCGCAGGACGACGTGGCCGGGGGCAACCCCGGCGGCCCCAACCCCGCAGCGCAGGCGGCCCGCGGCGGCGGCGGCGGCGCCGGCGAGC	ENSG00000175745|NR2F1|16
CCCGGGCCAGCCCGGAGCGCCCGCCACCCCCGGCACGGCGGGGGACAAGGGCCAGGGCCCGCCCGGTTCGGGCCAGAGCCAGCAGCACATCGAGTGCGTGGTGTGCGGGGACAAGTCGAG	ENSG00000175745|NR2F1|17
AGCAGCACATCGAGTGCGTGGTGTGCGGGGACAAGTCGAGCGGCAAGCACTACGGCCAATTCACCTGCGAGGGCTGCAAAAGTTTCTTCAAGAGGAGCGTCCGCAGGAACTTAACTTACA	ENSG00000175745|NR2F1|18
CATGCCGTGCCAACAGGAACTGTCCCATCGACCAGCACCACCGCAACCAGTGCCAATACTGCCGCCTCAAGAAGTGCCTCAAAGTGGGCATGAGGCGGGAAGCGGTTCAGCGAGGAAGAA	ENSG00000175745|NR2F1|19
TGCCTCCAACCCAGCCCAATCCAGGCCAGTACGCACTCACCAACGGGGACCCCCTCAACGGCCACTGCTACCTGTCCGGCTACATCTCGCTGCTGCTGCGCGCCGAGCCCTACCCCACGT	ENSG00000175745|NR2F1|20
CGCGCTACGGCAGCCAGTGCATGCAGCCCAACAACATTATGGGCATCGAGAACATCTGCGAGCTGGCCGCGCGCCTGCTCTTCAGCGCCGTCGAGTGGGCCCGCAACATCCCCTTCTTCC	ENSG00000175745|NR2F1|21
CGGATCTGCAGATCACCGACCAGGTGTCCCTGCTACGCCTCACCTGGAGCGAGCTGTTCGTGCTCAACGCGGCCCAGTGCTCTATGCCGCTGCACGTGGCGCCGTTGCTGGCCGCCGCCG	ENSG00000175745|NR2F1|22
GCCTGCATGCCTCGCCCATGTCTGCCGACCGCGTCGTGGCCTTCATGGACCACATCCGCATCTTCCAGGAGCAGGTGGAGAAGCTCAAGGCGCTACACGTCGACTCAGCCGAGTACAGCT	ENSG00000175745|NR2F1|23
GCCTCAAAGCCATCGTGCTGTTCACGTCAGACGCCTGTGGCCTGTCGGATGCGGCCCACATCGAGAGCCTGCAGGAGAAGTCGCAGTGCGCACTGGAGGAGTACGTGAGGAGCCAGTACC	ENSG00000175745|NR2F1|24
CCAACCAGCCCAGCCGTTTTGGCAAACTGCTGCTGCGACTGCCCTCGCTGCGCACCGTGTCCTCCTCCGTCATCGAGCAGCTCTTCTTCGTCCGTTTGGTAGGTAAAACCCCCATCGAAA	ENSG00000175745|NR2F1|25
CTCTCATCCGCGATATGTTACTGTCTGGGAGCAGCTTCAACTGGCCTTACATGTCCATCCAGTGCTCCTAGACCTTGGGCGCTTCCCACCTGCCCCGTCCCCCTAGAGACTCAGAGGACC	ENSG00000175745|NR2F1|26
CACCTGGGCCAAGGACTCCAAAGCCGCGGGGACACCGGGAAGTGCAGCGGGCCAGGCAGGCTGGGTGGGAGGGAGGAGGGCCGAGACAGGAGCAGCCCACCCAGCAGAAATACAATCCGA	ENSG00000175745|NR2F1|27
GCTACAAAGCATGGGAAAAAGAGACTCTTTTAGGATCAGATCTGTGAGCACGTTGGCGAGGAAAAACAAAACAAACAAAAAAAAGAACCTTGTGTCTGTCTGGTGAAAAAAAGAAAAACA	ENSG00000175745|NR2F1|28
AATTGGAAGAGAGGACCATGAGAATTTTAATAAAACAGAAGGAAACTAATGGACCTTCCAGGATTTATTGTGGACGGATGTGGATATATTCTGTACAGGAACAACACATATGGAAGTGGA	ENSG00000175745|NR2F1|29
CTGAAGCCTATGTAGAAACACACACACACTGAACATTGTTATTCATTTTGTAAAATACTAGTCTTTATTTTCATTTTTTGTAAAATTTAAACATCGTATGCGCATAAAGAAAAAGGAAAC	ENSG00000175745|NR2F1|30
AAGAATTAGGGGAAAATAACATTTTCCAAATAATTATAAAAAATTGTCCTGTGTCTATGTATCTATATCTGTTTTGTATTTTTTTCTGGTTCCAAACCAGATTTCCTGTGATTCTATACT	ENSG00000175745|NR2F1|31
AATAATTTTTGATATAACCCTTTGCTTCTTATAATGAGTGCGATATATGTTGTCGAGGCTGTTCTTCAAGAATTAAAATTGAAGTGAAAATTTAAACAAAAATAAAAGAATTTAGCAAAA	ENSG00000175745|NR2F1|32
AAAACGCTGCTTGCTTGCAAATGAGGAGGCCGCTAGGCATTTGCCTAGAACCACAACCTTTCTCCGGTTTCGCCTTTTTTTAACCCTGATTTTTTTTTTCCATTCTGGAGGGCGGTTCAG	ENSG00000175745|NR2F1|33
CCAACTGGCTGGCTGGAGTAATTAGACATCTGAGAGGAACCTAGTCTGTATCTGAGGTCAAAGGGGACTTGCCTCAGAAGTTCTTGAATTATCACTAGTTTTATTTGTATTTTTGCTCGA	ENSG00000175745|NR2F1|34
ATTCAGATGGTTAATGAATCCAGTGTTTTTGCAGTTGAAAGCTCGTGCATTCACTGGGCAAAAGCTGGCTGCAGGTTGCAGTGGCACCGCGCAGGACAGACATTAATTATATTTCCTACT	ENSG00000175745|NR2F1|35
GGAGCCGCAGATCTGGTCCGTCGCTCGCCTGGGTGCCTGGAGCTGAGCTGCGGCAAGGCCCGGCTCCTGTTCGACCGCCCGAGGGGTGTGCGTGTGCGCGTTGCGGAGGGTGCGCTCAGA	ENSG00000164093|PITX2|1
GGGCCGCGTCGTGGCTGCAGCGGCTGCTGCCGCCGCAGGGGATCTAATATCACCTACCTGTCCCTGTCACTCTTGACACTTCTCTGTCAGGGCTGCCGCGTGGGGGGGGGGCGGGCAGAG	ENSG00000164093|PITX2|2
CGCGGTCGGCGTTAGCTTTCCTTATTGGAGGGGTTCTTGGGGGAGGGAGGGAGAGAAGAAGGGGGTCTTTGCCCACTCTTGTTTCGCTTTGGAGCTTGGAAGCCTGCTCCCTAAAGACGC	ENSG00000164093|PITX2|3
TCTGAGTGGTGCCCTTCTGCCCACATCCCATGTCTTCGTTTGCCCGCTGACTTTCCGTCTCCGGACTTTTTCGCTTGAGCCTTCCGGAGGAGACGGGGGCAGCTTGGCTTGAGAACTCGG	ENSG00000164093|PITX2|4
CGGGGGTTGCGTCCCCTGGCTCTCCCCGCAGCGGGGAAACTCCGCGCCTAGAGCGCGACCCGGAGCGGGCAGCGGCGGCTACGGGGGCTCGGCGGGGCAGTAGCCAAGGACTAGTAGAGC	ENSG00000164093|PITX2|5
GTCGCGCTCCCTCGTCCATGAACTGCATGAAAGGCCCGCTTCACTTGGAGCACCGAGCAGCGGGGACCAAGCTGTCGGCCGTCTCCTCATCTTCCTGTCACCATCCCCAGCCGTTAGCCA	ENSG00000164093|PITX2|6
TGGCTTCGGTTCTGGCTCCCGGTCAGCCCCGGTCGCTGGACTCCTCCAAGCACAGGCTGGAGGTGCACACCATCTCCGACACCTCCAGCCCGGAGGCCGCAGAGAAAGATAAAAGCCAGC	ENSG00000164093|PITX2|7
AGGGGAAGAATGAGGACGTGGGCGCCGAGGACCCGTCTAAGAAGAAGCGGCAAAGGCGGCAGCGGACTCACTTTACCAGCCAGCAGCTCCAGGAGCTGGAGGCCACTTTCCAGAGGAACC	ENSG00000164093|PITX2|8
GCTACCCGGACATGTCCACACGCGAAGAAATCGCTGTGTGGACCAACCTTACGGAAGCCCGAGTCCGGGTTTGGTTCAAGAATCGTCGGGCCAAATGGAGAAAGAGGGAGCGCAACCAGC	ENSG00000164093|PITX2|9
AAGAATGGCTTCGGGCCGCAGTTCAATGGGCTCATGCAGCCCTACGACGACATGTACCCAGGCTATTCCTACAACAACTGGGCCGCCAAGGGCCTTACATCCGCCTCCCTATCCACCAAG	ENSG00000164093|PITX2|10
AGCTTCCCCTTCTTCAACTCTATGAACGTCAACCCCCTGTCATCACAGAGCATGTTTTCCCCACCCAACTCTATCTCGTCCATGAGCATGTCGTCCAGCATGGTGCCCTCAGCAGTGACA	ENSG00000164093|PITX2|11
GGCGTCCCGGGCTCCAGTCTCAACAGCCTGAATAACTTGAACAACCTGAGTAGCCCGTCGCTGAATTCCGCGGTGCCGACGCCTGCCTGTCCTTACGCGCCGCCGACTCCTCCGTATGTT	ENSG00000164093|PITX2|12
TATAGGGACACGTGTAACTCGAGCCTGGCCAGCCTGAGACTGAAAGCAAAGCAGCACTCCAGCTTCGGCTACGCCAGCGTGCAGAACCCGGCCTCCAACCTGAGTGCTTGCCAGTATGCA	ENSG00000164093|PITX2|13
GTGGACCGGCCCGTGTGAGCCGCACCCACAGCGCCGGGATCCTAGGACCTTGCCGGATGGGGCAACTCCGCCCTTGAAAGACTGGGAATTATGCTAGAAGGTCGTGGGCACTAAAGAAAG	ENSG00000164093|PITX2|14
GGAGAGAAAGAGAAGCTATATAGAGAAAAGGAAACCACTGAATCAAAGAGAGAGCTCCTTTGATTTCAAAGGGATGTCCTCAGTGTCTGACATCTTTCACTACAAGTATTTCTAACAGTT	ENSG00000164093|PITX2|15
GCAAGGACACATACACAAACAAATGTTTGACTGGATATGACATTTTAACATTACTATAAGCTTGTTATTTTTTAAGTTTAGCATTGTTAACATTTAAATGACTGAAAGGATGTATATATA	ENSG00000164093|PITX2|16
TCGAAATGTCAAATTAATTTTATAAAAGCAGTTGTTAGTAATATCACAACAGTGTTTTTAAAGGTTAGGCTTTAAAATAAAGCATGTTATACAGAAGCGATTAGGATTTTTCGCTTGCGA	ENSG00000164093|PITX2|17
GCAAGGGAGTGTATATACTAAATGCCACACTGTATGTTTCTAACATATTATTATTATTATAAAAAATGTGTGAATATCAGTTTTAGAATAGTTTCTCTGGTGGATGCAATGATGTTTCTG	ENSG00000164093|PITX2|18
AAACTGCTATGTACAACCTACCCTGTGTATAACATTTCGTACAATATTATTGTTTTACTTTTCAGCAAATATGAAACAAATGTGTTTTATTTCATGGGAGTAAAATATACTGCATACAAA	ENSG00000164093|PITX2|19
TCAGAGGGATCAATATACAGGCCCTACCACGGAAAGGCGGGGAAAAGGTTCGAATAGAAAACTGCTGCAGAAGGGAAGCCACTGAGAGGAGCAAATGTGGACTTGAGGGAAACTCTCTCC	ENSG00000164093|PITX2|20
CCCACCCCCACTTCTATCCCGTGCAATTTAATACCATCCTCGCCAGGAACCTTAACCTCGTCATTTTAAAAAATGAGATATCCGTGACCCAGGGTGAACTTGTTGAATGTAGGTACAGCA	ENSG00000164093|PITX2|21
GAGGAAATTCTAGACTCTATGAGCGTCTGAGCCTTGTCCAGTGCAAACCCTTCGTGAACACTGGGTCAGTGCGTGGCCGTGCCCACCTGTGCGCCGACACTCTCAGCATGCCTGGTCCAC	ENSG00000164093|PITX2|22
CCGCCTTGACCTCGGGCGCGGTGTCCCAGCTAAGCTGGGCCCAGCGTCCCGGCCTTCCCCAGCTGACAAGCCTAGCTCGTTCGCTCCCGGCTGTGGCCCTCCCACCCTCTCCCACTAGCT	ENSG00000164093|PITX2|23
CACTCCATTCTTCTAGATTTCTCTTCACTCATCCTCTCCCATCCCCACCGCGCCCACCTCCACTCCCGCCCTCTACCGGTCTCTCACTTTCCTCCCTCCGCAGTCCCTCTTTGCTGTGAC	ENSG00000164093|PITX2|24
CTCTTTCCTCAACTCTGCAGGCCTGAAAGAAGGTCACACACGCACGCTCACACCCACACTCCACACGCCTCGTCCCAAACAACCCCATGAACATTGTCCTTTGTTCCGTCTCTTGGGCCA	ENSG00000164093|PITX2|25
CTTTCCCTGTCGCTTCCTCCCAGCCCGTCCTGATTTGCTCCCCAAAAGTACGTTTCTGTCTCCCCGCTGCCCTGGCGCTCCCCCTTTGATTTATTAGGGCTGCCGGGTTGGCGCAGATTG	ENSG00000164093|PITX2|26
CTTTTTCTTCTCTTCCATCCCATCCTCCCTTCTGGTCCTCCTTTCCACAGTGGGAGTCCGTGCTCCTGCTCCTCGGTTGGCTCCTAAGTGCCCCGCCAGGTCCCCTCTCCTTTCGCTCTC	ENSG00000164093|PITX2|27
CCGGCTCCGGCTCCCGACTCTTCGGCCCGCTGGCATCTGCTTCCCTCCCCTGCCTCGTTTCTCGTCGCCCCTGCTCGCTCCCCCCGGCGCTCGCCCGGGCGCTGTGCTCGCTCCTGGATC	ENSG00000164093|PITX2|28
GCCAGCCGCGCAGCCGGGCTCGGCCGGCCGCCCGCGCGCCACTGTGCAGTGGAGTTTGGTGGAATCTCTGCTGACGTCACGTCACTCCCCACACGGAGTAGGAGCAGAGGGAAGAGAGAG	ENSG00000164093|PITX2|29
GGATGAGAGGGAGGGAGAGGAGAGAGAGTGCGAGACCGAGCGAGAAAGCTGGAGAGGAGCAGAAAGAAACTGCCAGTGGCGGCTAGATTTCGGAGGCCCCAGTGCACCCGTGGACTCCTT	ENSG00000164093|PITX2|30
CGGAACTTGGCACCCTCAGGAGCCCTGCAGTCCTCTCAGGCCCGGCTTTCGGGCGCTTGCCGTGCAGCCGGAGGCTCGGCTCGCTGGAAATCGCCCCGGGAAGCAGTGGGACGCGGAGAC	ENSG00000164093|PITX2|31
AGCAGCTCTCTCCCGGTAGCCGAATCACTAAATCTGGAGCCGCCAAACTGCTACTTCTGGGCCCACGGGCCCACAAGGATCGAATCGGCAGAGTCCCCGCCCGCGTTCTCGCTAGCGGGT	ENSG00000164093|PITX2|32
CGAGACGCAGGGAAACGATAACGGGGAATGGAGACCAACTGCCGCAAACTGGTGTCGGCGTGTGTGCAATTAGGCGTGCAGCCGGCGGCCGTTGAATGTCTCTTCTCCAAAGACTCCGAA	ENSG00000164093|PITX2|33
TGGCCCAGCTTTTTCCCTCCTGGGCTCGCGCTTCTTACACCTTCTTTACGGTTGTTTCGGCCATTCAGGTCTCTCCCACACACCCTATTTCCTAGTTTTGTGATCTCCGGGAGCAAAGTT	ENSG00000164093|PITX2|34
TTAATACACAACTACTAGTCCTCTTAGAAGGAGAAAGAAAAAAAGAAGAAAGACTTTTCTGCTTGGTTTATTTATCTTCTCTCAGGAGTTGAACTCTGGAAATTGAAACTCACACCCCCT	ENSG00000164093|PITX2|35
CTTCTAAATTATAATCATAGTTTTGTAAAAAGGGCTTACCTTAACTTTGTAGCAAATCTGTACTTTATGGATTGGCAAAAATGAGCTCAAATAAATAACCCAATAGCAACGTCCTGGTTT	ENSG00000164093|PITX2|36
AAAATTAAGTGCTCTGGGTAGAAAAAATAAAGCCCCCGGTTAGAGCAGAGCAAACAAAAAGAAGAAAACAACGATAAAAAGAATAAAGACCAAAATGCTCTCCCAAATCAGAGGGAATGA	ENSG00000164093|PITX2|37
AGACACTCTCTGGGTGGCATTTGTGCAAGGCATGAGGCTATGCTGGTGGATAAAAGGCCGGGAAGAAGTTGAAAATGGTTTTAGTTTAACTGTCCAGAGCCAGAGCTGGGTCCTGGGCGG	ENSG00000164093|PITX2|38
GAGGTACAGGCCAAGTAGACCAGGAGAGAATGTGGAAGGCAGCGCCGCCTGGGAGGGCGCCGGTGGGGCGCAGCTTTGCAAAGGCAGAAGGCCTCGCGGCGGCCTGGTTGCGAGATTACA	ENSG00000164093|PITX2|39
GTTCCCTCTCCGAGGCCGACAGGACTGCCGCCCTGGCTCAGGCTCCCAGAGCGGCACCGGCTCACTGCCCCGCCATCCCGCGATCTCACGAGCTGGGCTGCATGGGCAATCCCCTGCACA	ENSG00000164093|PITX2|40
GGACATTGTGTTCCTGGCTTGCAGTTGCCAGAGCAGAGCTAATAAAATCCCTACCAGGCCAAGAGCCGCGAACAGGCTCCAACCTGTGAGCCTTTAACAAGGAAAACCCGCCAGAGACAC	ENSG00000164093|PITX2|41
GCGAGGGGGAGGGGGGTCTGTAAACCACGCGCGTGTGCGCGTCCCAGGAGATTTGGTGTGTCTGCGCAGAGGTGTATAAATATACTTGAAAGCACAGGCTATAAAAGTGAATGTGCCGCT	ENSG00000164093|PITX2|42
CAGGAAGCCCGCCTCTGGTTTTAAGATGTTAGGCCAACAGGGAAGCGCGGAGCCGCAGATCTGGTCCGTCGCTCGCCTGGGTGCCTGGAGCTGAGCTGCGGCAAGGCCCGGCTCCTGTTC	ENSG00000164093|PITX2|43
GCGGTGCAGTGAAGCGAGGCCAGGGTGTGTGAGTGCGCTAGCGTGTGTGTCGGGGGAAGGCGGGGGTTGGCCTCCGATGGAAGTTTTAGTAATCTGCACTGTGGCATCTGTTTGCTCCCT	ENSG00000164093|PITX2|44
ATAAACTGGGTGACAGAGTCAGAAAACTCCCCAGCTAAACACCCGTAAGACTTCATACAACACAATACTCTATACTGTGATGATCACAGCTGCCAAGGCTACCTAAAAGAAGACAGTTAT	ENSG00000198523|PLN|1
CTCATATTTGGCTGCCAGCTTTTTATCTTTCTCTCGACCACTTAAAACTTCAGACTTCCTGTCCTGCTGGTATCATGGAGAAAGTCCAATACCTCACTCGCTCAGCTATAAGAAGAGCCT	ENSG00000198523|PLN|2
CAACCATTGAAATGCCTCAACAAGCACGTCAAAAGCTACAGAATCTATTTATCAATTTCTGTCTCATCTTAATATGTCTCTTGCTGATCTGTATCATCGTGATGCTTCTCTGAAGTTCTG	ENSG00000198523|PLN|3
CTACAACCTCTAGATCTGCAGCTTGCCACATCAGCTTAAAATCTGTCATCCCATGCAGACAGGAAAACAATATTGTATAACAGACCACTTCCTGAGTAGAAGAGTTTCTTTGTGAAAAGG	ENSG00000198523|PLN|4
TCAAGATTAAGACTAAAACTTATTGTTACCATATGTATTCATCTGTTGGATCTTGTAAACATGAAAAGGGCTTTATTTTCAAAAATTAACTTCAAAATAAGTGTATAAAATGCAACTGTT	ENSG00000198523|PLN|5
GATTTCCTCAACATGGCTCACAAATTTCTATCCCAAATCTTTTCTGAAGATGAAGAGTTTAGTTTTAAAACTGCACTGCCAACAAGTTCACTTCATATATAAAGCATTATTTTTACTCTT	ENSG00000198523|PLN|6
TTGAGGTGAATATAATTTATATTACAATGTAAAAGCTTCTTTAATACTAAGTATTTTTCAGGTCTTCACCAAGTATCAAAGTAATAACACAAATGAAGTGTCATTATTCAAAATAGTCCA	ENSG00000198523|PLN|7
CTGACTCCTCACATCTGTTATCTTATTATAAAGAACTATTTGTAGTAACTATCAGAATCTACATTCTAAAACAGAAATTGTATTTTTTCTATGCCACATTAACATCTTTTAAAGTTGATG	ENSG00000198523|PLN|8
AGAATCAAGTATGGAAAAGTAAGGCCATACTCTTACATAATAAAATTCCTTTTAAGTAATTTTTTCAAAGAATCACAGAATTCTAGTACATGTAGGTAAATCATAAATCTGTTCTAAGAC	ENSG00000198523|PLN|9
ATATGATCAACAGATGAGAACTGGTGGTTAATATGTGACAGTGAGATTAGTCATATCACTAATATACTAACAACAGAATCTAATCTTCATTTAAGGCACTGTAGTGAATTATCTGAGCTA	ENSG00000198523|PLN|10
GAGTTACCTAGCTTACCATACTATATCTTTGGAATCATGAAACCTTAAGACTTCAGAATGATTTTGCAGGTTGTCTTCCATTCCAGCCTAACATCCAATGCAGGCAAGGAAAATAAAAGA	ENSG00000198523|PLN|11
TTTCCAGTGACAGAAAAATATATTATCTCAAGTATTTTTTAAAAATATATGAATTCTCTCTCCAAATATTAACTAATTATTAGATTATATTTTGAAATGAACTTGTTGGCCCATCTATTA	ENSG00000198523|PLN|12
ACTGATAACATAAACAGTAAATTAACACATATTTTGCGTGTTATATGTATTATACACTATATTCCTACAATAAAGTAAGCTAGAGAAAATGTTATTTAGAAAATCATAAGAAAGAGAAAA	ENSG00000198523|PLN|13
CTATTCATTAAATGGAAGTGGGTCAACATAAAAGTCTTCATTCTCATTGTCTTCACATTGAGTAGGCAGAGGAGGAGAAAGATGGGGAGGAAGAGAAGGCGTTGGTCTTGCAGTCTTGTC	ENSG00000198523|PLN|14
TTAGGGGTGTGGGGAGTGGGGGAAAGAATATTCATGTATAAGTGGACCCTTGCAATTCAAGCCCTTGTTGTTCAAGGGTCAACTGTAATAGGATATAGCTATTTTTCTTCCTCTATCAAC	ENSG00000198523|PLN|15
CAAATGGTAAGCATCTATTTTGCAGTCCACTCTACTGAGCTAAATTATAGATCCAGCTATGCTATTTATAATTATTTTCTTGATGAATAAATTTTCAATTTCTCCTCTGACCATTTCAGA	ENSG00000198523|PLN|16
ACATCTTCCAATAACTCATAAAACAACTGAAGTAAAATTGAGTGCTGGAAAATATATTCACCAAACTTTGGTAATTTAAGTTGACTAAAGTTTAAAATTAAGTCTAAAATAGTTTACACC	ENSG00000198523|PLN|17
TATACTGCATAATCCAACAATTTTAATTTCAGTTGAAGACATGTTACTAATATAACTATTATTAAAAGAGTAGAGGATGTGTAATTAACCATATCTTCTAAAACATGGTTACTAAAAGAA	ENSG00000198523|PLN|18
TATGTAACATCAATATTGACCTTGGTTTCTTACACAAGTGTTGCTAACTCAATAGTGAAGGAGACACTATTAAATTTTCTGAACCCATGAGAGATACTAGAGATGGGGAGTGGAAAGTGT	ENSG00000198523|PLN|19
TTGGTTCAGGGATATCTGAAGAACAGAAGGGCAGAGATTTCTTAAGTGACGCCTCATCTACAAGCTGGAAATTCCTAAAAACAAGTAGAAAGCTTATAAACAACAGGTGATACACTCACC	ENSG00000198523|PLN|20
TCACTGGTTTTAGTAAATTACCAATACAGAAAGTATCCCTAGTCTTAAAAACAAGTGGAAAATTTGAACTGATTAGTCATATTCCTTTGATTACACTGTTTGTTACAATATTTTTCTCAG	ENSG00000198523|PLN|21
TTTCTCAGTAAACAGAAATAACTAATTTTTTTGTTCTTCATTCTTTGATAGAAATTAAAATCTTATTCTGTGAGGATTACAGAATACTATAACTCAAATTATAAAGTAGAATAAACTCTT	ENSG00000198523|PLN|22
GAAAACAATTTATTTTTAAAATTTAATATACTAAATGCTCAAATATGTTCTACTATAGAATAAGTTCTTATCTTAATTTACAGGGCACTAAAAACAATTTTAAAATGCTTAATGTTGCCT	ENSG00000198523|PLN|23
GCACTAAAAACAATTTTAAAATGCTTAATGTTGCCTTTTATATTTTAATTGGTTAAGAATATATATTTGTTTAATGCAAATCAGAATCACTATATTAAAATGAATGTTCTTGAAAACTCA	ENSG00000198523|PLN|24
CGCGGCACGCGCGGGTCTGGGCGCCGGCCCCAGCCAACGGCGGGTGGGAGCAGCGCGGGAACGTGGCGGCGCGGCGGGTTGTGCCGGAGGTCACGGCCTCCCCACATCCTTTGGCTGAAG	ENSG00000157927|RADIL|1
GGTCACGGCCTCCCCACATCCTTTGGCTGAAGCCCACAGTCCTCATCCATGAAGCCTCACCCACCATGTTTTATGGGACGCACTTCATCATGTCCCCGCCCACCAAGAGCAAACTGAAGC	ENSG00000157927|RADIL|2
GGCAGAGCCAGCTGTTGTCCAGCATGCTGTCCCGGACGCTGAGCTACAAGTACCGGGACCTGGACTCCACCTTCTCCAGCCTGGGCGCCAGCGATGACCCCGCCGAGCTCTCCACCCAGC	ENSG00000157927|RADIL|3
TGTCGGCCCCTGGTGTCCTGAAGGTGTTTGGGGACAGTGTCTGCACAGGAACCCACTACAAGAGCGTCCTGGCCACCGGCACCTCCAGCGCCCGTGAGCTGGTGAAGGAGGCGCTGGAGC	ENSG00000157927|RADIL|4
GGTACGCCCTGGACCCCAGGCAGGCCGGCCAGTACGTGCTGTGTGACGTGGTGGGCCAAGCCGGCGATGCTGGGCAGCGGTGGCAGGCCCGGTGCTTTCGGGTGTTTGGGGACAGTGAGA	ENSG00000157927|RADIL|5
AGCCCCTCTTGATCCAGGAATTATGGAAACCCCGAGAAGGTTTATCCCGGAGGTTTGAGCTGAGGAAGAGGTCGGACGTGGAGGAGCTGGCAGCCAAGGAGGTGGACACCATCACGGCAG	ENSG00000157927|RADIL|6
GGATAAACGCCCAGGCCCGGAGGCTGCAGCGGAGTCGCGCGAAGGGAACCCCGACCCCGGCCCTGGGGGATGCCCGGAGCTCTCCTCCACCCCGGTTGCGCCGCACAGTCAGTGAGACCA	ENSG00000157927|RADIL|7
GCCTGAGCCCAGTGAACGCCCTGCCCGCTGCCGCCCAGGGCCCCGAGGAGCCCGGCCCCGACGCCATGCGGTACTCGCTGTACCAGTCCCCGCATCTGCTCCTTCTGCAGGGCTACAGCC	ENSG00000157927|RADIL|8
AGCAGCACGACAGCCTGGTGTATGTGCTCAACCGGGACCGGCACACGGTGGGCCAGCGGACCCCCTCCAGCAAGCCCAGCATCAGCCTCTCAGCCCCCGACATCCTGCCTCTACACTGCA	ENSG00000157927|RADIL|9
CCATCCGCCGGCAACCGCTCCCGGACAGCGGCCAGGCCGCGGGGAGGCTGGTCCTGGAGCCCATCCCCGGGGCGCACATCTCCGTCAACTTCTCCGAGGTGGGGCACAGGACCGTGGTGC	ENSG00000157927|RADIL|10
TGCACCACGGGGACCTGCTCTCCCTGGGGCTCTACTACCTGCTGCTATTCAAGGACCCCGCGCAGGCCCAGCCCCTGCCCGCCCGGGCCTTGGCGCGCCTCCGGGCTGTGCCGCAGAGCT	ENSG00000157927|RADIL|11
GCCGGCTGTGCGGGGCCGCGCTCGGGGCCCGGGGAGCCGCCTCCCCTACTCAGGCCGCCCTGCCCCGGCGCCAGCAGCTGCTCCTGGAGTTTGAGCCCCACCTGGAGGACACGCTGCTGC	ENSG00000157927|RADIL|12
AGAGGATCATGACGTTGATCGAGCCGGGGGGCGACGACCACAAGCTGACCCCCGCCTTCCTCCTGTGCCTCTGCATCCAGCACTCGGCCACCCACTTCCAGCCGGGCACATTCGGGCAGC	ENSG00000157927|RADIL|13
TCCTGCTCAAGATAGCCAGGCTGATCCGCGAGACTGTCTGGGAGAAAACCAAAGAACTAGCAGAGAAGCAGGCGCAACTCCAGGAGCCCATCTCGCTGGCCAGCTGCGCCATGGCTGATC	ENSG00000157927|RADIL|14
TGGTTCCAGACTTGCAGCCCATTCTTTTCTGGATGTCTAACTCCATCGAGCTCCTGTACTTTATCCAGCAGAAATGCCCACTCTACATGCAGAGCATGGAGGAGCAGCTGGACATCACAG	ENSG00000157927|RADIL|15
GCTCGAAGGAATCGCTGTTCTCCTGCACGCTGACGGCCAGCGAGGAGGCCATGGCGGTGCTGGAGGAGGTGGTGCTGTACGCCTTCCAGCAGTGCGTCTACTATGTCTCCAAGTCCCTGT	ENSG00000157927|RADIL|16
ACATCTGCCTCCCGGCACTCCTGGAGTGCCCGCCATTCCAGACGGAGCGCCGTGAGAGCTGGTCCTCGGCCCCCGAACTGCCCGAGGAGCTGCGCCGCGTGGTGTCTGTGTACCAGGCAG	ENSG00000157927|RADIL|17
CCCTGGACCTCCTGCGGCAGCTGCAGGTGCACCCCGAGGTGGCCTCGCAGATGCTCGCCTACCTCTTCTTCTTCTCCGGGACACTGCTTCTCAACCAGCTCCTCGACAGGGGCCCCTCCC	ENSG00000157927|RADIL|18
TGAGCTGCTTCCACTGGCCCAGAGGTGTCCAGGCCTGCGCCCGCCTGCAGCAGCTCCTGGAGTGGATGCGGAGCGCCGGCTTCGGGGCGGCTGGAGAGCACTTCTTCCAGAAGCTCTCCT	ENSG00000157927|RADIL|19
GCACCCTCAACCTGCTGGCCACACCCAGGGCCCAGCTCATCCAGATGAGCTGGACAGCCCTGCGGGCTGCGTTCCCCGCACTGAGCCCAGCACAGCTGCACCGGCTGCTGACTCACTACC	ENSG00000157927|RADIL|20
AGCTGGCCTCGGCCATGGGCCCCATGAGCACCTGGGAGCCAGGGGCCCAGGACAGCCCCGAGGCCTTCAGGTCAGAGGATGTTCTGGAGTCCTACGAAAACCCCCCACCCATCGTCCTGC	ENSG00000157927|RADIL|21
CCAGCGACGGCTTCCAGGTGGACTTGGAAGCCAACTGCCTGGACGACAGCATCTACCAGCACCTGCTCTACGTCCGCCACTTTCTGTGGGGTCTGCGGAGCAGAGCCAGCCCCGGCAGCC	ENSG00000157927|RADIL|22
CTGGCAGGCCTGGCAGTGGGGCCTCCCAGCCAGTGTGCCCCGAGGGTATGCACCACGTGGTCCTTGACGGGCACCTGGAGGCCCCGAGCTGCCCCCTGGCTCCCAGGGACCCTGGCCCAG	ENSG00000157927|RADIL|23
AGGCTGGCCCCCCGCACACGGACTCGTCCTGCTTGCTCACGCCTCCCAGCACTCCACTTGGCCCTGAGCCTGGGGACCCCGACTGGCCAGAGTCCGGCGGCCCCTGTGGAAAAGCGCTCC	ENSG00000157927|RADIL|24
CAGAGAGGCAGAGGAACGGACTCAGCGGCCTCCGGGGTGCAGCTCCGGAAGGAGACTCTGCAGCCCTTGCGGAGGAGTCCCCTCCAGCCCCGTCCAGCCGCAGCTCCAGCACCGAGGACT	ENSG00000157927|RADIL|25
TCTGCTACGTCTTCACGGTGGAGCTGGAACGAGGCCCCTCCGGGCTGGGGATGGGCCTGATCGACGGGATGCACACGCACCTGGGCGCCCCCGGGCTCTACATCCAGACCCTGCTCCCGG	ENSG00000157927|RADIL|26
GCAGCCCCGCAGCGGCCGACGGGCGCCTGTCGCTGGGGGACCGTATCCTGGAGGTGAATGGCAGCAGCCTCCTGGGCCTTGGCTACCTGAGAGCTGTGGACCTGATCCGTCATGGCGGGA	ENSG00000157927|RADIL|27
AGAAGATGCGGTTCCTGGTCGCGAAGTCCGACGTGGAAACAGCCAAGAAGATCCATTTCCGCACGCCCCCTCTCTAGGGGGGCTGCGAGGACACCCCCACAGGCCCGGCACCCGGTCCCA	ENSG00000157927|RADIL|28
CCTGGTGACACTGGGCTTCCTCCCGCCTTCGTCCCTGTTTTGTAACTGACCAAGTTGGGTCCCGGGTGGGGAGCCTCACCCTGGGGACATGCCTGTTGATAACATGCATCTCAGTGTAGG	ENSG00000157927|RADIL|29
TTCTATTTATATGGCAGATGACGTGAAATTGTGATGTTTGTTACAGAGCTTTTATGTTTAAAGACTTCAATGGAGAAGTACGGTTCAATAAACTATTTTTCCCGTTCTTAGAGGGTGCCC	ENSG00000157927|RADIL|30
TGCTGGGGTCTCAACTCGGGCAGCAGGCGTGGGCTGCTCGGAGGGGCCGCAGGGGCTCCCCATGGCCTCTGCCTGCCACCGGCACGGGAGAATGCAGTGACAGCTGTCATCAGGGGATCA	ENSG00000157927|RADIL|31
TCTGAACTGACTCTCCCTGCCCCCGTCCCACCCAGACACAGGGCACTGCAGGAAGCAGCTCCAACAGCCCCTCCCAGCTGAAGCAGGGCCAGACCTGGCAGAGGATGCTGGACTTCTGAT	ENSG00000157927|RADIL|32
CCCGCTGCTCAGCACAGGCCCCAGAGAAAGGTCTAGACACCCAGGCGTTGGAAAGTGGACCGGCCTGATGGTCTCTGAGGCGCCGAGCCCACCCTGGGCCCTGCTTCCTCTCCCAGGACT	ENSG00000157927|RADIL|33
CCTGCTCCCTCCTGAGTTCCTCTCCCCTACTAAAGCCACCAGCGTGGCCCTGATACCAGGCTGGCGGCCCCAGGCCCTTAATCCTCACCAGCGTCCCCCTGGCCACCGGCCCTAACCCGG	ENSG00000157927|RADIL|34
GCAGGAGGCCAGCGTCCCTCTCCACCAGCTGGCTGACCATGCGCAGGACCAGGGCAGGGCACTTGCTGCCTCGGGGTGACAGCGTGGGTCGCTGGGCATCCTCAGCAGCTCCACCAACTG	ENSG00000157927|RADIL|35
GGTGTGGGTGGCTTCCGCGCCCTCCTGGCTGTGGTGGAACTGGTGGCCCAGGGTCATCTTTGATAGCAACAGAGAAACCCTGGGGAAGAGGGTCCCGGCATCAGTTGCAGATGCACCTCT	ENSG00000157927|RADIL|36
CACTGGGACAGAGGTCTGTGCGGGGTCCCCAGATCGGTGTCCTGGGTCTGTCCCAGGCCCTGGGCCTCGTGCAGCTCCACGCTGCCCCCTGGTGTGCGCTACGGCGAGGTGCAGCGCGTC	ENSG00000157927|RADIL|37
CGCCCCGCGCCCTCTGCCGACCCGCAGTTCTGTGTGCGGCTCCGCATTGCGCCTGGCTCGAAACGGCGACCACTGCCAGGTTCCCAAAATACTGGATAAAATATATATATATATATAGTG	ENSG00000157927|RADIL|38
ACGTAATATATTCGTATATTTTATAAACATTTTTTATATTTTATTATATAAAATATAAATATTTAATTTTTTTTTATGAGACGGAGTCTCGCTCTGTGACCCAGGCTGGAGTGCAGTGGT	ENSG00000157927|RADIL|39
CCCAAAGTGCTGGGATTACAGGCGTGGGATTACCATGCCTGGCCTTGTTCTGTTTCTTTTCCTAGGAGTCCCACAACGTGTGTGTTAGCACTGCCGAGAATGTCTCACAGCTCTGGACGG	ENSG00000157927|RADIL|40
CACTGCCGAGAATGTCTCACAGCTCTGGACGGTCTGCATTTCTGGACCTGGTGCAGATCCCAGGATCCTGGACTCTGATTTGATGCCTTAACGGTGGAAGGGGGTTGAGTATATTTTTTA	ENSG00000157927|RADIL|41
TGTGGGAGGGGTGTGGACTGTGGCCAGAGGAAAGACAGTGGCAAGGCATTTCCAAAGGTGGCCACCAACAGTTCCTCCCACAAAGAGAAGGGGGCTTATCTCTTCTTCCCTGCAATATTC	ENSG00000157927|RADIL|42
TCCGGCCTTCTGACTTGCTCCGAACAACAGGATGCAGCATAAGTGATATTCTGGGACCTTCCAAGCCAGACTGAAGGGCCTTTGGTTTCTATTTTCATGCTCCTGGAACTCAGCATCCAT	ENSG00000157927|RADIL|43
GGAAAGAAGCTCTTGGCATCACCCCAAGGAAGGGAGGCCCCGTGGAGTCGGGGAGGCCCAGCTAGCCTCTGGCCGCTGAAGCACCTAGCTGAGGTGCGGGACTGGTGAGGGCTGCCACTG	ENSG00000157927|RADIL|44
GCTGTTCTGGTCTTGCTGAGCTTCCAGGCGAATGCAGTCCCACCAGTGATCCCGGGGACACCACGTGGAGCAGAACGACTTCCCAGCCAGGCCCCAGACAATCTACAACACTGTGAAAGG	ENSG00000157927|RADIL|45
CCAACTGAAGTGGGGTGTGGGGGACCTCTCTCCTGGGGACCTCCCTGGAGGAGCCTCCACCCAGAGGACCCCCCCGCCCCGCCCCATCCCCAACCTGGGGATCCGGGGACCTCCTCGGCG	ENSG00000157927|RADIL|46
GGGGAGTCAAGGAGCCGAGAGTCCATGCCCAAGTTCCAAACTCCAGGCTCAGGTCCAAGGCCCCCTCGTTCCCTCACGGAGCCGGAGGATGGGGCCTCCCCTGTTGTATGGCTACCCAGG	ENSG00000157927|RADIL|47
CAGAGACCAGTGGGGCAGAGACAGGCCCAGTGCAGAGCGGCTCAGTGGGGCTGGAGGGTTCCTGGCTACAAGGCCTTGTTCTCAGTCCTGAACTGCTCGGATGTCACACCGGGTGGTCGG	ENSG00000157927|RADIL|48
CGGGAATTCAGAAGGGATGAGTCCTAGGGTGGGGCCAGTCACTGTGGCCAGGATCCCAGCCTCCTGTGTCCACAGGGCAGGGGACTCAGGGCTCAATCTGCTGGCCCCTGGGTTCCCACA	ENSG00000157927|RADIL|49
GCGCCACCGGGAAGGACAAGGGGACTGGGCACGGGGACCCCGGCCAGTGAGCGCCCGTGGCCCGGGACCGCCCCTCCCTTGAGCTCTCTCGCCGCGATCCCGGGCGGGTCTCGCCCCGCA	ENSG00000203867|RBM20|1
TGGTGCTGGCAGCAGCCATGAGCCAGGACGCGGACCCCAGCGGTCCGGAGCAGCCGGACAGAGTTGCCTGCAGTGTGCCTGGTGCCCGGGCGTCCCCGGCACCCTCCGGCCCGCGAGGGA	ENSG00000203867|RBM20|2
TGCAGCAGCCGCCGCCGCCGCCCCAGCCACCGCCCCCGCCCCAAGCCGGCCTACCCCAGATCATCCAAAATGCCGCCAAGCTCCTGGACAAGAACCCATTCTCGGTCAGTAACCCGAACC	ENSG00000203867|RBM20|3
CTCTGCTTCCTTCACCTGCCAGTCTCCAGCTGGCTCAACTGCAGGCCCAGCTCACCCTCCACCGGCTGAAGCTGGCACAGACAGCTGTCACCAACAACACTGCAGCCGCCACAGTCCTGA	ENSG00000203867|RBM20|4
ACCAAGTCCTCTCCAAAGTGGCCATGTCCCAGCCTCTCTTCAATCAACTGAGGCATCCGTCTGTGATCACTGGCCCCCACGGCCATGCTGGGGTTCCCCAACATGCTGCAGCCATACCCA	ENSG00000203867|RBM20|5
GTACCCGGTTTCCCTCTAATGCAATTGCCTTTTCACCCCCCAGCCAGACACGAGGCCCCGGACCCTCCATGAACCTTCCCAACCAGCCACCCAGTGCCATGGTGATGCATCCTTTCACTG	ENSG00000203867|RBM20|6
GGGTAATGCCTCAGACCCCTGGCCAGCCAGCAGTCATCTTGGGCATTGGCAAGACTGGGCCTGCTCCAGCTACAGCAGGATTCTATGAGTATGGCAAAGCCAGCTCTGGCCAGACATATG	ENSG00000203867|RBM20|7
GCCCTGAAACAGATGGTCAGCCTGGCTTCCTGCCATCCTCGGCCTCAACCTCGGGCAGTGTGACCTATGAAGGGCACTACAGCCACACAGGGCAGGATGGTCAAGCTGCCTTTTCCAAAG	ENSG00000203867|RBM20|8
ATTTTTACGGACCCAACTCCCAAGGTTCACATGTGGCCAGCGGATTTCCAGCTGAGCAGGCTGGGGGCCTGAAAAGTGAGGTCGGGCCACTGCTGCAGGGCACAAACAGCCAATGGGAGA	ENSG00000203867|RBM20|9
GCCCCCATGGATTCTCGGGCCAAAGCAAGCCTGATCTCACAGCAGGTCCCATGTGGCCTCCACCCCACAACCAGCCCTATGAGCTGTACGACCCCGAGGAACCAACCTCAGACAGGACAC	ENSG00000203867|RBM20|10
CTCCTTCCTTCGGGGGTCGGCTTAACAACAGCAAACAGGGTTTTATCGGTGCTGGGCGGAGGGCCAAGGAGGACCAGGCGTTGCTATCTGTGCGGCCCCTGCAGGCTCATGAGCTGAACG	ENSG00000203867|RBM20|11
ACTTTCACGGTGTGGCCCCCCTCCACTTGCCGCATATCTGTAGCATCTGTGACAAGAAGGTGTTTGATTTGAAGGACTGGGAGCTGCATGTGAAAGGGAAGCTGCACGCTCAGAAATGCC	ENSG00000203867|RBM20|12
TGGTCTTCTCTGAAAATGCTGGCATCCGGTGTATACTTGGTTCGGCAGAGGGAACATTGTGTGCTTCTCCCAACAGCACAGCTGTTTATAACCCTGCTGGGAATGAAGATTATGCCTCAA	ENSG00000203867|RBM20|13
ATCTTGGAACATCATACGTGCCCATTCCAGCAAGGTCATTCACTCAGTCAAGCCCCACATTTCCTTTGGCTTCTGTGGGGACAACTTTTGCACAGCGGAAAGGGGCTGGCCGTGTGGTGC	ENSG00000203867|RBM20|14
ACATCTGCAATCTCCCTGAAGGAAGCTGCACTGAGAATGACGTCATTAACCTGGGGCTGCCCTTTGGAAAGGTCACTAATTACATCCTCATGAAGTCGACTAATCAGGCCTTTTTAGAGA	ENSG00000203867|RBM20|15
TGGCTTACACAGAAGCTGCACAGGCCATGGTCCAGTATTATCAAGAAAAATCTGCTGTGATCAATGGTGAGAAGTTGCTCATTCGGATGTCCAAGAGATACAAGGAATTGCAGCTCAAGA	ENSG00000203867|RBM20|16
AACCCGGGAAGGCCGTGGCTGCCATCATCCAGGACATCCATTCCCAGAGGGAGAGGGACATGTTCCGGGAAGCAGACAGATATGGCCCAGAAAGGCCGCGGTCTCGTAGTCCGGTGAGCC	ENSG00000203867|RBM20|17
GGTCACTCTCCCCGAGGTCCCACACTCCCAGCTTCACCTCCTGCAGCTCTTCCCACAGCCCTCCGGGCCCCTCCCGGGCTGACTGGGGCAATGGCCGGGACTCCTGGGAGCACTCTCCCT	ENSG00000203867|RBM20|18
ATGCCAGGAGGGAGGAAGAGCGAGACCCGGCTCCCTGGAGGGACAACGGAGATGACAAGAGGGACAGGATGGACCCCTGGGCACATGATCGCAAACACCACCCCCGGCAACTGGACAAGG	ENSG00000203867|RBM20|19
CTGAGTTGGACGAGCGACCAGAAGGAGGGAGGCCCCACCGGGAGAAGTACCCGAGATCTGGGTCTCCCAACCTGCCCCACTCTGTGTCCAGCTACAAAAGCCGTGAAGACGGCTACTACC	ENSG00000203867|RBM20|20
GGAAAGAGCCCAAAGCCAAGTCGGACAAGTATCTGAAGCAGCAGCAGGATGCCCCCGGGAGGTCCAGGAGGAAAGACGAGGCCAGGCTGCGGGAAAGCAGACACCCCCATCCGGATGACT	ENSG00000203867|RBM20|21
CAGGCAAGGAAGATGGGCTGGGGCCAAAGGTCACTAGGGCCCCTGAGGGCGCCAAGGCCAAGCAGAATGAGAAAAATAAAACCAAGAGAACTGATAGAGACCAAGAAGGAGCTGATGATA	ENSG00000203867|RBM20|22
GAAAAGAAAACACAATGGCAGAGAATGAGGCTGGAAAAGAGGAACAGGAGGGCATGGAAGAAAGCCCTCAATCAGTGGGCAGACAGGAGAAAGAAGCAGAGTTCTCTGATCCGGAAAACA	ENSG00000203867|RBM20|23
CAAGGACAAAGAAGGAACAAGATTGGGAGAGTGAAAGTGAGGCAGAGGGGGAGAGCTGGTATCCCACTAACATGGAGGAGCTGGTGACAGTGGACGAGGTTGGGGAAGAAGAAGATTTTA	ENSG00000203867|RBM20|24
TCGTGGAACCAGACATCCCAGAGCTGGAAGAAATTGTGCCCATTGACCAGAAAGACAAAATTTGCCCAGAAACATGTCTGTGTGTGACAACCACCTTAGACTTAGACCTGGCCCAGGATT	ENSG00000203867|RBM20|25
TCCCCAAGGAAGGAGTCAAGGCCGTAGGGAATGGGGCTGCAGAAATCAGCCTCAAGTCACCCAGAGAACTGCCCTCTGCTTCCACAAGCTGTCCCAGTGACATGGACGTGGAAATGCCTG	ENSG00000203867|RBM20|26
GCCTAAATCTGGATGCTGAGCGGAAGCCAGCTGAAAGTGAGACAGGCCTCTCCCTGGAGGATTCAGATTGCTACGAGAAGGAGGCAAAGGGAGTGGAGAGCTCAGATGTTCATCCAGCCC	ENSG00000203867|RBM20|27
CTACAGTCCAGCAAATGTCTTCCCCTAAGCCAGCAGAGGAGAGGGCCCGGCAGCCAAGCCCATTTGTGGATGATTGCAAGACCAGGGGGACCCCCGAAGATGGGGCTTGTGAAGGCAGCC	ENSG00000203867|RBM20|28
CCCTGGAGGAGAAAGCCAGCCCCCCCATCGAAACTGACCTCCAAAACCAAGCTTGCCAAGAAGTGTTGACCCCGGAAAACTCCAGGTACGTGGAAATGAAATCTCTGGAGGTGAGGTCAC	ENSG00000203867|RBM20|29
CAGAGTACACTGAAGTGGAACTGAAACAGCCCCTTTCTTTGCCCTCTTGGGAACCAGAGGATGTGTTCAGTGAACTTAGCATTCCTCTAGGGGTGGAGTTCGTGGTTCCCAGGACTGGCT	ENSG00000203867|RBM20|30
AATATTTGTCCCAGCTGGCCGAGGAGGGCCTCAAGGAGACCGAGGGGGCAGATAGCCCGAGGCCAGAGGACAGCGGAATCGTGCCACGCTTCGAAAGGAAAAAGCTCTGATGCTTCTGCT	ENSG00000203867|RBM20|31
TCTGCTGCTACTGCTGCTGCTGCAAGGTTGGAAAGGAGAGCTTGCTGAAGTGGGGCCTTCCTGATTCTGGGGACAGGACTAAAGCCTGAGAGGAAGGAAAACCAAGCAGGGCACATTGCT	ENSG00000203867|RBM20|32
TGGGCTTGTTCCCAGAGACTCAGTGAAATGCCCCTGATATGTCTCCAGGAGCAAGTCACCCAGGTGTGTCCAGCCCACTGAGGGTCACCAACTCTCTCCCTGCTGACTCTTGTTTCTCTC	ENSG00000203867|RBM20|33
AATCTTTCAATTCGTTTTTCTCTCTTTTCCTCTTGTTCTTTCTCTCCCTCCCTCCTTATGTGCCAAGGATCGTTTCCTTTTCACAAAACCCAACTTCTCAGGGATTTTCACAGTGTTTAA	ENSG00000203867|RBM20|34
ATTCTTGGTAGGATATAACAGGTCAGGCCTAGCTGAGTCAGGCAAGGAAAAGGTTTAATGGAAACTCCTGGGTCAGGCGAACCCCTGCAGTGAGTCTACAGCAGTATCTCTGCCTGGTGT	ENSG00000203867|RBM20|35
CCCATGTATCCCCTGCATGAGGAGCTGAGTCAGGTCTGCAGTCCTGGTGAGGGGACATCACGGACAATCTGTTGGCAGAGCTGGGAGGGTCTTCATTAACCTCTTCCTCCAACTGGGCCA	ENSG00000203867|RBM20|36
CCCTTTTGAAAAGCCCCTGTTTTTAATAACTGTTTCATCCTCTCAGTTATTCTAGAAATCTGCCAGACTTATGCCTTAAAGTAAAATTAAATGAATTTTAGAGAAGATGAAAAGAGCCCT	ENSG00000203867|RBM20|37
TCATTTTGGAAGCTCTGATAAGTTTCCTCCAAACTTATTCCCCTCCTCTTGATTTCAGGAGATGTCAGGGTTTTTCTATTCTGGACAATGAATTTGGTACAGAGTCACTGTAATTAAATA	ENSG00000203867|RBM20|38
TAAAAACAGAAGCATCTTCCTCCAGCTAAAGCAGCAGTTGGCGCGGGCTTAGGTTGAATGCTGGCCTCTCTGCAAAGCACAGCTTTGGCTCGAGAGGCACAGCTCCAGGCTGTGGAAAAC	ENSG00000203867|RBM20|39
AGAGTTGTCTTGGGGGTTAAATGAGCTTATTTAAGTCAAGGAAACATCATCTGTCCTTGATTCAGCCTTGGTGCCTGCACTCTGGGGTACAACCACCTCACAGTAGGATGGTTTTTAAAT	ENSG00000203867|RBM20|40
GGCCCCCCAGTTGGGGGAGAAGCTAAGGAAAGAGAAGGCTGCAGATCCAAAGAGTGGCATTGAAGTTTGCTGGGTGTCTGTAGGTGGACCCTTTCCAGCTGGGCAGATAGTTGAGGGCTC	ENSG00000203867|RBM20|41
CCTGGGTTTGACTGTATGTGCAGACTTTGATACCAAAATGTTATGAAAAGTCGTGATTCCCGCTGCTCTTTCTGGTACTGGAGGGTGGGTACCTTCAGGCTGTGGGGTCTCTAGCCTGAT	ENSG00000203867|RBM20|42
ATTCCATTGAAAGGGTGTGGGATAAAGGTGCTGGGGGAAATGAGGCTCTGCCACAGCCATAGAGAGGCCCTCGGGCAGTTAAGAAGGGAGCCTGGAGCTGTTTTCATGAGCAGAGATACT	ENSG00000203867|RBM20|43
CTCCTGAAAGCACCCTTCATAGCTTAGCCCAGGAAAAATAAAACAAGGAAGACAGGTCACTCTCCCCTAGGCAGTTCCTGTTGTTTCTGTTCCTGACCTTGGGCAGGCAGACTGAGAAGG	ENSG00000203867|RBM20|44
GACTGTGTAGGGTTTTGTTTTGTTTTTTTTCATTTTCCTTTTTATGGCATGTGAGAGCATACTGTACATTCTGTCCTCTGTACTAATGGAGGAAGGGCAGAGAGATTAGTTCAAGGCTAA	ENSG00000203867|RBM20|45
CATTTTATATCAGGTAACTGAGGCACACAAAGGGAACAAATGAAGAACATAAAATGATCAGTGTAAACCTGAAAGCACGCAGTCATTGGCAAGGGACAGGCTCATGGGAGCTGGTGAGAG	ENSG00000203867|RBM20|46
AGAGCAGTTAAGGCAAGCACCAGGGGAAAGCAGACCAACTTGAACAGATGTGATGCGGAGAGGTTGGAAGAAGCAAGAAACCTGAACTCATCATCAGGCTATTAAATAAAATTTATAGGA	ENSG00000203867|RBM20|47
GGCTGTTGGTTTGGACTGAGCTCCTGCAATAGGCCCAACAGACCAAAACAAAAGGGAGTCACTCATGTTGAAGTTCTGTCTTCCAGGAAATCAGGAGAGAGAGAGAGAGAAAGAATAGCC	ENSG00000203867|RBM20|48
AAATCCCCAAACAGGCCAGTTTTAACCAGCATGATGAAGTGTCCTTGGTTTTAACCTTTATAAGGAAAGCAGCTTTGAGATGACCAGTCTGGTTTTTGTTCTTTGTGTCTGCTTTCCTCA	ENSG00000203867|RBM20|49
GCCCTTTTCTGTCTATAAAGCCAACCTCCTCCGCTCAGCTCATGGGAACACTCATTCTATTTTATAGAATGACATGTTGCCCAATTCTAGAATCAAAAATAAAGGCCAACTAAGATCTTC	ENSG00000203867|RBM20|50
AAAGTAAATTTGTTGTAATTTTATCTTTTGAGAAGACCATATGGGGGCTGCTGAAAAGTTGGTATCTCAAATAAAGTCTGAAGATCACGGCTCAGCCCAGATTGTTCCCCTGGCCAACTC	ENSG00000203867|RBM20|51
CACAGGTTTGAACCTGGCATTCTGGACACCAGCTATGCCTCCTCCATTTCTCAGAAAACCTTTGATCTTGTGTGTCTTTCTTCCTACTGAAGGGAATTGTGGGGGCAGTTCTTTGGCCTT	ENSG00000203867|RBM20|52
CTTGCTGAACTTTGCTGGAAATAGCCCACAATTTTTATCAGAGGTTAGAACTGTACATTATCAGAGAGACTGGACACTTTATCCCCTAGCAAAGTGGGAGAAGATTTTACCAGCTCATTC	ENSG00000203867|RBM20|53
CACTCCACCCTGGCCTTCCCCCACCCCCCATCCCCAGCAGCATTTCCATGGAAATCCAGATGGTCGTGTAGTGTTATGGCTCTCTTGTGATAGACTGGCCTTCATATTGGAGAGCTAGGG	ENSG00000203867|RBM20|54
AGAGCCCCTGGGAGGGAGAGAGATAAGGCGCTATCTGCCTTCAATCAGAACCTTCGGTTTAAAATCATCTAAGAGTCTATACTTGTGTGTACATACGTATTTATTTTTATTTATTTTTAT	ENSG00000203867|RBM20|55
ACAATTCCATTGGCATGGTCCTTCACCGACCCTATGATTTGCACTTTTTATTTCTATGTGTGCCACACACAATGCAGTATTAATGGCAACCAGGTAAATATTGATTTATTTTTTAAAGCT	ENSG00000203867|RBM20|56
TTTCTTCAGTGTTTTGTCAACCATTTCAAAGTGTCTCCCAAAAAAGGATGCTGAAGAGCAATTGCTCCCTTAAGCAACAGATTCATATTTACCCTGGGTTAATACAACAAAAGGCCTGTA	ENSG00000203867|RBM20|57
TAATTGTCTTTTCATTGTTAACACCCAAAATAGCATCTATCTAGACAGTATCCCCAAAGAATTTGGAAAATCTGATGGTGTGAGCAGCAGCCGTTAGTATCAGGGTTTCCCATTCTTGGA	ENSG00000203867|RBM20|58
CAGTCCGAGGCTGTGACCTGTTAGATAATTAGATTATACTTGAACTGGACCAGAGTTTGTTTTTTGAATTTATGAGAAAAACCAAAACACTAAGTTAAGTTTGAACTTGTAAAGTATTGA	ENSG00000203867|RBM20|59
AATTTGTTGAGTGTCCTATAAATTGTCACTACTTTTCCTGATCTGTATAACTGACTGCAAAGTGTTTGTTTTTACAAAAGAGAAAAGAAAAGATTTTTAATAAAGAGAATTTGAAAGCTG	ENSG00000203867|RBM20|60
GGGCTGTTTCTGGAAAACAGAGTTGTTTTGGGAGTTAAATGAGCTTATTTAAGTCAAGCAGTTAGAACAGCACTTGACACTAGATAAGGGCTTTGGAAGTGTTTGCTATTATAGCTGTAC	ENSG00000203867|RBM20|61
ACCTATTATGGCTCCTCTCACCGGGGCTGCATAACCCTTTAGCCTGCAGGACTGGTCACTACTGGCATGGAGACTTCTAGGGAGGGGTGGAGTTCGTGGTTCCCAGGACTGGCTTTTATT	ENSG00000203867|RBM20|62
GCAGCGCTGTCCACTACAGGAACTTACAGGTAAAAATCCACTCTCCTTGCCCAGCATGCCAGGGGCTCCCCAGTCTCCATAACCGAGCCAGGTGTCTGGCGTCCTTGGCCTTGCTTGCCT	ENSG00000203867|RBM20|63
CTGAGTCTAGCTCCTACCTGCAAGGCCTACTCCAGGCCACAGGTTACTTGCCATTCCCCAAGCACACCAGGCTGTTTTCTGCTTCTGTGTCTGTCTCCTTCCACTACATGGAAAACCCCT	ENSG00000203867|RBM20|64
AATCTTCCCATAGACTTGATTCCATCAGGCTGCTCTCGACATGGTGGCTACCTCCTGTGTTGCTCCTAGCACATGTCTCTACTTTAATACCTAAAACATCCTGTTTGGGTTGGCTTTGGC	ENSG00000203867|RBM20|65
AGTTTACATTGTTGGGCGACTTTTGCAACAACTCGCCGCGCCGCGGCCTCCGCGCGCCGCCGCCGCCACCGCAGCCGCCG	ENSG00000186350|RXRA|1
CGCCGCGCCCGCCGCCCGCTGCCTGCGCCGCCGGCCGGGCATGAGTTAGTCGCAGACATGGACACCAAACATTTCCTGCCGCTCGATTTCTCCACCCAGGTGAACTCCTCCCTCACCTCC	ENSG00000186350|RXRA|2
CCGACGGGGCGAGGCTCCATGGCTGCCCCCTCGCTGCACCCGTCCCTGGGGCCTGGCATCGGCTCCCCGGGACAGCTGCATTCTCCCATCAGCACCCTGAGCTCCCCCATCAACGGCATG	ENSG00000186350|RXRA|3
GGCCCGCCTTTCTCGGTCATCAGCTCCCCCATGGGCCCCCACTCCATGTCGGTGCCCACCACACCCACCCTGGGCTTCAGCACTGGCAGCCCCCAGCTCAGCTCACCTATGAACCCCGTC	ENSG00000186350|RXRA|4
AGCAGCAGCGAGGACATCAAGCCCCCCCTGGGCCTCAATGGCGTCCTCAAGGTCCCCGCCCACCCCTCAGGAAACATGGCTTCCTTCACCAAGCACATCTGCGCCATCTGCGGGGACCGC	ENSG00000186350|RXRA|5
TCCTCAGGCAAGCACTATGGAGTGTACAGCTGCGAGGGGTGCAAGGGCTTCTTCAAGCGGACGGTGCGCAAGGACCTGACCTACACCTGCCGCGACAACAAGGACTGCCTGATTGACAAG	ENSG00000186350|RXRA|6
CGGCAGCGGAACCGGTGCCAGTACTGCCGCTACCAGAAGTGCCTGGCCATGGGCATGAAGCGGGAAGCCGTGCAGGAGGAGCGGCAGCGTGGCAAGGACCGGAACGAGAATGAGGTGGAG	ENSG00000186350|RXRA|7
TCGACCAGCAGCGCCAACGAGGACATGCCGGTGGAGAGGATCCTGGAGGCTGAGCTGGCCGTGGAGCCCAAGACCGAGACCTACGTGGAGGCAAACATGGGGCTGAACCCCAGCTCGCCG	ENSG00000186350|RXRA|8
AACGACCCTGTCACCAACATTTGCCAAGCAGCCGACAAACAGCTTTTCACCCTGGTGGAGTGGGCCAAGCGGATCCCACACTTCTCAGAGCTGCCCCTGGACGACCAGGTCATCCTGCTG	ENSG00000186350|RXRA|9
CGGGCAGGCTGGAATGAGCTGCTCATCGCCTCCTTCTCCCACCGCTCCATCGCCGTGAAGGACGGGATCCTCCTGGCCACCGGGCTGCACGTCCACCGGAACAGCGCCCACAGCGCAGGG	ENSG00000186350|RXRA|10
GTGGGCGCCATCTTTGACAGGGTGCTGACGGAGCTTGTGTCCAAGATGCGGGACATGCAGATGGACAAGACGGAGCTGGGCTGCCTGCGCGCCATCGTCCTCTTTAACCCTGACTCCAAG	ENSG00000186350|RXRA|11
GGGCTCTCGAACCCGGCCGAGGTGGAGGCGCTGAGGGAGAAGGTCTATGCGTCCTTGGAGGCCTACTGCAAGCACAAGTACCCAGAGCAGCCGGGAAGGTTCGCTAAGCTCTTGCTCCGC	ENSG00000186350|RXRA|12
CTGCCGGCTCTGCGCTCCATCGGGCTCAAATGCCTGGAACATCTCTTCTTCTTCAAGCTCATCGGGGACACACCCATTGACACCTTCCTTATGGAGATGCTGGAGGCGCCGCACCAAATG	ENSG00000186350|RXRA|13
ACTTAGGCCTGCGGGCCCATCCTTTGTGCCCACCCGTTCTGGCCACCCTGCCTGGACGCCAGCTGTTCTTCTCAGCCTGAGCCCTGTCCCTGCCCTTCTCTGCCTGGCCTGTTTGGACTT	ENSG00000186350|RXRA|14
TGGGGCACAGCCTGTCACTGCTCTGCCTAAGAGATGTGTTGTCACCCTCCTTATTTCTGTTACTACTTGTCTGTGGCCCAGGGCAGTGGCTTTCCTGAGGCAGCAGCCTTCGTGGCAAGA	ENSG00000186350|RXRA|15
ACTAGCGTGAGCCCAGCCAGGCGCCTCCCCACCGGGCTCTCAGGACACCCTGCCACACCCCACGGGGCTTGGGCGACTACAGGGTCTTCGGGCCCCAGCCCTGGAGCTGCAGGAGTTGGG	ENSG00000186350|RXRA|16
AACGGGGCTTTTGTTTCCGTTGCTGTTTATCGATGCTGGTTTTCAGAATTCCTGTGTGGCCCTCCTGTCTGGAGTGACATCTTCATCTGCTCTGAATACTGGTGCCCAGCCAGCCCGTGA	ENSG00000186350|RXRA|17
CAGCTTCCCCCTAATCAGGAGGGGACAGCTGGGGGCGCAAGCTGGTGTGTCATCAGCAAAGACCTCAGCCGCCTCGGGGATGAGAGGGGACTCGTGGGGCAAGCAAGCTGCCCTGTGCTC	ENSG00000186350|RXRA|18
TGAGTGAGGGGGAAGGTAGCCCCTTTTTCCAAAGATAACTCACAGTTTTGCCCTCGAGCCAATGAGAACATGAGCTGCCCTCTGTGCAAGGTTTCGGGGCCACCTCCAGGCTGCAGGGGC	ENSG00000186350|RXRA|19
GGGTCACTCACCCCCCTGTTTTCTCTCTGCCTTGGTGTTCTGGTTTCAGACTCCCGACTCCCCGTTCAGACCAGAGTGCCCCGGCCCCTCCCCAGCCTGAGTCTTCTCCTTGCTCTGCGG	ENSG00000186350|RXRA|20
GGTGGGCTGAGGCTTGTCCTTGTTTCCTGCAGGGCTGGCCCTGGCTCGGGCAGGGTGGGGCATCACCACCTCACTGGCCTTGCTGGAGGCACAGGGCTCTGCGGACCTGCAGCCATCTGT	ENSG00000186350|RXRA|21
GAGGCCCGCGGGGATGGGAGGGGAGGAGGGTGGCCTGTTGGTTTCCCTCAGAGGGGGCAGGTGGCCTGGAGAGAGAGGGGCTCAGGAACTGGGAGCCTCGTGGGTGGGGCAGATGCTCCG	ENSG00000186350|RXRA|22
CGGCCTGGAGTGGCTCTGCCGGGGCATTGGTGGGACCCCTGCTCAGGCCTTCTCTCTGGCTGCCAGTTGTGTCTAAAAGACTCTTGGAATCTGAGAACCCGGAGTCGCAGCGCCCTCGGG	ENSG00000186350|RXRA|23
CCCTGGTGGGACCACCCAGCCTGGTATTGTCCACGGACAGCGTTGTTCACCCAGAGCCTTACTTGGGAGCCTCACTGAACGCCTGCTCTGGTTGAAGGTGGGGTGGGGGCGGGGCTTGGG	ENSG00000186350|RXRA|24
GCCTCCCTGGCTCAGCCCAGTGCGGCCTGGCGCTCCTCCCGCAGGCTCTGCCCCCGGGCTCCGGTGGTGCGGGGCCCTCTCAGGTTGAACTCGCCTCTTTTGCACTGGAAGGCCCTCCCT	ENSG00000186350|RXRA|25
TTGGCCTGAGTACTTTTCCCGTTCACGCCTCAGTCCCGTGGACCCAGCCTTTGTCAGTGGCAGGTGCCTGAACAGAGGGTGGATGGGGGGGATACCGGAGGGGGTCTTGTCTTCCCAGCC	ENSG00000186350|RXRA|26
GCAGTCTAGGAATGATGCGGGGGGGTGGACGCCTTCTCCATAGTCTTTCCCCACCTGGAGCAGGGGCTTCCTCAGTGGTGAGGGGAGCTGCCTACAGGTTGGACCGGGAGGCAGTGGCTT	ENSG00000186350|RXRA|27
GGAGAGGCAGCTTTCCAGCCTTGGTGGGGAAGAAAGTGTCCATTCTTTGCCTTCCTGGAGCTCCCAGCCAGAGCTGAGCTTAGGCACCCGAGTGGAGCCTGCAGCTGAGTCTGTGCCCGA	ENSG00000186350|RXRA|28
GACAGGCTGTCAGAGATTCCAGAAGCCTCTCCTCCCCGCCGCCCTCCACCCCTGCCTTTCAGCGTTGTGGATCCCTAGAGGTGGCCCCCTGCCCGATCCACCGTCCTGAGGCAGAGTGTT	ENSG00000186350|RXRA|29
GAGCCTCATACCTGTACCAGGTCCCCGGCCAGCTGGGCCCCTCCCAGGCACTGCCAGGAAGCCCCAGCTGCCCCTGGCGGGTGTGGTGGAAATGGCAGGAGGGTGCAGGTACTCTTGGGG	ENSG00000186350|RXRA|30
CCCCAGCGGTGGGAGTGCAAAAGACCCAACGCCAACACCTGGTGCCTTCTGCAGCCAGCGCCCACCCATCCGTGCCCGGACCCTTGGGAATGCCCGCGGCTCCAGAGGAAAAAGCCCAGG	ENSG00000186350|RXRA|31
GACGGGGCCTCCGTTGCGGGGGGTCGGCTGCTTCTTGGGAACTTTGTCGTTTCCGGCGCTGGCTGGCTGGCTGGCTGGCTGTAAAGCACTGAAGCCCCCCGGCCGCCAACCCCTGAAAGC	ENSG00000186350|RXRA|32
AGAACCTGGCCTCCCTGGCCACAGCAGCCTTACCCACCGCTCTACGTGTCCCGGGCACTTCCCGCAGCCTTCCCGTCCCTTTCTCATCGGCCTTGTAGTTGTACAGTGCTGTTGGTTTGA	ENSG00000186350|RXRA|33
AAAGGTGATGTGTGGGGAGTGCGGCTCATCACTGAGTAGAGAGGTAGAATTTCTATTTAACCAGACCTGTAGTAGTATTACCAATCCAGTTCAATTAAGGTGATTTTTTGTAATTATTAT	ENSG00000186350|RXRA|34
TATTTTGGTGGGACAATCTTTAATTTTCTAAAGATAGCACTAACATCAGCTCATTAGCCACCTGTGCCTGTCCCCGCCTTGGCCCGGCTGGATGAAGCGGCTTCCCCGCAGGGCCCCCAC	ENSG00000186350|RXRA|35
TTCCCAGTGGCTGCTTCCTGGGGACCCAGGGCACCCCGGCACCTTCAGGCACGCTCCTCAGCTGGTCACCTCCCGGCTTTGCCGTTCAGATGGGGCTCCTGAGGCTCAGGAGTGAAGATG	ENSG00000186350|RXRA|36
CCACAGAGCCGGGCTCCCCTAGGCTGCGTCGGGCATGCTTGGAAGCTGGCCTGCCAGGACCTTCCACCCTGGGGCCTGTGTCAGCCGCCGGCCCTCCGCACCCTGGAAGCACACGGCCTC	ENSG00000186350|RXRA|37
TGGGAAGGACAGCCCTGACCTTCGGTTTTCCGAGCACGGTGTTTCCCAAGAATTCTGGGCTGGCGGCCTGGTGGCAGTGCTGGAGATGACCCCGAGCCCCTCCCCGTGGGGCACCCAGGA	ENSG00000186350|RXRA|38
GGGCCCTGCCGGAATGTGCAGCCTGTGGGTAGTCGGCTGGTGTCCCTGTCGTGGAGCTGGGGTGCGTGATCTGGTGCTCGTCCACGCAGGTGTGTGGTGTAAACATGTATGTGCTGTACA	ENSG00000186350|RXRA|39
GAGAGACGCGTGTGGAGAGAGCCGCACACCAGCGCCACCCAGGAAAGGCGGAGCGGTTACCAGTGTTTTGTGTTTATTTTTAATCAAGACGTTTCCCCTGTTTTCCTATAAATTTGCTTC	ENSG00000186350|RXRA|40
GTGTAAGCAAGTACATAAGGACCCTCCTTTGGTGAAATCCGGGTTCGAATGAATATCTCAAGGCAGGAGATGCATCTATTTTAAGATGCTTTGGAGCAGACAGCTTTAGCCGTTCCCAAT	ENSG00000186350|RXRA|41
CCTTAGCAATGCCTTAGCTGGGACGCATAGCTAATACTTTAGAGAGGATGACAGATCCATAAAGAGAGTAAAGATAAGAGAAAATGTCTAAAGCATCTGGAAAGGTAAAAAAAAAAAATC	ENSG00000186350|RXRA|42
TATTTTTGTACAAATGTAATTTTATCCCTCATGTATACTTGGATATGGCGGGGGGAGGGCTGGGACTGTTTCGTTTCTGCTTCTAGAGATTGAGGTGAAAGCTTCGTCCGAGAAACGCCA	ENSG00000186350|RXRA|43
GGACAGACGATGGCAGAGGAGAGGGCTCCTGTGACGGCGGCGAGGCTTGGGAGGAAACCGCCGCAATGGGGGTGTCTTCCCTCGGGGCAGGAGGGTGGGCCTGAGGCTTTCAAGGGTTTT	ENSG00000186350|RXRA|44
CTTCCCTTTCGAGTAATTTTTAAAGCCTTGCTCTGTTGTGTCCTGTTGCCGGCTCTGGCCTTCCTGTGACTGACTGTGAAGTGGCTTCTCCGTACGATTGTCTCTGAAACATCGTGGCCT	ENSG00000186350|RXRA|45
CAGGTGCCAGGGTTTGATGGACAGTAGCATTAGAATTGTGGAAAAGGAACACGCAAAGGGAGAAGTGTGAGAGGAGAAACAAAATATGAGCGTTTAAAATACATCGCCATTCAGTTCGTT	ENSG00000186350|RXRA|46
ACAGATGCCCTGTGCATGGGGTGGGGATGAAGGAGGGCTGGGGGCTCCGTGACAGACAGTGGGAGGGGAGGCTGGCTGTCCTGTGGTGAGCTGCTTCTGGGGCACCCTGAGATGGGGCCT	ENSG00000186350|RXRA|47
CCCTTCACTTCCTGGCCATCCAGGCATCTGTGTCTGTGTCCGGGAAGTGGAGGAGGGCCCCCAGGACCGAGTCGCTGCCCATCACTGACCGTCTGTGGCAGGCACTGCCAGTGGCCGTGG	ENSG00000186350|RXRA|48
CCCAGGGTCTTGGTGGCTCGGCCTCATGGGGGGCTTGCTCCAGGCCTTGGGTGATGCTCCTGTGCTCCCTGACAGCCGCAGGGTCTCACCCTCCTGCTCCAGCCCCTCTCTGACCCCACC	ENSG00000186350|RXRA|49
CTGCGGTCCTGGGAGGTAGCAGGACAGCCCCAGTATGCGGATGAGAAAACCTGAGGCCCAGCCTGGGCGGGTTCGTGGGTCCAGCTCAGCCCCTCTGTGCCTGTGGTCTGTAGGGACCTG	ENSG00000186350|RXRA|50
GGCCCAGCTGCCCCTAAGGATGGAGCTCAGTCTTCCCCAGCTCCAACCCTGGGGCCTTGTGTGGGAGGGGCAGTGGCCCTGGGATCTGGCCTTGGCGGCTCCAGCCCCCTCTCCAGTATG	ENSG00000186350|RXRA|51
GCAGAGCCTGGAGGCCTGCTGGTCTCTGGGTCTGAGACTCTGGCCTCCCAGCCTGCTCCCCTGGGGGTTGGTGGAGGCCTCGGGGCTGTCGGAGCTTCAGGATTAGGGACTGAAGCCCAG	ENSG00000186350|RXRA|52
CAGGGGCTCCCTTTTCTGTGCCCCCTGCCTGAGCACAATCTTCCTGCCCTCTCCCCTGCAGCCCCTCTGTTGTCGTGGTCAGTCGTGCCGCCTGAGGGCCAAGTGTGGCCTTGGCACTGC	ENSG00000186350|RXRA|53
ATGAGCACCACTTGCTTGCGACCAGCTCCAGGCTGCCTGGAAGAGACTCCAGCTCTGCTCAGGCACCTCCCTCAGGCCCCTTCCTGCCCGCTCAGCCGCCGCGCTGCATCACCCGAGGCT	ENSG00000186350|RXRA|54
GTGGGACCCTGAGCCCGCCGGCCAGCGGCCGATGGGGCCGCCCCTGTGGTGGGACCTCTCGCCTGCCCTCGCCATGAGGCTGCACCTCCTTGCCTCTCTGTCGGGCGGTGGACTGGCCTG	ENSG00000186350|RXRA|55
CTGGGTGCCAGGCCCAGCCTGGGCCTCCCTTGTGGGGTGCTCAGGCCCCACTTCCCTCCCTGGGGAGGGGAGGAGAGGCCACCTCGAGGGAGTGACGTCAAGGCAGGGTGACATTAGTCT	ENSG00000186350|RXRA|56
GGGCCCACGGGATCCTTGCTACTTCCCCATTTATGGAGGGGAAACTGAGCCCTGGGTTCGACGGGGGAAGCAGTCGCCTGATGGGCAAGTGCTCTCTGAGTGGTGCATGAAGGTGGCTGT	ENSG00000186350|RXRA|57
CCACGTGGCTGTCTGTGGTGTCGGTTAATCGTCACGGCTTCCGGGAGTTAAAGGCCCAGCCTAAAGCCGGGGTCAGGCGCAGAACAGTACCTTGGAGGGGAGCTCTGGGCACACCTGGCC	ENSG00000186350|RXRA|58
GCTGGGGTTGGCTGCAGGCTCCAGGAGTTAGGTTCCAGATGGATTTCAGATGGGACTTTCTTGCTAACCCTACTTTTTTTCTGATTATAAAAGTAATAAAGACTCCTTGTAGAGAAGGAG	ENSG00000186350|RXRA|59
GCAAAATACAAAGAAGAGTGTGAAGCCCCCATCACTCCATTAATGTTCACCAGTCGGGGGGTGGGAGGTGTTTTCCTTCAGATTTCTGTGTATACATTTATAACTGGCATCCTTTTGTGT	ENSG00000186350|RXRA|60
GCAATGTTAACCGCCTTTTGTTTTCACTAAGCAATGTATTATGTTGAGCACCCATTTTGGGGGAGTAGACAGCCTGCACCATGGTCAGCCCGCAGACAGGCTGCACGGATCCAGGCACCT	ENSG00000186350|RXRA|61
CGCTGGCTCCAAAACCCACGAAGTGACCCCACCCAGGATGTCAGAGTCTCTGTCACTCCCGGGCAGGAGGAGACAGTGATGACGGGAAGGAGATTTCTCCACCCAGGTGAACTCCTCCCT	ENSG00000186350|RXRA|62
GCAAGGGGAGGGGGTGGGGCCTGGGGTGGGGCTGTGGCTTCAACTGCAGGACGACCGCCTCATCTTGAGGCCTCTGGGAGGTAGGTGCTGTGGTCTCCCCGCTTGACGCAGAGTATACAG	ENSG00000186350|RXRA|63
AGCCTCGGGGAGCAGAGTGCCGTGGGGGTTTGAGCCCAGGTGGGGCTGACTGCTGAGCCTGGGCCTTTGGATCATCAGCCGAGGTGACTTGCAGCTGGTTATCTGCCCACGTGGCCCCTT	ENSG00000186350|RXRA|64
CCCATGCCGGAGGGCTCGGGACTCCCTGTTCCCATGACTGGGGGACTCAGCAGAGAGAGGCTGTGGCCTCCCTCAGGCCTAAGCCTGCTTCCCCAAAAGCTTGTGCCCACACAGCCTGGG	ENSG00000186350|RXRA|65
TCCTCCCCTGAAGTCTCTGCTTACACCCAGGCCAAAGGGCCCCCAGGGAAGGCGTGTTCGGGCTCAGGGCAGCTGCGTCCCCTCTCAGGGATGCCGGCCCTGGGACCTGCAGTGGCCAGG	ENSG00000186350|RXRA|66
TGTGGCAGCGGTGCTCTGTGGTCTCGGCTCCCCCACGGCTCTGTGGGCGCCTGGCCGTCTGTGGGGCGTGGGGACCTTTTCCACAGTTGAGGTTTGCTCAGTCGCTTCTCCAGCTCAGCC	ENSG00000186350|RXRA|67
TGGCCCTTTGGGCTGTTTCTGGATCAGGAAGGGCTGGTGCCTGGCAGAGCCTGGCGCAGTCCAGGTCTTGTCATGGAGAACTTGGGGACCTGGTCCGTGCTCCCCTTCTTCCTTGGAGAA	ENSG00000186350|RXRA|68
GACACCCCGAGTAGTGTCTCTTGTGGAGTTGTTCCCAGCCCTGGGGTGTCCGGTCTGTGAGGGTGGAGGGCGAGGCTGGGCCTCGTCCCCTGGCTCCCGGTGGTTGCTTGTGGATTTCCA	ENSG00000186350|RXRA|69
CCTGGCCGGCCGGAACCTCCCAGACTCCCACTAGGCCCTCCCTCTCCAGGGGCTCCTCACATGAGCAGGGGTGCTCCTTCCGCTCTGAATTTCTGTGTTTGGGTTTCACCCTGTGTTCCT	ENSG00000186350|RXRA|70
AGTAGCTGAAGGCTCCATGGCAGAGTTTTGGTGCCATCTCAGGACAGCCCACCCGGGTGGGACTCGCCCTAGGAGCTCCTCTGCCCACACACAGCTGACAGCACCAGATGTGTCCTGTGG	ENSG00000186350|RXRA|71
ACTCCCAAACCCCCTGCTGCCCTGCCTCAGTTTACCTAGGGCAGGCACTAGGCCCAAGGGATTGCATGTGAGGGGGCCAGGAGGCAGCAGGTGGACACCTAGTCCCAAGCCCCCATGCCA	ENSG00000186350|RXRA|72
TCTCCCGGGTAGTCCAGGACTGCTCCTGACCTAGGACTGGGCTGTAGTTGGGGTCTGGAGCCGGCCTGCTGCCCATCCACCTGGCCCTGTTTAGAGCTGGCCTTGACCTCCCGAGCTCCT	ENSG00000186350|RXRA|73
TTTCCCTGGAGAATCTTGCTGGCTTTCTGGGCCAACCCCATCAAAGCCCCTCTGCTTTGGGGGATGTGTGCAGAAGAACTGGGGCCTCTGCTCCGTGTCCCCCTCATATCACCTGGCCTT	ENSG00000186350|RXRA|74
CCGAAAGCAGGCAGCAGGCCCAAGGTGCTGGCACGAGGGAGGCCTGGTCATGTTATTTTTAGCACACCAGCCCTGCCCCTGCTCTTGTTGGCAGCATGGTGCCCTGTGGCGAGAGGGCGA	ENSG00000186350|RXRA|75
TGAAGACTCGGCTTCCGCCTGTCCCTTGGCTGACTGGCTGGCACCTGCTGGGTCCCAGGGCCCCAGGATGCCCCTTGCTGGGTCCTCCCAGGTCTGCCGCCTGTCCTGGACACCCAGGGG	ENSG00000186350|RXRA|76
TCTAGTGCACAGTAGGTTACCCCCTGCGGGTGGCAGTGGTGCTCCCAGAATCCTCAGGGATGCCTGGTGTCCTCCGCACTGTTGAGCTCTTCTCGGGGAGGGGATGGGCAGCACTAGGGG	ENSG00000186350|RXRA|77
GGCTCCTGGCACAAAGTAGGGACTTGTTGAAGCCAAGTTGCTTGGGAGTGAGTGGTGCAGGTCCCCTTGACATTGGCGAGGTCCCCGGGGTGGGTGTGGGTGAGGAGCAGACGCGGGTTG	ENSG00000186350|RXRA|78
CCCCAGACGTTCCCTGCCCGGCCGCTGTTGGCGTCGGTCTGCCGTTGGGCTGTGGGTCTCACCCGCAGTTAGTTTGCCGTGGTCTGAGGCCCATGCTTGACTTGGCCCTGGTTCCCCAGA	ENSG00000186350|RXRA|79
ACCCATAGCTCCTTCCCTGGGGGTTGAGTCCAGCTTTGAGGCCTCAGCAGTTTGTCTTGGAACCCTGGGGTTCCTCACATTCATGGGAGTGTGAGCAGGGTTTCAGGAGGGATGTGCCCC	ENSG00000186350|RXRA|80
CACTCCTAGCCCCAAAACCACAACCGCAAAGTCAGAGTCGCTGGAGCCAGAGAGATTCTCTGACTTCTGCTGCTGTTGGGGAGGGCCAGGCACTCTGCCAAATGCTGCCTTCTGCCTTCT	ENSG00000186350|RXRA|81
CAAGTCCATGGCCAGGAAGGGCCTTCCATGTGGCGGCGTCCAGGCCACTCGCCCCTCCTGGTGGGGGAATAGGAGTCTGGGGGGGCTTGGGTAGACCCAGGCCAGACCGCAGCTGCCTGG	ENSG00000186350|RXRA|82
CCCCTGAGCTGTCCCAAATCTCTTCCCTGGTCTGCAGGCTGTACTCCCAGAGCAGGCCCGGGGGACATTCCCCACAGTGTCCCAGAGCCTTCCTGGCTGCAGCCGGCTCACCTGGGCGCG	ENSG00000186350|RXRA|83
TTGCAGGTATTGGTGGAGTGAGTTGGTGCCAGCTTCCACACAGCACTTCTGAGTGCCCGGCATGGAGCTGGACTTGGTGTCAAGGCCTCTGAGCTCTAGCAAAGCCTCCTGGTGGGAGGG	ENSG00000186350|RXRA|84
CCTGCCCAGGGCCTGTGGGGCTGTGATGTGTGCACAGGGAGTGTGGACGCGAGGCTGAGCGGGCTTCACGGGGTCGGAAGCAGGGCAGCACAGGCGCCTACCCGCCAGGGACTGAGGTCG	ENSG00000186350|RXRA|85
GAGGGGAGTGTGCAGAGGAGCTGGTTTGCTCCTGCCTCGATGGACAGATGAGGTCCAGCAAGGTCCAGGGGCCTGCTCCTGGCGCAGAGTGGGCCTTTCCCAAGTCGGGGCTGGTGGAGA	ENSG00000186350|RXRA|86
GACCCTTCAGGGGCTCAGGAAGGAAGGGTGTGGTGGGTGTGAGGAGAGAGCCAAGAGACGGGCAGGAGACCTGGGTGGGGCATCGAGGCGGCGGGAACTGAAATAAGTGCCAAGGATCTG	ENSG00000186350|RXRA|87
AAAGGGGAAATGCGATGGCCCCCACCCTGGCCACGCGTGGAGTCCTGAGGCTCCAGCGAAGCAACAATGGCAGCCTGGCTCTCCTGGGAGCGGGAGCAGGGAGTGTGGGAGGAGACCCTG	ENSG00000186350|RXRA|88
GATAGCTGGGGGGCTGTGGAGCCCACTGGGGGAGGGACAGACCAAGGCAGACCCCCGGGGCGGCCCTGTGCTGTGCTCCGGGGGCTGTGAGCCAACCCGAGGCCCAGCAGCCTGGGGCTG	ENSG00000186350|RXRA|89
GAAGGGCGGAAGAACGCCCGCCTGGCCTCCCCATCCTGGCACAGCCTTGCTTCTGTAGCCTGGACCGTCCTCCAGGTGAGCCCAAAGAAGCAAGGTGGGTGGCCCCAGGGCCTGCAGCCT	ENSG00000186350|RXRA|90
GGATGGGCACCTCAGCCCGGGCTCCACTCTTCTCAGATGTGCAGAGGCTCACCGGGCCCTGGGCTCACTGGGCTAGCCAGACCCTCTGATATCACTGAGGTCTGGGGGAGCCAGGGATGC	ENSG00000186350|RXRA|91
AGGCTAAGTTCAGCGCGGGAGCTGGCTTGGCCCTGACACTGAGAGGGAGGGGGACCGTCTGCCATTCTGTCCTGCCTGGAGTCCCTTTCCCGGCCAGGGCTGCTCTGGTGCTCCCTCAGT	ENSG00000186350|RXRA|92
TTACCCAGGGCAGGTGCTAGGCCCAAGGGACTGCACATGGAGGGCCGGGAGGCAGCAGGTGGATCCCTACCCACCCGAGGTGGTTTGGGACAGCCTAGAAAGAGGAAGTGCGTGAGTTCC	ENSG00000186350|RXRA|93
TTTCCTTTGTGCTTCCGAGCAACCTGGACCTGCAGAGTCATGGCCTGTGCTCCTCCAGCCTCTGGCCCAAGGGGCTCCTGCTCACACGCCTCGGTGCCTCCCCAGTGCTAGGGCACAAAG	ENSG00000186350|RXRA|94
CGAGGGTGCCCGACACTTCCTGCTTGTGGATGCCTTTGCTGCCCCTGCTCTGACCTGATCCCCGCCCTGGCTGTACCTACTTCTTTCCTTTTTTCAAACAAGCCCTTTGCTTCCCCACCT	ENSG00000186350|RXRA|95
CTGAACACTGGCTTGGGGGCCCCTGTGCCTGGGACACCCCTTTCTTCCTCCCAGGCCCTGGCCCATCTCCTCCAGGAAGCTTGAGTGCTCACTGCAGCCACCGGCCTCCCTGTAAGACAG	ENSG00000186350|RXRA|96
TAAGACAGTGAGTTGTCTGCGAGCTCTGCTCTGAGCCCTGGCACATGGAGCGACTCAGTTACACTTAATCAGCTCTTAGAGGCACTGGCTGGGCATGGTGGCTCAACGCCTGTAATCCCA	ENSG00000186350|RXRA|97
GCCGAGGCGGGAGGATTGCTTGAGCCTAGGAGTTGGAGACAAGCCTGGGCAACATAGTTGAGACCCCACCACTAGAAAAAAAAAAAATAGCTGAGTGCAGTGGCATGGACTTGTAATCCC	ENSG00000186350|RXRA|98
ATTGGGCCTGGAAGTTTGAGGCTGCAGTGACTGTGATTGTGCCACTGTCCTCCAGCCTGGGCAACAGAGTGAGACCC	ENSG00000186350|RXRA|99
CTGAGCCTGCGCCCAGTGCCCCGAGCCCCGCGCCGAGCCGAGTCCGCGCCAAGCAGCAGCCGCCCACCCCGGGGCCCGGCCGGGGGACCAGCAGCTTCCCCACAGGCAACGTGAGGAGAG	ENSG00000183873|SCN5A|1
AGAGCCTGTGCCCAGAAGCAGGATGAGAAGATGGCAAACTTCCTATTACCTCGGGGCACCAGCAGCTTCCGCAGGTTCACACGGGAGTCCCTGGCAGCCATCGAGAAGCGCATGGCAGAG	ENSG00000183873|SCN5A|2
AAGCAAGCCCGCGGCTCAACCACCTTGCAGGAGAGCCGAGAGGGGCTGCCCGAGGAGGAGGCTCCCCGGCCCCAGCTGGACCTGCAGGCCTCCAAAAAGCTGCCAGATCTCTATGGCAAT	ENSG00000183873|SCN5A|3
CCACCCCAAGAGCTCATCGGAGAGCCCCTGGAGGACCTGGACCCCTTCTATAGCACCCAAAAGACTTTCATCGTACTGAATAAAGGCAAGACCATCTTCCGGTTCAGTGCCACCAACGCC	ENSG00000183873|SCN5A|4
TTGTATGTCCTCAGTCCCTTCCACCCCATCCGGAGAGCGGCTGTGAAGATTCTGGTTCACTCGCTCTTCAACATGCTCATCATGTGCACCATCCTCACCAACTGCGTGTTCATGGCCCAG	ENSG00000183873|SCN5A|5
CACGACCCTCCACCCTGGACCAAGTATGTCGAGTACACCTTCACCGCCATTTACACCTTTGAGTCTCTGGTCAAGATTCTGGCTCGAGGCTTCTGCCTGCACGCGTTCACTTTCCTTCGG	ENSG00000183873|SCN5A|6
GACCCATGGAACTGGCTGGACTTTAGTGTGATTATCATGGCATACACAACTGAATTTGTGGACCTGGGCAATGTCTCAGCCTTACGCACCTTCCGAGTCCTCCGGGCCCTGAAAACTATA	ENSG00000183873|SCN5A|7
TCAGTCATTTCAGGGCTGAAGACCATCGTGGGGGCCCTGATCCAGTCTGTGAAGAAGCTGGCTGATGTGATGGTCCTCACAGTCTTCTGCCTCAGCGTCTTTGCCCTCATCGGCCTGCAG	ENSG00000183873|SCN5A|8
CTCTTCATGGGCAACCTAAGGCACAAGTGCGTGCGCAACTTCACAGCGCTCAACGGCACCAACGGCTCCGTGGAGGCCGACGGCTTGGTCTGGGAATCCCTGGACCTTTACCTCAGTGAT	ENSG00000183873|SCN5A|9
CCAGAAAATTACCTGCTCAAGAACGGCACCTCTGATGTGTTACTGTGTGGGAACAGCTCTGACGCTGGGACATGTCCGGAGGGCTACCGGTGCCTAAAGGCAGGCGAGAACCCCGACCAC	ENSG00000183873|SCN5A|10
GGCTACACCAGCTTCGATTCCTTTGCCTGGGCCTTTCTTGCACTCTTCCGCCTGATGACGCAGGACTGCTGGGAGCGCCTCTATCAGCAGACCCTCAGGTCCGCAGGGAAGATCTACATG	ENSG00000183873|SCN5A|11
ATCTTCTTCATGCTTGTCATCTTCCTGGGGTCCTTCTACCTGGTGAACCTGATCCTGGCCGTGGTCGCAATGGCCTATGAGGAGCAAAACCAAGCCACCATCGCTGAGACCGAGGAGAAG	ENSG00000183873|SCN5A|12
GAAAAGCGCTTCCAGGAGGCCATGGAAATGCTCAAGAAAGAACACGAGGCCCTCACCATCAGGGGTGTGGATACCGTGTCCCGTAGCTCCTTGGAGATGTCCCCTTTGGCCCCAGTAAAC	ENSG00000183873|SCN5A|13
AGCCATGAGAGAAGAAGCAAGAGGAGAAAACGGATGTCTTCAGGAACTGAGGAGTGTGGGGAGGACAGGCTCCCCAAGTCTGACTCAGAAGATGGTCCCAGAGCAATGAATCATCTCAGC	ENSG00000183873|SCN5A|14
CTCACCCGTGGCCTCAGCAGGACTTCTATGAAGCCACGTTCCAGCCGCGGGAGCATTTTCACCTTTCGCAGGCGAGACCTGGGTTCTGAAGCAGATTTTGCAGATGATGAAAACAGCACA	ENSG00000183873|SCN5A|15
GCGGGGGAGAGCGAGAGCCACCACACATCACTGCTGGTGCCCTGGCCCCTGCGCCGGACCAGTGCCCAGGGACAGCCCAGTCCCGGAACCTCGGCTCCTGGCCACGCCCTCCATGGCAAA	ENSG00000183873|SCN5A|16
AAGAACAGCACTGTGGACTGCAATGGGGTGGTCTCATTACTGGGGGCAGGCGACCCAGAGGCCACATCCCCAGGAAGCCACCTCCTCCGCCCTGTGATGCTAGAGCACCCGCCAGACACG	ENSG00000183873|SCN5A|17
ACCACGCCATCGGAGGAGCCAGGCGGGCCCCAGATGCTGACCTCCCAGGCTCCGTGTGTAGATGGCTTCGAGGAGCCAGGAGCACGGCAGCGGGCCCTCAGCGCAGTCAGCGTCCTCACC	ENSG00000183873|SCN5A|18
AGCGCACTGGAAGAGTTAGAGGAGTCTCGCCACAAGTGTCCACCATGCTGGAACCGTCTCGCCCAGCGCTACCTGATCTGGGAGTGCTGCCCGCTGTGGATGTCCATCAAGCAGGGAGTG	ENSG00000183873|SCN5A|19
AAGTTGGTGGTCATGGACCCGTTTACTGACCTCACCATCACTATGTGCATCGTACTCAACACACTCTTCATGGCGCTGGAGCACTACAACATGACAAGTGAATTCGAGGAGATGCTGCAG	ENSG00000183873|SCN5A|20
GTCGGAAACCTGGTCTTCACAGGGATTTTCACAGCAGAGATGACCTTCAAGATCATTGCCCTCGACCCCTACTACTACTTCCAACAGGGCTGGAACATCTTCGACAGCATCATCGTCATC	ENSG00000183873|SCN5A|21
CTTAGCCTCATGGAGCTGGGCCTGTCCCGCATGAGCAACTTGTCGGTGCTGCGCTCCTTCCGCCTGCTGCGGGTCTTCAAGCTGGCCAAATCATGGCCCACCCTGAACACACTCATCAAG	ENSG00000183873|SCN5A|22
ATCATCGGGAACTCAGTGGGGGCACTGGGGAACCTGACACTGGTGCTAGCCATCATCGTGTTCATCTTTGCTGTGGTGGGCATGCAGCTCTTTGGCAAGAACTACTCGGAGCTGAGGGAC	ENSG00000183873|SCN5A|23
AGCGACTCAGGCCTGCTGCCTCGCTGGCACATGATGGACTTCTTTCATGCCTTCCTCATCATCTTCCGCATCCTCTGTGGAGAGTGGATCGAGACCATGTGGGACTGCATGGAGGTGTCG	ENSG00000183873|SCN5A|24
GGGCAGTCATTATGCCTGCTGGTCTTCTTGCTTGTTATGGTCATTGGCAACCTTGTGGTCCTGAATCTCTTCCTGGCCTTGCTGCTCAGCTCCTTCAGTGCAGACAACCTCACAGCCCCT	ENSG00000183873|SCN5A|25
GATGAGGACAGAGAGATGAACAACCTCCAGCTGGCCCTGGCCCGCATCCAGAGGGGCCTGCGCTTTGTCAAGCGGACCACCTGGGATTTCTGCTGTGGTCTCCTGCGGCAGCGGCCTCAG	ENSG00000183873|SCN5A|26
AAGCCCGCAGCCCTTGCCGCCCAGGGCCAGCTGCCCAGCTGCATTGCCACCCCCTACTCCCCGCCACCCCCAGAGACGGAGAAGGTGCCTCCCACCCGCAAGGAAACACGGTTTGAGGAA	ENSG00000183873|SCN5A|27
GGCGAGCAACCAGGCCAGGGCACCCCCGGGGATCCAGAGCCCGTGTGTGTGCCCATCGCTGTGGCCGAGTCAGACACAGATGACCAAGAAGAAGATGAGGAGAACAGCCTGGGCACGGAG	ENSG00000183873|SCN5A|28
GAGGAGTCCAGCAAGCAGCAGGAATCCCAGCCTGTGTCCGGTGGCCCAGAGGCCCCTCCGGATTCCAGGACCTGGAGCCAGGTGTCAGCGACTGCCTCCTCTGAGGCCGAGGCCAGTGCA	ENSG00000183873|SCN5A|29
TCTCAGGCCGACTGGCGGCAGCAGTGGAAAGCGGAACCCCAGGCCCCAGGGTGCGGTGAGACCCCAGAGGACAGTTGCTCCGAGGGCAGCACAGCAGACATGACCAACACCGCTGAGCTC	ENSG00000183873|SCN5A|30
CTGGAGCAGATCCCTGACCTCGGCCAGGATGTCAAGGACCCAGAGGACTGCTTCACTGAAGGCTGTGTCCGGCGCTGTCCCTGCTGTGCGGTGGACACCACACAGGCCCCAGGGAAGGTC	ENSG00000183873|SCN5A|31
TGGTGGCGGTTGCGCAAGACCTGCTACCACATCGTGGAGCACAGCTGGTTCGAGACATTCATCATCTTCATGATCCTACTCAGCAGTGGAGCGCTGGCCTTCGAGGACATCTACCTAGAG	ENSG00000183873|SCN5A|32
GAGCGGAAGACCATCAAGGTTCTGCTTGAGTATGCCGACAAGATGTTCACATATGTCTTCGTGCTGGAGATGCTGCTCAAGTGGGTGGCCTACGGCTTCAAGAAGTACTTCACCAATGCC	ENSG00000183873|SCN5A|33
TGGTGCTGGCTCGACTTCCTCATCGTAGACGTCTCTCTGGTCAGCCTGGTGGCCAACACCCTGGGCTTTGCCGAGATGGGCCCCATCAAGTCACTGCGGACGCTGCGTGCACTCCGTCCT	ENSG00000183873|SCN5A|34
CTGAGAGCTCTGTCACGATTTGAGGGCATGAGGGTGGTGGTCAATGCCCTGGTGGGCGCCATCCCGTCCATCATGAACGTCCTCCTCGTCTGCCTCATCTTCTGGCTCATCTTCAGCATC	ENSG00000183873|SCN5A|35
AGACTTGCCTTTGAACTACACCATCGTGAACAACAAGAGCCAGTGTGAGTCCTTGAACTTGACCGGAGAATTGTACTGGACCAAGGTGAAAGTCAACTTTGACAACGTGGGGGCCGGGTA	ENSG00000183873|SCN5A|36
CCTGGCCCTTCTGCAGGTGGCAACATTTAAAGGCTGGATGGACATTATGTATGCAGCTGTGGACTCCAGGGGGTATGAAGAGCAGCCTCAGTGGGAATACAACCTCTACATGTACATCTA	ENSG00000183873|SCN5A|37
TTTTGTCATTTTCATCATCTTTGGGTCTTTCTTCACCCTGAACCTCTTTATTGGTGTCATCATTGACAACTTCAACCAACAGAAGAAAAAGTTAGGGGGCCAGGACATCTTCATGACAGA	ENSG00000183873|SCN5A|38
GGAGCAGAAGAAGTACTACAATGCCATGAAGAAGCTGGGCTCCAAGAAGCCCCAGAAGCCCATCCCACGGCCCCTGAACAAGTACCAGGGCTTCATATTCGACATTGTGACCAAGCAGGC	ENSG00000183873|SCN5A|39
CTTTGACGTCACCATCATGTTTCTGATCTGCTTGAATATGGTGACCATGATGGTGGAGACAGATGACCAAAGTCCTGAGAAAATCAACATCTTGGCCAAGATCAACCTGCTCTTTGTGGC	ENSG00000183873|SCN5A|40
CATCTTCACAGGCGAGTGTATTGTCAAGCTGGCTGCCCTGCGCCACTACTACTTCACCAACAGCTGGAATATCTTCGACTTCGTGGTTGTCATCCTCTCCATCGTGGGCACTGTGCTCTC	ENSG00000183873|SCN5A|41
GGACATCATCCAGAAGTACTTCTTCTCCCCGACGCTCTTCCGAGTCATCCGCCTGGCCCGAATAGGCCGCATCCTCAGACTGATCCGAGGGGCCAAGGGGATCCGCACGCTGCTCTTTGC	ENSG00000183873|SCN5A|42
CCTCATGATGTCCCTGCCTGCCCTCTTCAACATCGGGCTGCTGCTCTTCCTCGTCATGTTCATCTACTCCATCTTTGGCATGGCCAACTTCGCTTATGTCAAGTGGGAGGCTGGCATCGA	ENSG00000183873|SCN5A|43
CGACATGTTCAACTTCCAGACCTTCGCCAACAGCATGCTGTGCCTCTTCCAGATCACCACGTCGGCCGGCTGGGATGGCCTCCTCAGCCCCATCCTCAACACTGGGCCGCCCTACTGCGA	ENSG00000183873|SCN5A|44
CCCCACTCTGCCCAACAGCAATGGCTCTCGGGGGGACTGCGGGAGCCCAGCCGTGGGCATCCTCTTCTTCACCACCTACATCATCATCTCCTTCCTCATCGTGGTCAACATGTACATTGC	ENSG00000183873|SCN5A|45
CATCATCCTGGAGAACTTCAGCGTGGCCACGGAGGAGAGCACCGAGCCCCTGAGTGAGGACGACTTCGATATGTTCTATGAGATCTGGGAGAAATTTGACCCAGAGGCCACTCAGTTTAT	ENSG00000183873|SCN5A|46
TGAGTATTCGGTCCTGTCTGACTTTGCCGATGCCCTGTCTGAGCCACTCCGTATCGCCAAGCCCAACCAGATAAGCCTCATCAACATGGACCTGCCCATGGTGAGTGGGGACCGCATCCA	ENSG00000183873|SCN5A|47
TTGCATGGACATTCTCTTTGCCTTCACCAAAAGGGTCCTGGGGGAGTCTGGGGAGATGGACGCCCTGAAGATCCAGATGGAGGAGAAGTTCATGGCAGCCAACCCATCCAAGATCTCCTA	ENSG00000183873|SCN5A|48
CGAGCCCATCACCACCACACTCCGGCGCAAGCACGAAGAGGTGTCGGCCATGGTTATCCAGAGAGCCTTCCGCAGGCACCTGCTGCAACGCTCTTTGAAGCATGCCTCCTTCCTCTTCCG	ENSG00000183873|SCN5A|49
TCAGCAGGCGGGCAGCGGCCTCTCCGAAGAGGATGCCCCTGAGCGAGAGGGCCTCATCGCCTACGTGATGAGTGAGAACTTCTCCCGACCCCTTGGCCCACCCTCCAGCTCCTCCATCTC	ENSG00000183873|SCN5A|50
CTCCACTTCCTTCCCACCCTCCTATGACAGTGTCACTAGAGCCACCAGCGATAACCTCCAGGTGCGGGGGTCTGACTACAGCCACAGTGAAGATCTCGCCGACTTCCCCCCTTCTCCGGA	ENSG00000183873|SCN5A|51
CAGGGACCGTGAGTCCATCGTGTGAGCCTCGGCCTGGCTGGCCAGGACACACTGAAAAGCAGCCTTTTTCACCATGGCAAACCTAAATGCAGTCAGTCACAAACCAGCCTGGGGCCTTCC	ENSG00000183873|SCN5A|52
TGGCTTTGGGAGTAAGAAATGGGCCTCAGCCCCGCGGATCAACCAGGCAGAGTTCTGTGGCGCCGCGTGGACAGCCGGAGCAGTTGGCCTGTGCTTGGAGGCCTCAGATAGACCTGTGAC	ENSG00000183873|SCN5A|53
CTGGTCTGGTCAGGCAATGCCCTGCGGCTCTGGAAAGCAACTTCATCCCAGCTGCTGAGGCGAAATATAAAACTGAGACTGTATATGTTGTGAATGGGCTTTCATAAATTTATTATATTT	ENSG00000183873|SCN5A|54
GATATTTTTTTACTTGAGCAAAGAACTAAGGATTTTTCCATGGACATGGGCAGCAATTCACGCTGTCTCTTCTTAACCCTGAACAAGAGTGTCTATGGAGCAGCCGGAAGTCTGTTCTCA	ENSG00000183873|SCN5A|55
AAGCAGAAGTGGAATCCAGTGTGGCTCCCACAGGTCTTCACTGCCCAGGGGTCGAATGGGGTCCCCCTCCCACTTGACCTGAGATGCTGGGAGGGCTGAACCCCCACTCACACAAGCACA	ENSG00000183873|SCN5A|56
CACACACAGTCCTCACACACGGAGGCCAGACACAGGCCGTGGGACCCAGGCTCCCAGCCTAAGGGAGACAGGCCTTTCCCTGCCGGCCCCCCAAGGATGGGGTTCTTGTCCACGGGGCTC	ENSG00000183873|SCN5A|57
ACTCTGGCCCCCTATTGTCTCCAAGGTCCCATTTTCCCCCTGTGTTTTCACGCAGGTCATATTGTCAGTCCTACAAAAATAAAAGGCTTCCAGAGGAGAGTGGCCTGGGTCCCAGGGCTG	ENSG00000183873|SCN5A|58
GCCCTAGGCACTGATAGTTGCCTTTTCTTCCCCTCCTGTAAGAGTATTAACAAAACCAAAGGACACAAGGGTGCAAGCCCCATTCACGGCCTGGCATGCAGCTTGTCCTTGCTCCTGGAA	ENSG00000183873|SCN5A|59
CCTGGCAGGCCCTGCCCAGCCAGCCATCGGAAGAGAGGGCTGAGCCATGGGGGTTTGGGGCTAAGAAGTTCACCAGCCCTGAGCCATGGCGGCCCCTCAGCCTGCCTGAAGAGAGGAAAC	ENSG00000183873|SCN5A|60
TGGCGATCTCCCAGGGCTCTCTGGACCATACGCGGAGGAGTTTTCTGTGTGGTCTCCAGCTCCTCTCCAGACACAGAGACATGGGAGTGGGGAGCGGAGCTTGGCCCTGCGCCCTGTGCA	ENSG00000183873|SCN5A|61
GGGAAAGGGATGGTCAGGCCCAGTTCTCGTGCCCTTAGAGGGGAATGAACCATGGCACCTTTGAGAGAGGGGGCACTGTGGTCAGGCCCAGCCTCTCTGGCTCAGCCCGGGATCCTGATG	ENSG00000183873|SCN5A|62
GCACCCACACAGAGGACCTCTTTGGGGCAAGATCCAGGTGGTCCCATAGGTCTTGTGAAAAGGCTTTTTCAGGGAAAAATATTTTACTAGTCCAATCACCCCCAGGACCTCTTCAGCTGC	ENSG00000183873|SCN5A|63
TGACAATCCTATTTAGCATATGCAAATCTTTTAACATAGAGAACTGTCACCCTGAGGTAACAGGGTCAACTGGCGAAGCCTGAGCAGGCAGGGGCTTGGCTGCCCCATTCCAGCTCTCCC	ENSG00000183873|SCN5A|64
ATGGAGCCCCTCCACCGGGCGCATGCCTCCCAGGCCACCTCAGTCTCACCTGCCGGCTCTGGGCTGGCTGCTCCTAACCTACCTCGCCGAGCTGTCGGAGGGCTGGACATTTGTGGCAGT	ENSG00000183873|SCN5A|65
GCTGAAGGGGGCATTGCCGGCGAGTAAAGTATTATGTTTCTTCTTGTCACCCCAGTTCCCTTGGTGGCAACCCCAGACCCAACCCATGCCCCTGACAGATCTAGTTCTCTTCTCCTGTGT	ENSG00000183873|SCN5A|66
TCCCTTTGAGTCCAGTGTGGGACACGGTTTAACTGTCCCAGCGACATTTCTCCAAGTGGAAATCCTATTTTTGTAGATCTCCATGCTTTGCTCTCAAGGCTTGGAGAGGTATGTGCCCCT	ENSG00000183873|SCN5A|67
CCTGGGTGCTCACCGCCTGCTACACAGGCAGGAATGCGGTTGGGAGGCAGGTCGGGCTGCCAGCCCAGCTGGCCGGAAGGAGACTGTGGTTTTTGTGTGTGTGGACAGCCCGGGAGCTTT	ENSG00000183873|SCN5A|68
GAGACAGGTGCCTGGGGCTGGCTGCAGACGGTGTGGTTGGGGGTGGGAGGTGAGCTAGACCCAACCCTTAGCTTTTAGCCTGGCTGTCACCTTTTTAATTTCCAGAACTGCACAATGACC	ENSG00000183873|SCN5A|69
AGCAGGAGGGAAGGACAGACATCAAGTGCCAGATGTTGTCTGAACTAATCGAGCACTTCTCACCAAACTTCATGTATAAATAAAATACATATTTTTAAAACAAACCAATAAATGGCTTAC	ENSG00000183873|SCN5A|70
ATGGAACTGGCTGGACTTTAGTGTGATTATCATGGCGTATGTATCAGAAAATATAAAACTAGGCAATTTGTCGGCTCTTCGAACTTTCAGAGTCCTGAGAGCTCTAAAAACTATTTCAGT	ENSG00000183873|SCN5A|71
CTGATTCCCTGCTGGTCCTAAGACAAATGCATGGTCATGACCTGGGAGCTGGTTGGAAATGAAGAACCTCTGACCCTCCTCCAGACCTGCCAAGTCAGCACCTGCATTTTCATTTGATCC	ENSG00000183873|SCN5A|72
CCAGGGGATTCTTGGGCACATGAAAGTTTGAGAAACCCTCTTCTGATTCTTCAGAACATTCTAGAAGCTAAGCTACTGAGGATCCCAGAAGAAATGACGTCTGTCGGGCTCTGATATTGG	ENSG00000183873|SCN5A|73
CTCCAAATATCCCTCCCCACCACACCCCCTTGGTCCGTCCTCCTCCCCACCCACTTGCAGGGACCTTCAAGCAGGTCACCAGAACTTAGCCAAGGAAAAACCATTTCCCAATAAAGAGGC	ENSG00000183873|SCN5A|74
GGACTTTAGTGTGATTATCATGGCTGCCTCTGTCTTGGGAACTCTGTTTTTTCCAATGAGTATTCAGGCCACCTCCACCTCATGATTTCAAGGACTTCTGAGCCAGGCACAAGCTGATCA	ENSG00000183873|SCN5A|75
ACAGATCACAGAAGATGTGAACCAAAACTAGGACCAGAAATGCACTTGCTTCCTGTATCACCTGACCTGAGCCTCCTGGAAAACAGGCTTCTCTCTTCACTCTGATGTGTCCCCAGCCCC	ENSG00000183873|SCN5A|76
AGACTCCACATGTGGTTTCATGTCATGGGTCCCAGTGGTGTGGCGAGAGTGGCAGAGTGGTTGCCTTCTAGCACCAGTTATCCTTAGCACCATCACCAAGAGAGCCACCGGGAAGCTTGC	ENSG00000183873|SCN5A|77
TGTGTGGACATCCTTACGGCACTCAAGCCGAAGTCCTATGTTAGGAGGGTTGAAATCCAGAAGAAAACCTGAGGGAGGCCCTGGGCTATCCACAGCACTGCCCCCACCCCCGTGGGAGGG	ENSG00000183873|SCN5A|78
GGCCAAGGGAGAGGGCTGGTCGGGGAGGGCAGGCGGTGGTTCTGCTTTGTAATTCCCAATAACTGTGGTTTGATTCTGCAGGTATGTATCAGAAAATATAAAACTAGGCAATTTGTCGGC	ENSG00000183873|SCN5A|79
GGACATCTTTCCATGTGCATGTTGGTCATTTATATATCTTCCTTGGAGAAATCTCTATTCAGATCCTTAGCTCATTTTTAATTGGGTTATTTCTCTTTTTCTTGTTGAGTTGTAAGAGTT	ENSG00000183873|SCN5A|80
CTTTACATATTCTGGATCATAGTCTCTTATCAGATATATGATTTAAAAATATTTTCTCCTAGTCTGTGAGTTTTTTCATTTCCTAGTGGTGTCCATTAAAGCACAAAAGTTTTACATGTT	ENSG00000183873|SCN5A|81
ATGCTCAGTGGCTTCTCGACAAGTTGGCAGCAACAACACGGCCCTGGTCGTCGTCGCCGCTGCGGTAACGGAGCGGTTTGGGTGGCGGAGCCTGCGTTCGCGCCTTCCCGCTCTCCTCGG	ENSG00000141646|SMAD4|1
CGCCTTCCCGCTCTCCTCGGGAGGCCCTTCCTGCTCTCCCCTAGGCTCCGCGGCCGCCCAGGGGGTGGGAGCGGGTGAGGGGAGCCAGGCGCCCAGCGAGAGAGGCCCCCCGCCGCAGGG	ENSG00000141646|SMAD4|2
CGGCCTGGCCGGGACGCCTCGGGGCGGGGGCCGAGGAGCTCTCCGGGCCGCCGGGGAAAGCTACGGGCCCGGTGCGTCCG	ENSG00000141646|SMAD4|3
CGGACCAGCAGCGCGGGAGAGCGGACTCCCCTCGCCACCGCCCGAGCCCAGGTTATCCTGAATACATGTCTAACAATTTTCCTTGCAACGTTAGCTGTTGTTTTTCACTGTTTCCAAAGG	ENSG00000141646|SMAD4|4
ATCAAAATTGCTTCAGAAATTGGAGACATATTTGATTTAAAAGGAAAAACTTGAACAAATGGACAATATGTCTATTACGAATACACCAACAAGTAATGATGCCTGTCTGAGCATTGTGCA	ENSG00000141646|SMAD4|5
TAGTTTGATGTGCCATAGACAAGGTGGAGAGAGTGAAACATTTGCAAAAAGAGCAATTGAAAGTTTGGTAAAGAAGCTGAAGGAGAAAAAAGATGAATTGGATTCTTTAATAACAGCTAT	ENSG00000141646|SMAD4|6
AACTACAAATGGAGCTCATCCTAGTAAATGTGTTACCATACAGAGAACATTGGATGGGAGGCTTCAGGTGGCTGGTCGGAAAGGATTTCCTCATGTGATCTATGCCCGTCTCTGGAGGTG	ENSG00000141646|SMAD4|7
GCCTGATCTTCACAAAAATGAACTAAAACATGTTAAATATTGTCAGTATGCGTTTGACTTAAAATGTGATAGTGTCTGTGTGAATCCATATCACTACGAACGAGTTGTATCACCTGGAAT	ENSG00000141646|SMAD4|8
TGATCTCTCAGGATTAACACTGCAGAGTAATGCTCCATCAAGTATGATGGTGAAGGATGAATATGTGCATGACTTTGAGGGACAGCCATCGTTGTCCACTGAAGGACATTCAATTCAAAC	ENSG00000141646|SMAD4|9
CATCCAGCATCCACCAAGTAATCGTGCATCGACAGAGACATACAGCACCCCAGCTCTGTTAGCCCCATCTGAGTCTAATGCTACCAGCACTGCCAACTTTCCCAACATTCCTGTGGCTTC	ENSG00000141646|SMAD4|10
CACAAGTCAGCCTGCCAGTATACTGGGGGGCAGCCATAGTGAAGGACTGTTGCAGATAGCATCAGGGCCTCAGCCAGGACAGCAGCAGAATGGATTTACTGGTCAGCCAGCTACTTACCA	ENSG00000141646|SMAD4|11
TCATAACAGCACTACCACCTGGACTGGAAGTAGGACTGCACCATACACACCTAATTTGCCTCACCACCAAAACGGCCATCTTCAGCACCACCCGCCTATGCCGCCCCATCCCGGACATTA	ENSG00000141646|SMAD4|12
CTGGCCTGTTCACAATGAGCTTGCATTCCAGCCTCCCATTTCCAATCATCCTGCTCCTGAGTATTGGTGTTCCATTGCTTACTTTGAAATGGATGTTCAGGTAGGAGAGACATTTAAGGT	ENSG00000141646|SMAD4|13
TCCTTCAAGCTGCCCTATTGTTACTGTTGATGGATACGTGGACCCTTCTGGAGGAGATCGCTTTTGTTTGGGTCAACTCTCCAATGTCCACAGGACAGAAGCCATTGAGAGAGCAAGGTT	ENSG00000141646|SMAD4|14
GCACATAGGCAAAGGTGTGCAGTTGGAATGTAAAGGTGAAGGTGATGTTTGGGTCAGGTGCCTTAGTGACCACGCGGTCTTTGTACAGAGTTACTACTTAGACAGAGAAGCTGGGCGTGC	ENSG00000141646|SMAD4|15
ACCTGGAGATGCTGTTCATAAGATCTACCCAAGTGCATATATAAAGGTCTTTGATTTGCGTCAGTGTCATCGACAGATGCAGCAGCAGGCGGCTACTGCACAAGCTGCAGCAGCTGCCCA	ENSG00000141646|SMAD4|16
GGCAGCAGCCGTGGCAGGAAACATCCCTGGCCCAGGATCAGTAGGTGGAATAGCTCCAGCTATCAGTCTGTCAGCTGCTGCTGGAATTGGTGTTGATGACCTTCGTCGCTTATGCATACT	ENSG00000141646|SMAD4|17
CAGGATGAGTTTTGTGAAAGGCTGGGGACCGGATTACCCAAGACAGAGCATCAAAGAAACACCTTGCTGGATTGAAATTCACTTACACCGGGCCCTCCAGCTCCTAGACGAAGTACTTCA	ENSG00000141646|SMAD4|18
TACCATGCCGATTGCAGACCCACAACCTTTAGACTGAGGTCTTTTACCGTTGGGGCCCTTAACCTTATCAGGATGGTGGACTACAAAATACAATCCTGTTTATAATCTGAAGATATATTT	ENSG00000141646|SMAD4|19
CACTTTTGTTCTGCTTTATCTTTTCATAAAGGGTTGAAAATGTGTTTGCTGCCTTGCTCCTAGCAGACAGAAACTGGATTAAAACAATTTTTTTTTTCCTCTTCAGAACTTGTCAGGCAT	ENSG00000141646|SMAD4|20
GGCTCAGAGCTTGAAGATTAGGAGAAACACATTCTTATTAATTCTTCACCTGTTATGTATGAAGGAATCATTCCAGTGCTAGAAAATTTAGCCCTTTAAAACGTCTTAGAGCCTTTTATC	ENSG00000141646|SMAD4|21
TGCAGAACATCGATATGTATATCATTCTACAGAATAATCCAGTATTGCTGATTTTAAAGGCAGAGAAGTTCTCAAAGTTAATTCACCTATGTTATTTTGTGTACAAGTTGTTATTGTTGA	ENSG00000141646|SMAD4|22
ACATACTTCAAAAATAATGTGCCATGTGGGTGAGTTAATTTTACCAAGAGTAACTTTACTCTGTGTTTAAAAAGTAAGTTAATAATGTATTGTAATCTTTCATCCAAAATATTTTTTGCA	ENSG00000141646|SMAD4|23
AGTTATATTAGTGAAGATGGTTTCAATTCAGATTGTCTTGCAACTTCAGTTTTATTTTTGCCAAGGCAAAAAACTCTTAATCTGTGTGTATATTGAGAATCCCTTAAAATTACCAGACAA	ENSG00000141646|SMAD4|24
AAAAATTTAAAATTACGTTTGTTATTCCTAGTGGATGACTGTTGATGAAGTATACTTTTCCCCTGTTAAACAGTAGTTGTATTCTTCTGTATTTCTAGGCACAAGGTTGGTTGCTAAGAA	ENSG00000141646|SMAD4|25
GCCTATAAGAGGAATTTCTTTTCCTTCATTCATAGGGAAAGGTTTTGTATTTTTTAAAACACTAAAAGCAGCGTCACTCTACCTAATGTCTCACTGTTCTGCAAAGGTGGCAATGCTTAA	ENSG00000141646|SMAD4|26
ACTAAATAATGAATAAACTGAATATTTTGGAAACTGCTAAATTCTATGTTAAATACTGTGCAGAATAATGGAAACATTACAGTTCATAATAGGTAGTTTGGATATTTTTGTACTTGATTT	ENSG00000141646|SMAD4|27
GATGTGACTTTTTTTGGTATAATGTTTAAATCATGTATGTTATGATATTGTTTAAAATTCAGTTTTTGTATCTTGGGGCAAGACTGCAAACTTTTTTATATCTTTTGGTTATTCTAAGCC	ENSG00000141646|SMAD4|28
CTTTGCCATCAATGATCATATCAATTGGCAGTGACTTTGTATAGAGAATTTAAGTAGAAAAGTTGCAGATGTATTGACTGTACCACAGACACAATATGTATGCTTTTTACCTAGCTGGTA	ENSG00000141646|SMAD4|29
GCATAAATAAAACTGAATCTCAACATACAAAGTTGAATTCTAGGTTTGATTTTTAAGATTTTTTTTTTCTTTTGCACTTTTGAGTCCAATCTCAGTGATGAGGTACCTTCTACTAAATGA	ENSG00000141646|SMAD4|30
CAGGCAACAGCCAGTTCTATTGGGCAGCTTTGTTTTTTTCCCTCACACTCTACCGGGACTTCCCCATGGACATTGTGTATCATGTGTAGAGTTGGTTTTTTTTTTTTTTAATTTTTATTT	ENSG00000141646|SMAD4|31
TACTATAGCAGAAATAGACCTGATTATCTACAAGATGATAAATAGATTGTCTACAGGATAAATAGTATGAAATAAAATCAAGGATTATCTTTCAGATGTGTTTACTTTTGCCTGGAGAAC	ENSG00000141646|SMAD4|32
TTTTAGCTATAGAAACACTTGTGTGATGATAGTCCTCCTTATATCACCTGGAATGAACACAGCTTCTACTGCCTTGCTCAGAAGGTCTTTTAAATAGACCATCCTAGAAACCACTGAGTT	ENSG00000141646|SMAD4|33
TGCTTATTTCTGTGATTTAAACATAGATCTTGATCCAAGCTACATGACTTTTGTCTTTAAATAACTTATCTACCACCTCATTTGTACTCTTGATTACTTACAAATTCTTTCAGTAAACAC	ENSG00000141646|SMAD4|34
CTAATTTTCTTCTGTAAAAGTTTGGTGATTTAAGTTTTATTGGCAGTTTTATAAAAAGACATCTTCTCTAGAAATTGCTAACTTTAGGTCCATTTTACTGTGAATGAGGAATAGGAGTGA	ENSG00000141646|SMAD4|35
GTTTTAGAATAACAGATTTTTAAAAATCCAGATGATTTGATTAAAACCTTAATCATACATTGACATAATTCATTGCTTCTTTTTTTTGAGATATGGAGTCTTGCTGTGTTGCCCAGGCAG	ENSG00000141646|SMAD4|36
CTCATTGTTCCCTTTTCTACTTTAAGGAAAGTTTTCATGTTTAATCATCTGGGGAAAGTATGTGAAAAATATTTGTTAAGAAGTATCTCTTTGGAGCCAAGCCACCTGTCTTGGTTTCTT	ENSG00000141646|SMAD4|37
TCTACTAAGAGCCATAAAGTATAGAAATACTTCTAGTTGTTAAGTGCTTATATTTGTACCTAGATTTAGTCACACGCTTTTGAGAAAACATCTAGTATGTTATGATCAGCTATTCCTGAG	ENSG00000141646|SMAD4|38
AGCTTGGTTGTTAATCTATATTTCTATTTCTTAGTGGTAGTCATCTTTGATGAATAAGACTAAAGATTCTCACAGGTTTAAAATTTTATGTCTACTTTAAGGGTAAAATTATGAGGTTAT	ENSG00000141646|SMAD4|39
GGTTCTGGGTGGGTTTTCTCTAGCTAATTCATATCTCAAAGAGTCTCAAAATGTTGAATTTCAGTGCAAGCTGAATGAGAGATGAGCCATGTACACCCACCGTAAGACCTCATTCCATGT	ENSG00000141646|SMAD4|40
TTGTCCAGTGCCTTTCAGTGCATTATCAAAGGGAATCCTTCATGGTGTTGCCTTTATTTTCCGGGGAGTAGATCGTGGGATATAGTCTATCTCATTTTTAATAGTTTACCGCCCCTGGTA	ENSG00000141646|SMAD4|41
TACAAAGATAATGACAATAAATCACTGCCATATAACCTTGCTTTTTCCAGAAACATGGCTGTTTTGTATTGCTGTAACCACTAAATAGGTTGCCTATACCATTCCTCCTGTGAACAGTGC	ENSG00000141646|SMAD4|42
AGATTTACAGGTTGCATGGTCTGGCTTAAGGAGAGCCATACTTGAGACATGTGAGTAAACTGAACTCATATTAGCTGTGCTGCATTTCAGACTTAAAATCCATTTTTGTGGGGCAGGGTG	ENSG00000141646|SMAD4|43
TGGTGTGTAAAGGGGGGTGTTTGTAATACAAGTTGAAGGCAAAATAAAATGTCCTGTCTCCCAGATGATATACATCTTATTATTTTTAAAGTTTATTGCTAATTGTAGGAAGGTGAGTTG	ENSG00000141646|SMAD4|44
CAGGTATCTTTGACTATGGTCATCTGGGGAAGGAAAATTTTACATTTTACTATTAATGCTCCTTAAGTGTCTATGGAGGTTAAAGAATAAAATGGTAAATGTTTCTGTGCCTGGTTTGAT	ENSG00000141646|SMAD4|45
GGTAACTGGTTAATAGTTACTCACCATTTTATGCAGAGTCACATTAGTTCACACCCTTTCTGAGAGCCTTTTGGGAGAAGCAGTTTTATTCTCTGAGTGGAACAGAGTTCTTTTTGTTGA	ENSG00000141646|SMAD4|46
TAATTTCTAGTTTGCTCCCTTCGTTATTGCCAACTTTACTGGCATTTTATTTAATGATAGCAGATTGGGAAAATGGCAAATTTAGGTTACGGAGGTAAATGAGTATATGAAAGCAATTAC	ENSG00000141646|SMAD4|47
CTCTAAAGCCAGTTAACAATTATTTTGTAGGTGGGGTACACTCAGCTTAAAGTAATGCATTTTTTTTTCCCGTAAAGGCAGAATCCATCTTGTTGCAGATAGCTATCTAAATAATCTCAT	ENSG00000141646|SMAD4|48
ATCCTCTTTTGCAAAGACTACAGAGAATAGGCTATGACAATCTTGTTCAAGCCTTTCCATTTTTTTCCCTGATAACTAAGTAATTTCTTTGAACATACCAAGAAGTATGTAAAAAGTCCA	ENSG00000141646|SMAD4|49
TGGCCTTATTCATCCACAAAGTGGCATCCTAGGCCCAGCCTTATCCCTAGCAGTTGTCCCAGTGCTGCTAGGTTGCTTATCTTGTTTATCTGGAATCACTGTGGAGTGAAATTTTCCACA	ENSG00000141646|SMAD4|50
TCATCCAGAATTGCCTTATTTAAGAAGTAAAACGTTTTAATTTTTAGCCTTTTTTTGGTGGAGTTATTTAATATGTATATCAGAGGATATACTAGATGGTAACATTTCTTTCTGTGCTTG	ENSG00000141646|SMAD4|51
GCTATCTTTGTGGACTTCAGGGGCTTCTAAAACAGACAGGACTGTGTTGCCTTTACTAAATGGTCTGAGACAGCTATGGTTTTGAATTTTTAGTTTTTTTTTTTTAACCCACTTCCCCTC	ENSG00000141646|SMAD4|52
CTGGTCTCTTCCCTCTCTGATAATTACCATTCATATGTGAGTGTTAGTGTGCCTCCTTTTAGCATTTTCTTCTTCTCTTTCTGATTCTTCATTTCTGACTGCCTAGGCAAGGAAACCAGA	ENSG00000141646|SMAD4|53
TAACCAAACTTACTAGAACGTTCTTTAAAACACAAGTACAAACTCTGGGACAGGACCCAAGACACTTTCCTGTGAAGTGCTGAAAAAGACCTCATTGTATTGGCATTTGATATCAGTTTG	ENSG00000141646|SMAD4|54
ATGTAGCTTAGAGTGCTTCCTGATTCTTGCTGAGTTTCAGGTAGTTGAGATAGAGAGAAGTGAGTCATATTCATATTTTCCCCCTTAGAATAATATTTTGAAAGGTTTCATTGCTTCCAC	ENSG00000141646|SMAD4|55
TTGAATGCTGCTCTTACAAAAACTGGGGTTACAAGGGTTACTAAATTAGCATCAGTAGCCAGAGGCAATACCGTTGTCTGGAGGACACCAGCAAACAACACACAACAAAGCAAAACAAAC	ENSG00000141646|SMAD4|56
CTTGGGAAACTAAGGCCATTTGTTTTGTTTTGGTGTCCCCTTTGAAGCCCTGCCTTCTGGCCTTACTCCTGTACAGATATTTTTGACCTATAGGTGCCTTTATGAGAATTGAGGGTCTGA	ENSG00000141646|SMAD4|57
TTGAGGGTCTGACATCCTGCCCCAAGGAGTAGCTAAAGTAATTGCTAGTGTTTTCAGGGATTTTAACATCAGACTGGAATGAATGAATGAAACTTTTTGTCCTTTTTTTTTCTGTTTTTT	ENSG00000141646|SMAD4|58
AGTAAGGACTAAGGAAAACCTTTGGTGAAGACAATCATTTCTCTCTGTTGATGTGGATACTTTTCACACCGTTTATTTAAATGCTTTCTCAATAGGTCCAGAGCCAGTGTTCTTGTTCAA	ENSG00000141646|SMAD4|59
CCTGAAAGTAATGGCTCTGGGTTGGGCCAGACAGTTGCACTCTCTAGTTTGCCCTCTGCCACAAATTTGATGTGTGACCTTTGGGCAAGTCATTTATCTTCTCTGGGCCTTAGTTGCCTC	ENSG00000141646|SMAD4|60
ATCTGTAAAATGAGGGAGTTGGAGTAGATTAATTATTCCAGCTCTGAAATTCTAAGTGACCTTGGCTACCTTGCAGCAGTTTTGGATTTCTTCCTTATCTTTGTTCTGCTGTTTGAGGGG	ENSG00000141646|SMAD4|61
GCTTTTTACTTATTTCCATGTTATTCAAAGGAGACTAGGCTTGATATTTTATTACTGTTCTTTTATGGACAAAAGGTTACATAGTATGCCCTTAAGACTTAATTTTAACCAAAGGCCTAG	ENSG00000141646|SMAD4|62
ATAGTATGCCCTTAAGACTTAATTTTAACCAAAGGCCTAGCACCACCTTAGGGGCTGCAATAAACACTTAACGCGCG	ENSG00000141646|SMAD4|63
AGCTTTTGAATTGCGTGCACACACACACGCACGCACACACTCTGGTCAGAGTTTATTAAGGCTTTCGAGTCATGACATTATAGCTTTTGAGTTGGTGTGTGTGACACCACCCTCCTAAGT	ENSG00000141646|SMAD4|64
GGTGTGTGCTTGTAATTTTTTTTTTCAGTGAAAATGGATTGAAAACCTGTTGTTAATGCTTAGTGATATTATGCTCAAAACAAGGAAATTCCCTTGAACCGTGTCAATTAAACTGGTTTA	ENSG00000141646|SMAD4|65
TATGACTCAAGAAAACAATACCAGTAGATGATTATTAACTTTATTCTTGGCTCTTTTTAGGTCCATTTTGATTAAGTGACTTTTGGCTGGATCATTCAGAGCTCTCTTCTAGCCTACCCT	ENSG00000141646|SMAD4|66
TGGATGAGTACAATTAATGAAATTCATATTTTCAAGGACCTGGGAGCCTTCCTTGGGGCTGGGTTGAGGGTGGGGGGTTGGGGAGTCCTGGTAGAGGCCAGCTTTGTGGTAGCTGGAGAG	ENSG00000141646|SMAD4|67
GAAGGGATGAAACCAGCTGCTGTTGCAAAGGCTGCTTGTCATTGATAGAAGGACTCACGGGCTTGGATTGATTAAGACTAAACATGGAGTTGGCAAACTTTCTTCAAGTATTGAGTTCTG	ENSG00000141646|SMAD4|68
TTCAATGCATTGGACATGTGATTTAAGGGAAAAGTGTGAATGCTTATAGATGATGAAAACCTGGTGGGCTGCAGAGCCCAGTTTAGAAGAAGTGAGTTGGGGGTTGGGGACAGATTTGGT	ENSG00000141646|SMAD4|69
GGTGGTATTTCCCAACTGTTTCCTCCCCTAAATTCAGAGGAATGCAGCTATGCCAGAAGCCAGAGAAGAGCCACTCGTAGCTTCTGCTTTGGGGACAACTGGTCAGTTGAAAGTCCCAGG	ENSG00000141646|SMAD4|70
AGTTCCTTTGTGGCTTTCTGTATACTTTTGCCTGGTTAAAGTCTGTGGCTAAAAAATAGTCGAACCTTTCTTGAGAACTCTGTAACAAAGTATGTTTTTGATTAAAAGAGAAAGCCAACT	ENSG00000141646|SMAD4|71
AACAAAATCCACTCACACTTGCAACGCCTGGCAAGGCTCTTCAATATGTGATTCCTTGACTGTCCTGTGCGTCTCTCGAGTGTAAACACCTCTGGGGCTCGTGATTCGGGGCTGCCAGAA	ENSG00000141646|SMAD4|72
TTCTCCTGCCTCAGCCTCCCTCTTTTGTAGTTTTAGTAGAGACGGGGTTTTGCCTGTTGGCCAGGCTGGTCTTGAACTC	ENSG00000141646|SMAD4|73
AAACCAGTGTCTTGCTGAGACTCTTCCCGTTGCTGGCTTCGAAGAGGCAAGCTGCCATATTGTTAGCTTCCCTATGGAGAGCACCACATGGCAAGGAACAGAGGGGGTCTCCAGCCAACA	ENSG00000141646|SMAD4|74
GCCTGCAAAGGACTAAGGCCCTCAGTCCTGTAGCCTGCAAGGAACTGAATGGTGCCAACAACCACATGAACTTGGAAGCAGATCCTTTGTTCCAGCCTCACTTTGTAGAGGACCCAGCTA	ENSG00000141646|SMAD4|75
GTTTGTCTCAGTGGGTATTAAAGGTTGGGAGACTGCAATGATAAGTGTGTCTGAATCTCTCTATGGGGCTGTTTGTGAGGGGGTTCAAATTCTGAGTGCTCATCACACACCTCCCCTATT	ENSG00000141646|SMAD4|76
GGTGGTTTTGTAAAGGCTGTCTTCAGTGTCTTATTTCCTCAGAAAACAACTGGTATTTCTCACAGCTCCTTCTAGATTTGGACAAAGGAATGATACAAGAGCAGCTCCATCAAGTATGAT	ENSG00000141646|SMAD4|77
GGATGATGACATTTTTGAATTGGTAAAATCTGTTCTTCTGTAATAGTTGCTTTTTGCCTATGACCCTGTTTGCATTCTTTTTGTATCAAAAATGGAGTATGGGATGAAGGAGAAAGGGGA	ENSG00000141646|SMAD4|78
TGATTATTATATTATACTGTTCTATCTCCTCCTTTTTTGTTGATGCTTATTATAATTCTGCCTCACCAGCCAGGGTGGGTTGTAATCACTGAAGTGCTTGGCTTTATTCTAGTAAGGAAA	ENSG00000141646|SMAD4|79
TAGGTAATCTGTTTCTTACTACTTTCTCTTTGTTTTGTCCTATCCTCTCTGTTTTTTTGTTGACCTAGAATTAGTTTGTGTGAGCGGCAGGCAGTAACATTAACAAGAAAATAACTTACT	ENSG00000141646|SMAD4|80
GCTTTGGAAATGTAGATTTTGAGGTTAGGGGCATTTAAAACTGGATTTAAAACTGGATTTAAATTGGCTATTGCTCTTTGTATTTGAACTGCAATTTATGAACTAAAGTACTGTAAAAAA	ENSG00000141646|SMAD4|81
AAATATGTGCATCATTATTAGATATGAACAGGAAAAGAAAAAAGGAAATATACAAAAATGTTAATAGCTATCTTTTGGTTTTATGTGATCTTTATTTTTAATTTTTCAATATTAAGCATG	ENSG00000141646|SMAD4|82
GAGCGACCCTCCCCGTCACTCGGAGCGGGAGGCGGGGGCAGCCGGGAGAAAGGAAAGCTGCGGGGGAAAAGGGCCAAACCCTGAAATTACCCGGATGTGGTCCCCGCGCGCGCATGCTCA	ENSG00000141646|SMAD4|83
GGGTAAAATTGAACTGTGTGCCAGGTTTCACACTGATGGGGAATTTTTTACTGCAGAGTTAAACTCCTGACTATAGACTTTTATGATGGAAACACGTGGCACCCATCTTCCACGTCTGAA	ENSG00000141646|SMAD4|84
AACTTGCCCAAGAATAGGCAACTAGGAGGAGCCGGAGTAATGTGTGCTTGCTATTAGATATTTAAACAATGGAAAAATATTACAAAAGACTGCAAACTCCATGACAGCAGGGATATTTGT	ENSG00000141646|SMAD4|85
TTTGTTTATGGATATATCCCAAGTACTAGAACAGTACCTGGAACAGAAGTGCTCAAGAAATATTTTTTCAGTGAATGAATTTGTTGAATGCTAGCCCATAAAGAGAAATATTTAACAGTT	ENSG00000141646|SMAD4|86
TGGTATCTGTTTTTCTGGACTTTAAAAAATATATACTATATGTTTTTTTAATTTTATTTTTTTGAATAGGCAATACATGGTCCATAAATCAAAATACTATAAAAAGGTATACAGTGAAAA	ENSG00000141646|SMAD4|87
GAAGTGCTCCCACCCCTGCCCCCATTCCCCCCTACCTCAGGTAATCACTTTTTTTAGTTTCTGGTGTTTCCTTCCAGGGTTTCTATATGCAAAAAATACATACCTCCTTTCTTACACAAA	ENSG00000141646|SMAD4|88
ACGTATACTATGCATACTGTTCTGGACCTTGGTTTTTTACTTACAGTATATGATTTTTTAAACATGCATATGATCATAGTGTACAATAGTGCTTTGTAACTTGCTTTGATTCTCTTGGCA	ENSG00000141646|SMAD4|89
AAAATATATTGCAGACTTCTATCCTTGTTGATACCTTTAGTTTTACCTGAGAAACATTTATTATGGATTATCTGGGGTTAAAGAGATCTGTAGACCAGTAGAAGTTTCAAACTTACATTT	ENSG00000141646|SMAD4|90
GGGAAGTTTAGCCAGCATATTTAGGGCAAGAAAGATTTATGGGTCATAACTGTTTAAAAGCAGAATACAGTTGGTACATAAAGATGTTATGATTGCTGATTAAACTGAAGAGTCATCTGA	ENSG00000141646|SMAD4|91
AAAGCAAAAGCAGTGAGTACCAAGTTGACCAGTTGTATCCTCAAATCAGCTAGCAAAACCAGTAAGTTGGTAAAAAGATCCCAGTCATTATAACAACAAAAAAAACCTAAGATGTCCAGG	ENSG00000141646|SMAD4|92
AATTAATTAGAGATGTCAGGATTTATATGAAGAAAATCATTGAACTTTGTTGAAGGGTGTAATATAAGGCTGAATAAGTGTAGACATACCAATTTTGTGCCCCAAACAATTTTTTTCTTT	ENSG00000141646|SMAD4|93
TTATTATTTTTATAACTTGGCCAATGTTGATGAGTGGTTGTGTTCAGTTTTTTTTATTGATACATAATTTGTTACGCATCCTTTTGATTATCTTTTTGTTTCCATAAAATTTCTAAAGAG	ENSG00000141646|SMAD4|94
GAACTTTGGAATGGGATTTATAGGTCTTCAGAATATCATCTTCATGACTTTTGATGCATGAACATACTTCTTAAGAGGTTTTTAAGAGGTTGTACATAGAAACTTGCACAATGGATGATT	ENSG00000141646|SMAD4|95
ATTACTGCCTTAAACTAGTCTCAATTTAATAAAAAGTACCCATGTAACTTAACTGATATTTACATGTAGTAGATTTTTTTTCAAAGGTTGACATAGGGAAAGATAAGGGAAATGATATGC	ENSG00000141646|SMAD4|96
TGGTTCTTAATGAAAAAGGGAATGTCTTTTTGTGGTCTACTAATTGACTGCTTTAAGAAGAGAACCTACTGTTAGTTCAGTGGATTGTTAAGTTCTGGAGTAGTGTTAGTTTAGAAGCAA	ENSG00000141646|SMAD4|97
TAAAGGATTGGTTGCTAAAGGTAAAAAGCAAACCTTAAAACAATAACCTAAAAACAAATGGGAAGGTTCTGGGCAGAGAATTAACATTGTTAATGCAGTTCAGTTTCAGTTTTCTTTTTG	ENSG00000141646|SMAD4|98
TCATACAGCAGAGCTAACTATTTCCTGGTTGGTTAATGGAAAGATGTTATGCTGTATCAGCTGGAATCTAGCTTTGCTTATGAAGGTGTAATCACATAGGTGAAAGATGTTGATTACTGA	ENSG00000141646|SMAD4|99
GTTTTCTCACACCATATATTAATCAAATACTCTTATTTGGGTTGGGTTTCTAGAGGGAAATTTCAGTTTGACTTTTCATTTATAATTTTTCCGTTTGGTTCTAAACCTATAGGGGACATT	ENSG00000141646|SMAD4|100
ACATTCAGTACACTTCATTTTTAAAGAATATGTTGCTTAACAATAATTCTAGATCCTGGGATTGGATATCTATCAGATCCCACTCATATCTCCACAGTGTGAAATTAACAAAAAGATATA	ENSG00000141646|SMAD4|101
GTTAAATACTCAGTCTCTATTTAGACCGAATAATTGTTTTTCTCAGCTGGACACATTTTCCAGCCATTCGGTTTTTGCCTGCCTTATGTATTTAGGTGATTATTCTTCTAGGTTTATCAA	ENSG00000141646|SMAD4|102
GAAACTGAGGAGTACCTTTTTAGGATTGTTGCTGGAGGCTGTTGAAACATAGACTAGCTTCAAATTTGAGAGTCAGATTGATTGATAAAATATATCTCATGCTGTTACCGCTGAATAAAT	ENSG00000141646|SMAD4|103
GACTTTTGCTGGTAAAGTAGTATGCTTTTAAAATAATATGAAAAAATTCTGAATTAAGGTTAGTAATTTACACTGTAATTGATTTTAGGTGTTATTATATTACTTGCTAATAAGATTTTT	ENSG00000141646|SMAD4|104
AAAAACTGCTTCTCTGCATGGGGTTTATGAGTTGAGACAGACATTTATGTGAAAGAGATAACAACAGAGGGAGGAGCAAGTCTTCAATATCAGGTTATCCTGAATACATGTCTAACAATT	ENSG00000141646|SMAD4|105
ATATGATGGGAGGCAGCCAATGACTCCGCGGCGCTCCTCCGGGGGCCCTCAGTGTGCGTTTGAGGAGAACAAAAAAGAGAGAGAGAGCCGAGCGGGGGAGCGATCGAGGGAGCTGAGCCG	ENSG00000137834|SMAD6|1
AGAGAAAGAGCCGCCGGGCGCTGCCTCGCCAGACCTCGCTGGGACCCCGGGGCCACCGGGAGGCACTTTTGTGGAGGGGGGAGGGGGGGCGACCTCGGCAGCCTCGGCGCACGAAGCGTC	ENSG00000137834|SMAD6|2
CGAGGGCAGCGTGGGGCGGGCTGCGACCTCTGCATCGGTGGACTGCATTTTTAATTAAGGATTCCCAGCAGCTCTTTGGGATTTTTACAGCTTCCACTCATGTGTTGACACCCGCGTCCA	ENSG00000137834|SMAD6|3
GGAGAAACTCGCTCCAAGTGCATCTAGCGCCTGGGACCTGAGACGGCGTTGGCCTTTCGTGCATGCAAATCCAGGGATTTAGGTTTTGTTTGGGATTTCCTTTTCTTTCTTTCCTTTTTT	ENSG00000137834|SMAD6|4
TTTTCTTTTTGCAGGGAGTAAGAAGGGAGCTGGGGGTATCAACAAGCCTGCCTTTCGGATCCTGCGGGAAAAGCCCATGTAGTTAAGCGCTTTGGTTTAAAAAAAAGGCAAGGTAAAGGC	ENSG00000137834|SMAD6|5
AGGGCTTTCCAGACACATTTAGGGGTTCGCGCGAGCGCTTTGTGCTCATGGACCAGCCGCACAACTTTTGAAGGCTCGCCGGCCCATGTGGGGTCTTTCTGGCGGCGCGCCGCCTGCAGC	ENSG00000137834|SMAD6|6
CCCCCTAAAGCGCGGGGGCTGGAGTTGTTGAGCAGCCCCGCCGCTGTGGTCCATGTAGCCGCTGGCCGCGCGCGGACTGCGGCTCGGCGTGCGCGTGTTCCCGGCCGTCCCGCCTCGGCG	ENSG00000137834|SMAD6|7
AGCTCCCTCATGTTGTCGCCCTGCGGCGCCCCTTCGACGACAGGCTGTGCGCGGTCTGCACGGCGCTCCGCGGCGGAGCTTCATGTGGGGCTGCGACCCGCGCAGCCGGCGCCTCGCTGA	ENSG00000137834|SMAD6|8
GGGAACGGACCCCCGGTAACCGGAGACCGCCTCCCCCCCACCCCTGGCGCCAAAGGATATCGTATGTTCAGGTCCAAACGCTCGGGGCTGGTGCGGCGACTTTGGCGAAGTCGTGTGGTC	ENSG00000137834|SMAD6|9
AGTCGTGTGGTCCCCGACCGGGAGGAAGGCGGCAGCGGCGGCGGCGGTGGCGGCGACGAGGATGGGAGCTTGGGCAGCCGAGCTGAGCCGGCCCCGCGGGCAAGAGAGGGCGGAGGCTGC	ENSG00000137834|SMAD6|10
GAGGCTGCGGCCGCTCCGAAGTCCGCCCGGTAGCCCCGCGGCGGCCCCGGGACGCAGTGGGACAGCGAGGCGCCCAGGGC	ENSG00000137834|SMAD6|11
GCTGGGAGCTCCCTGCTGGACGTGGCGGAGCCGGGAGGCCCGGGCTGGCTGCCCGAGAGTGACTGCGAGACGGTGACCTGCTGTCTCTTTTCGGAGCGGGACGCCGCCGGCGCGCCCCGG	ENSG00000137834|SMAD6|12
GACGCCAGCGACCCCCTGGCCGGGGCGGCCCTGGAGCCGGCGGGCGGCGGGCGGAGTCGCGAAGCGCGCTCGCGGCTGCTGCTGCTGGAGCAGGAACTCAAAACCGTCACGTACTCGCTG	ENSG00000137834|SMAD6|13
ACTCGCTGCTGAAGCGGCTCAAGGAGCGCTCGCTGGACACGCTGCTGGAGGCGGTGGAGTCCCGCGGCGGCGTGCCGGGCGGCTGCGTGCTGGTGCCGCGCGCCGACCTCCGCCTGGGCG	ENSG00000137834|SMAD6|14
GCGCCGCCGCAGCTGCTGCTCGGCCGCCTCTTTCGCTGGCCCGACCTGCAGCACGCCGTGGAGCTGAAGCCCCTGTGCGGCTGCCACAGCTTCGCCGCCGCCGCCGACGGCCCTACCGTG	ENSG00000137834|SMAD6|15
TCCACATTGTCTTACACTGAAACGGAGGCTACCAACTCCCTCATCACTGCTCCGGGTGAATTCTCAGACGCCAGCATGTCTCCGGACGCCACCAAGCCGAGCCACTGGTGCAGCGTGGCG	ENSG00000137834|SMAD6|16
TACTGGGAGCACCGGACGCGCGTGGGCCGCCTCTATGCGGTGTACGACCAGGCCGTCAGCATCTTCTACGACCTACCTCAGGGCAGCGGCTTCTGCCTGGGCCAGCTCAACCTGGAGCAG	ENSG00000137834|SMAD6|17
CGCAGCGAGTCGGTGCGGCGAACGCGCAGCAAGATCGGCTTCGGCATCCTGCTCAGCAAGGAGCCCGACGGCGTGTGGGCCTACAACCGCGGCGAGCACCCCATCTTCGTCAACTCCCCG	ENSG00000137834|SMAD6|18
ACGCTGGACGCGCCCGGCGGCCGCGCCCTGGTCGTGCGCAAGGTGCCCCCCGGCTACTCCATCAAGGTGTTCGACTTCGAGCGCTCGGGCCTGCAGCACGCGCCCGAGCCCGACGCCGCC	ENSG00000137834|SMAD6|19
GACGGCCCCTACGACCCCAACAGCGTCCGCATCAGCTTCGCCAAGGGCTGGGGGCCCTGCTACTCCCGGCAGTTCATCACCTCCTGCCCCTGCTGGCTGGAGATCCTCCTCAACAACCCC	ENSG00000137834|SMAD6|20
AGATAGTGGCGGCCCCGGCGGGAGGGGCGGGTGGGAGGCCGCGGCCACCGCCACCTGCCGGCCTCGAGAGGGGCCGATGCCCAGAGACACAGCCCCCACGGACAAAACCCCCCAGATATC	ENSG00000137834|SMAD6|21
AAACCCCCCAGATATCATCTACCTAGATTTAATATAAAGTTTTATATATTATATGGAAATATATATTATACTTGTAATTATGGAGTCATTTTTACAATGTAATTATTTATGTATGGTGCA	ENSG00000137834|SMAD6|22
AAAACAAGAAAGACGCACTTTGGCTTATAATTCTTTCAATACAGATATATTTTCTTTCTCTTCCTCCTTCCTCTTCCTTACTTTTTATATATATATATAAAGAAAATGATACAGCAGAGC	ENSG00000137834|SMAD6|23
TAGGTGGAAAAGCCTGGGTTTGGTGTATGGTTTTTGAGATATTAATGCCCAGACAAAAAGCTAATACCAGTCACTCGATAATAAAGTATTCGCATTATAGTTTTTTTTAAACTGTCTTCT	ENSG00000137834|SMAD6|24
TTTTACAAAGAGGGGCAGGTAGGGCTTCAGCGGATTTCTGACCCATCATGTACCTTGAAACTTGACCTCAGTTTTCAAGTTTTACTTTTATTGGATAAAGACAGAACAAATTGAAAAGGG	ENSG00000137834|SMAD6|25
AGGAAAGTCACATTTACTCTTAAGTAAACCAGAGAAAGTTCTGTTGTTCCTTCCTGCCCATGGCTATGGGGTGTCCAGTGGATAGGGATGGCGGTGGGGAAAAGAATACACTGGCCATTT	ENSG00000137834|SMAD6|26
ATCCTGGACAAGCTCTTCCAGTCTGATGGAGGAGGTTCATGCCCTAGCCTAGAAAGGCCCAGGTCCATGCCCCCCATCTTTGAGTTATGAGCAAGCTAAAAGAAGACACTATTTCTCACC	ENSG00000137834|SMAD6|27
ATTTTGTGGAAATGGCCTGGGGAACAAAGACTGAAATGGGCCTTGAGCCCACCTGCTACCTTGCAGAGAACCATCTCGAGCCCCGTAGATCTTTTTAGGACCTCCACAGGCTATTTCCCA	ENSG00000137834|SMAD6|28
CCCCCCAGCCAAAAATAGCTCAGAATCTGCCCATCCAGGGCTGTATTAATGATTTATGTAAAGGCAGATGGTTTATTTCTACTTTGTGAAAGGGAAAAGTTGAGGTTCTGGAAGGTTAAA	ENSG00000137834|SMAD6|29
TGATTTGCTCATGAGACAAAATCAAGGTTAGAAGTTACATGGAATTGTAGGACCAGAGCCATATCATTAGATCAGCTTTCTGAAGAATATTCTCAAAAAAAGAAAGTCTCCTTGGCCAGA	ENSG00000137834|SMAD6|30
TAACTAAGAGGAATGTTTCATTGTATATCTTTTTTCTTGGAGATTTATATTAACATATTAAGTGCTCTGAGAAGTCCTGTGTATTATCTCTTGCTGCATAATAAATTATCCCCAAACTTA	ENSG00000137834|SMAD6|31
TCCCTCATCACTGCTCCGGGTGAATTCTCAGCAGCAGATGCTGGGATAGGAAGCCGAGGGAACCGTGGTTTGGAGTCCTCTGTCCCCTGCAGTTAGAAGCTGGTCATAGGGACCCCTACA	ENSG00000137834|SMAD6|32
AGGTCTGTGGGGCCCTTTGGGAGCATGGCTGGTGGCATGGTGGCCTGGTGGCATGCTGGCTGGGACTGACAGCCCCTCAGGCTGGGGCTGCATACCTTGTGGGCATGTCTGGATGGCTGT	ENSG00000137834|SMAD6|33
GTGTCTCCATCTGAGACATTCTTCCCTCACCCCACATCCATGCCATGGTAGCAGTCGCCAAAATCATAGCCATTTATTGAGTGTATGCTATGGCCGGCACTCCACTTGGCCGCTTTATAT	ENSG00000137834|SMAD6|34
GCATTCTCTTGGGACAGCCATGGGCTGTTTGTCTCCAGGGTTTGTGCTCTTCATCACTGTTTTGTCCCCCACTTTTCTGCAAGGGCCAAATGTACCTTCAATAAATGTATTTCCCCTAAA	ENSG00000137834|SMAD6|35
GCTGCAACCCCTACCACTTCAGCCGGCTCTGCGGGCCCGGTGAGCGCGCTGCGCCGGCCGGGGGGGCCCCGGGTCCCCGTCCCCATCCCCTTCCGTGCCCTTCTCTCTGTGACACTGCGG	ENSG00000137834|SMAD6|36
GTCGGCGCAGCTGCGGGTGCTCCCCCGGGTGCCCTTGGAGCGTGGGAGCCACCAGGGGAGGCGCCTCAGACCGGCCGAGGGGAGTGGGTGTCCCAGCACACACATCAAGTGGCAACTTTA	ENSG00000137834|SMAD6|37
TCTCAAGGCTCCGGTAAACTTAAAAGGGTACATGTCGTAGTTTTCTCTGTGCAGTTTCAGGGACATGATGTAGGCTCCAACTTCATAGGCAGTGAAAGGGGAGGGCAGGCCAAGGAGAGA	ENSG00000137834|SMAD6|38
CCAAAGAAGTAGGTGCTATTTCCTCCTACCTCAATTCCGGAATCTACCCCAGTCTGTGCCCAGGCTTCTAGCATTTGTATGCACGTGCCCTTACCCACACTGTGCTTTTCTATGTCCAAG	ENSG00000137834|SMAD6|39
TAGCTGTAAGTTGTGAAATTGGGTGTACACAAATCATAGCTAGAATCAAAAGTGTTCGTCAAATGTCCAATTTGTGCCTTTGCATACTTTCGACAAAGCTTTGCAGGGTAACCCCTCTCT	ENSG00000137834|SMAD6|40
GGAGTAAAGAGCACCCTCTTTATTCCCCACATAATATCATTCCCCACATCCCTTGGGTGTCAAGTGCCAGGGTCTTCCATAGTCCTTCTCAAGTTTTGTGTTCAGCTTTTGTATAGAGTT	ENSG00000137834|SMAD6|41
TAGGGTCTTGGAGGCATCCGTGAGTAGATGAAGAAGCCAGATACTGGATTACCTCTGAGAACTGCCCCCCTTCTTTGTTCTCCTCTTGGGATTTCCTGCACACGCCCCACCCTCAGCCTT	ENSG00000137834|SMAD6|42
GCTTACCTGGCCAGGCCCTGGTGCTCAGGTGCAGACAGGCAGAGGCCCCAGCAGGTCAGGAGGCTCCAGCAGGCCAGGAGCTTGCAGCTGCCTTGCTCTGACCTCTGTCTTGTGGGGAAC	ENSG00000137834|SMAD6|43
ACACACTTTAGCCTGTAGCTAGCCTCTGAGGGATGTATGGGAATCCATTAGCTGGCACTGGGGTTTTGCAGGGGTGGGACTGGCAGGGAGTCACAGGCTCTTGAGCCTGGGAGGGCTCTG	ENSG00000137834|SMAD6|44
AATCCCTCCATTCTGGCTTCCCTGGGGAGAGTCAGCACCCAGGCTGGGAGCACAGAGAGGGTCAGGTTGTAGGTCTCCTGACTCTGTGTGGAAGGGGAAAGTGGGTCTAGGATGGTGCAT	ENSG00000137834|SMAD6|45
TTGTCCTAGGTGTTTTGTTTGAGTGTGGAGTAGTGTCTGGAGAGGAAAGGAAGTTTCCCCTCAGTGATGATTCCTGCATAGAGGGCATTGATGGGGGCAGGTGGGGAGGGGAAGTGTTGA	ENSG00000137834|SMAD6|46
TGAGGCACCCTACTCCCCTCATGGTCACTCCAGTCCCAATTTAGGAGCTATGAGCAGCCCCTGATCTGTGGCTCATGCCAGGCTTTCTATGTACTCTTTTCCCCTTACTGACAGCTTTCC	ENSG00000137834|SMAD6|47
CTGGAAGTGACTTTCTCCCCTCTGCCAACTGACTCCCCACTGCCTCTGGGGAAGGAGACCAGTATTTATGGTTGTCTTGTTCCTGGTGATTTTTTTTTTTTTAAAGTAGGTCCCTTCCAC	ENSG00000137834|SMAD6|48
ACTTCAGTGTGCAGCAGATGTTTGTTGAGCAATTACTTTGGGCCAGGCACTGTGCTGGGTGCTGTGGCTAACAGAGTGGAAATATGAGTAGGATCTATGCCCTCAAGAAACATAATCCCA	ENSG00000137834|SMAD6|49
CCAGGGATTTATGGGGGAGAGATGGGGGAAGAAGGGAAGTGTGCAGGGCCAGGTCATTGGGTGTGAACTACCAGAAGGCTGTGGGTGTGTATGTAATAGGATGGCATGCAGGAGCTCCAC	ENSG00000137834|SMAD6|50
AGCTCCAACCTGGAGCCGGACCTTGGAGGATGGGTCAGAGGAGAGGGAGCCAGCCGGGTCAGAGGAGAGGGAGCCAGCCAGCTCAGAGTCAAGGTGCCAGGCACGTTCAGGTGGTTGGGC	ENSG00000137834|SMAD6|51
AGGGAGGGGAGGAGTGAAAAAGTTGGAGACGATGGACAGGACCACTCCTGCTACTACTCCTGGGACTAGGAGTTGGCTTGGGTGTTGGTTTGCATTTGGTAGGTTTGGAGAGGTACAGGT	ENSG00000137834|SMAD6|52
CAAGAGATACCTGGCAAGCTGCAGTAGAACAGTTCTTGACCATGGACCTGGTCCCAGGCTCTGCCCAGCTAGTAACGTGCAGCTTGACTTTGGATGAGTTACCTCCCTTCTCAGCCACCG	ENSG00000137834|SMAD6|53
TGCTGGTCAGTGGGGGTGGCTCTAGGAATATTCTCCCCATCTAAATCTGGACTAAGCCTTGGGACTTGATTCCCCTCCTTCTCCCAGAAGGAGGCGCTGTTGCCAGGGCTGCAGCACCCC	ENSG00000137834|SMAD6|54
AAGTCTCCTCCCTTTTCTTTGCTAGCTGCTAGCCTGTGGGGCCCCCATTCAGCCACCCTGGGGACAGCTGGGAGGACCGATGGTCCGGGAAGAGTTTCCAGTATGTGCCAGGTTGATCCT	ENSG00000137834|SMAD6|55
CTTGCCCCTGGCCTGAGAGCTGGGGGAGCCCTGGGCTGCCCACCCGCCTCCACCGCTTGGCCGCCAGCTTGGCTCCCGTAACTGGGCGGGCGCATAGCTGGGGCTCAGCGGTGCGCGTCC	ENSG00000137834|SMAD6|56
TGATAAGGAGACTGCGCCTTCCAGGGCTCTGGGAAGAGGGCCGGGGCACCGGGCAGACAGATGCGCGCACACACATAGCGCAGGCACACCGCTAGCGAGCAAAGTACACTGGAACACCGG	ENSG00000137834|SMAD6|57
CACTGAGGGACTCCCACCTGGCAGCAGTCACCTCCGCACCTTCACCGACCACTGCAGGGAGCCCCGGTGACAGAAGACCCCTTCCTGGGCAGTGTGGACCCCTGCTGTTCAGAGCCCACT	ENSG00000137834|SMAD6|58
CTCCATCAACTTGAGTTGTGGCCTTGGGGCTAGTTTCCTCTTTGGGCTTCTTTTCCTATATCTAAAGTAAAGGGTTGGAGGGAATCTGCACAATCTGAGGGCTGATGTGCAGATTCCAGG	ENSG00000137834|SMAD6|59
CCACACAGGCCTCCGTCCCCTCCCCCACTCTGCCCCAGGCTTGTCTCGGAAACTGGGGTCCTCAGGAGGGGACCCACCTCTTCTGGGCATGGGCTAGGGGCCTCCTGGCCTCCCAGCCCG	ENSG00000137834|SMAD6|60
TGGGAGTCAGGCCCAACTCTGCCTCCCCCTTGGGTGTCTTTCTGTCCCAGGAAAAGCCAGTTCGCTGAGCTCGGTGGGTGCCTATGTGGACGGAAATGTGGAGAAATACTTTAATCACAG	ENSG00000137834|SMAD6|61
CTCTAACCTGTGTTTATAGAGCTCCTTTCTCCTGAAAGTATCCATTAACTTCGGAATAAATCTCCTGCTCTTTGCTTCCCCACTTTTTTTTTTTCTGTAATTATATTCAGTAAATTACTA	ENSG00000137834|SMAD6|62
TTATCCAAATTGCGCCCGGGGAAGAGAGACAGAGCGAGAGAGAGAGAACTTCTAAACGACTGGAGGAGGCCGCCTAGGAAAACACAGGGTTCCCAGGCCAGGACTATAGGAATTAGAATG	ENSG00000137834|SMAD6|63
GGCTAGAAAGTTTTCCTTTTATTTGGCCTGGCATTATCCCTTTGAAATGAGATCAATTTCAAGTTGGGCTTCCAAGCCCCCGCCCTGCCCGGCTCAGCGGCCCCTAGCCCTGCTTGTCTG	ENSG00000137834|SMAD6|64
CTCCTCCTAGCTCCTCCTGGAGGTGAGGAAGGGGTGATAATGTGCAGTTTGCCTCTTGCTGGCGCCAGCCGGCCGCGCTGTTTATCTGGCTGCCAGGGGAATCTGGGCAATTAGGCTCAG	ENSG00000137834|SMAD6|65
GCGGCCTTAAAGTGCCAGGAGCTCCTTTTCTGCGTCTCCCATCATGGGGCTTAGGGTTGAGTCTTCAGGTTCTGGGGGCAGGAAGGACGGGCACTCAGGAGGCCCCCTCCCCATCCACAG	ENSG00000137834|SMAD6|66
CCCCTCTTTGGGAGGGGGGAAACTTGGCAACCCGGGAGGCATGTGGATCTTTTCCTAAGCAAGATGCTGAGCTGGAAAGATGGGGGTGTAAGGTAATGTCCCAAACTGAAACTTTGCCAG	ENSG00000137834|SMAD6|67
GCACTGGGAGAGGCTGTGAACTCTTTTCTGGCTTTAGAATTTAGGTCTAGATCCCAAAAGGCTAAGTACCCCCTGGGGGCTAACCAGAGGCATGCCTGGGCTGAGCTGAACCTTCTGGTG	ENSG00000137834|SMAD6|68
CACTGGCCCCTGGCTGACTGCTCTTCTGCAGGAAGTTGGAGGAGATTCCTGAAGTTGATTCCTCAGGCTGGATGTCCAAGGGGGTTGGAGTTTCTGATGTCTTTCTGTCTCCCTCTCTTT	ENSG00000137834|SMAD6|69
TCTTTCTCTCCCTACCAGGTCCACTTCTTTCAGAGGGGCCTGCGGTGCTCTAAAAGTTCTCCTGTTAAAGTTTAGAGCAAATTGGTTATTATTTTAAAATCAATAAAACTTTTAAAAGTA	ENSG00000137834|SMAD6|70
AGACGCCCGGTGAATTCTAGAGGCGGCGGAGGGTGGCGAGGAGCTCTCGCTTTCTCTCGCTCCCTCCCTCTCCGACTCCGTCTCTCTCTCTCTCTCTCTCTCTCCCCTCCCTCTCTTTCC	ENSG00000135111|TBX3|1
CTCTGTTCCATTTTTTCCCCCTCTAAATCCTCCCTGCCCTGCGCGCCTGGACACAGATTTAGGAAGCGAATTCGCTCACGTTTTAGGACAAGGAAGAGAGAGAGGCACGGGAGAAGAGCC	ENSG00000135111|TBX3|2
CAGCAAGATTTGGATTGAAACCGAGACACCCTCCGGAGGCTCGGAGCAGAGGAAGGAGGAGGAGGGCGGCGAACGGAAGCCAGTTTGCAATTCAAGTTTTGATAGCGCTGGTAGAAGGGG	ENSG00000135111|TBX3|3
GTTTAAATCAGATTTTTTTTTTTTTAAAGGAGAGAGACTTTTTCCGCTCTCTCGCTCCCTGTTAAAGCCGGGTCTAGCACAGCTGCAGACGCCACCAGCGAGAAAGAGGGAGAGGAAGAC	ENSG00000135111|TBX3|4
AGATAGGGGGCGGGGGAAGAAGAAAAAGAAAGGTAAAAAGTCTTCTAGGAGAACCTTTCACATTTGCAACAAAAGACCTAGGGGCTGGAGAGAGATTCCTGGGACGCAGGGCTGGAGTGT	ENSG00000135111|TBX3|5
CTATTTCGAGCTCAGCGGCAGGGCTCGGGCGCGAGTCGAGACCCTGCTCGCTCCTCTCGCTTCTGAAACCGACGTTCAGGAGCGGCTTTTTAAAAACGCAAGGCACAAGGACGGTCACCC	ENSG00000135111|TBX3|6
GCGCGACTATGTTTGCTGATTTTTCGCCTTGCCCTCTTTAAAAGCGGCCTCCCATTCTCCAAAAGACACTTCCCCTCCTCCCTTTGAAGTGCATTAGTTGTGATTTCTGCCTCCTTTTCT	ENSG00000135111|TBX3|7
TTTTTCTTTCTTTTTTGTTTTGCTTTTTCCCCCCTTTTGAATTATGTGCTGCTGTTAAACAACAACAAAAAAACAACAAAACACAGCAGCTGCGGACTTGTCCCCGGCTGGAGCCCAGCG	ENSG00000135111|TBX3|8
CCCCGCCTGGAGTGGATGAGCCTCTCCATGAGAGATCCGGTCATTCCTGGGACAAGCATGGCCTACCATCCGTTCCTACCTCACCGGGCGCCGGACTTCGCCATGAGCGCGGTGCTGGGT	ENSG00000135111|TBX3|9
CACCAGCCGCCGTTCTTCCCCGCGCTGACGCTGCCTCCCAACGGCGCGGCGGCGCTCTCGCTGCCGGGCGCCCTGGCCAAGCCGATCATGGATCAATTGGTGGGGGCGGCCGAGACCGGC	ENSG00000135111|TBX3|10
ATCCCGTTCTCCTCCCTGGGGCCCCAGGCGCATCTGAGGCCTTTGAAGACCATGGAGCCCGAAGAAGAGGTGGAGGACGACCCCAAGGTGCACCTGGAGGCTAAAGAACTTTGGGATCAG	ENSG00000135111|TBX3|11
TTTCACAAGCGGGGCACCGAGATGGTCATTACCAAGTCGGGAAGGCGAATGTTTCCTCCATTTAAAGTGAGATGTTCTGGGCTGGATAAAAAAGCCAAATACATTTTATTGATGGACATT	ENSG00000135111|TBX3|12
ATAGCTGCTGATGACTGTCGTTATAAATTTCACAATTCTCGGTGGATGGTGGCTGGTAAGGCCGACCCCGAAATGCCAAAGAGGATGTACATTCACCCGGACAGCCCCGCTACTGGGGAA	ENSG00000135111|TBX3|13
CAGTGGATGTCCAAAGTCGTCACTTTCCACAAACTGAAACTCACCAACAACATTTCAGACAAACATGGATTTACTATATTGAACTCCATGCACAAATACCAGCCCCGGTTCCACATTGTA	ENSG00000135111|TBX3|14
AGAGCCAATGACATCTTGAAACTCCCTTATAGTACATTTCGGACATACTTGTTCCCCGAAACTGAATTCATCGCTGTGACTGCATACCAGAATGATAAGATAACCCAGTTAAAAATAGAC	ENSG00000135111|TBX3|15
AACAACCCTTTTGCAAAAGGTTTCCGGGACACTGGAAATGGCCGAAGAGAAAAAAGAAAACAGCTCACCCTGCAGTCCATGAGGGTGTTTGATGAAAGACACAAAAAGGAGAATGGGACC	ENSG00000135111|TBX3|16
TCTGATGAGTCCTCCAGTGAACAAGCAGCTTTCAACTGCTTCGCCCAGGCTTCTTCTCCAGCCGCCTCCACTGTAGGGACATCGAACCTCAAAGATTTATGTCCCAGCGAGGGTGAGAGC	ENSG00000135111|TBX3|17
GACGCCGAGGCCGAGAGCAAAGAGGAGCATGGCCCCGAGGCCTGCGACGCGGCCAAGATCTCCACCACCACGTCGGAGGAGCCCTGCCGTGACAAGGGCAGCCCCGCGGTCAAGGCTCAC	ENSG00000135111|TBX3|18
CTTTTCGCTGCTGAGCGGCCCCGGGACAGCGGGCGGCTGGACAAAGCGTCGCCCGACTCACGCCATAGCCCCGCCACCATCTCGTCCAGCACTCGCGGCCTGGGCGCGGAGGAGCGCAGG	ENSG00000135111|TBX3|19
GGCAAGGAGGCCTTCGCGCCGCTCACGGTGCAGACGGACGCGGCCGCCGCGCACCTGGCCCAGGGCCCCCTGCCTGGCCTCGGCTTCGCCCCGGGCCTGGCGGGCCAACAGTTCTTCAAC	ENSG00000135111|TBX3|20
CAACGGGCACCCGCTCTTCCTGCACCCCAGCCAGTTTGCCATGGGGGGCGCCTTCTCCAGCATGGCGGCCGCTGGCATGGGTCCCCTCCTGGCCACGGTTTCTGGGGCCTCCACCGGTGT	ENSG00000135111|TBX3|21
CTCGGGCCTGGATTCCACGGCCATGGCCTCTGCCGCTGCGGCGCAGGGACTGTCCGGGGCGTCCGCGGCCACCCTGCCCTTCCACCTCCAGCAGCACGTCCTGGCCTCTCAGGGCCTGGC	ENSG00000135111|TBX3|22
CATGTCCCCTTTCGGAAGCCTGTTCCCTTACCCCTACACGTACATGGCCGCAGCGGCGGCCGCCTCCTCTGCGGCAGCCTCCAGCTCGGTGCACCGCCACCCCTTCCTCAATCTGAACAC	ENSG00000135111|TBX3|23
CATGCGCCCGCGGCTGCGCTACAGCCCCTACTCCATCCCGGTGCCGGTCCCGGACGGCAGCAGTCTGCTCACCACCGCCCTGCCCTCCATGGCGGCGGCCGCGGGGCCCCTGGACGGCAA	ENSG00000135111|TBX3|24
AGTCGCCGCCCTGGCCGCCAGCCCGGCCTCGGTGGCAGTGGACTCGGGCTCTGAACTCAACAGCCGCTCCTCCACGCTCTCCTCCAGCTCCATGTCCTTGTCGCCCAAACTCTGCGCGGA	ENSG00000135111|TBX3|25
GAAAGAGGCGGCCACCAGCGAACTGCAGAGCATCCAGCGGTTGGTTAGCGGCTTGGAAGCCAAGCCGGACAGGTCCCGCAGCGCGTCCCCGTAGACCCGTCCCAGACACGTCTTTTCATT	ENSG00000135111|TBX3|26
CCAGTCCAGTTCAGGCTGCCGTGCACTTTGTCGGATATAAAATAAACCACGGGCCCGCCATGGCGTTAGCCCTTCCTTTTGCAGTTGCGTCTGGGAAGGGGCCCCGGACTCCCTCGAGAG	ENSG00000135111|TBX3|27
AATGTGCTAGAGACAGCCCCTGTCTTCTTGGCGTGGTTTATATGTCCGGGATCTGGATCAGATTCTGGGGGCTCAGAAACGTCGGTTGCATTGAGCTACTGGGGGTAGGAGTTCCAACAT	ENSG00000135111|TBX3|28
TTATGTCCAGAGCAACTTCCAGCAAGGCTGGTCTGGGTCTCTGCCCACCAGGCGGGGAGGTGTTCAAAGACATCTCCCTCAGTGCGGATTTATATATATATTTTTCCTTCACTGTGTCAA	ENSG00000135111|TBX3|29
GTGGAAACAAAAACAAAATCTTTCAAAAAAAAAATCGGGACAAGTGAACACATTAACATGATTCTGTTTGTGCAGATTAAAAACTTTATAGGGACTTGCATTATCGGTTCTCAATAAATT	ENSG00000135111|TBX3|30
ACTGAGCAGCTTTGTTTGGGGAGGGAAGTCCCTACCATCCTTGTTTAGTCTATATTAAGAAAATCTGTGTCTTTTTAATATTCTTGTGATGTTTTCAGAGCCGCTGTAGGTCTCTTCTTG	ENSG00000135111|TBX3|31
CATGTCCACAGTAATGTATTTGTGGTTTTTATTTTGAACGCTTGCTTTTAGAGAGAAAACAATATAGCCCCCTACCCTTTTCCCAATCCTTTGCCCTCAAATCAGTGACCCAAGGGAGGG	ENSG00000135111|TBX3|32
GGGGATTTAAAGGGAAGGAGTGGGCAAAACACATAAAATGAATTTATTATATCTAAGCTCTGTAGCAGGATTCATGTCGTTCTTTGACAGTTCTTTCTCTTTCCTGTATATGCAATAACA	ENSG00000135111|TBX3|33
AGGTTTTAAAAAAATAATAAAGAAGTGAGACTATTAGACAAAGTATTTATGTAATTATTTGATAACTCTTGTAAATAGGTGGAATATGAATGCTTGGAAAATTAAACTTTAATTTATTGA	ENSG00000135111|TBX3|34
CATTGTACATAGCTCTGTGTAAATAGAATTGCAACTGTCAGGTTTTGTGTTCTTGTTTTCCTTTAGTTGGGTTTATTTCCAGGTCACAGAATTGCTGTTAACACTAGAAAACACACTTCC	ENSG00000135111|TBX3|35
TGCACCAACACCAATACCCTTTCAAAAGAGTTGTCTGCAACATTTTTGTTTTCTTTTTTAATGTCCAAAAGTGGGGGAAAGTGCTATTTCCTATTTTCACCAAAATTGGGGAAGGAGTGC	ENSG00000135111|TBX3|36
CACTTTCCAGCTCCACTTCAAATTCCTTAAAATATAACTGAGATTGCTGTGGGGAGGGAGGAGGGCAGAGGCTGCGGTTTGACTTTTTAATTTTTCTTTTGTTATTTGTATTTGCTAGTC	ENSG00000135111|TBX3|37
TCTGATTTCCTCAAAACGAAGTGGAATTTACTACTGTTGTCAGTATCGGTGTTTTGAATTGGTGCCTGCCTATAGAGATATATTCACAGTTCAAAAGTCAGGTGCTGAGAGATGGTTTAA	ENSG00000135111|TBX3|38
AGACAAATTCATGAAGGTATATTTTGTGTTATAGTTGTTGATGAGTTCTTTGGTTTTCTGTATTTTTCCCCCTCTCTTTAAAACATCACTGAAATTTCAATAAATTTTTATTGAAATGTC	ENSG00000135111|TBX3|39
GAAACTCACCAACAACATTTCAGACAAACATGGATTTGTAAGTTTCATTGCTCTCTTCAGTAAAATTTTCTCCTCCTTCACTCAGTCAAAGGCAGTGCTTCCCATTTCATGAGTTTCAGC	ENSG00000135111|TBX3|40
CCAGACTTCTCCTTTGCTTCTCCCTAAGCATAGCAAACTTGTCCTCGTCTGGAAAAAGGATTCGGGGTGTTTCTCTCCAAATAATGGAAGGCCTGGCGTTCTAAAAGAAATGGGGCAAGA	ENSG00000135111|TBX3|41
AAACTTACCGGCTTGTGTTCTATAGCAATTCCAGCTCTTTGGTAGATTCCTGACCTGAGAGTGAAGTTAAAAACCATTTTTTAAGAGCTAAAATCAATTTCAAGGCTATGTATTCCTAAA	ENSG00000135111|TBX3|42
GGATTTGTTTTGTTTTAAAATATCATACTTCTGTTTTGAAACCAGTGATATTATTTTCTCAGGAGAGTTTACGTTTCGGAGCCTTGACTCTGTTGGTTAAATGGTGTGAATACATTTTTA	ENSG00000135111|TBX3|43
AAAACTCGTTCTTTTACTAAAAAAAGAATTGGGCTTAGGTGGGAGTCCGGCTTACCCTAAATGAGGCTTAGATCTTCAGAAAAAAATGGTTTGTGTGTTGGGAGTGTATATATGGATTCA	ENSG00000135111|TBX3|44
GTGACAGTGCTTAGAAACTTAGAAAACTTTCATTGCTTGTAGATATCAGGCAAAGGACCTTTTGCGCCTTTTCCTACCCCTCCCCAACATTTCAATAAAATAAACAGCGTGATAAGCAAG	ENSG00000135111|TBX3|45
GAGTAAGCAGAAAGATTAGGCCCAGGAAGACGCGAATGGCGCGGAAATATCTTCAGCGGGCAGGAATTGCATTTGAAGCCCTTGATTTGATTAAGGCATAAATATTCCTCTCTAGAGTTC	ENSG00000135111|TBX3|46
AGCCTTTCAGGGCTTTAAGTGGATTGGGCTCGTCAATTAGTGGGCGCTTAAAGTACTGAATCATTTTGTAAATTAAAATGCATGTTTTTCTCTATCTTTTAAGACTTTGGCCTTCCCAAG	ENSG00000135111|TBX3|47
AATTATAGTTTTGGTACTCAGGTAGGCTAGGGTTCAAGGTATGAATGATCCTTAGATGGTGAGGGTGGGGGGGGCCCTTTGGCAACTGAGGAGCAATTTGGATTCTCCAGAAGATAACAT	ENSG00000135111|TBX3|48
CTGTGGAGCGAAACGTACCCAGGGGGTACTCCAAGGAGGTGGGCTCGGTACAAGCGTGGTACCCTGCGGTGGGGAAGATTTCAGCCTGGCAGGGGTCCTAAGATCCCGTTTGTTCTGCTA	ENSG00000135111|TBX3|49
CATGCCTTATGCAAGAGACCTCAGTCCCCCGGAACAACTCGATTTCCTTCCAATAGAGGTCTGAGGTGGACTCCCACCTCCCTTCGTGAAGAGTTCCCTCCTCTCCCCCTTCCTAAGAAA	ENSG00000089225|TBX5|1
GTCGATCTTGGCTCTATTTGTGTCTTATGTTCATCACCCTCATTCCTCCGGAGAAAGCCGGGTTGGTTTATGTCTTTATTTATTCCCGGGGCCAAGACGTCCGGAACCTGTGGCTGCGCA	ENSG00000089225|TBX5|2
GACCCGGCACTGATAGGCGAAGACGGAGAGAAATTTACCTCCCGCCGCTGCCCCCCAGCCAAACGTGACAGCGCGCGGGCCGGTTGCGTGACTCGTGACGTCTCCAAGTCCTATAGGTGC	ENSG00000089225|TBX5|3
AGCGGCTGGTGAGATAGTCGCTATCGCCTGGTTGCCTCTTTATTTTACTGGGGTATGCCTGGTAATAAACAGTAATATTTAATTTGTCGGAGACCACAAACCAACCTTGAGCTGGGAGGT	ENSG00000089225|TBX5|4
ACGTGCTCTTCTTGACAGACGTTGGAAGAAGACCTGGCCTAAAGAGGTCTCTTTTGGTGGTCCTTTTCAAAGTCTTCACCTGAGCCCTGCTCTCCAGCGAGGCGCACTCCTGGCTTTTGC	ENSG00000089225|TBX5|5
GCTCCAAAGAAGAGGTGGGATAGTTGGAGAGCAGAACCTTGCGCGGGCACAGGGCCCTGGGCGCACCATGGCCGACGCAGACGAGGGCTTTGGCCTGGCGCACACGCCTCTGGAGCCTGA	ENSG00000089225|TBX5|6
CGCAAAAGACCTGCCCTGCGATTCGAAACCCGAGAGCGCGCTCGGGGCCCCCAGCAAGTCCCCGTCGTCCCCGCAGGCCGCCTTCACCCAGCAGGGCATGGAGGGAATCAAAGTGTTTCT	ENSG00000089225|TBX5|7
CCATGAAAGAGAACTGTGGCTAAAATTCCACGAAGTGGGCACGGAAATGATCATAACCAAGGCTGGAAGGCGGATGTTTCCCAGTTACAAAGTGAAGGTGACGGGCCTTAATCCCAAAAC	ENSG00000089225|TBX5|8
GAAGTACATTCTTCTCATGGACATTGTACCTGCCGACGATCACAGATACAAATTCGCAGATAATAAATGGTCTGTGACGGGCAAAGCTGAGCCCGCCATGCCTGGCCGCCTGTACGTGCA	ENSG00000089225|TBX5|9
CCCAGACTCCCCCGCCACCGGGGCGCATTGGATGAGGCAGCTCGTCTCCTTCCAGAAACTCAAGCTCACCAACAACCACCTGGACCCATTTGGGCATATTATTCTAAATTCCATGCACAA	ENSG00000089225|TBX5|10
ATACCAGCCTAGATTACACATCGTGAAAGCGGATGAAAATAATGGATTTGGCTCAAAAAATACAGCGTTCTGCACTCACGTCTTTCCTGAGACTGCGTTTATAGCAGTGACTTCCTACCA	ENSG00000089225|TBX5|11
GAACCACAAGATCACGCAATTAAAGATTGAGAATAATCCCTTTGCCAAAGGATTTCGGGGCAGTGATGACATGGAGCTGCACAGAATGTCAAGAATGCAAAGTAAAGAATATCCCGTGGT	ENSG00000089225|TBX5|12
CCCCAGGAGCACCGTGAGGCAAAAAGTGGCCTCCAACCACAGTCCTTTCAGCAGCGAGTCTCGAGCTCTCTCCACCTCATCCAATTTGGGGTCCCAATACCAGTGTGAGAATGGTGTTTC	ENSG00000089225|TBX5|13
CGGCCCCTCCCAGGACCTCCTGCCTCCACCCAACCCATACCCACTGCCCCAGGAGCATAGCCAAATTTACCATTGTACCAAGAGGAAAGAGGAAGAATGTTCCACCACAGACCATCCCTA	ENSG00000089225|TBX5|14
TAAGAAGCCCTACATGGAGACATCACCCAGTGAAGAAGATTCCTTCTACCGCTCTAGCTATCCACAGCAGCAGGGCCTGGGTGCCTCCTACAGGACAGAGTCGGCACAGCGGCAAGCTTG	ENSG00000089225|TBX5|15
CACCGTGCAGCCCATGGACAGGCTACCCTACCAGCACTTCTCCGCTCACTTCACCTCGGGGCCCCTGGTCCCTCGGCTGGCTGGCATGGCCAACCATGGCTCCCCACAGCTGGGAGAGGG	ENSG00000089225|TBX5|16
AATGTTCCAGCACCAGACCTCCGTGGCCCACCAGCCTGTGGTCAGGCAGTGTGGGCCTCAGACTGGCCTGCAGTCCCCTGGCACCCTTCAGCCCCCTGAGTTCCTCTACTCTCATGGCGT	ENSG00000089225|TBX5|17
GCCAAGGACTCTATCCCCTCATCAGTACCACTCTGTGCACGGAGTTGGCATGGTGCCAGAGTGGAGCGACAATAGCTAAAGTGAGGCCTGCTTCACAACAGACATTTCCTAGAGAAAGAG	ENSG00000089225|TBX5|18
AGAGAGAGAGGAGAAAGAGAGAGAAGGAGAGAGACAGTAGCCAAGAGAACCCCACGGACAAGATTTTTCATTTCACCCAATGTTCACATCTGCACTCAAGGTCGCTGGATGCTGATCTAA	ENSG00000089225|TBX5|19
TCAGTAGCTTGAAACCACAATTTTAAAAATGTGACTTTCTTGTTTTGTCTCAAAACTTAAAAAAACAAACACAAAAAGATGAGTCCCACCCCCCACTACCACCACACCCATCAACCAGCC	ENSG00000089225|TBX5|20
ACATTCACGCTACTCCCCAGATCTCTTCCCCCATTCCTTCTTTTGGGCTCTAGAAAGTCTTGCCTCATTGAGTGTTTTTCCCTAGTGCGTAGTTGGAGTCTGTCCCTGTCTTGGTGTTAA	ENSG00000089225|TBX5|21
TGTTGACATTGTTATATAATAAATGATAATATATTTTTTTCTTTCAATTTTCTTAATGGGACCCAGTCCCTTATTTGGGGGGAGGTCTGAGGCAAGTATATTTCAAAATATGTACTTGCG	ENSG00000089225|TBX5|22
GGATTCCCTTCAAGTAAACCATCCCTGAAACCTAAATTCACGTTTCCCCTTGACTAAGAAAAGCACCTACCTCTGCCATGTGATGTTTCTGAAAAGCCTCTGTATGTCCCCATTTGCTTT	ENSG00000089225|TBX5|23
GGTTTTGTCCTGCCTTCTCCAATATCACGTGCTCAGTTTTGCCTCTACTTACCCATGGAGTCAGGATAACACTGACGCTCCCTGGCATCCTATCTTATTCAGCCCTACCATCTTGCCAGC	ENSG00000089225|TBX5|24
TCTGTCTTTCCAGCTGTCTGTCGCTAAAACGTGGCCTATAGCTTCCCTTCCGGAAAGCTTGCTTTGAAAAACTTAAAAAGCCCCCGTTTACATGTAGGCAGGACTGTGATAACAGTGCAA	ENSG00000089225|TBX5|25
GCTCTGTGTTGACAAGAGTTGTGGACAAAAAGCCAAAATAAATATTCTTCCTGATTAAAAAAATTTTTTTTGAAAAAAACAAGGCCAGCCCCAACCTTCCAAACCTCCATCACCAACAAC	ENSG00000089225|TBX5|26
CCAAACTGGATGTCAAGCAAAATGCACAATTCCTACAGAAGAGGCAAGACACAGTCACCAATGATATCTCGCCAAAGAAACCACGCCCACACCAATGCCAACACAAAACTGTGTTTACTG	ENSG00000089225|TBX5|27
AAAGCCGAAAACAGTATTAAAAAAAGTGTGTAAGTAAAGTGTTATGGTAGGGTTCTTCAGATGTAATATTTTACTGGTACTATTTATTTATAAATAGGAATTCTAATTAAGTAATAACAT	ENSG00000089225|TBX5|28
TATAAATAGGAATTCTAATTAAGTAATAACATGAAATGAAACCCAGCATAGGAGCTGGCCAAGAGCTTTTAATTTTATTGATACTCAAAACCAAGTTTGTGTTTTTTTGTTTTTTTTTGT	ENSG00000089225|TBX5|29
TTGATTAAAAAGAATTTTTTTTTTCCTTTTTTATAAACAGACCCTAATAAAGAGAACAGGGTAAGATGTGAGGCTGAGTGTGTTTAAGTACGTGAGAGAGTGTGAGTGTGTTTGTAAGTG	ENSG00000089225|TBX5|30
AGTGTCCCTATGCGATTATGTCTCTTTACGTTGCTAAGGGGGGAGGGTGAGGATTAAGTACTCGTGCCTTATATTTGTGTGCCAATTAATGCCTAATAAATACCATGTGCTTAAACAAGT	ENSG00000089225|TBX5|31
TTCAGAGAGAGAGAGAGAGGGAGAGAGAGTGAGAGAGACTGACTCTTACCTCGAATCCGGGAACTTTAATCCTGAAAGCTGCGCTCAGAAAGGACTTCGACCATTCACTGGGCTTCCAAC	ENSG00000089225|TBX5|32
TTTCCCTCCCTGGGGGTGTAAAGGAGGAGCGGGGCACTGAGATTATATGGTTGCCGGTGCTCTTGGAGGCTATTTTGTGTTCTTTGGCGCTTGCCAACTGGGAAGTATTTAGGGAGAGCA	ENSG00000089225|TBX5|33
AGCGCACAGCAGAGGAGGTGTGTGTTGGAGGTGGGCAGTCGCCGCGGAGGCTCCAGCGGTAGGTGCGCCCTAGTAGGCAGCAGTAGCCGCTATTCTGGGTAAGCAGTAAACCCCGCATAA	ENSG00000089225|TBX5|34
ACCCCGGAGCCACCATGCCTGCTCCCCCGCCTCACCGCCGGCTTCCCTGCTAGGAGCAGCAGAGGATGTGGTGAATGCACCGGCTTCACCGAACGAGAGCAGAACCTTGCGCGGGCACAG	ENSG00000089225|TBX5|35
GCCGCCGCCGCCCTTCGCGCCCTGGGCCATCTCCCTCCCACCTCCCTCCGCGGAGCAGCCAGACAGCGAGGGCCCCGGCC	ENSG00000105329|TGFB1|1
GCGGGGCCGGCCTCGGCCCGGAGCGGAGGAAGGAGTCGCCGAGGAGCAGCCTGAGGCCCCAGAGTCTGAGACGAGCCGCCGCCGCCCCCGCCACTGCGGGGAGGAGGGGGAGGAGGAGCG	ENSG00000105329|TGFB1|2
GGAGGAGGAGCGGGAGGAGGGACGAGCTGGTCGGGAGAAGAGGAAAAAAACTTTTGAGACTTTTCCGTTGCCGCTGGGAGCCGGAGGCGCGGGGACCTCTTGGCGCGACGCTGCCCCGCG	ENSG00000105329|TGFB1|3
AGGAGGCAGGACTTGGGGACCCCAGACCGCCTCCCTTTGCCGCCGGGGACGCTTGCTCCCTCCCTGCCCCCTACACGGCGTCCCTCAGGCGCCCCCATTCCGGACCAGCCCTCGGGAGTC	ENSG00000105329|TGFB1|4
GCCGACCCGGCCTCCCGCAAAGACTTTTCCCCAGACCTCGGGCGCACCCCCTGCACGCCGCCTTCATCCCCGGCCTGTCTCCTGAGCCCCCGCGCATCCTAGACCCTTTCTCCTCCAGGA	ENSG00000105329|TGFB1|5
GACGGATCTCTCTCCGACCTGCCACAGATCCCCTATTCAAGACCACCCACCTTCTGGTACCAGATCGCGCCCATCTAGGTTATTTCCGTGGGATACTGAGACACCCCCGGTCCAAGCCTC	ENSG00000105329|TGFB1|6
CCCTCCACCACTGCGCCCTTCTCCCTGAGGACCTCAGCTTTCCCTCGAGGCCCTCCTACCTTTTGCCGGGAGACCCCCAGCCCCTGCAGGGGCGGGGCCTCCCCACCACACCAGCCCTGT	ENSG00000105329|TGFB1|7
CTGTTCGCGCTCTCGGCAGTGCCGGGGGGCGCCGCCTCCCCCATGCCGCCCTCCGGGCTGCGGCTGCTGCCGCTGCTGCTACCGCTGCTGTGGCTACTGGTGCTGACGCCTGGCCGGCCG	ENSG00000105329|TGFB1|8
CGGGACTATCCACCTGCAAGACTATCGACATGGAGCTGGTGAAGCGGAAGCGCATCGAGGCCATCCGCGGCCAGATCCTGTCCAAGCTGCGGCTCGCCAGCCCCCCGAGCCAGGGGGAGG	ENSG00000105329|TGFB1|9
TGCCGCCCGGCCCGCTGCCCGAGGCCGTGCTCGCCCTGTACAACAGCACCCGCGACCGGGTGGCCGGGGAGAGTGCAGAACCGGAGCCCGAGCCTGAGGCCGACTACTACGCCAAGGAGG	ENSG00000105329|TGFB1|10
TCACCCGCGTGCTAATGGTGGAAACCCACAACGAAATCTATGACAAGTTCAAGCAGAGTACACACAGCATATATATGTTCTTCAACACATCAGAGCTCCGAGAAGCGGTACCTGAACCCG	ENSG00000105329|TGFB1|11
CTGCGTCTGCTGAGGCTCAAGTTAAAAGTGGAGCAGCACGTGGAGCTGTACCAGAAATACAGCAACAATTCCTGGCGATACCTCAGCAACCGGCTGCTGGCACCCAGCGACTCGCCAGAG	ENSG00000105329|TGFB1|12
TGGTTATCTTTTGATGTCACCGGAGTTGTGCGGCAGTGGTTGAGCCGTGGAGGGGAAATTGAGGGCTTTCGCCTTAGCGCCCACTGCTCCTGTGACAGCAGGGATAACACACTGCAAGTG	ENSG00000105329|TGFB1|13
GACATCAACGGGTTCACTACCGGCCGCCGAGGTGACCTGGCCACCATTCATGGCATGAACCGGCCTTTCCTGCTTCTCATGGCCACCCCGCTGGAGAGGGCCCAGCATCTGCAAAGCTCC	ENSG00000105329|TGFB1|14
CGGCACCGCCGAGCCCTGGACACCAACTATTGCTTCAGCTCCACGGAGAAGAACTGCTGCGTGCGGCAGCTGTACATTGACTTCCGCAAGGACCTCGGCTGGAAGTGGATCCACGAGCCC	ENSG00000105329|TGFB1|15
AAGGGCTACCATGCCAACTTCTGCCTCGGGCCCTGCCCCTACATTTGGAGCCTGGACACGCAGTACAGCAAGGTCCTGGCCCTGTACAACCAGCATAACCCGGGCGCCTCGGCGGCGCCG	ENSG00000105329|TGFB1|16
TGCTGCGTGCCGCAGGCGCTGGAGCCGCTGCCCATCGTGTACTACGTGGGCCGCAAGCCCAAGGTGGAGCAGCTGTCCAACATGATCGTGCGCTCCTGCAAGTGCAGCTGAGGTCCCGCC	ENSG00000105329|TGFB1|17
CCGCCCCGCCCCGCCCCGGCAGGCCCGGCCCCACCCCGCCCCGCCCCCGCTGCCTTGCCCATGGGGGCTGTATTTAAGGACACCCGTGCCCCAAGCCCACCTGGGGCCCCATTAAAGATG	ENSG00000105329|TGFB1|18
GAGAGAGGACTGCGGATCTCTGTGTCATTGGGCGCCTGCCTGGGGTCTCCATCCCTGACGTTCCCCCACTCCCACTCCCTCTCTCTCCCTCTCTGCCTCCTCCTGCCTGTCTGCACTATT	ENSG00000105329|TGFB1|19
CCTTTGCCCGGCATCAAGGCACAGGGGACCAGTGGGGAACACTACTGTAGTTAGATCTATTTATTGAGCACCTTGGGCACTGTTGAAGTGCCTTACATTAATGAACTCATTCAGTCACCA	ENSG00000105329|TGFB1|20
TAGCAACACTCTGAGATGCAGGGACTCTGATAACACCCATTTTAAAGGTGAGGAAACAAGCCCAGAGAGGTTAAGGGAGGAGTTCCTGCCCACCAGGAACCTGCTTTAGTGGGGGATAGT	ENSG00000105329|TGFB1|21
TGGCTCACGCCTGTAATCCTAGCACTTTTGGGAGGCAGAGATGGGAGGATTACTTGAATCCAGGCACCTATCTCTACAAAACACTTTTA	ENSG00000105329|TGFB1|22
GGGTAACATAGTGAGACCCTATCTCTACAAAACACTTTTAAAAAATGTACACCTGTGGTCCCAGCTACTCTGGAGGCTAAGGTGGGAGGATCACTTGATCCTGGGAGGTCAAGGCTGCAG	ENSG00000105329|TGFB1|23
CATCCAGGAAGTCCCCAACATCTGGCAACGTGAAGTTGGCTAGGAGGAAGGAAGTGCCCCAAAGAGAACAAGAAGAAGAGGACCCTGCATTGACGTTCCTCTGGGAAGCACTCATTTCCT	ENSG00000105329|TGFB1|24
ACCTTTCATTTCTAAGACCGCATGATCTGGGACATCCTTCCCTTCCTCGTCGGTTCGCTTTATTGTTCGGTCTTTTAGGTCCTCGTCAGTGGGACAAATTACAATAGCTTTGCGCTGGAA	ENSG00000105329|TGFB1|25
TTGTGACGTGTGTGCGTGTGTGTGTTCCCATCTGCCCCACGCCCCACTTATCTATCCCTCTGAGAGTGTGTGTGTATGTCCCCTATCCCCTGACTCCCACACCAAAGCAGGGTTCACTAC	ENSG00000105329|TGFB1|26
GGACTCTTCTCCTCCTCCACCTCCTCCTCCTCCTCCCGCGCCGCCGCCTCCTCCTCCTCTTCCTCTCCGCGCCTTCGCTACGCGCCCGGCCGCCCGAGGCAGATCCAGGCGGCGGCGGAG	ENSG00000043355|ZIC2|1
CGCCACCACCGCCGCCTGCGCCTGGAGCCCGGTGGCCGCCGGACGCACCGCGCGGATCGGGAGCGGGAGTCGAGGCGGCG	ENSG00000043355|ZIC2|2
GCGCTGGCCATGCTCCTGGACGCGGGTCCGCAGTTCCCGGCCATCGGGGTGGGCAGCTTCGCGCGCCACCATCACCACTCCGCCGCGGCGGCGGCGGCGGCTGCCGCCGAGATGCAGGAC	ENSG00000043355|ZIC2|3
CGGCGGCGGCGGCTGCCGCCGAGATGCAGGACCGTGAACTGAGCCTGGCGGCGGCGCAGAACGGCTTCGTTGACTCCGCCGCCGCGCACATGGGAGCCTTCAAGCTCAACCCGGGCGCGC	ENSG00000043355|ZIC2|4
CCTTCAAGCTCAACCCGGGCGCGCACGAGCTGTCCCCGGGCCAGAGCTCGGCGTTCACGTCGCAGGGCCCCGGCGCCTACCCCGGCTCCGCTGCGGCTGCCGCTGCGGCCGCAGCGCTCG	ENSG00000043355|ZIC2|5
CCTACTCTGGGCCGCCCTTCAACTCCACCCGGGACTTCCTGTTCCGCAGCCGCGGCTTCGGGGACTCGGCGCCGGGCGGCGGGCAGCACGGGCTGTTCGGGCCGGGCGCGGGCGGCCTGC	ENSG00000043355|ZIC2|6
ACCACGCGCACTCGGACGCGCAGGGCCACCTCCTCTTCCCGGGCCTGCCAGAGCAGCACGGGCCGCACGGCTCGCAGAATGTGCTCAACGGGCAGATGCGCCTCGGGCTGCCCGGCGAGG	ENSG00000043355|ZIC2|7
TGTTCGGGCGCTCGGAGCAATACCGCCAGGTGGCCAGCCCGCGGACCGACCCCTACTCGGCGGCGCAACTCCACAACCAGTACGGCCCCATGAATATGAACATGGGTATGAACATGGCAG	ENSG00000043355|ZIC2|8
ACCACCACCACCACCACCACCACCACCCCGGTGCCTTTTTCCGCTATATGCGGCAGCAGTGCATCAAGCAGGAGCTAATCTGCAAGTGGATCGACCCCGAGCAACTGAGCAATCCCAAGA	ENSG00000043355|ZIC2|9
GCAATCCCAAGAAGAGCTGCAACAAAACTTTCAGCACCATGCACGAGCTGGTGACACACGTCTCGGTGGAGCACGTCGGCGGCCCGGAGCAGAGCAACCACGTCTGCTTCTGGGAGGAGT	ENSG00000043355|ZIC2|10
GTCCGCGCGAGGGCAAGCCCTTCAAGGCCAAATACAAACTGGTCAACCACATCCGCGTGCACACAGGCGAGAAACCCTTCCCCTGCCCCTTCCCGGGCTGTGGCAAAGTCTTCGCGCGCT	ENSG00000043355|ZIC2|11
CCGAGAACCTCAAGATCCACAAAAGGACCCACACAGGGGAGAAGCCGTTCCAGTGTGAGTTTGAGGGCTGCGACCGGCGCTTCGCCAACAGCAGCGACAGGAAGAAGCACATGCACGTCC	ENSG00000043355|ZIC2|12
CATGAGTCCTCCCCGCAGGGCTCTGAATCCTCCCCGGCCGCCAGCTCCGGCTATGAGTCGTCCACGCCCCCGGGGCTGGTGTCCCCCAGCGCCGAGCCCCAGAGCAGCTCCAACCTGTCC	ENSG00000043355|ZIC2|13
AGTGGCGGGGGCGGCGGCGGGGCGGGCGGCGGGGGCGGCGGCAGCTCTGGCGGGGGCAGCGGGACAGCCGGGGGTCACAGCGGCCTCTCCTCCAACTTCAATGAATGGTACGTGTGACGG	ENSG00000043355|ZIC2|14
GTCGGGGCCTCTCTCCCTCTCCCTGTCCCCACCCCAGCGCAGCAGCCCTCCCCGCAGCTAGCAGCGAGGGCACCTTGTGATCATGTTGTTAAAATTATGAATCTGATTTTTATGATGATG	ENSG00000043355|ZIC2|15
AAAATTTTACCAGCAGAAGGATTTTTTAAAGTTTTTTTTTTTTTTTTAATAATAATCTAGGCATGAAGAGCAAAAATATCCCTTCCGGAGTCTTTGAAGCTGAAAATATAAAACAAATAA	ENSG00000043355|ZIC2|16
AAAATAAAAAAATAAAAACCCACAAAAATGTTGAACCAAACCTCCCTGCTAATCTCCATGCCCACGTTCTTTCCCACCCTGTTCCCAGTCTTCTGACAAACTGTGTACATAGCGGACTCC	ENSG00000043355|ZIC2|17
TCCTTTCTCCTCCGAGGTGGTTTTAAAGGCTTTTTGGTGTATAGAAGTTTGTCCATTTGTAAAACTCCGGATTGCGTTCCTCCCCGCCTTCCGCCCCTTCCCTTCCCTAAAGTGATGGGC	ENSG00000043355|ZIC2|18
TTTCTCTTTTCTCTTTTTAGTTTACCCGGTTTCTTTTTAAGTAATGTGGAAGAAAATGGTTTATTTTGTATTGTGGTATTGAATATTGTGTTCCTTTTTATGAGGCAACCTGATTGTAAA	ENSG00000043355|ZIC2|19
CTTCATGTAACTATAGACTGGAAAAAATGAGCCGTGCCAAAGTCTCCCTTCTGTTTCTTCAGCACATTGACCCATAGCACACACATACACACCACCACCAACAACGCTTGTGAATGTATT	ENSG00000043355|ZIC2|20
TTTCTGTTAGCTGGGTTTACATGTGATGTTTTAGTGCTTTTGCAAGTTCAATTTGTTAGTTCCTGTATGAAAGATTGTGGGGGAAAAATAAACGTCGTGCCGTTAGCTTTTTCCGTAATA	ENSG00000043355|ZIC2|21
ACACCCTTCCTTCTGTAAATACCCGTTACCATATTTATCCATTTGTAATTAAATTATGGTATTAACTTGCTACAGAGGAAACAATATTTATAAAGAATGTTTCTTAACTATAAATATGTA	ENSG00000043355|ZIC2|22
CAATTGTGGGCATAAACTGTTTCAGATTTTTTATTTGAAGGTTTTAAGTGGTTTGATCATTTCTTGTGATGTTTTGAGAGTAATGCATACAGAAATATAATAAAATGTGTTGAAACTGCA	ENSG00000043355|ZIC2|23
TGAAAGGCTTTGCTGACTCCCCCAACCCTCGCCCACCAGCTTGTGCCTCTCCGCAGTCACTAGATGCTGCCTTATCTCTAATATTTACCTTTTCTTCAACTTATTTTTTTAAAGACGGGA	ENSG00000043355|ZIC2|24
TGATCTTAGTTCTGCCGCAGAGGGGATCGGACTGGTTTGAGGGACCCAGCCCCCTCAGGTCCTTCTCCCTCGCCGCGGCCCAGCCCCCTCGCAGCCTGAGTGGGGGCTCTGCAGGCTCTG	ENSG00000043355|ZIC2|25

## Sheet: Focused_Screen_sgRNA
Target	sgName	seq	position(hg19)
NC_Blank	NC_Blank	GAGACGGGATACCGTCTCT
TBXEnh1	TBXEnh1:1	GCTCCCAAGGAAGAAGAGT	GTGGAAAGGACGAAACACCGGCTCCCAAGGAAGAAGAGTGTTTTAGAGCTAGGCCAACATGAGGATCAC	chr12:114853293-114853312
TBXEnh1	TBXEnh1:2	GAGGACAACGAGGGCTGGG	GTGGAAAGGACGAAACACCGGAGGACAACGAGGGCTGGGGTTTTAGAGCTAGGCCAACATGAGGATCAC	chr12:114853441-114853460
TBXEnh1	TBXEnh1:3	AGAACAGCACCCGCCAGGA	GTGGAAAGGACGAAACACCGAGAACAGCACCCGCCAGGAGTTTTAGAGCTAGGCCAACATGAGGATCAC	chr12:114853548-114853567
TBXEnh1	TBXEnh1:4	TGGGAATTCACCGATGACG	GTGGAAAGGACGAAACACCGTGGGAATTCACCGATGACGGTTTTAGAGCTAGGCCAACATGAGGATCAC	chr12:114853650-114853669
TBXEnh1	TBXEnh1:5	ACAGACACGCACAACTTCC	GTGGAAAGGACGAAACACCGACAGACACGCACAACTTCCGTTTTAGAGCTAGGCCAACATGAGGATCAC	chr12:114853773-114853792
TBXEnh1	TBXEnh1:6	GCCTTAGAGCCCGGCCGCT	GTGGAAAGGACGAAACACCGGCCTTAGAGCCCGGCCGCTGTTTTAGAGCTAGGCCAACATGAGGATCAC	chr12:114853932-114853951
TBXEnh1	TBXEnh1:7	AACAGCCCCTACCTCCCAG	GTGGAAAGGACGAAACACCGAACAGCCCCTACCTCCCAGGTTTTAGAGCTAGGCCAACATGAGGATCAC	chr12:114854055-114854074
TBXEnh1	TBXEnh1:8	GCAGGGGGACCCGCGGGCA	GTGGAAAGGACGAAACACCGGCAGGGGGACCCGCGGGCAGTTTTAGAGCTAGGCCAACATGAGGATCAC	chr12:114854241-114854260
TBXEnh2	TBXEnh2:1	GAAAATCAAATTCACAGGC	GTGGAAAGGACGAAACACCGGAAAATCAAATTCACAGGCGTTTTAGAGCTAGGCCAACATGAGGATCAC	chr15:90734612-90734631
TBXEnh2	TBXEnh2:2	TTAAAGAGACACGACTGGC	GTGGAAAGGACGAAACACCGTTAAAGAGACACGACTGGCGTTTTAGAGCTAGGCCAACATGAGGATCAC	chr15:90734745-90734764
TBXEnh2	TBXEnh2:3	ACAACAGGCCGATAGTGTC	GTGGAAAGGACGAAACACCGACAACAGGCCGATAGTGTCGTTTTAGAGCTAGGCCAACATGAGGATCAC	chr15:90734910-90734929
TBXEnh2	TBXEnh2:4	GCCTGACCTGGAGATGCTG	GTGGAAAGGACGAAACACCGGCCTGACCTGGAGATGCTGGTTTTAGAGCTAGGCCAACATGAGGATCAC	chr15:90735035-90735054
TBXEnh2	TBXEnh2:5	AAGGCGTCCCTGCTCTTTG	GTGGAAAGGACGAAACACCGAAGGCGTCCCTGCTCTTTGGTTTTAGAGCTAGGCCAACATGAGGATCAC	chr15:90735105-90735124
TBXEnh2	TBXEnh2:6	TCAGGGTTGAGCTAAAAAC	GTGGAAAGGACGAAACACCGTCAGGGTTGAGCTAAAAACGTTTTAGAGCTAGGCCAACATGAGGATCAC	chr15:90735261-90735280
TBXEnh2	TBXEnh2:7	GACAAGTTGCAGTTTCAAG	GTGGAAAGGACGAAACACCGGACAAGTTGCAGTTTCAAGGTTTTAGAGCTAGGCCAACATGAGGATCAC	chr15:90735368-90735387
TBXEnh2	TBXEnh2:8	GCTCACTCTCTCTATCTTG	GTGGAAAGGACGAAACACCGGCTCACTCTCTCTATCTTGGTTTTAGAGCTAGGCCAACATGAGGATCAC	chr15:90735497-90735516
TBXEnh3	TBXEnh3:1	ACAGCCGGTTCCAAACACA	GTGGAAAGGACGAAACACCGACAGCCGGTTCCAAACACAGTTTTAGAGCTAGGCCAACATGAGGATCAC	chr16:57302650-57302669
TBXEnh3	TBXEnh3:2	AAATGTCACAGGGCCAGGC	GTGGAAAGGACGAAACACCGAAATGTCACAGGGCCAGGCGTTTTAGAGCTAGGCCAACATGAGGATCAC	chr16:57302774-57302793
TBXEnh3	TBXEnh3:3	GGAAGTCAGATAGTGGGGC	GTGGAAAGGACGAAACACCGGGAAGTCAGATAGTGGGGCGTTTTAGAGCTAGGCCAACATGAGGATCAC	chr16:57302854-57302873
TBXEnh3	TBXEnh3:4	CATTAAGTGATAACTCCAT	GTGGAAAGGACGAAACACCGCATTAAGTGATAACTCCATGTTTTAGAGCTAGGCCAACATGAGGATCAC	chr16:57302927-57302946
TBXEnh3	TBXEnh3:5	GCCGAGGTTTCCTTCCAGT	GTGGAAAGGACGAAACACCGGCCGAGGTTTCCTTCCAGTGTTTTAGAGCTAGGCCAACATGAGGATCAC	chr16:57303045-57303064
TBXEnh3	TBXEnh3:6	ACAGGGAACATTCCAACCG	GTGGAAAGGACGAAACACCGACAGGGAACATTCCAACCGGTTTTAGAGCTAGGCCAACATGAGGATCAC	chr16:57303141-57303160
TBXEnh3	TBXEnh3:7	GTGAATGGGGTATGCACCC	GTGGAAAGGACGAAACACCGGTGAATGGGGTATGCACCCGTTTTAGAGCTAGGCCAACATGAGGATCAC	chr16:57303217-57303236
TBXEnh3	TBXEnh3:8	GATTTGGAAACCAACACTG	GTGGAAAGGACGAAACACCGGATTTGGAAACCAACACTGGTTTTAGAGCTAGGCCAACATGAGGATCAC	chr16:57303266-57303285
TBXEnh4	TBXEnh4:1	TCAAGCAGATGTCATCTTG	GTGGAAAGGACGAAACACCGTCAAGCAGATGTCATCTTGGTTTTAGAGCTAGGCCAACATGAGGATCAC	chr20:1305690-1305709
TBXEnh4	TBXEnh4:2	AGATGTAAGTCATTCACCA	GTGGAAAGGACGAAACACCGAGATGTAAGTCATTCACCAGTTTTAGAGCTAGGCCAACATGAGGATCAC	chr20:1305786-1305805
TBXEnh4	TBXEnh4:3	AGGAGGTACTGGGTAGAGC	GTGGAAAGGACGAAACACCGAGGAGGTACTGGGTAGAGCGTTTTAGAGCTAGGCCAACATGAGGATCAC	chr20:1305890-1305909
TBXEnh4	TBXEnh4:4	AACGCTGTCTTACAAACCC	GTGGAAAGGACGAAACACCGAACGCTGTCTTACAAACCCGTTTTAGAGCTAGGCCAACATGAGGATCAC	chr20:1305958-1305977
TBXEnh4	TBXEnh4:5	TGGCATTTGTCAAAGGAAG	GTGGAAAGGACGAAACACCGTGGCATTTGTCAAAGGAAGGTTTTAGAGCTAGGCCAACATGAGGATCAC	chr20:1305998-1306017
TBXEnh4	TBXEnh4:6	AGCAGTGTCCACTTTGGGA	GTGGAAAGGACGAAACACCGAGCAGTGTCCACTTTGGGAGTTTTAGAGCTAGGCCAACATGAGGATCAC	chr20:1306049-1306068
TBXEnh4	TBXEnh4:7	TCAGGCCCAGCCTTCGGGG	GTGGAAAGGACGAAACACCGTCAGGCCCAGCCTTCGGGGGTTTTAGAGCTAGGCCAACATGAGGATCAC	chr20:1306217-1306236
TBXEnh4	TBXEnh4:8	GAGGCAGCACTGCTACAGG	GTGGAAAGGACGAAACACCGGAGGCAGCACTGCTACAGGGTTTTAGAGCTAGGCCAACATGAGGATCAC	chr20:1306398-1306417
TBXEnh5	TBXEnh5:1	GTTGCCAACATTACAGGGA	GTGGAAAGGACGAAACACCGGTTGCCAACATTACAGGGAGTTTTAGAGCTAGGCCAACATGAGGATCAC	chr20:42780215-42780234
TBXEnh5	TBXEnh5:2	TTAGACACACTATAGCTCT	GTGGAAAGGACGAAACACCGTTAGACACACTATAGCTCTGTTTTAGAGCTAGGCCAACATGAGGATCAC	chr20:42780294-42780313
TBXEnh5	TBXEnh5:3	CTATAATTACCGTCATCTT	GTGGAAAGGACGAAACACCGCTATAATTACCGTCATCTTGTTTTAGAGCTAGGCCAACATGAGGATCAC	chr20:42780349-42780368
TBXEnh5	TBXEnh5:4	GTTTGACAAGATACCTGTG	GTGGAAAGGACGAAACACCGGTTTGACAAGATACCTGTGGTTTTAGAGCTAGGCCAACATGAGGATCAC	chr20:42780382-42780401
TBXEnh5	TBXEnh5:5	TATACCCCCATCTCATGTC	GTGGAAAGGACGAAACACCGTATACCCCCATCTCATGTCGTTTTAGAGCTAGGCCAACATGAGGATCAC	chr20:42780484-42780503
TBXEnh5	TBXEnh5:6	CTGGGCTTTGACATACACT	GTGGAAAGGACGAAACACCGCTGGGCTTTGACATACACTGTTTTAGAGCTAGGCCAACATGAGGATCAC	chr20:42780604-42780623
TBXEnh5	TBXEnh5:7	CTCTCTCAAGTTCCGAGGT	GTGGAAAGGACGAAACACCGCTCTCTCAAGTTCCGAGGTGTTTTAGAGCTAGGCCAACATGAGGATCAC	chr20:42780751-42780770
TBXEnh5	TBXEnh5:8	ACTGGGGAAATCCTTATCA	GTGGAAAGGACGAAACACCGACTGGGGAAATCCTTATCAGTTTTAGAGCTAGGCCAACATGAGGATCAC	chr20:42780832-42780851
TBXEnh6	TBXEnh6:1	TGCCCCCCCCTCCTTTTAT	GTGGAAAGGACGAAACACCGTGCCCCCCCCTCCTTTTATGTTTTAGAGCTAGGCCAACATGAGGATCAC	chr7:4835895-4835914
TBXEnh6	TBXEnh6:2	ATATAGACTCGGGTGGCCC	GTGGAAAGGACGAAACACCGATATAGACTCGGGTGGCCCGTTTTAGAGCTAGGCCAACATGAGGATCAC	chr7:4835941-4835960
TBXEnh6	TBXEnh6:3	CCCTGTCCCCGAGCACGCA	GTGGAAAGGACGAAACACCGCCCTGTCCCCGAGCACGCAGTTTTAGAGCTAGGCCAACATGAGGATCAC	chr7:4835985-4836004
TBXEnh6	TBXEnh6:4	TGCCTCCAATACTGCAAAG	GTGGAAAGGACGAAACACCGTGCCTCCAATACTGCAAAGGTTTTAGAGCTAGGCCAACATGAGGATCAC	chr7:4836015-4836034
TBXEnh6	TBXEnh6:5	TCCCCGGGCACACACCTCC	GTGGAAAGGACGAAACACCGTCCCCGGGCACACACCTCCGTTTTAGAGCTAGGCCAACATGAGGATCAC	chr7:4836046-4836065
TBXEnh6	TBXEnh6:6	CTGTGAACCCTCGGGGACA	GTGGAAAGGACGAAACACCGCTGTGAACCCTCGGGGACAGTTTTAGAGCTAGGCCAACATGAGGATCAC	chr7:4836174-4836193
TBXEnh6	TBXEnh6:7	CCTAGGCTAGGTAAAGACC	GTGGAAAGGACGAAACACCGCCTAGGCTAGGTAAAGACCGTTTTAGAGCTAGGCCAACATGAGGATCAC	chr7:4836229-4836248
TBXEnh6	TBXEnh6:8	ATCTCACTGCTTGACCCCT	GTGGAAAGGACGAAACACCGATCTCACTGCTTGACCCCTGTTTTAGAGCTAGGCCAACATGAGGATCAC	chr7:4836300-4836319

## Sheet: Focused_Screen_Filt_sgRNA
Target	sgName	seq	position(hg19)
NC_Blank	NC_Blank	GAGACGGGATACCGTCTCT
TBXEnh1	TBXEnh1:2	GAGGACAACGAGGGCTGGG	chr12:114853441-114853460
TBXEnh1	TBXEnh1:3	AGAACAGCACCCGCCAGGA	chr12:114853548-114853567
TBXEnh1	TBXEnh1:4	TGGGAATTCACCGATGACG	chr12:114853650-114853669
TBXEnh1	TBXEnh1:5	ACAGACACGCACAACTTCC	chr12:114853773-114853792
TBXEnh1	TBXEnh1:6	GCCTTAGAGCCCGGCCGCT	chr12:114853932-114853951
TBXEnh1	TBXEnh1:7	AACAGCCCCTACCTCCCAG	chr12:114854055-114854074
TBXEnh2	TBXEnh2:3	ACAACAGGCCGATAGTGTC	chr15:90734910-90734929
TBXEnh2	TBXEnh2:4	GCCTGACCTGGAGATGCTG	chr15:90735035-90735054
TBXEnh2	TBXEnh2:5	AAGGCGTCCCTGCTCTTTG	chr15:90735105-90735124
TBXEnh2	TBXEnh2:6	TCAGGGTTGAGCTAAAAAC	chr15:90735261-90735280
TBXEnh2	TBXEnh2:7	GACAAGTTGCAGTTTCAAG	chr15:90735368-90735387
TBXEnh2	TBXEnh2:8	GCTCACTCTCTCTATCTTG	chr15:90735497-90735516
TBXEnh3	TBXEnh3:2	AAATGTCACAGGGCCAGGC	chr16:57302774-57302793
TBXEnh3	TBXEnh3:3	GGAAGTCAGATAGTGGGGC	chr16:57302854-57302873
TBXEnh3	TBXEnh3:4	CATTAAGTGATAACTCCAT	chr16:57302927-57302946
TBXEnh3	TBXEnh3:5	GCCGAGGTTTCCTTCCAGT	chr16:57303045-57303064
TBXEnh3	TBXEnh3:6	ACAGGGAACATTCCAACCG	chr16:57303141-57303160
TBXEnh3	TBXEnh3:7	GTGAATGGGGTATGCACCC	chr16:57303217-57303236
TBXEnh3	TBXEnh3:8	GATTTGGAAACCAACACTG	chr16:57303266-57303285
TBXEnh4	TBXEnh4:3	AGGAGGTACTGGGTAGAGC	chr20:1305890-1305909
TBXEnh4	TBXEnh4:4	AACGCTGTCTTACAAACCC	chr20:1305958-1305977
TBXEnh4	TBXEnh4:5	TGGCATTTGTCAAAGGAAG	chr20:1305998-1306017
TBXEnh4	TBXEnh4:6	AGCAGTGTCCACTTTGGGA	chr20:1306049-1306068
TBXEnh4	TBXEnh4:7	TCAGGCCCAGCCTTCGGGG	chr20:1306217-1306236
TBXEnh4	TBXEnh4:8	GAGGCAGCACTGCTACAGG	chr20:1306398-1306417
TBXEnh5	TBXEnh5:1	GTTGCCAACATTACAGGGA	chr20:42780215-42780234
TBXEnh5	TBXEnh5:2	TTAGACACACTATAGCTCT	chr20:42780294-42780313
TBXEnh5	TBXEnh5:3	CTATAATTACCGTCATCTT	chr20:42780349-42780368
TBXEnh5	TBXEnh5:5	TATACCCCCATCTCATGTC	chr20:42780484-42780503
TBXEnh5	TBXEnh5:6	CTGGGCTTTGACATACACT	chr20:42780604-42780623
TBXEnh5	TBXEnh5:7	CTCTCTCAAGTTCCGAGGT	chr20:42780751-42780770
TBXEnh6	TBXEnh6:1	TGCCCCCCCCTCCTTTTAT	chr7:4835895-4835914
TBXEnh6	TBXEnh6:2	ATATAGACTCGGGTGGCCC	chr7:4835941-4835960
TBXEnh6	TBXEnh6:4	TGCCTCCAATACTGCAAAG	chr7:4836015-4836034
TBXEnh6	TBXEnh6:5	TCCCCGGGCACACACCTCC	chr7:4836046-4836065
TBXEnh6	TBXEnh6:6	CTGTGAACCCTCGGGGACA	chr7:4836174-4836193
TBXEnh6	TBXEnh6:8	ATCTCACTGCTTGACCCCT	chr7:4836300-4836319

## Sheet: Initial_Screen_sgRNA_List
Target	sgName	seq	oligo	position(hg19)
MALAT1	MALAT1	GCGCTGCGCTTAAGAGGGC	GTGGAAAGGACGAAACACCGGCGCTGCGCTTAAGAGGGCGTTTTAGAGCTAGGCCAACATGAGGATCAC	chr11:65265266-65265285
NC:1	NC:1	GTTCCGCGTTACATAACTTA	GTGGAAAGGACGAAACACCGGTTCCGCGTTACATAACTTAGTTTTAGAGCTAGGCCAACATGAGGATCAC	na
NC:2	NC:2	TGTGAGTTAGCTCACTCATT	GTGGAAAGGACGAAACACCGTGTGAGTTAGCTCACTCATTGTTTTAGAGCTAGGCCAACATGAGGATCAC	na
NC:3	NC:3	GGAGCGCACCATCTTCTTCA	GTGGAAAGGACGAAACACCGGGAGCGCACCATCTTCTTCAGTTTTAGAGCTAGGCCAACATGAGGATCAC	na
NC:4	NC:4	GTGAACCGCATCGAGCTGAA	GTGGAAAGGACGAAACACCGGTGAACCGCATCGAGCTGAAGTTTTAGAGCTAGGCCAACATGAGGATCAC	na
NC:5	NC:5	GTCCAAGCATGAGCAGTTC	GTGGAAAGGACGAAACACCGGTCCAAGCATGAGCAGTTCGTTTTAGAGCTAGGCCAACATGAGGATCAC	na
TBXEnh1	TBXEnh1:1	GCTCCCAAGGAAGAAGAGT	GTGGAAAGGACGAAACACCGGCTCCCAAGGAAGAAGAGTGTTTTAGAGCTAGGCCAACATGAGGATCAC	chr12:114371023-114371042
TBXEnh1	TBXEnh1:2	GAGGACAACGAGGGCTGGG	GTGGAAAGGACGAAACACCGGAGGACAACGAGGGCTGGGGTTTTAGAGCTAGGCCAACATGAGGATCAC	chr12:114371080-114371099
TBXEnh1	TBXEnh1:3	AGAACAGCACCCGCCAGGA	GTGGAAAGGACGAAACACCGAGAACAGCACCCGCCAGGAGTTTTAGAGCTAGGCCAACATGAGGATCAC	chr12:114371179-114371198
TBXEnh1	TBXEnh1:4	TGGGAATTCACCGATGACG	GTGGAAAGGACGAAACACCGTGGGAATTCACCGATGACGGTTTTAGAGCTAGGCCAACATGAGGATCAC	chr12:114371257-114371276
TBXEnh1	TBXEnh1:5	ACAGACACGCACAACTTCC	GTGGAAAGGACGAAACACCGACAGACACGCACAACTTCCGTTTTAGAGCTAGGCCAACATGAGGATCAC	chr12:114371303-114371322
TBXEnh1	TBXEnh1:6	GCCTTAGAGCCCGGCCGCT	GTGGAAAGGACGAAACACCGGCCTTAGAGCCCGGCCGCTGTTTTAGAGCTAGGCCAACATGAGGATCAC	chr12:114371339-114371358
TBXEnh1	TBXEnh1:7	AACAGCCCCTACCTCCCAG	GTGGAAAGGACGAAACACCGAACAGCCCCTACCTCCCAGGTTTTAGAGCTAGGCCAACATGAGGATCAC	chr12:114371401-114371420
TBXEnh1	TBXEnh1:8	GCAGGGGGACCCGCGGGCA	GTGGAAAGGACGAAACACCGGCAGGGGGACCCGCGGGCAGTTTTAGAGCTAGGCCAACATGAGGATCAC	chr12:114371456-114371475
TBXEnh2	TBXEnh2:1	GAAAATCAAATTCACAGGC	GTGGAAAGGACGAAACACCGGAAAATCAAATTCACAGGCGTTTTAGAGCTAGGCCAACATGAGGATCAC	chr12:114773383-114773402
TBXEnh2	TBXEnh2:2	TTAAAGAGACACGACTGGC	GTGGAAAGGACGAAACACCGTTAAAGAGACACGACTGGCGTTTTAGAGCTAGGCCAACATGAGGATCAC	chr12:114773438-114773457
TBXEnh2	TBXEnh2:3	ACAACAGGCCGATAGTGTC	GTGGAAAGGACGAAACACCGACAACAGGCCGATAGTGTCGTTTTAGAGCTAGGCCAACATGAGGATCAC	chr12:114773491-114773510
TBXEnh2	TBXEnh2:4	GCCTGACCTGGAGATGCTG	GTGGAAAGGACGAAACACCGGCCTGACCTGGAGATGCTGGTTTTAGAGCTAGGCCAACATGAGGATCAC	chr12:114773545-114773564
TBXEnh2	TBXEnh2:5	AAGGCGTCCCTGCTCTTTG	GTGGAAAGGACGAAACACCGAAGGCGTCCCTGCTCTTTGGTTTTAGAGCTAGGCCAACATGAGGATCAC	chr12:114773620-114773639
TBXEnh2	TBXEnh2:6	TCAGGGTTGAGCTAAAAAC	GTGGAAAGGACGAAACACCGTCAGGGTTGAGCTAAAAACGTTTTAGAGCTAGGCCAACATGAGGATCAC	chr12:114773687-114773706
TBXEnh2	TBXEnh2:7	GACAAGTTGCAGTTTCAAG	GTGGAAAGGACGAAACACCGGACAAGTTGCAGTTTCAAGGTTTTAGAGCTAGGCCAACATGAGGATCAC	chr12:114773771-114773790
TBXEnh2	TBXEnh2:8	GCTCACTCTCTCTATCTTG	GTGGAAAGGACGAAACACCGGCTCACTCTCTCTATCTTGGTTTTAGAGCTAGGCCAACATGAGGATCAC	chr12:114773822-114773841
TBXEnh3	TBXEnh3:1	ACAGCCGGTTCCAAACACA	GTGGAAAGGACGAAACACCGACAGCCGGTTCCAAACACAGTTTTAGAGCTAGGCCAACATGAGGATCAC	chr12:114799377-114799396
TBXEnh3	TBXEnh3:2	AAATGTCACAGGGCCAGGC	GTGGAAAGGACGAAACACCGAAATGTCACAGGGCCAGGCGTTTTAGAGCTAGGCCAACATGAGGATCAC	chr12:114799412-114799431
TBXEnh3	TBXEnh3:3	GGAAGTCAGATAGTGGGGC	GTGGAAAGGACGAAACACCGGGAAGTCAGATAGTGGGGCGTTTTAGAGCTAGGCCAACATGAGGATCAC	chr12:114799479-114799498
TBXEnh3	TBXEnh3:4	CATTAAGTGATAACTCCAT	GTGGAAAGGACGAAACACCGCATTAAGTGATAACTCCATGTTTTAGAGCTAGGCCAACATGAGGATCAC	chr12:114799525-114799544
TBXEnh3	TBXEnh3:5	GCCGAGGTTTCCTTCCAGT	GTGGAAAGGACGAAACACCGGCCGAGGTTTCCTTCCAGTGTTTTAGAGCTAGGCCAACATGAGGATCAC	chr12:114799553-114799572
TBXEnh3	TBXEnh3:6	ACAGGGAACATTCCAACCG	GTGGAAAGGACGAAACACCGACAGGGAACATTCCAACCGGTTTTAGAGCTAGGCCAACATGAGGATCAC	chr12:114799650-114799669
TBXEnh3	TBXEnh3:7	GTGAATGGGGTATGCACCC	GTGGAAAGGACGAAACACCGGTGAATGGGGTATGCACCCGTTTTAGAGCTAGGCCAACATGAGGATCAC	chr12:114799744-114799763
TBXEnh3	TBXEnh3:8	GATTTGGAAACCAACACTG	GTGGAAAGGACGAAACACCGGATTTGGAAACCAACACTGGTTTTAGAGCTAGGCCAACATGAGGATCAC	chr12:114799836-114799855
TBXEnh4	TBXEnh4:1	TCAAGCAGATGTCATCTTG	GTGGAAAGGACGAAACACCGTCAAGCAGATGTCATCTTGGTTTTAGAGCTAGGCCAACATGAGGATCAC	chr12:114463741-114463760
TBXEnh4	TBXEnh4:2	AGATGTAAGTCATTCACCA	GTGGAAAGGACGAAACACCGAGATGTAAGTCATTCACCAGTTTTAGAGCTAGGCCAACATGAGGATCAC	chr12:114463774-114463793
TBXEnh4	TBXEnh4:3	AGGAGGTACTGGGTAGAGC	GTGGAAAGGACGAAACACCGAGGAGGTACTGGGTAGAGCGTTTTAGAGCTAGGCCAACATGAGGATCAC	chr12:114463805-114463824
TBXEnh4	TBXEnh4:4	AACGCTGTCTTACAAACCC	GTGGAAAGGACGAAACACCGAACGCTGTCTTACAAACCCGTTTTAGAGCTAGGCCAACATGAGGATCAC	chr12:114463842-114463861
TBXEnh4	TBXEnh4:5	TGGCATTTGTCAAAGGAAG	GTGGAAAGGACGAAACACCGTGGCATTTGTCAAAGGAAGGTTTTAGAGCTAGGCCAACATGAGGATCAC	chr12:114463874-114463893
TBXEnh4	TBXEnh4:6	AGCAGTGTCCACTTTGGGA	GTGGAAAGGACGAAACACCGAGCAGTGTCCACTTTGGGAGTTTTAGAGCTAGGCCAACATGAGGATCAC	chr12:114463919-114463938
TBXEnh4	TBXEnh4:7	TCAGGCCCAGCCTTCGGGG	GTGGAAAGGACGAAACACCGTCAGGCCCAGCCTTCGGGGGTTTTAGAGCTAGGCCAACATGAGGATCAC	chr12:114463965-114463984
TBXEnh4	TBXEnh4:8	GAGGCAGCACTGCTACAGG	GTGGAAAGGACGAAACACCGGAGGCAGCACTGCTACAGGGTTTTAGAGCTAGGCCAACATGAGGATCAC	chr12:114464027-114464046
TBXEnh5	TBXEnh5:1	GTTGCCAACATTACAGGGA	GTGGAAAGGACGAAACACCGGTTGCCAACATTACAGGGAGTTTTAGAGCTAGGCCAACATGAGGATCAC	chr12:114701282-114701301
TBXEnh5	TBXEnh5:2	TTAGACACACTATAGCTCT	GTGGAAAGGACGAAACACCGTTAGACACACTATAGCTCTGTTTTAGAGCTAGGCCAACATGAGGATCAC	chr12:114701678-114701697
TBXEnh5	TBXEnh5:3	CTATAATTACCGTCATCTT	GTGGAAAGGACGAAACACCGCTATAATTACCGTCATCTTGTTTTAGAGCTAGGCCAACATGAGGATCAC	chr12:114701908-114701927
TBXEnh5	TBXEnh5:4	GTTTGACAAGATACCTGTG	GTGGAAAGGACGAAACACCGGTTTGACAAGATACCTGTGGTTTTAGAGCTAGGCCAACATGAGGATCAC	chr12:114702349-114702368
TBXEnh5	TBXEnh5:5	TATACCCCCATCTCATGTC	GTGGAAAGGACGAAACACCGTATACCCCCATCTCATGTCGTTTTAGAGCTAGGCCAACATGAGGATCAC	chr12:114702756-114702775
TBXEnh5	TBXEnh5:6	CTGGGCTTTGACATACACT	GTGGAAAGGACGAAACACCGCTGGGCTTTGACATACACTGTTTTAGAGCTAGGCCAACATGAGGATCAC	chr12:114703714-114703733
TBXEnh5	TBXEnh5:7	CTCTCTCAAGTTCCGAGGT	GTGGAAAGGACGAAACACCGCTCTCTCAAGTTCCGAGGTGTTTTAGAGCTAGGCCAACATGAGGATCAC	chr12:114704275-114704294
TBXEnh5	TBXEnh5:8	ACTGGGGAAATCCTTATCA	GTGGAAAGGACGAAACACCGACTGGGGAAATCCTTATCAGTTTTAGAGCTAGGCCAACATGAGGATCAC	chr12:114704579-114704598
TBXEnh6	TBXEnh6:1	TGCCCCCCCCTCCTTTTAT	GTGGAAAGGACGAAACACCGTGCCCCCCCCTCCTTTTATGTTTTAGAGCTAGGCCAACATGAGGATCAC	chr12:114853293-114853312
TBXEnh6	TBXEnh6:2	ATATAGACTCGGGTGGCCC	GTGGAAAGGACGAAACACCGATATAGACTCGGGTGGCCCGTTTTAGAGCTAGGCCAACATGAGGATCAC	chr12:114853441-114853460
TBXEnh6	TBXEnh6:3	CCCTGTCCCCGAGCACGCA	GTGGAAAGGACGAAACACCGCCCTGTCCCCGAGCACGCAGTTTTAGAGCTAGGCCAACATGAGGATCAC	chr12:114853548-114853567
TBXEnh6	TBXEnh6:4	TGCCTCCAATACTGCAAAG	GTGGAAAGGACGAAACACCGTGCCTCCAATACTGCAAAGGTTTTAGAGCTAGGCCAACATGAGGATCAC	chr12:114853650-114853669
TBXEnh6	TBXEnh6:5	TCCCCGGGCACACACCTCC	GTGGAAAGGACGAAACACCGTCCCCGGGCACACACCTCCGTTTTAGAGCTAGGCCAACATGAGGATCAC	chr12:114853773-114853792
TBXEnh6	TBXEnh6:6	CTGTGAACCCTCGGGGACA	GTGGAAAGGACGAAACACCGCTGTGAACCCTCGGGGACAGTTTTAGAGCTAGGCCAACATGAGGATCAC	chr12:114853932-114853951
TBXEnh6	TBXEnh6:7	CCTAGGCTAGGTAAAGACC	GTGGAAAGGACGAAACACCGCCTAGGCTAGGTAAAGACCGTTTTAGAGCTAGGCCAACATGAGGATCAC	chr12:114854055-114854074
TBXEnh6	TBXEnh6:8	ATCTCACTGCTTGACCCCT	GTGGAAAGGACGAAACACCGATCTCACTGCTTGACCCCTGTTTTAGAGCTAGGCCAACATGAGGATCAC	chr12:114854241-114854260
TBX5_AS1_P1	TBX5_AS1_P1:1	AATAAAGACATAAACCAACC	GTGGAAAGGACGAAACACCGAATAAAGACATAAACCAACCGTTTTAGAGCTAGGCCAACATGAGGATCAC	chr12:114845771-114845791
TBX5_AS1_P1	TBX5_AS1_P1:2	GATCGACTTTCTTAGGAAGG	GTGGAAAGGACGAAACACCGGATCGACTTTCTTAGGAAGGGTTTTAGAGCTAGGCCAACATGAGGATCAC	chr12:114845602-114845622
TBX5_AS1_P1	TBX5_AS1_P1:3	AGGAAATCGAGTTGTTCCGG	GTGGAAAGGACGAAACACCGAGGAAATCGAGTTGTTCCGGGTTTTAGAGCTAGGCCAACATGAGGATCAC	chr12:114845631-114845651
TBX5_AS1_P1	TBX5_AS1_P1:4	TATTATTTTTAAATCCCCCG	GTGGAAAGGACGAAACACCGTATTATTTTTAAATCCCCCGGTTTTAGAGCTAGGCCAACATGAGGATCAC	chr12:114845745-114845765
TBX5_AS1_P1	TBX5_AS1_P1:5	GTTCTCCGTAATGTGCCTTG	GTGGAAAGGACGAAACACCGGTTCTCCGTAATGTGCCTTGGTTTTAGAGCTAGGCCAACATGAGGATCAC	chr12:114845390-114845410
TBX5_AS1_P2	TBX5_AS1_P2:1	TATTGTACCAGGGCCCGCCG	GTGGAAAGGACGAAACACCGTATTGTACCAGGGCCCGCCGGTTTTAGAGCTAGGCCAACATGAGGATCAC	chr12:114843931-114843951
TBX5_AS1_P2	TBX5_AS1_P2:2	ACAATTTCTAAGCAGCGCAG	GTGGAAAGGACGAAACACCGACAATTTCTAAGCAGCGCAGGTTTTAGAGCTAGGCCAACATGAGGATCAC	chr12:114843472-114843492
TBX5_AS1_P2	TBX5_AS1_P2:3	TACCGCGTAGACGCCCCTGG	GTGGAAAGGACGAAACACCGTACCGCGTAGACGCCCCTGGGTTTTAGAGCTAGGCCAACATGAGGATCAC	chr12:114843540-114843560
TBX5_AS1_P2	TBX5_AS1_P2:4	GAATCGAACCCCGAAGCTGG	GTGGAAAGGACGAAACACCGGAATCGAACCCCGAAGCTGGGTTTTAGAGCTAGGCCAACATGAGGATCAC	chr12:114843449-114843469
TBX5_AS1_P2	TBX5_AS1_P2:5	GAGCCAAGGTCAGGCCCGCG	GTGGAAAGGACGAAACACCGGAGCCAAGGTCAGGCCCGCGGTTTTAGAGCTAGGCCAACATGAGGATCAC	chr12:114843585-114843605
TBX5_P1	TBX5_P1:1	CAAACCAACCTTGAGCTGGG	GTGGAAAGGACGAAACACCGCAAACCAACCTTGAGCTGGGGTTTTAGAGCTAGGCCAACATGAGGATCAC	chr12:114846047-114846067
TBX5_P1	TBX5_P1:2	GGAGGTGAGTTTCACCCTGG	GTGGAAAGGACGAAACACCGGGAGGTGAGTTTCACCCTGGGTTTTAGAGCTAGGCCAACATGAGGATCAC	chr12:114846120-114846140
TBX5_P1	TBX5_P1:3	TTGCGCTCCAAAGAAGAGGT	GTGGAAAGGACGAAACACCGTTGCGCTCCAAAGAAGAGGTGTTTTAGAGCTAGGCCAACATGAGGATCAC	chr12:114846199-114846219
TBX5_P1	TBX5_P1:4	GTGCTCTTCTTGACAGACGT	GTGGAAAGGACGAAACACCGGTGCTCTTCTTGACAGACGTGTTTTAGAGCTAGGCCAACATGAGGATCAC	chr12:114846266-114846286
TBX5_P1	TBX5_P1:5	TCATTGAGCACAGATGGTCT	GTGGAAAGGACGAAACACCGTCATTGAGCACAGATGGTCTGTTTTAGAGCTAGGCCAACATGAGGATCAC	chr12:114846424-114846444
TBX5_P2	TBX5_P2:1	TCAGTACTTTGTGAGCATCG	GTGGAAAGGACGAAACACCGTCAGTACTTTGTGAGCATCGGTTTTAGAGCTAGGCCAACATGAGGATCAC	chr12:114846560-114846580
TBX5_P2	TBX5_P2:2	GCTCCTAGCAGGGAAGCCGG	GTGGAAAGGACGAAACACCGGCTCCTAGCAGGGAAGCCGGGTTTTAGAGCTAGGCCAACATGAGGATCAC	chr12:114846646-114846666
TBX5_P2	TBX5_P2:3	TTACTGCTTACCCAGAATAG	GTGGAAAGGACGAAACACCGTTACTGCTTACCCAGAATAGGTTTTAGAGCTAGGCCAACATGAGGATCAC	chr12:114846727-114846747
TBX5_P2	TBX5_P2:4	AGAGGATGTGGTGAATGCAC	GTGGAAAGGACGAAACACCGAGAGGATGTGGTGAATGCACGTTTTAGAGCTAGGCCAACATGAGGATCAC	chr12:114846869-114846889
TBX5_P2	TBX5_P2:5	ACCTACCGCTGGAGCCTCCG	GTGGAAAGGACGAAACACCGACCTACCGCTGGAGCCTCCGGTTTTAGAGCTAGGCCAACATGAGGATCAC	chr12:114847015-114847035
NGFRAP1	NGFRAP1:1	AGGAATTCAGGGGCTACGT	GTGGAAAGGACGAAACACCGAGGAATTCAGGGGCTACGTGTTTTAGAGCTAGGCCAACATGAGGATCAC	chrX:102631010-102631029
NGFRAP1	NGFRAP1:2	GCCAAGGCCTGAAGTGAGA	GTGGAAAGGACGAAACACCGGCCAAGGCCTGAAGTGAGAGTTTTAGAGCTAGGCCAACATGAGGATCAC	chrX:102631126-102631146
NGFRAP1	NGFRAP1:3	GTTGGAGTTTGCCCTCCTC	GTGGAAAGGACGAAACACCGGTTGGAGTTTGCCCTCCTCGTTTTAGAGCTAGGCCAACATGAGGATCAC	chrX:102631188-102631207
NGFRAP1	NGFRAP1:4	AGGACCGAGAAGAGTGACA	GTGGAAAGGACGAAACACCGAGGACCGAGAAGAGTGACAGTTTTAGAGCTAGGCCAACATGAGGATCAC	chrX:102631247-102631266
CHDEnh1	CHDEnh1:1	TTCAGAGTTGTTGACGCCA	GTGGAAAGGACGAAACACCGTTCAGAGTTGTTGACGCCAGTTTTAGAGCTAGGCCAACATGAGGATCAC	chr15:90734612-90734631
CHDEnh1	CHDEnh1:2	ATGAACAGCACTTCATGGG	GTGGAAAGGACGAAACACCGATGAACAGCACTTCATGGGGTTTTAGAGCTAGGCCAACATGAGGATCAC	chr15:90734745-90734764
CHDEnh1	CHDEnh1:3	AAACAAGAGGCCGGTAGCG	GTGGAAAGGACGAAACACCGAAACAAGAGGCCGGTAGCGGTTTTAGAGCTAGGCCAACATGAGGATCAC	chr15:90734910-90734929
CHDEnh1	CHDEnh1:4	AGCAGAGGGCATCCACCCC	GTGGAAAGGACGAAACACCGAGCAGAGGGCATCCACCCCGTTTTAGAGCTAGGCCAACATGAGGATCAC	chr15:90735035-90735054
CHDEnh1	CHDEnh1:5	ATTCTTTCAAATCAGCCAA	GTGGAAAGGACGAAACACCGATTCTTTCAAATCAGCCAAGTTTTAGAGCTAGGCCAACATGAGGATCAC	chr15:90735105-90735124
CHDEnh1	CHDEnh1:6	GGCATAAGAGGAGAGCTCA	GTGGAAAGGACGAAACACCGGGCATAAGAGGAGAGCTCAGTTTTAGAGCTAGGCCAACATGAGGATCAC	chr15:90735261-90735280
CHDEnh1	CHDEnh1:7	TTCTCGGGTGCTGACTGGC	GTGGAAAGGACGAAACACCGTTCTCGGGTGCTGACTGGCGTTTTAGAGCTAGGCCAACATGAGGATCAC	chr15:90735368-90735387
CHDEnh1	CHDEnh1:8	AACTCCCAGAGTAGAACTG	GTGGAAAGGACGAAACACCGAACTCCCAGAGTAGAACTGGTTTTAGAGCTAGGCCAACATGAGGATCAC	chr15:90735497-90735516
CHDEnh2	CHDEnh2:1	CAAAACTACCCTAGGGCCC	GTGGAAAGGACGAAACACCGCAAAACTACCCTAGGGCCCGTTTTAGAGCTAGGCCAACATGAGGATCAC	chr16:57302650-57302669
CHDEnh2	CHDEnh2:2	AATGCAGGAAAGTAGGCCC	GTGGAAAGGACGAAACACCGAATGCAGGAAAGTAGGCCCGTTTTAGAGCTAGGCCAACATGAGGATCAC	chr16:57302774-57302793
CHDEnh2	CHDEnh2:3	TGTGCCTGGTGCTTGAATG	GTGGAAAGGACGAAACACCGTGTGCCTGGTGCTTGAATGGTTTTAGAGCTAGGCCAACATGAGGATCAC	chr16:57302854-57302873
CHDEnh2	CHDEnh2:4	AAGGCGGTGGTGCTCCCAC	GTGGAAAGGACGAAACACCGAAGGCGGTGGTGCTCCCACGTTTTAGAGCTAGGCCAACATGAGGATCAC	chr16:57302927-57302946
CHDEnh2	CHDEnh2:5	CCCTGGCACAATGGAAGCA	GTGGAAAGGACGAAACACCGCCCTGGCACAATGGAAGCAGTTTTAGAGCTAGGCCAACATGAGGATCAC	chr16:57303045-57303064
CHDEnh2	CHDEnh2:6	GGTCAAACCCCTCCCTTTG	GTGGAAAGGACGAAACACCGGGTCAAACCCCTCCCTTTGGTTTTAGAGCTAGGCCAACATGAGGATCAC	chr16:57303141-57303160
CHDEnh2	CHDEnh2:7	TGCTGCCCCGGAAGTGAGG	GTGGAAAGGACGAAACACCGTGCTGCCCCGGAAGTGAGGGTTTTAGAGCTAGGCCAACATGAGGATCAC	chr16:57303217-57303236
CHDEnh2	CHDEnh2:8	AGGTTGGGTGACTCCCCCA	GTGGAAAGGACGAAACACCGAGGTTGGGTGACTCCCCCAGTTTTAGAGCTAGGCCAACATGAGGATCAC	chr16:57303266-57303285
CHDEnh3	CHDEnh3:1	AAGGCACAGGTTCGTCCTG	GTGGAAAGGACGAAACACCGAAGGCACAGGTTCGTCCTGGTTTTAGAGCTAGGCCAACATGAGGATCAC	chr20:1305690-1305709
CHDEnh3	CHDEnh3:2	GTCCAACGCAACGGTCCCT	GTGGAAAGGACGAAACACCGGTCCAACGCAACGGTCCCTGTTTTAGAGCTAGGCCAACATGAGGATCAC	chr20:1305786-1305805
CHDEnh3	CHDEnh3:3	GTCGCTTCCGGCTGGTTTG	GTGGAAAGGACGAAACACCGGTCGCTTCCGGCTGGTTTGGTTTTAGAGCTAGGCCAACATGAGGATCAC	chr20:1305890-1305909
CHDEnh3	CHDEnh3:4	CTTGGCGGTGTTTCTGCGC	GTGGAAAGGACGAAACACCGCTTGGCGGTGTTTCTGCGCGTTTTAGAGCTAGGCCAACATGAGGATCAC	chr20:1305958-1305977
CHDEnh3	CHDEnh3:5	GCATGCGTTTCGCCCACCC	GTGGAAAGGACGAAACACCGGCATGCGTTTCGCCCACCCGTTTTAGAGCTAGGCCAACATGAGGATCAC	chr20:1305998-1306017
CHDEnh3	CHDEnh3:6	ATCCCTAGCGGCTGCAGAG	GTGGAAAGGACGAAACACCGATCCCTAGCGGCTGCAGAGGTTTTAGAGCTAGGCCAACATGAGGATCAC	chr20:1306049-1306068
CHDEnh3	CHDEnh3:7	CGGCCCCTCTTTACCGGAT	GTGGAAAGGACGAAACACCGCGGCCCCTCTTTACCGGATGTTTTAGAGCTAGGCCAACATGAGGATCAC	chr20:1306217-1306236
CHDEnh3	CHDEnh3:8	TGACGCTTTCGAAACCAAA	GTGGAAAGGACGAAACACCGTGACGCTTTCGAAACCAAAGTTTTAGAGCTAGGCCAACATGAGGATCAC	chr20:1306398-1306417
CHDEnh4	CHDEnh4:1	GGGCAGCCATTAGCTAGGA	GTGGAAAGGACGAAACACCGGGGCAGCCATTAGCTAGGAGTTTTAGAGCTAGGCCAACATGAGGATCAC	chr20:42780215-42780234
CHDEnh4	CHDEnh4:2	CTACTCACTAGAGGGTGGT	GTGGAAAGGACGAAACACCGCTACTCACTAGAGGGTGGTGTTTTAGAGCTAGGCCAACATGAGGATCAC	chr20:42780294-42780313
CHDEnh4	CHDEnh4:3	TCTGACGTTACAAGCTAAA	GTGGAAAGGACGAAACACCGTCTGACGTTACAAGCTAAAGTTTTAGAGCTAGGCCAACATGAGGATCAC	chr20:42780349-42780368
CHDEnh4	CHDEnh4:4	AGTACGGGCTTTGAATGCC	GTGGAAAGGACGAAACACCGAGTACGGGCTTTGAATGCCGTTTTAGAGCTAGGCCAACATGAGGATCAC	chr20:42780382-42780401
CHDEnh4	CHDEnh4:5	GAATGTGCGTGATGTATTT	GTGGAAAGGACGAAACACCGGAATGTGCGTGATGTATTTGTTTTAGAGCTAGGCCAACATGAGGATCAC	chr20:42780484-42780503
CHDEnh4	CHDEnh4:6	AGCTTTCCCAGACCTCCTC	GTGGAAAGGACGAAACACCGAGCTTTCCCAGACCTCCTCGTTTTAGAGCTAGGCCAACATGAGGATCAC	chr20:42780604-42780623
CHDEnh4	CHDEnh4:7	ACCCAGTGGTGAATCAGTG	GTGGAAAGGACGAAACACCGACCCAGTGGTGAATCAGTGGTTTTAGAGCTAGGCCAACATGAGGATCAC	chr20:42780751-42780770
CHDEnh4	CHDEnh4:8	CCAACCGAAGGTCAGATCG	GTGGAAAGGACGAAACACCGCCAACCGAAGGTCAGATCGGTTTTAGAGCTAGGCCAACATGAGGATCAC	chr20:42780832-42780851
CHDEnh5	CHDEnh5:1	GGTTCTTGAACCTCGAGCA	GTGGAAAGGACGAAACACCGGGTTCTTGAACCTCGAGCAGTTTTAGAGCTAGGCCAACATGAGGATCAC	chr7:4835895-4835914
CHDEnh5	CHDEnh5:2	ATGTAAGTGTTATCAGAAA	GTGGAAAGGACGAAACACCGATGTAAGTGTTATCAGAAAGTTTTAGAGCTAGGCCAACATGAGGATCAC	chr7:4835941-4835960
CHDEnh5	CHDEnh5:3	GAGGCAGAAAGTGGGTTTG	GTGGAAAGGACGAAACACCGGAGGCAGAAAGTGGGTTTGGTTTTAGAGCTAGGCCAACATGAGGATCAC	chr7:4835985-4836004
CHDEnh5	CHDEnh5:4	GCCTAGGGGCAGAAGGGAA	GTGGAAAGGACGAAACACCGGCCTAGGGGCAGAAGGGAAGTTTTAGAGCTAGGCCAACATGAGGATCAC	chr7:4836015-4836034
CHDEnh5	CHDEnh5:5	GAAAACACGGCCACTAAGC	GTGGAAAGGACGAAACACCGGAAAACACGGCCACTAAGCGTTTTAGAGCTAGGCCAACATGAGGATCAC	chr7:4836046-4836065
CHDEnh5	CHDEnh5:6	ACCACTTTTTAAGTTAAAG	GTGGAAAGGACGAAACACCGACCACTTTTTAAGTTAAAGGTTTTAGAGCTAGGCCAACATGAGGATCAC	chr7:4836174-4836193
CHDEnh5	CHDEnh5:7	AATAGTAACAAGTCAACGT	GTGGAAAGGACGAAACACCGAATAGTAACAAGTCAACGTGTTTTAGAGCTAGGCCAACATGAGGATCAC	chr7:4836229-4836248
CHDEnh5	CHDEnh5:8	CTATTTTTGCAGCTTCCTT	GTGGAAAGGACGAAACACCGCTATTTTTGCAGCTTCCTTGTTTTAGAGCTAGGCCAACATGAGGATCAC	chr7:4836300-4836319
GATA4_ENH1	GATA4_ENH1:1	CTCCAGCCAGCTGACGTCC	GTGGAAAGGACGAAACACCGCTCCAGCCAGCTGACGTCCGTTTTAGAGCTAGGCCAACATGAGGATCAC	chr8:11599990-11600009
GATA4_ENH1	GATA4_ENH1:2	CTGCTTCTGACCCTTATAA	GTGGAAAGGACGAAACACCGCTGCTTCTGACCCTTATAAGTTTTAGAGCTAGGCCAACATGAGGATCAC	chr8:11600023-11600042
GATA4_ENH1	GATA4_ENH1:3	GCCTCTGTTCAGCAGCTGC	GTGGAAAGGACGAAACACCGGCCTCTGTTCAGCAGCTGCGTTTTAGAGCTAGGCCAACATGAGGATCAC	chr8:11600092-11600111
GATA4_ENH1	GATA4_ENH1:4	CTCCAGCGGCGCTCCGGCC	GTGGAAAGGACGAAACACCGCTCCAGCGGCGCTCCGGCCGTTTTAGAGCTAGGCCAACATGAGGATCAC	chr8:11600142-11600161
GATA4_ENH1	GATA4_ENH1:5	GACGAAGCCCAGAAGACCC	GTGGAAAGGACGAAACACCGGACGAAGCCCAGAAGACCCGTTTTAGAGCTAGGCCAACATGAGGATCAC	chr8:11600212-11600231
GATA4_ENH1	GATA4_ENH1:6	GGCCTCGTGCCCCACACCC	GTGGAAAGGACGAAACACCGGGCCTCGTGCCCCACACCCGTTTTAGAGCTAGGCCAACATGAGGATCAC	chr8:11600271-11600290
GATA4_ENH1	GATA4_ENH1:7	ATGTCCCTTGCTGAACCCC	GTGGAAAGGACGAAACACCGATGTCCCTTGCTGAACCCCGTTTTAGAGCTAGGCCAACATGAGGATCAC	chr8:11600373-11600392
GATA4_ENH1	GATA4_ENH1:8	TGAAGCCCCTTTGGTTCCC	GTGGAAAGGACGAAACACCGTGAAGCCCCTTTGGTTCCCGTTTTAGAGCTAGGCCAACATGAGGATCAC	chr8:11600416-11600435
GATA4_PROM1	GATA4_PROM1:1	ACTATTATCCCATGCCCAG	GTGGAAAGGACGAAACACCGACTATTATCCCATGCCCAGGTTTTAGAGCTAGGCCAACATGAGGATCAC	chr8:11534068-11534087
GATA4_PROM1	GATA4_PROM1:2	CTATTATCCCATGCCCAGA	GTGGAAAGGACGAAACACCGCTATTATCCCATGCCCAGAGTTTTAGAGCTAGGCCAACATGAGGATCAC	chr8:11534069-11534088
GATA4_PROM1	GATA4_PROM1:3	CCCATGAACGGCGATTCCT	GTGGAAAGGACGAAACACCGCCCATGAACGGCGATTCCTGTTTTAGAGCTAGGCCAACATGAGGATCAC	chr8:11534213-11534232
GATA4_PROM1	GATA4_PROM1:4	TGGTGTGTGTAAAAGTGGA	GTGGAAAGGACGAAACACCGTGGTGTGTGTAAAAGTGGAGTTTTAGAGCTAGGCCAACATGAGGATCAC	chr8:11534335-11534354
GATA4_PROM1	GATA4_PROM1:5	GGGACGCCGCTCCCCACCG	GTGGAAAGGACGAAACACCGGGGACGCCGCTCCCCACCGGTTTTAGAGCTAGGCCAACATGAGGATCAC	chr8:11534550-11534569
GATA4_PROM1	GATA4_PROM1:6	AGTCCCCTCCTGGCCCTCC	GTGGAAAGGACGAAACACCGAGTCCCCTCCTGGCCCTCCGTTTTAGAGCTAGGCCAACATGAGGATCAC	chr8:11534575-11534594
GATA4_PROM1	GATA4_PROM1:7	TCCGCCTCGGCCCCACGCT	GTGGAAAGGACGAAACACCGTCCGCCTCGGCCCCACGCTGTTTTAGAGCTAGGCCAACATGAGGATCAC	chr8:11534720-11534739
GATA4_PROM1	GATA4_PROM1:8	ATGCCACCTCAGTGGAAGA	GTGGAAAGGACGAAACACCGATGCCACCTCAGTGGAAGAGTTTTAGAGCTAGGCCAACATGAGGATCAC	chr8:11534850-11534869
GATA4_PROM2	GATA4_PROM2:1	CCTCCAAGGAATCCGGGGC	GTGGAAAGGACGAAACACCGCCTCCAAGGAATCCGGGGCGTTTTAGAGCTAGGCCAACATGAGGATCAC	chr8:11561220-11561239
GATA4_PROM2	GATA4_PROM2:2	CGCCCGCCGCTGCGGGATG	GTGGAAAGGACGAAACACCGCGCCCGCCGCTGCGGGATGGTTTTAGAGCTAGGCCAACATGAGGATCAC	chr8:11561367-11561386
GATA4_PROM2	GATA4_PROM2:3	TCGACCTCCGGCTGGGTTG	GTGGAAAGGACGAAACACCGTCGACCTCCGGCTGGGTTGGTTTTAGAGCTAGGCCAACATGAGGATCAC	chr8:11561466-11561485
GATA4_PROM2	GATA4_PROM2:4	CTACACCTCCGCTGGGCGC	GTGGAAAGGACGAAACACCGCTACACCTCCGCTGGGCGCGTTTTAGAGCTAGGCCAACATGAGGATCAC	chr8:11561591-11561610
GATA4_PROM2	GATA4_PROM2:5	GCGGCGACGAAGCCTCTCG	GTGGAAAGGACGAAACACCGGCGGCGACGAAGCCTCTCGGTTTTAGAGCTAGGCCAACATGAGGATCAC	chr8:11561741-11561760
GATA4_PROM2	GATA4_PROM2:6	AGTTTGGGGGACCGCGGGA	GTGGAAAGGACGAAACACCGAGTTTGGGGGACCGCGGGAGTTTTAGAGCTAGGCCAACATGAGGATCAC	chr8:11561845-11561864
GATA4_PROM2	GATA4_PROM2:7	GAAAGCGTTCAAGTTCACA	GTGGAAAGGACGAAACACCGGAAAGCGTTCAAGTTCACAGTTTTAGAGCTAGGCCAACATGAGGATCAC	chr8:11562059-11562078
GATA4_PROM2	GATA4_PROM2:8	ACCCTTGTTTGCATATCGC	GTGGAAAGGACGAAACACCGACCCTTGTTTGCATATCGCGTTTTAGAGCTAGGCCAACATGAGGATCAC	chr8:11562107-11562126
GATA4_PROM3	GATA4_PROM3:1	GTGGGCACGTAGACTGGCG	GTGGAAAGGACGAAACACCGGTGGGCACGTAGACTGGCGGTTTTAGAGCTAGGCCAACATGAGGATCAC	chr8:11565924-11565943
GATA4_PROM3	GATA4_PROM3:2	GCACCAGACGCGGCCCCAC	GTGGAAAGGACGAAACACCGGCACCAGACGCGGCCCCACGTTTTAGAGCTAGGCCAACATGAGGATCAC	chr8:11566035-11566054
GATA4_PROM3	GATA4_PROM3:3	CTGTAGGCCGCAGCTTCCC	GTGGAAAGGACGAAACACCGCTGTAGGCCGCAGCTTCCCGTTTTAGAGCTAGGCCAACATGAGGATCAC	chr8:11566200-11566219
GATA4_PROM3	GATA4_PROM3:4	ATGTAAGCCGGGTAGGGGC	GTGGAAAGGACGAAACACCGATGTAAGCCGGGTAGGGGCGTTTTAGAGCTAGGCCAACATGAGGATCAC	chr8:11566299-11566318
GATA4_PROM3	GATA4_PROM3:5	ATTGGGGTGTCGGGCGGCC	GTGGAAAGGACGAAACACCGATTGGGGTGTCGGGCGGCCGTTTTAGAGCTAGGCCAACATGAGGATCAC	chr8:11566414-11566433
GATA4_PROM3	GATA4_PROM3:6	TCACTACCTCGAGTTTCTA	GTGGAAAGGACGAAACACCGTCACTACCTCGAGTTTCTAGTTTTAGAGCTAGGCCAACATGAGGATCAC	chr8:11566552-11566571
GATA4_PROM3	GATA4_PROM3:7	CTCTTCTGAGATGGTGTCA	GTGGAAAGGACGAAACACCGCTCTTCTGAGATGGTGTCAGTTTTAGAGCTAGGCCAACATGAGGATCAC	chr8:11566659-11566678
GATA4_PROM3	GATA4_PROM3:8	CCTGGGATTTCCTCGTGGA	GTGGAAAGGACGAAACACCGCCTGGGATTTCCTCGTGGAGTTTTAGAGCTAGGCCAACATGAGGATCAC	chr8:11566784-11566803
GLI2_ENH1	GLI2_ENH1:1	TTCCTTTTGGCACGCGCTA	GTGGAAAGGACGAAACACCGTTCCTTTTGGCACGCGCTAGTTTTAGAGCTAGGCCAACATGAGGATCAC	chr2:121523417-121523436
GLI2_ENH1	GLI2_ENH1:2	GCAGGAAAAGCACTCCTCC	GTGGAAAGGACGAAACACCGGCAGGAAAAGCACTCCTCCGTTTTAGAGCTAGGCCAACATGAGGATCAC	chr2:121523510-121523529
GLI2_ENH1	GLI2_ENH1:3	TCCGAGACCTTGCCCACAG	GTGGAAAGGACGAAACACCGTCCGAGACCTTGCCCACAGGTTTTAGAGCTAGGCCAACATGAGGATCAC	chr2:121523587-121523606
GLI2_ENH1	GLI2_ENH1:4	GCCACGCGAGAGGGGAGCT	GTGGAAAGGACGAAACACCGGCCACGCGAGAGGGGAGCTGTTTTAGAGCTAGGCCAACATGAGGATCAC	chr2:121523626-121523645
GLI2_ENH1	GLI2_ENH1:5	CATCACGATGGGGAGGGTT	GTGGAAAGGACGAAACACCGCATCACGATGGGGAGGGTTGTTTTAGAGCTAGGCCAACATGAGGATCAC	chr2:121523662-121523681
GLI2_ENH1	GLI2_ENH1:6	AAGGCTGCGAGGTCACAGA	GTGGAAAGGACGAAACACCGAAGGCTGCGAGGTCACAGAGTTTTAGAGCTAGGCCAACATGAGGATCAC	chr2:121523759-121523778
GLI2_ENH1	GLI2_ENH1:7	CAAACTGAGGCGCCACAGC	GTGGAAAGGACGAAACACCGCAAACTGAGGCGCCACAGCGTTTTAGAGCTAGGCCAACATGAGGATCAC	chr2:121523785-121523804
GLI2_ENH1	GLI2_ENH1:8	GACGCTCTTCACACTGTCT	GTGGAAAGGACGAAACACCGGACGCTCTTCACACTGTCTGTTTTAGAGCTAGGCCAACATGAGGATCAC	chr2:121523860-121523879
GLI2_PROM1	GLI2_PROM1:1	CACGCGGACCCTCTTCCCG	GTGGAAAGGACGAAACACCGCACGCGGACCCTCTTCCCGGTTTTAGAGCTAGGCCAACATGAGGATCAC	chr2:121492947-121492966
GLI2_PROM1	GLI2_PROM1:2	AGCCCTTGCCCCTCAGCTC	GTGGAAAGGACGAAACACCGAGCCCTTGCCCCTCAGCTCGTTTTAGAGCTAGGCCAACATGAGGATCAC	chr2:121493119-121493138
GLI2_PROM1	GLI2_PROM1:3	CGGAGATTGGCGCGTCCTT	GTGGAAAGGACGAAACACCGCGGAGATTGGCGCGTCCTTGTTTTAGAGCTAGGCCAACATGAGGATCAC	chr2:121493210-121493229
GLI2_PROM1	GLI2_PROM1:4	ACCCGAACGCCGCCGGGGC	GTGGAAAGGACGAAACACCGACCCGAACGCCGCCGGGGCGTTTTAGAGCTAGGCCAACATGAGGATCAC	chr2:121493321-121493340
GLI2_PROM1	GLI2_PROM1:5	TGCCTCGGCTGGCAAGCGC	GTGGAAAGGACGAAACACCGTGCCTCGGCTGGCAAGCGCGTTTTAGAGCTAGGCCAACATGAGGATCAC	chr2:121493466-121493485
GLI2_PROM1	GLI2_PROM1:6	CGCGGCGCGCCGCAGCCTC	GTGGAAAGGACGAAACACCGCGCGGCGCGCCGCAGCCTCGTTTTAGAGCTAGGCCAACATGAGGATCAC	chr2:121493622-121493641
GLI2_PROM1	GLI2_PROM1:7	GGCGGGCCAGGCAAGAGAG	GTGGAAAGGACGAAACACCGGGCGGGCCAGGCAAGAGAGGTTTTAGAGCTAGGCCAACATGAGGATCAC	chr2:121493701-121493720
GLI2_PROM1	GLI2_PROM1:8	TAGCACGCAGGTGGCCTCT	GTGGAAAGGACGAAACACCGTAGCACGCAGGTGGCCTCTGTTTTAGAGCTAGGCCAACATGAGGATCAC	chr2:121493819-121493838
IRX4_ENH1	IRX4_ENH1:1	CCTGGCGACCCCTGAGTTG	GTGGAAAGGACGAAACACCGCCTGGCGACCCCTGAGTTGGTTTTAGAGCTAGGCCAACATGAGGATCAC	chr5:1841157-1841176
IRX4_ENH1	IRX4_ENH1:2	CACGCTTCATCCCCAGCGC	GTGGAAAGGACGAAACACCGCACGCTTCATCCCCAGCGCGTTTTAGAGCTAGGCCAACATGAGGATCAC	chr5:1841229-1841248
IRX4_ENH1	IRX4_ENH1:3	AGGGTGCAGATAAGGCACC	GTGGAAAGGACGAAACACCGAGGGTGCAGATAAGGCACCGTTTTAGAGCTAGGCCAACATGAGGATCAC	chr5:1841304-1841323
IRX4_ENH1	IRX4_ENH1:4	GGTTATCTGGCTTGACCTT	GTGGAAAGGACGAAACACCGGGTTATCTGGCTTGACCTTGTTTTAGAGCTAGGCCAACATGAGGATCAC	chr5:1841331-1841350
IRX4_ENH1	IRX4_ENH1:5	CAGCCTTCCTGAGTGGTCA	GTGGAAAGGACGAAACACCGCAGCCTTCCTGAGTGGTCAGTTTTAGAGCTAGGCCAACATGAGGATCAC	chr5:1841417-1841436
IRX4_ENH1	IRX4_ENH1:6	GCGCAGGGATGGCGCTGAC	GTGGAAAGGACGAAACACCGGCGCAGGGATGGCGCTGACGTTTTAGAGCTAGGCCAACATGAGGATCAC	chr5:1841485-1841504
IRX4_ENH1	IRX4_ENH1:7	GCCGGCACAGCTGGGTGTC	GTGGAAAGGACGAAACACCGGCCGGCACAGCTGGGTGTCGTTTTAGAGCTAGGCCAACATGAGGATCAC	chr5:1841512-1841531
IRX4_ENH1	IRX4_ENH1:8	CAGCCGCTGCTCCAGGGCC	GTGGAAAGGACGAAACACCGCAGCCGCTGCTCCAGGGCCGTTTTAGAGCTAGGCCAACATGAGGATCAC	chr5:1841589-1841608
IRX4_PROM1	IRX4_PROM1:1	CCTGCAGGGTTCTGCGCGC	GTGGAAAGGACGAAACACCGCCTGCAGGGTTCTGCGCGCGTTTTAGAGCTAGGCCAACATGAGGATCAC	chr5:1882792-1882811
IRX4_PROM1	IRX4_PROM1:2	TTCCTTTAACTTCGCATTC	GTGGAAAGGACGAAACACCGTTCCTTTAACTTCGCATTCGTTTTAGAGCTAGGCCAACATGAGGATCAC	chr5:1882956-1882975
IRX4_PROM1	IRX4_PROM1:3	CGCGCACATCTGACTTGAC	GTGGAAAGGACGAAACACCGCGCGCACATCTGACTTGACGTTTTAGAGCTAGGCCAACATGAGGATCAC	chr5:1883075-1883094
IRX4_PROM1	IRX4_PROM1:4	CTCGCCGGTCACTCGCCGG	GTGGAAAGGACGAAACACCGCTCGCCGGTCACTCGCCGGGTTTTAGAGCTAGGCCAACATGAGGATCAC	chr5:1883155-1883174
IRX4_PROM1	IRX4_PROM1:5	TTAGTCACCCGAGAACGAG	GTGGAAAGGACGAAACACCGTTAGTCACCCGAGAACGAGGTTTTAGAGCTAGGCCAACATGAGGATCAC	chr5:1883296-1883315
IRX4_PROM1	IRX4_PROM1:6	CGGCCGCCTGCGCAGCGCC	GTGGAAAGGACGAAACACCGCGGCCGCCTGCGCAGCGCCGTTTTAGAGCTAGGCCAACATGAGGATCAC	chr5:1883446-1883465
IRX4_PROM1	IRX4_PROM1:7	AATCAGCAACGCCTCCCGC	GTGGAAAGGACGAAACACCGAATCAGCAACGCCTCCCGCGTTTTAGAGCTAGGCCAACATGAGGATCAC	chr5:1883556-1883575
IRX4_PROM1	IRX4_PROM1:8	CGAAGCCCCCACGCACCTG	GTGGAAAGGACGAAACACCGCGAAGCCCCCACGCACCTGGTTTTAGAGCTAGGCCAACATGAGGATCAC	chr5:1883657-1883676
IRX4_PROM2	IRX4_PROM2:1	CCTGTGCCCGCCCACCGCT	GTGGAAAGGACGAAACACCGCCTGTGCCCGCCCACCGCTGTTTTAGAGCTAGGCCAACATGAGGATCAC	chr5:1886496-1886515
IRX4_PROM2	IRX4_PROM2:2	TCCTACCACTGGCTCCGAG	GTGGAAAGGACGAAACACCGTCCTACCACTGGCTCCGAGGTTTTAGAGCTAGGCCAACATGAGGATCAC	chr5:1886620-1886639
IRX4_PROM2	IRX4_PROM2:3	GCCGTACCCAGGGAGCAAG	GTGGAAAGGACGAAACACCGGCCGTACCCAGGGAGCAAGGTTTTAGAGCTAGGCCAACATGAGGATCAC	chr5:1886739-1886758
IRX4_PROM2	IRX4_PROM2:4	TGCGTTTGCTGCAAGTTGC	GTGGAAAGGACGAAACACCGTGCGTTTGCTGCAAGTTGCGTTTTAGAGCTAGGCCAACATGAGGATCAC	chr5:1886859-1886878
IRX4_PROM2	IRX4_PROM2:5	AGCTCCCGCCCGCGCCGTG	GTGGAAAGGACGAAACACCGAGCTCCCGCCCGCGCCGTGGTTTTAGAGCTAGGCCAACATGAGGATCAC	chr5:1886987-1887006
IRX4_PROM2	IRX4_PROM2:6	GAGGGGTCTCGGAACCCCG	GTGGAAAGGACGAAACACCGGAGGGGTCTCGGAACCCCGGTTTTAGAGCTAGGCCAACATGAGGATCAC	chr5:1887124-1887143
IRX4_PROM2	IRX4_PROM2:7	GTTGTCGCCGGCTCCCCGC	GTGGAAAGGACGAAACACCGGTTGTCGCCGGCTCCCCGCGTTTTAGAGCTAGGCCAACATGAGGATCAC	chr5:1887245-1887264
IRX4_PROM2	IRX4_PROM2:8	CGTTAATGGGCGGCCGGGT	GTGGAAAGGACGAAACACCGCGTTAATGGGCGGCCGGGTGTTTTAGAGCTAGGCCAACATGAGGATCAC	chr5:1887383-1887402
ISL1_PROM1	ISL1_PROM1:1	CAATCAGGTTGGAACGCAC	GTGGAAAGGACGAAACACCGCAATCAGGTTGGAACGCACGTTTTAGAGCTAGGCCAACATGAGGATCAC	chr5:50678472-50678491
ISL1_PROM1	ISL1_PROM1:2	ATGGGATGATTAAACCCAG	GTGGAAAGGACGAAACACCGATGGGATGATTAAACCCAGGTTTTAGAGCTAGGCCAACATGAGGATCAC	chr5:50678592-50678611
ISL1_PROM1	ISL1_PROM1:3	TGGTTTGGTCCCCACGCCG	GTGGAAAGGACGAAACACCGTGGTTTGGTCCCCACGCCGGTTTTAGAGCTAGGCCAACATGAGGATCAC	chr5:50678711-50678730
ISL1_PROM1	ISL1_PROM1:4	GTGAGCCCCGCGCGCAACG	GTGGAAAGGACGAAACACCGGTGAGCCCCGCGCGCAACGGTTTTAGAGCTAGGCCAACATGAGGATCAC	chr5:50678833-50678852
ISL1_PROM1	ISL1_PROM1:5	GCCCGGCAGCCCGAGCTTC	GTGGAAAGGACGAAACACCGGCCCGGCAGCCCGAGCTTCGTTTTAGAGCTAGGCCAACATGAGGATCAC	chr5:50679000-50679019
ISL1_PROM1	ISL1_PROM1:6	CTGAGCGCCACTGACCGCT	GTGGAAAGGACGAAACACCGCTGAGCGCCACTGACCGCTGTTTTAGAGCTAGGCCAACATGAGGATCAC	chr5:50679087-50679106
ISL1_PROM1	ISL1_PROM1:7	AACTCAGCTCCATCGCCAT	GTGGAAAGGACGAAACACCGAACTCAGCTCCATCGCCATGTTTTAGAGCTAGGCCAACATGAGGATCAC	chr5:50679209-50679228
ISL1_PROM1	ISL1_PROM1:8	TTGGACTCCTAGATCCGCG	GTGGAAAGGACGAAACACCGTTGGACTCCTAGATCCGCGGTTTTAGAGCTAGGCCAACATGAGGATCAC	chr5:50679332-50679351
MEIS1_ENH1	MEIS1_ENH1:1	TGTCAACGGGCTGCACCTA	GTGGAAAGGACGAAACACCGTGTCAACGGGCTGCACCTAGTTTTAGAGCTAGGCCAACATGAGGATCAC	chr2:66666440-66666459
MEIS1_ENH1	MEIS1_ENH1:2	CACCGAGATCCCCCGAGCC	GTGGAAAGGACGAAACACCGCACCGAGATCCCCCGAGCCGTTTTAGAGCTAGGCCAACATGAGGATCAC	chr2:66666510-66666529
MEIS1_ENH1	MEIS1_ENH1:3	GTTCCTGCGGGTTCCTCCT	GTGGAAAGGACGAAACACCGGTTCCTGCGGGTTCCTCCTGTTTTAGAGCTAGGCCAACATGAGGATCAC	chr2:66666549-66666568
MEIS1_ENH1	MEIS1_ENH1:4	CTGCACATCCAGGATCCGG	GTGGAAAGGACGAAACACCGCTGCACATCCAGGATCCGGGTTTTAGAGCTAGGCCAACATGAGGATCAC	chr2:66666608-66666627
MEIS1_ENH1	MEIS1_ENH1:5	CGTATCTGGCCGGAGAAAT	GTGGAAAGGACGAAACACCGCGTATCTGGCCGGAGAAATGTTTTAGAGCTAGGCCAACATGAGGATCAC	chr2:66666715-66666734
MEIS1_ENH1	MEIS1_ENH1:6	AGGATCGGTTTAGCGTATC	GTGGAAAGGACGAAACACCGAGGATCGGTTTAGCGTATCGTTTTAGAGCTAGGCCAACATGAGGATCAC	chr2:66666728-66666747
MEIS1_ENH1	MEIS1_ENH1:7	GTGAGCGGTCACCTGGGTC	GTGGAAAGGACGAAACACCGGTGAGCGGTCACCTGGGTCGTTTTAGAGCTAGGCCAACATGAGGATCAC	chr2:66666803-66666822
MEIS1_ENH1	MEIS1_ENH1:8	TAGATGACACAATCGGAGA	GTGGAAAGGACGAAACACCGTAGATGACACAATCGGAGAGTTTTAGAGCTAGGCCAACATGAGGATCAC	chr2:66666850-66666869
MEIS1_ENH2	MEIS1_ENH2:1	CATCCTGATCCCCTGCAGC	GTGGAAAGGACGAAACACCGCATCCTGATCCCCTGCAGCGTTTTAGAGCTAGGCCAACATGAGGATCAC	chr2:66708234-66708253
MEIS1_ENH2	MEIS1_ENH2:2	ACCCAGGACATGTAAGCTC	GTGGAAAGGACGAAACACCGACCCAGGACATGTAAGCTCGTTTTAGAGCTAGGCCAACATGAGGATCAC	chr2:66708261-66708280
MEIS1_ENH2	MEIS1_ENH2:3	TCTTCCTACTACTCACTGA	GTGGAAAGGACGAAACACCGTCTTCCTACTACTCACTGAGTTTTAGAGCTAGGCCAACATGAGGATCAC	chr2:66708333-66708352
MEIS1_ENH2	MEIS1_ENH2:4	GGCTCTCTATTCTGGTGCT	GTGGAAAGGACGAAACACCGGGCTCTCTATTCTGGTGCTGTTTTAGAGCTAGGCCAACATGAGGATCAC	chr2:66708385-66708404
MEIS1_ENH2	MEIS1_ENH2:5	GCTGGCTACATAGCAATGG	GTGGAAAGGACGAAACACCGGCTGGCTACATAGCAATGGGTTTTAGAGCTAGGCCAACATGAGGATCAC	chr2:66708443-66708462
MEIS1_ENH2	MEIS1_ENH2:6	ATGCTGATAGGCAGCAGGA	GTGGAAAGGACGAAACACCGATGCTGATAGGCAGCAGGAGTTTTAGAGCTAGGCCAACATGAGGATCAC	chr2:66708536-66708555
MEIS1_ENH2	MEIS1_ENH2:7	AGCCAGCTAAAGCTAATCC	GTGGAAAGGACGAAACACCGAGCCAGCTAAAGCTAATCCGTTTTAGAGCTAGGCCAACATGAGGATCAC	chr2:66708583-66708602
MEIS1_ENH2	MEIS1_ENH2:8	AATGACGCTGCCATTCTTT	GTGGAAAGGACGAAACACCGAATGACGCTGCCATTCTTTGTTTTAGAGCTAGGCCAACATGAGGATCAC	chr2:66708634-66708653
MEIS1_PROM	MEIS1_PROM:1	GGGATCGTGGAGGAAAAGG	GTGGAAAGGACGAAACACCGGGGATCGTGGAGGAAAAGGGTTTTAGAGCTAGGCCAACATGAGGATCAC	chr2:66661771-66661790
MEIS1_PROM	MEIS1_PROM:2	AAGTCATGAAGTCTATGCG	GTGGAAAGGACGAAACACCGAAGTCATGAAGTCTATGCGGTTTTAGAGCTAGGCCAACATGAGGATCAC	chr2:66661892-66661911
MEIS1_PROM	MEIS1_PROM:3	AAAATAAAGCTGGCGGCCG	GTGGAAAGGACGAAACACCGAAAATAAAGCTGGCGGCCGGTTTTAGAGCTAGGCCAACATGAGGATCAC	chr2:66662029-66662048
MEIS1_PROM	MEIS1_PROM:4	AGCTCTGGCCGCACTGGAG	GTGGAAAGGACGAAACACCGAGCTCTGGCCGCACTGGAGGTTTTAGAGCTAGGCCAACATGAGGATCAC	chr2:66662136-66662155
MEIS1_PROM	MEIS1_PROM:5	GTGTGTTGCACAGGCGGAG	GTGGAAAGGACGAAACACCGGTGTGTTGCACAGGCGGAGGTTTTAGAGCTAGGCCAACATGAGGATCAC	chr2:66662276-66662295
MEIS1_PROM	MEIS1_PROM:6	CAGTGCAGCACTTGCAAAG	GTGGAAAGGACGAAACACCGCAGTGCAGCACTTGCAAAGGTTTTAGAGCTAGGCCAACATGAGGATCAC	chr2:66662400-66662419
MEIS1_PROM	MEIS1_PROM:7	CATCCGCTCTGTCTTCTTC	GTGGAAAGGACGAAACACCGCATCCGCTCTGTCTTCTTCGTTTTAGAGCTAGGCCAACATGAGGATCAC	chr2:66662550-66662569
MEIS1_PROM	MEIS1_PROM:8	ATTTGGTAGTTGGGTCTGA	GTGGAAAGGACGAAACACCGATTTGGTAGTTGGGTCTGAGTTTTAGAGCTAGGCCAACATGAGGATCAC	chr2:66662635-66662654
MSX2_ENH1	MSX2_ENH1:1	TTTCAAAATTATCGATAAA	GTGGAAAGGACGAAACACCGTTTCAAAATTATCGATAAAGTTTTAGAGCTAGGCCAACATGAGGATCAC	chr5:174119979-174119998
MSX2_ENH1	MSX2_ENH1:2	TGCCTCGTGGAGAATCCAA	GTGGAAAGGACGAAACACCGTGCCTCGTGGAGAATCCAAGTTTTAGAGCTAGGCCAACATGAGGATCAC	chr5:174120035-174120054
MSX2_ENH1	MSX2_ENH1:3	GGGCTAATAAAGCGTTGAA	GTGGAAAGGACGAAACACCGGGGCTAATAAAGCGTTGAAGTTTTAGAGCTAGGCCAACATGAGGATCAC	chr5:174120114-174120133
MSX2_ENH1	MSX2_ENH1:4	GATTGAGGAAAGCTATTCA	GTGGAAAGGACGAAACACCGGATTGAGGAAAGCTATTCAGTTTTAGAGCTAGGCCAACATGAGGATCAC	chr5:174120182-174120201
MSX2_ENH1	MSX2_ENH1:5	AGCAACTCTGGAAACACAG	GTGGAAAGGACGAAACACCGAGCAACTCTGGAAACACAGGTTTTAGAGCTAGGCCAACATGAGGATCAC	chr5:174120263-174120282
MSX2_ENH1	MSX2_ENH1:6	TTGACCTTCATTGGACAGT	GTGGAAAGGACGAAACACCGTTGACCTTCATTGGACAGTGTTTTAGAGCTAGGCCAACATGAGGATCAC	chr5:174120307-174120326
MSX2_ENH1	MSX2_ENH1:7	AAGAAAGAGCGTCAATCAC	GTGGAAAGGACGAAACACCGAAGAAAGAGCGTCAATCACGTTTTAGAGCTAGGCCAACATGAGGATCAC	chr5:174120383-174120402
MSX2_ENH1	MSX2_ENH1:8	TGACTTAAAGGGGGGTGTC	GTGGAAAGGACGAAACACCGTGACTTAAAGGGGGGTGTCGTTTTAGAGCTAGGCCAACATGAGGATCAC	chr5:174120409-174120428
MSX2_PROM1	MSX2_PROM1:1	AGTCGGTGCTGAAACTCAC	GTGGAAAGGACGAAACACCGAGTCGGTGCTGAAACTCACGTTTTAGAGCTAGGCCAACATGAGGATCAC	chr5:174151091-174151110
MSX2_PROM1	MSX2_PROM1:2	TTTTGACCCTTCTTTAAAA	GTGGAAAGGACGAAACACCGTTTTGACCCTTCTTTAAAAGTTTTAGAGCTAGGCCAACATGAGGATCAC	chr5:174151237-174151256
MSX2_PROM1	MSX2_PROM1:3	GGCGTGATTATAACCCTTC	GTGGAAAGGACGAAACACCGGGCGTGATTATAACCCTTCGTTTTAGAGCTAGGCCAACATGAGGATCAC	chr5:174151331-174151350
MSX2_PROM1	MSX2_PROM1:4	CCTTCGGGAAGAGCCAATC	GTGGAAAGGACGAAACACCGCCTTCGGGAAGAGCCAATCGTTTTAGAGCTAGGCCAACATGAGGATCAC	chr5:174151454-174151473
MSX2_PROM1	MSX2_PROM1:5	TTTTGCTGCGGAGACGGGA	GTGGAAAGGACGAAACACCGTTTTGCTGCGGAGACGGGAGTTTTAGAGCTAGGCCAACATGAGGATCAC	chr5:174151574-174151593
MSX2_PROM1	MSX2_PROM1:6	GTGGTGGCCGGACCAGGCC	GTGGAAAGGACGAAACACCGGTGGTGGCCGGACCAGGCCGTTTTAGAGCTAGGCCAACATGAGGATCAC	chr5:174151719-174151738
MSX2_PROM1	MSX2_PROM1:7	GCGGGGACGCCTCCTTGGG	GTGGAAAGGACGAAACACCGGCGGGGACGCCTCCTTGGGGTTTTAGAGCTAGGCCAACATGAGGATCAC	chr5:174151836-174151855
MSX2_PROM1	MSX2_PROM1:8	GAATTTTCCGACTTGACCG	GTGGAAAGGACGAAACACCGGAATTTTCCGACTTGACCGGTTTTAGAGCTAGGCCAACATGAGGATCAC	chr5:174151969-174151988
NKX2-6_ENH1	NKX2-6_ENH1:1	GCTGGGCGGCGGGTTTCAG	GTGGAAAGGACGAAACACCGGCTGGGCGGCGGGTTTCAGGTTTTAGAGCTAGGCCAACATGAGGATCAC	chr8:23584032-23584051
NKX2-6_ENH1	NKX2-6_ENH1:2	TTTCTAGAAACCGGCCGGG	GTGGAAAGGACGAAACACCGTTTCTAGAAACCGGCCGGGGTTTTAGAGCTAGGCCAACATGAGGATCAC	chr8:23584112-23584131
NKX2-6_ENH1	NKX2-6_ENH1:3	GCAGATCTAAGGCCAGACC	GTGGAAAGGACGAAACACCGGCAGATCTAAGGCCAGACCGTTTTAGAGCTAGGCCAACATGAGGATCAC	chr8:23584161-23584180
NKX2-6_ENH1	NKX2-6_ENH1:4	TGCGACAAGGCGAACACCA	GTGGAAAGGACGAAACACCGTGCGACAAGGCGAACACCAGTTTTAGAGCTAGGCCAACATGAGGATCAC	chr8:23584217-23584236
NKX2-6_ENH1	NKX2-6_ENH1:5	AGCGCCTAGGAGGTGGCCG	GTGGAAAGGACGAAACACCGAGCGCCTAGGAGGTGGCCGGTTTTAGAGCTAGGCCAACATGAGGATCAC	chr8:23584294-23584313
NKX2-6_ENH1	NKX2-6_ENH1:6	AGCGGGACCACGGGCAGAG	GTGGAAAGGACGAAACACCGAGCGGGACCACGGGCAGAGGTTTTAGAGCTAGGCCAACATGAGGATCAC	chr8:23584341-23584360
NKX2-6_ENH1	NKX2-6_ENH1:7	AGACTGACGGCGGAGGCGG	GTGGAAAGGACGAAACACCGAGACTGACGGCGGAGGCGGGTTTTAGAGCTAGGCCAACATGAGGATCAC	chr8:23584414-23584433
NKX2-6_ENH1	NKX2-6_ENH1:8	GGTTGTTTTCGTTTGGCCC	GTGGAAAGGACGAAACACCGGGTTGTTTTCGTTTGGCCCGTTTTAGAGCTAGGCCAACATGAGGATCAC	chr8:23584470-23584489
NKX2-6_PROM1	NKX2-6_PROM1:1	AGTAAGGCCCTGAATCTCA	GTGGAAAGGACGAAACACCGAGTAAGGCCCTGAATCTCAGTTTTAGAGCTAGGCCAACATGAGGATCAC	chr8:23563615-23563634
NKX2-6_PROM1	NKX2-6_PROM1:2	AATACGCCTCCTATCTCCT	GTGGAAAGGACGAAACACCGAATACGCCTCCTATCTCCTGTTTTAGAGCTAGGCCAACATGAGGATCAC	chr8:23563742-23563761
NKX2-6_PROM1	NKX2-6_PROM1:3	ATGGTTCGGAGCCTCCTGG	GTGGAAAGGACGAAACACCGATGGTTCGGAGCCTCCTGGGTTTTAGAGCTAGGCCAACATGAGGATCAC	chr8:23563890-23563909
NKX2-6_PROM1	NKX2-6_PROM1:4	CCGGGCTCTTCCGCACCCG	GTGGAAAGGACGAAACACCGCCGGGCTCTTCCGCACCCGGTTTTAGAGCTAGGCCAACATGAGGATCAC	chr8:23563996-23564015
NKX2-6_PROM1	NKX2-6_PROM1:5	GCCCCGCCCCATCCGCCTT	GTGGAAAGGACGAAACACCGGCCCCGCCCCATCCGCCTTGTTTTAGAGCTAGGCCAACATGAGGATCAC	chr8:23564115-23564134
NKX2-6_PROM1	NKX2-6_PROM1:6	GGACCCGGGCCTACCAGCA	GTGGAAAGGACGAAACACCGGGACCCGGGCCTACCAGCAGTTTTAGAGCTAGGCCAACATGAGGATCAC	chr8:23564256-23564275
NKX2-6_PROM1	NKX2-6_PROM1:7	GAGAGGATTCGACGGGCGC	GTGGAAAGGACGAAACACCGGAGAGGATTCGACGGGCGCGTTTTAGAGCTAGGCCAACATGAGGATCAC	chr8:23564365-23564384
NKX2-6_PROM1	NKX2-6_PROM1:8	GTACTAGCGGGAGCTTCCG	GTGGAAAGGACGAAACACCGGTACTAGCGGGAGCTTCCGGTTTTAGAGCTAGGCCAACATGAGGATCAC	chr8:23564491-23564510
NKX3-1_PROM1	NKX3-1_PROM1:1	TCCTGCGCCGCCCTGACGC	GTGGAAAGGACGAAACACCGTCCTGCGCCGCCCTGACGCGTTTTAGAGCTAGGCCAACATGAGGATCAC	chr8:23539949-23539968
NKX3-1_PROM1	NKX3-1_PROM1:2	GGCGGACCCCCAGAGCTCG	GTGGAAAGGACGAAACACCGGGCGGACCCCCAGAGCTCGGTTTTAGAGCTAGGCCAACATGAGGATCAC	chr8:23540062-23540081
NKX3-1_PROM1	NKX3-1_PROM1:3	GGGAGGACGCAGCCGCGCC	GTGGAAAGGACGAAACACCGGGGAGGACGCAGCCGCGCCGTTTTAGAGCTAGGCCAACATGAGGATCAC	chr8:23540195-23540214
NKX3-1_PROM1	NKX3-1_PROM1:4	AGGAAGGACGTGAGCGGCT	GTGGAAAGGACGAAACACCGAGGAAGGACGTGAGCGGCTGTTTTAGAGCTAGGCCAACATGAGGATCAC	chr8:23540313-23540332
NKX3-1_PROM1	NKX3-1_PROM1:5	AGTGAAAGCGGTGCGGGCC	GTGGAAAGGACGAAACACCGAGTGAAAGCGGTGCGGGCCGTTTTAGAGCTAGGCCAACATGAGGATCAC	chr8:23540438-23540457
NKX3-1_PROM1	NKX3-1_PROM1:6	CAGGGCTCGCAGATCGGCG	GTGGAAAGGACGAAACACCGCAGGGCTCGCAGATCGGCGGTTTTAGAGCTAGGCCAACATGAGGATCAC	chr8:23540566-23540585
NKX3-1_PROM1	NKX3-1_PROM1:7	GAAAACGGCTCAGGGCGGA	GTGGAAAGGACGAAACACCGGAAAACGGCTCAGGGCGGAGTTTTAGAGCTAGGCCAACATGAGGATCAC	chr8:23540693-23540712
NKX3-1_PROM1	NKX3-1_PROM1:8	GACCGTCAGAGCCAATTAC	GTGGAAAGGACGAAACACCGGACCGTCAGAGCCAATTACGTTTTAGAGCTAGGCCAACATGAGGATCAC	chr8:23540824-23540843
NR2F1_PROM1	NR2F1_PROM1:1	AGCTACCTACAGACTGGGA	GTGGAAAGGACGAAACACCGAGCTACCTACAGACTGGGAGTTTTAGAGCTAGGCCAACATGAGGATCAC	chr5:92918631-92918650
NR2F1_PROM1	NR2F1_PROM1:2	GGAGGGGCTCTCCAACCAA	GTGGAAAGGACGAAACACCGGGAGGGGCTCTCCAACCAAGTTTTAGAGCTAGGCCAACATGAGGATCAC	chr5:92918687-92918706
NR2F1_PROM1	NR2F1_PROM1:3	TTGACACGAGCTCCATATA	GTGGAAAGGACGAAACACCGTTGACACGAGCTCCATATAGTTTTAGAGCTAGGCCAACATGAGGATCAC	chr5:92918822-92918841
NR2F1_PROM1	NR2F1_PROM1:4	GAGCAATGTTTCCGAAAGG	GTGGAAAGGACGAAACACCGGAGCAATGTTTCCGAAAGGGTTTTAGAGCTAGGCCAACATGAGGATCAC	chr5:92918921-92918940
NR2F1_PROM1	NR2F1_PROM1:5	AACGATAAGAAGAATACGA	GTGGAAAGGACGAAACACCGAACGATAAGAAGAATACGAGTTTTAGAGCTAGGCCAACATGAGGATCAC	chr5:92919270-92919289
NR2F1_PROM1	NR2F1_PROM1:6	ACATTTTTGGGCGATCTCC	GTGGAAAGGACGAAACACCGACATTTTTGGGCGATCTCCGTTTTAGAGCTAGGCCAACATGAGGATCAC	chr5:92919371-92919390
NR2F1_PROM1	NR2F1_PROM1:7	TTATTTATTCGACCTACTT	GTGGAAAGGACGAAACACCGTTATTTATTCGACCTACTTGTTTTAGAGCTAGGCCAACATGAGGATCAC	chr5:92919466-92919485
RBM20_ENH1	RBM20_ENH1:1	AAAGGTTCAGGCTTTCAGT	GTGGAAAGGACGAAACACCGAAAGGTTCAGGCTTTCAGTGTTTTAGAGCTAGGCCAACATGAGGATCAC	chr10:112389347-112389366
RBM20_ENH1	RBM20_ENH1:2	TAGGCATTATGCACATTTT	GTGGAAAGGACGAAACACCGTAGGCATTATGCACATTTTGTTTTAGAGCTAGGCCAACATGAGGATCAC	chr10:112389455-112389474
RBM20_ENH1	RBM20_ENH1:3	ACTCTACATAATACAAGAT	GTGGAAAGGACGAAACACCGACTCTACATAATACAAGATGTTTTAGAGCTAGGCCAACATGAGGATCAC	chr10:112389473-112389492
RBM20_ENH1	RBM20_ENH1:4	TGTTTCATTCATGCTGCAT	GTGGAAAGGACGAAACACCGTGTTTCATTCATGCTGCATGTTTTAGAGCTAGGCCAACATGAGGATCAC	chr10:112389575-112389594
RBM20_ENH1	RBM20_ENH1:5	AAGTTGACACTGTGCCAAC	GTGGAAAGGACGAAACACCGAAGTTGACACTGTGCCAACGTTTTAGAGCTAGGCCAACATGAGGATCAC	chr10:112389598-112389617
RBM20_ENH1	RBM20_ENH1:6	CATGCTAAATGTAAACAGT	GTGGAAAGGACGAAACACCGCATGCTAAATGTAAACAGTGTTTTAGAGCTAGGCCAACATGAGGATCAC	chr10:112389671-112389690
RBM20_ENH1	RBM20_ENH1:7	GAGTGGGTAGAACACACAG	GTGGAAAGGACGAAACACCGGAGTGGGTAGAACACACAGGTTTTAGAGCTAGGCCAACATGAGGATCAC	chr10:112389731-112389750
RBM20_ENH1	RBM20_ENH1:8	CAACTGATCAGCACCACGA	GTGGAAAGGACGAAACACCGCAACTGATCAGCACCACGAGTTTTAGAGCTAGGCCAACATGAGGATCAC	chr10:112389813-112389832
RBM20_PROM1	RBM20_PROM1:1	GGGCGGACCGAGCGCGCCC	GTGGAAAGGACGAAACACCGGGGCGGACCGAGCGCGCCCGTTTTAGAGCTAGGCCAACATGAGGATCAC	chr10:112403668-112403687
RBM20_PROM1	RBM20_PROM1:2	GACACACGCAGCCCGCGGT	GTGGAAAGGACGAAACACCGGACACACGCAGCCCGCGGTGTTTTAGAGCTAGGCCAACATGAGGATCAC	chr10:112403780-112403799
RBM20_PROM1	RBM20_PROM1:3	AACTCTGCCCGCCGACCCT	GTGGAAAGGACGAAACACCGAACTCTGCCCGCCGACCCTGTTTTAGAGCTAGGCCAACATGAGGATCAC	chr10:112403905-112403924
RBM20_PROM1	RBM20_PROM1:4	TGTCCTTCCCGGTGGCGCG	GTGGAAAGGACGAAACACCGTGTCCTTCCCGGTGGCGCGGTTTTAGAGCTAGGCCAACATGAGGATCAC	chr10:112404092-112404111
RBM20_PROM1	RBM20_PROM1:5	TCGCGGCGAGAGAGCTCAA	GTGGAAAGGACGAAACACCGTCGCGGCGAGAGAGCTCAAGTTTTAGAGCTAGGCCAACATGAGGATCAC	chr10:112404171-112404190
RBM20_PROM1	RBM20_PROM1:6	CCTGGTGCCCGGGCGTCCC	GTGGAAAGGACGAAACACCGCCTGGTGCCCGGGCGTCCCGTTTTAGAGCTAGGCCAACATGAGGATCAC	chr10:112404290-112404309
RBM20_PROM1	RBM20_PROM1:7	AGGGACCACGGGTGCGCCT	GTGGAAAGGACGAAACACCGAGGGACCACGGGTGCGCCTGTTTTAGAGCTAGGCCAACATGAGGATCAC	chr10:112404423-112404442
RBM20_PROM1	RBM20_PROM1:8	GACACCGACTCTGCCCAGA	GTGGAAAGGACGAAACACCGGACACCGACTCTGCCCAGAGTTTTAGAGCTAGGCCAACATGAGGATCAC	chr10:112404537-112404556
RXRA_ENH1	RXRA_ENH1:1	GAATGTCCCAGAGGCTCAG	GTGGAAAGGACGAAACACCGGAATGTCCCAGAGGCTCAGGTTTTAGAGCTAGGCCAACATGAGGATCAC	chr9:137198487-137198506
RXRA_ENH1	RXRA_ENH1:2	GGCTCCCAGAATGTCCCAG	GTGGAAAGGACGAAACACCGGGCTCCCAGAATGTCCCAGGTTTTAGAGCTAGGCCAACATGAGGATCAC	chr9:137198495-137198514
RXRA_ENH1	RXRA_ENH1:3	TGCTGGATAGGCCACGTGC	GTGGAAAGGACGAAACACCGTGCTGGATAGGCCACGTGCGTTTTAGAGCTAGGCCAACATGAGGATCAC	chr9:137198552-137198571
RXRA_ENH1	RXRA_ENH1:4	AGGGTTGTCTGCACGAGTC	GTGGAAAGGACGAAACACCGAGGGTTGTCTGCACGAGTCGTTTTAGAGCTAGGCCAACATGAGGATCAC	chr9:137198632-137198651
RXRA_ENH1	RXRA_ENH1:5	GTAAACGAGGCTCACTGGG	GTGGAAAGGACGAAACACCGGTAAACGAGGCTCACTGGGGTTTTAGAGCTAGGCCAACATGAGGATCAC	chr9:137198690-137198709
RXRA_ENH1	RXRA_ENH1:6	TTTCACAATTGCGTAGGTC	GTGGAAAGGACGAAACACCGTTTCACAATTGCGTAGGTCGTTTTAGAGCTAGGCCAACATGAGGATCAC	chr9:137198753-137198772
RXRA_ENH1	RXRA_ENH1:7	GTTCTGGTGCCGACTGTCA	GTGGAAAGGACGAAACACCGGTTCTGGTGCCGACTGTCAGTTTTAGAGCTAGGCCAACATGAGGATCAC	chr9:137198823-137198842
RXRA_ENH1	RXRA_ENH1:8	ACGGCACTTGTCCAGGAGG	GTGGAAAGGACGAAACACCGACGGCACTTGTCCAGGAGGGTTTTAGAGCTAGGCCAACATGAGGATCAC	chr9:137198871-137198890
RXRA_PROM1	RXRA_PROM1:1	GGCCGCGCAGACAATGGCC	GTGGAAAGGACGAAACACCGGGCCGCGCAGACAATGGCCGTTTTAGAGCTAGGCCAACATGAGGATCAC	chr9:137217819-137217838
RXRA_PROM1	RXRA_PROM1:2	GCGAGGAGGCGGCGTGGGA	GTGGAAAGGACGAAACACCGGCGAGGAGGCGGCGTGGGAGTTTTAGAGCTAGGCCAACATGAGGATCAC	chr9:137217982-137218001
RXRA_PROM1	RXRA_PROM1:3	CGGGCGGGCGGCGATCGCG	GTGGAAAGGACGAAACACCGCGGGCGGGCGGCGATCGCGGTTTTAGAGCTAGGCCAACATGAGGATCAC	chr9:137218065-137218084
RXRA_PROM1	RXRA_PROM1:4	CGCCGGCGGGGGGGTGGCG	GTGGAAAGGACGAAACACCGCGCCGGCGGGGGGGTGGCGGTTTTAGAGCTAGGCCAACATGAGGATCAC	chr9:137218193-137218212
RXRA_PROM1	RXRA_PROM1:5	GCAACAACTCGCCGCGCCG	GTGGAAAGGACGAAACACCGGCAACAACTCGCCGCGCCGGTTTTAGAGCTAGGCCAACATGAGGATCAC	chr9:137218324-137218343
RXRA_PROM1	RXRA_PROM1:6	CTAACTCATGCCCGGCCGG	GTGGAAAGGACGAAACACCGCTAACTCATGCCCGGCCGGGTTTTAGAGCTAGGCCAACATGAGGATCAC	chr9:137218450-137218469
RXRA_PROM1	RXRA_PROM1:7	CGCGCCGCCAACGCGCCCC	GTGGAAAGGACGAAACACCGCGCGCCGCCAACGCGCCCCGTTTTAGAGCTAGGCCAACATGAGGATCAC	chr9:137218572-137218591
RXRA_PROM1	RXRA_PROM1:8	GGCGGGTGGCAGGTTCGCC	GTGGAAAGGACGAAACACCGGGCGGGTGGCAGGTTCGCCGTTTTAGAGCTAGGCCAACATGAGGATCAC	chr9:137218738-137218757
SMAD4_PROM1	SMAD4_PROM1:1	GGTTGTAGGAGTTCACTTC	GTGGAAAGGACGAAACACCGGGTTGTAGGAGTTCACTTCGTTTTAGAGCTAGGCCAACATGAGGATCAC	chr18:48556139-48556158
SMAD4_PROM1	SMAD4_PROM1:2	GGAGAGCTCGGCGTAGAGT	GTGGAAAGGACGAAACACCGGGAGAGCTCGGCGTAGAGTGTTTTAGAGCTAGGCCAACATGAGGATCAC	chr18:48556296-48556315
SMAD4_PROM1	SMAD4_PROM1:3	AACGAGATGCCAATTTCCC	GTGGAAAGGACGAAACACCGAACGAGATGCCAATTTCCCGTTTTAGAGCTAGGCCAACATGAGGATCAC	chr18:48556339-48556358
SMAD4_PROM1	SMAD4_PROM1:4	CGTCACTCGGAGCGGGAGG	GTGGAAAGGACGAAACACCGCGTCACTCGGAGCGGGAGGGTTTTAGAGCTAGGCCAACATGAGGATCAC	chr18:48556482-48556501
SMAD4_PROM1	SMAD4_PROM1:5	CAGTGGCTTCTCGACAAGT	GTGGAAAGGACGAAACACCGCAGTGGCTTCTCGACAAGTGTTTTAGAGCTAGGCCAACATGAGGATCAC	chr18:48556587-48556606
SMAD4_PROM1	SMAD4_PROM1:6	GCCAGGCGCCCAGCGAGAG	GTGGAAAGGACGAAACACCGGCCAGGCGCCCAGCGAGAGGTTTTAGAGCTAGGCCAACATGAGGATCAC	chr18:48556765-48556784
SMAD4_PROM1	SMAD4_PROM1:7	GCGCTGAGGAGGGGCGGCC	GTGGAAAGGACGAAACACCGGCGCTGAGGAGGGGCGGCCGTTTTAGAGCTAGGCCAACATGAGGATCAC	chr18:48556848-48556867
SMAD4_PROM1	SMAD4_PROM1:8	GCGGTTACCTGGGCTCGGG	GTGGAAAGGACGAAACACCGGCGGTTACCTGGGCTCGGGGTTTTAGAGCTAGGCCAACATGAGGATCAC	chr18:48556982-48557001
SMAD6_ENH1	SMAD6_ENH1:1	CTCGGGTCCCCACCGATGC	GTGGAAAGGACGAAACACCGCTCGGGTCCCCACCGATGCGTTTTAGAGCTAGGCCAACATGAGGATCAC	chr15:66914239-66914258
SMAD6_ENH1	SMAD6_ENH1:2	CCCACCGATGCTGGCGGCC	GTGGAAAGGACGAAACACCGCCCACCGATGCTGGCGGCCGTTTTAGAGCTAGGCCAACATGAGGATCAC	chr15:66914247-66914266
SMAD6_ENH1	SMAD6_ENH1:3	CAACTCCCCGTCTGCGGAA	GTGGAAAGGACGAAACACCGCAACTCCCCGTCTGCGGAAGTTTTAGAGCTAGGCCAACATGAGGATCAC	chr15:66914303-66914322
SMAD6_ENH1	SMAD6_ENH1:4	ACCGGGTGACCGAGAGGTC	GTGGAAAGGACGAAACACCGACCGGGTGACCGAGAGGTCGTTTTAGAGCTAGGCCAACATGAGGATCAC	chr15:66914369-66914388
SMAD6_ENH1	SMAD6_ENH1:5	CCAGGCCCTCGTTTCACAG	GTGGAAAGGACGAAACACCGCCAGGCCCTCGTTTCACAGGTTTTAGAGCTAGGCCAACATGAGGATCAC	chr15:66914432-66914451
SMAD6_ENH1	SMAD6_ENH1:6	AGGGAAGCCCACGGCCGGG	GTGGAAAGGACGAAACACCGAGGGAAGCCCACGGCCGGGGTTTTAGAGCTAGGCCAACATGAGGATCAC	chr15:66914524-66914543
SMAD6_ENH1	SMAD6_ENH1:7	AGGGCGCCTCTATCTCCCG	GTGGAAAGGACGAAACACCGAGGGCGCCTCTATCTCCCGGTTTTAGAGCTAGGCCAACATGAGGATCAC	chr15:66914577-66914596
SMAD6_ENH1	SMAD6_ENH1:8	ATAACGCCCAGGGCTCGGG	GTGGAAAGGACGAAACACCGATAACGCCCAGGGCTCGGGGTTTTAGAGCTAGGCCAACATGAGGATCAC	chr15:66914624-66914643
SMAD6_ENH2	SMAD6_ENH2:1	CAGCAGGCATGCAAGCAGT	GTGGAAAGGACGAAACACCGCAGCAGGCATGCAAGCAGTGTTTTAGAGCTAGGCCAACATGAGGATCAC	chr15:66913562-66913581
SMAD6_ENH2	SMAD6_ENH2:2	CTTCCTGGAAAATCCTTTC	GTGGAAAGGACGAAACACCGCTTCCTGGAAAATCCTTTCGTTTTAGAGCTAGGCCAACATGAGGATCAC	chr15:66913653-66913672
SMAD6_ENH2	SMAD6_ENH2:3	ATAAAGAGTGAAGTCCTTG	GTGGAAAGGACGAAACACCGATAAAGAGTGAAGTCCTTGGTTTTAGAGCTAGGCCAACATGAGGATCAC	chr15:66913683-66913702
SMAD6_ENH2	SMAD6_ENH2:4	GCGGGCAAGCTGTGTGCAG	GTGGAAAGGACGAAACACCGGCGGGCAAGCTGTGTGCAGGTTTTAGAGCTAGGCCAACATGAGGATCAC	chr15:66913793-66913812
SMAD6_ENH2	SMAD6_ENH2:5	CACCTGCACGGGGATGAGG	GTGGAAAGGACGAAACACCGCACCTGCACGGGGATGAGGGTTTTAGAGCTAGGCCAACATGAGGATCAC	chr15:66913830-66913849
SMAD6_ENH2	SMAD6_ENH2:6	TCGCATTCAAAGCCTGTCC	GTGGAAAGGACGAAACACCGTCGCATTCAAAGCCTGTCCGTTTTAGAGCTAGGCCAACATGAGGATCAC	chr15:66913868-66913887
SMAD6_ENH2	SMAD6_ENH2:7	GGTGGGGTTCCGGAAATCC	GTGGAAAGGACGAAACACCGGGTGGGGTTCCGGAAATCCGTTTTAGAGCTAGGCCAACATGAGGATCAC	chr15:66913973-66913992
SMAD6_ENH2	SMAD6_ENH2:8	TCCTCGGAGAAACAGCTCT	GTGGAAAGGACGAAACACCGTCCTCGGAGAAACAGCTCTGTTTTAGAGCTAGGCCAACATGAGGATCAC	chr15:66913994-66914013
SMAD6_PROM1	SMAD6_PROM1:1	TGAGACTCGGACGCAAACG	GTGGAAAGGACGAAACACCGTGAGACTCGGACGCAAACGGTTTTAGAGCTAGGCCAACATGAGGATCAC	chr15:66994226-66994245
SMAD6_PROM1	SMAD6_PROM1:2	GCGAGCACACACGCGCGCG	GTGGAAAGGACGAAACACCGGCGAGCACACACGCGCGCGGTTTTAGAGCTAGGCCAACATGAGGATCAC	chr15:66994315-66994334
SMAD6_PROM1	SMAD6_PROM1:3	CAGGGCCGGAGGCTCCAAG	GTGGAAAGGACGAAACACCGCAGGGCCGGAGGCTCCAAGGTTTTAGAGCTAGGCCAACATGAGGATCAC	chr15:66994460-66994479
SMAD6_PROM1	SMAD6_PROM1:4	GCCGCCAAAGTGTCTAGAC	GTGGAAAGGACGAAACACCGGCCGCCAAAGTGTCTAGACGTTTTAGAGCTAGGCCAACATGAGGATCAC	chr15:66994550-66994569
SMAD6_PROM1	SMAD6_PROM1:5	GCCCGGCGGCTCTTTCTCT	GTGGAAAGGACGAAACACCGGCCCGGCGGCTCTTTCTCTGTTTTAGAGCTAGGCCAACATGAGGATCAC	chr15:66994693-66994712
SMAD6_PROM1	SMAD6_PROM1:6	GAAGCGTCCGAGGGCAGCG	GTGGAAAGGACGAAACACCGGAAGCGTCCGAGGGCAGCGGTTTTAGAGCTAGGCCAACATGAGGATCAC	chr15:66994805-66994824
SMAD6_PROM1	SMAD6_PROM1:7	ACTTGGAGCGAGTTTCTCC	GTGGAAAGGACGAAACACCGACTTGGAGCGAGTTTCTCCGTTTTAGAGCTAGGCCAACATGAGGATCAC	chr15:66994933-66994952
SMAD6_PROM1	SMAD6_PROM1:8	GCCTGCCTTTCGGATCCTG	GTGGAAAGGACGAAACACCGGCCTGCCTTTCGGATCCTGGTTTTAGAGCTAGGCCAACATGAGGATCAC	chr15:66995098-66995117
TBX5_PROM1	TBX5_PROM1:1	CTCCTAGCAGGGAAGCCGG	GTGGAAAGGACGAAACACCGCTCCTAGCAGGGAAGCCGGGTTTTAGAGCTAGGCCAACATGAGGATCAC	chr12:114843473-114843492
TBX5_PROM1	TBX5_PROM1:2	GCGGTAGGTGCGCCCTAGT	GTGGAAAGGACGAAACACCGGCGGTAGGTGCGCCCTAGTGTTTTAGAGCTAGGCCAACATGAGGATCAC	chr12:114843575-114843594
TBX5_PROM1	TBX5_PROM1:3	ATATGGTTGCCGGTGCTCT	GTGGAAAGGACGAAACACCGATATGGTTGCCGGTGCTCTGTTTTAGAGCTAGGCCAACATGAGGATCAC	chr12:114843706-114843725
TBX5_PROM1	TBX5_PROM1:4	TGACTCTTACCTCGAATCC	GTGGAAAGGACGAAACACCGTGACTCTTACCTCGAATCCGTTTTAGAGCTAGGCCAACATGAGGATCAC	chr12:114843831-114843850
TBX5_PROM1	TBX5_PROM1:5	GAGGGCGACAGAGTGCAGT	GTGGAAAGGACGAAACACCGGAGGGCGACAGAGTGCAGTGTTTTAGAGCTAGGCCAACATGAGGATCAC	chr12:114843974-114843993
TBX5_PROM1	TBX5_PROM1:6	AAATCATTTCAAACGCGGT	GTGGAAAGGACGAAACACCGAAATCATTTCAAACGCGGTGTTTTAGAGCTAGGCCAACATGAGGATCAC	chr12:114844186-114844205
TBX5_PROM1	TBX5_PROM1:7	CGGTGCAGAGAACCGAGTC	GTGGAAAGGACGAAACACCGCGGTGCAGAGAACCGAGTCGTTTTAGAGCTAGGCCAACATGAGGATCAC	chr12:114844241-114844260
TBX5_PROM1	TBX5_PROM1:8	AAGGCGAGCGCCGGCCAGG	GTGGAAAGGACGAAACACCGAAGGCGAGCGCCGGCCAGGGTTTTAGAGCTAGGCCAACATGAGGATCAC	chr12:114844353-114844372
TBX5_PROM2	TBX5_PROM2:1	ATTCAGCAAGACTAAGACG	GTGGAAAGGACGAAACACCGATTCAGCAAGACTAAGACGGTTTTAGAGCTAGGCCAACATGAGGATCAC	chr12:114845525-114845544
TBX5_PROM2	TBX5_PROM2:2	CTTTTGCGCTCCAAAGAAG	GTGGAAAGGACGAAACACCGCTTTTGCGCTCCAAAGAAGGTTTTAGAGCTAGGCCAACATGAGGATCAC	chr12:114845635-114845654
TBX5_PROM2	TBX5_PROM2:3	GCACGTACCTCCCAGCTCA	GTGGAAAGGACGAAACACCGGCACGTACCTCCCAGCTCAGTTTTAGAGCTAGGCCAACATGAGGATCAC	chr12:114845761-114845780
TBX5_PROM2	TBX5_PROM2:4	GTCCTATAGGTGCAGCGGC	GTGGAAAGGACGAAACACCGGTCCTATAGGTGCAGCGGCGTTTTAGAGCTAGGCCAACATGAGGATCAC	chr12:114845881-114845900
TBX5_PROM2	TBX5_PROM2:5	CCACAGGTTCCGGACGTCT	GTGGAAAGGACGAAACACCGCCACAGGTTCCGGACGTCTGTTTTAGAGCTAGGCCAACATGAGGATCAC	chr12:114846014-114846033
TBX5_PROM2	TBX5_PROM2:6	GGGAACTCTTCACGAAGGG	GTGGAAAGGACGAAACACCGGGGAACTCTTCACGAAGGGGTTTTAGAGCTAGGCCAACATGAGGATCAC	chr12:114846149-114846168
TBX5_PROM2	TBX5_PROM2:7	ATCCCCCGCGGAGGAGCTC	GTGGAAAGGACGAAACACCGATCCCCCGCGGAGGAGCTCGTTTTAGAGCTAGGCCAACATGAGGATCAC	chr12:114846278-114846297
TBX5_PROM2	TBX5_PROM2:8	AATAATTACTGGGTTGTCG	GTGGAAAGGACGAAACACCGAATAATTACTGGGTTGTCGGTTTTAGAGCTAGGCCAACATGAGGATCAC	chr12:114846381-114846400
TGFB1_ENH1	TGFB1_ENH1:1	AGCGGGATTCCTAGCTCCC	GTGGAAAGGACGAAACACCGAGCGGGATTCCTAGCTCCCGTTTTAGAGCTAGGCCAACATGAGGATCAC	chr19:41933090-41933109
TGFB1_ENH1	TGFB1_ENH1:2	CCCATGCTTTTTTACCTCT	GTGGAAAGGACGAAACACCGCCCATGCTTTTTTACCTCTGTTTTAGAGCTAGGCCAACATGAGGATCAC	chr19:41933173-41933192
TGFB1_ENH1	TGFB1_ENH1:3	CTGACCTGAGGCCGGCACC	GTGGAAAGGACGAAACACCGCTGACCTGAGGCCGGCACCGTTTTAGAGCTAGGCCAACATGAGGATCAC	chr19:41933215-41933234
TGFB1_ENH1	TGFB1_ENH1:4	CTGCCCAGCCAGTCCAGAG	GTGGAAAGGACGAAACACCGCTGCCCAGCCAGTCCAGAGGTTTTAGAGCTAGGCCAACATGAGGATCAC	chr19:41933300-41933319
TGFB1_ENH1	TGFB1_ENH1:5	CGGGAGCAGGGAGGGCCCC	GTGGAAAGGACGAAACACCGCGGGAGCAGGGAGGGCCCCGTTTTAGAGCTAGGCCAACATGAGGATCAC	chr19:41933339-41933358
TGFB1_ENH1	TGFB1_ENH1:6	AGGAGGCCGACCTGAGAGA	GTGGAAAGGACGAAACACCGAGGAGGCCGACCTGAGAGAGTTTTAGAGCTAGGCCAACATGAGGATCAC	chr19:41933416-41933435
TGFB1_ENH1	TGFB1_ENH1:7	ACAAGACGGGGGCTTTGTG	GTGGAAAGGACGAAACACCGACAAGACGGGGGCTTTGTGGTTTTAGAGCTAGGCCAACATGAGGATCAC	chr19:41933505-41933524
TGFB1_ENH1	TGFB1_ENH1:8	GCCTGGGAGGGGAGAACCA	GTGGAAAGGACGAAACACCGGCCTGGGAGGGGAGAACCAGTTTTAGAGCTAGGCCAACATGAGGATCAC	chr19:41933526-41933545
TGFB1_PROM1	TGFB1_PROM1:1	GCCGGGTCGGCGACTCCCG	GTGGAAAGGACGAAACACCGGCCGGGTCGGCGACTCCCGGTTTTAGAGCTAGGCCAACATGAGGATCAC	chr19:41859336-41859355
TGFB1_PROM1	TGFB1_PROM1:2	CGCTGCCCCGCGAGGAGGC	GTGGAAAGGACGAAACACCGCGCTGCCCCGCGAGGAGGCGTTTTAGAGCTAGGCCAACATGAGGATCAC	chr19:41859460-41859479
TGFB1_PROM1	TGFB1_PROM1:3	CGCCCCCGCCACTGCGGGG	GTGGAAAGGACGAAACACCGCGCCCCCGCCACTGCGGGGGTTTTAGAGCTAGGCCAACATGAGGATCAC	chr19:41859594-41859613
TGFB1_PROM1	TGFB1_PROM1:4	GCCGGGGGGGTGCCCCGGA	GTGGAAAGGACGAAACACCGGCCGGGGGGGTGCCCCGGAGTTTTAGAGCTAGGCCAACATGAGGATCAC	chr19:41859707-41859726
TGFB1_PROM1	TGFB1_PROM1:5	GGGGTTTTGAAGCCGCCCC	GTGGAAAGGACGAAACACCGGGGGTTTTGAAGCCGCCCCGTTTTAGAGCTAGGCCAACATGAGGATCAC	chr19:41859848-41859867
TGFB1_PROM1	TGFB1_PROM1:6	CGGCTCCGCCCCGCAAACA	GTGGAAAGGACGAAACACCGCGGCTCCGCCCCGCAAACAGTTTTAGAGCTAGGCCAACATGAGGATCAC	chr19:41860012-41860031
TGFB1_PROM1	TGFB1_PROM1:7	AAAGAGGACCAGGCGGAGA	GTGGAAAGGACGAAACACCGAAAGAGGACCAGGCGGAGAGTTTTAGAGCTAGGCCAACATGAGGATCAC	chr19:41860116-41860135
TGFB1_PROM1	TGFB1_PROM1:8	AAGAGGGTCTGTCAACATG	GTGGAAAGGACGAAACACCGAAGAGGGTCTGTCAACATGGTTTTAGAGCTAGGCCAACATGAGGATCAC	chr19:41860227-41860246
TNNT2_ENH2	TNNT2_ENH2:1	GTGTCATCCTTGTCCCTCC	GTGGAAAGGACGAAACACCGGTGTCATCCTTGTCCCTCCGTTTTAGAGCTAGGCCAACATGAGGATCAC	chr1:201395523-201395542
TNNT2_ENH2	TNNT2_ENH2:2	TTACAAGGCTTAGCTCCTC	GTGGAAAGGACGAAACACCGTTACAAGGCTTAGCTCCTCGTTTTAGAGCTAGGCCAACATGAGGATCAC	chr1:201395587-201395606
TNNT2_ENH2	TNNT2_ENH2:3	GGCTGACACCTGTCAGCCC	GTGGAAAGGACGAAACACCGGGCTGACACCTGTCAGCCCGTTTTAGAGCTAGGCCAACATGAGGATCAC	chr1:201395643-201395662
TNNT2_ENH2	TNNT2_ENH2:4	GGGCCGCCGGGAAGACAGA	GTGGAAAGGACGAAACACCGGGGCCGCCGGGAAGACAGAGTTTTAGAGCTAGGCCAACATGAGGATCAC	chr1:201395727-201395746
TNNT2_ENH2	TNNT2_ENH2:5	CGGGAGGGCCGGTGTCGGG	GTGGAAAGGACGAAACACCGCGGGAGGGCCGGTGTCGGGGTTTTAGAGCTAGGCCAACATGAGGATCAC	chr1:201395748-201395767
TNNT2_ENH2	TNNT2_ENH2:6	CCCCCTGTTAAGCCCATCG	GTGGAAAGGACGAAACACCGCCCCCTGTTAAGCCCATCGGTTTTAGAGCTAGGCCAACATGAGGATCAC	chr1:201395833-201395852
TNNT2_ENH2	TNNT2_ENH2:7	CTGAGGGGACTAGAGCAGA	GTGGAAAGGACGAAACACCGCTGAGGGGACTAGAGCAGAGTTTTAGAGCTAGGCCAACATGAGGATCAC	chr1:201395907-201395926
TNNT2_ENH2	TNNT2_ENH2:8	ATTTGTGGTGAAAAATTGA	GTGGAAAGGACGAAACACCGATTTGTGGTGAAAAATTGAGTTTTAGAGCTAGGCCAACATGAGGATCAC	chr1:201395955-201395974
TNNT2_ENH3	TNNT2_ENH3:1	ACGGCCTAGGGAGGCGCGG	GTGGAAAGGACGAAACACCGACGGCCTAGGGAGGCGCGGGTTTTAGAGCTAGGCCAACATGAGGATCAC	chr1:201438198-201438217
TNNT2_ENH3	TNNT2_ENH3:2	AGAGAACGGGCGGGCGGTG	GTGGAAAGGACGAAACACCGAGAGAACGGGCGGGCGGTGGTTTTAGAGCTAGGCCAACATGAGGATCAC	chr1:201438223-201438242
TNNT2_ENH3	TNNT2_ENH3:3	CGAGCGGCGGAACATGTAA	GTGGAAAGGACGAAACACCGCGAGCGGCGGAACATGTAAGTTTTAGAGCTAGGCCAACATGAGGATCAC	chr1:201438294-201438313
TNNT2_ENH3	TNNT2_ENH3:4	GCTGGTGCGCGGCGCGGAG	GTGGAAAGGACGAAACACCGGCTGGTGCGCGGCGCGGAGGTTTTAGAGCTAGGCCAACATGAGGATCAC	chr1:201438363-201438382
TNNT2_ENH3	TNNT2_ENH3:5	GAGGGCCGGGACTGAGAGG	GTGGAAAGGACGAAACACCGGAGGGCCGGGACTGAGAGGGTTTTAGAGCTAGGCCAACATGAGGATCAC	chr1:201438455-201438474
TNNT2_ENH3	TNNT2_ENH3:6	GCTGCCGTCTGCCGCTTCT	GTGGAAAGGACGAAACACCGGCTGCCGTCTGCCGCTTCTGTTTTAGAGCTAGGCCAACATGAGGATCAC	chr1:201438505-201438524
TNNT2_ENH3	TNNT2_ENH3:7	CCCCAGGCCTTGAATGAAG	GTGGAAAGGACGAAACACCGCCCCAGGCCTTGAATGAAGGTTTTAGAGCTAGGCCAACATGAGGATCAC	chr1:201438538-201438557
TNNT2_ENH3	TNNT2_ENH3:8	GCAGCGCGCTCTCCAATCG	GTGGAAAGGACGAAACACCGGCAGCGCGCTCTCCAATCGGTTTTAGAGCTAGGCCAACATGAGGATCAC	chr1:201438597-201438616
TNNT2_PROM1	TNNT2_PROM1:1	ATTGCTTGTTCCAGGCCGA	GTGGAAAGGACGAAACACCGATTGCTTGTTCCAGGCCGAGTTTTAGAGCTAGGCCAACATGAGGATCAC	chr1:201346334-201346353
TNNT2_PROM1	TNNT2_PROM1:2	TGCTCTATTGTACCAATCT	GTGGAAAGGACGAAACACCGTGCTCTATTGTACCAATCTGTTTTAGAGCTAGGCCAACATGAGGATCAC	chr1:201346560-201346579
TNNT2_PROM1	TNNT2_PROM1:3	GAGGACAGGTTGCCAGGTC	GTGGAAAGGACGAAACACCGGAGGACAGGTTGCCAGGTCGTTTTAGAGCTAGGCCAACATGAGGATCAC	chr1:201346588-201346607
TNNT2_PROM1	TNNT2_PROM1:4	AGACGCCTCCAGGATCTGT	GTGGAAAGGACGAAACACCGAGACGCCTCCAGGATCTGTGTTTTAGAGCTAGGCCAACATGAGGATCAC	chr1:201346769-201346788
TNNT2_PROM1	TNNT2_PROM1:5	TTTAAGCAGGCATGTGGGC	GTGGAAAGGACGAAACACCGTTTAAGCAGGCATGTGGGCGTTTTAGAGCTAGGCCAACATGAGGATCAC	chr1:201346833-201346852
TNNT2_PROM1	TNNT2_PROM1:6	CACGCCATATAAGCCCATG	GTGGAAAGGACGAAACACCGCACGCCATATAAGCCCATGGTTTTAGAGCTAGGCCAACATGAGGATCAC	chr1:201346991-201347010
TNNT2_PROM1	TNNT2_PROM1:7	CCAGCAACCCAGGCCTGGG	GTGGAAAGGACGAAACACCGCCAGCAACCCAGGCCTGGGGTTTTAGAGCTAGGCCAACATGAGGATCAC	chr1:201347119-201347138
TNNT2_PROM1	TNNT2_PROM1:8	CTCCACTTGAACTGATGCT	GTGGAAAGGACGAAACACCGCTCCACTTGAACTGATGCTGTTTTAGAGCTAGGCCAACATGAGGATCAC	chr1:201347243-201347262
ZIC2_PROM1	ZIC2_PROM1:1	CGGTTATTGTTCGGAGCCG	GTGGAAAGGACGAAACACCGCGGTTATTGTTCGGAGCCGGTTTTAGAGCTAGGCCAACATGAGGATCAC	chr13:100633551-100633570
ZIC2_PROM1	ZIC2_PROM1:2	CTCCACCTGACCGCGGCGG	GTGGAAAGGACGAAACACCGCTCCACCTGACCGCGGCGGGTTTTAGAGCTAGGCCAACATGAGGATCAC	chr13:100633670-100633689
ZIC2_PROM1	ZIC2_PROM1:3	GCATTCTACCGGCGCTGCT	GTGGAAAGGACGAAACACCGGCATTCTACCGGCGCTGCTGTTTTAGAGCTAGGCCAACATGAGGATCAC	chr13:100633787-100633806
ZIC2_PROM1	ZIC2_PROM1:4	TATTAAAGGAGCTGCGGCG	GTGGAAAGGACGAAACACCGTATTAAAGGAGCTGCGGCGGTTTTAGAGCTAGGCCAACATGAGGATCAC	chr13:100633994-100634013
ZIC2_PROM1	ZIC2_PROM1:5	GCGTAGCGAAGGCGCGGAG	GTGGAAAGGACGAAACACCGGCGTAGCGAAGGCGCGGAGGTTTTAGAGCTAGGCCAACATGAGGATCAC	chr13:100634101-100634120
ZIC2_PROM1	ZIC2_PROM1:6	GCGCAGGAGAGCGGCTCCC	GTGGAAAGGACGAAACACCGGCGCAGGAGAGCGGCTCCCGTTTTAGAGCTAGGCCAACATGAGGATCAC	chr13:100634164-100634183
ZIC2_PROM1	ZIC2_PROM1:7	GGCGCAGGGCTCGCAGGGG	GTGGAAAGGACGAAACACCGGGCGCAGGGCTCGCAGGGGGTTTTAGAGCTAGGCCAACATGAGGATCAC	chr13:100634281-100634300
ZIC2_PROM1	ZIC2_PROM1:8	GCGGCTGCCGCCGAGATGC	GTGGAAAGGACGAAACACCGGCGGCTGCCGCCGAGATGCGTTTTAGAGCTAGGCCAACATGAGGATCAC	chr13:100634405-100634424

## Sheet: Initial_Screen_Filt_sgRNA_List
Target	sgName	seq	oligo	position(hg19)
MALAT1	MALAT1	GCGCTGCGCTTAAGAGGGC	GTGGAAAGGACGAAACACCGGCGCTGCGCTTAAGAGGGCGTTTTAGAGCTAGGCCAACATGAGGATCAC	chr11:65265266-65265285
NC:1	NC:1	GTTCCGCGTTACATAACTTA	GTGGAAAGGACGAAACACCGGTTCCGCGTTACATAACTTAGTTTTAGAGCTAGGCCAACATGAGGATCAC	na
NC:2	NC:2	TGTGAGTTAGCTCACTCATT	GTGGAAAGGACGAAACACCGTGTGAGTTAGCTCACTCATTGTTTTAGAGCTAGGCCAACATGAGGATCAC	na
NC:3	NC:3	GGAGCGCACCATCTTCTTCA	GTGGAAAGGACGAAACACCGGGAGCGCACCATCTTCTTCAGTTTTAGAGCTAGGCCAACATGAGGATCAC	na
NC:4	NC:4	GTGAACCGCATCGAGCTGAA	GTGGAAAGGACGAAACACCGGTGAACCGCATCGAGCTGAAGTTTTAGAGCTAGGCCAACATGAGGATCAC	na
TBXEnh1	TBXEnh1:2	GAGGACAACGAGGGCTGGG	GTGGAAAGGACGAAACACCGGAGGACAACGAGGGCTGGGGTTTTAGAGCTAGGCCAACATGAGGATCAC	chr12:114853441-114853460
TBXEnh1	TBXEnh1:3	AGAACAGCACCCGCCAGGA	GTGGAAAGGACGAAACACCGAGAACAGCACCCGCCAGGAGTTTTAGAGCTAGGCCAACATGAGGATCAC	chr12:114853548-114853567
TBXEnh1	TBXEnh1:4	TGGGAATTCACCGATGACG	GTGGAAAGGACGAAACACCGTGGGAATTCACCGATGACGGTTTTAGAGCTAGGCCAACATGAGGATCAC	chr12:114853650-114853669
TBXEnh1	TBXEnh1:5	ACAGACACGCACAACTTCC	GTGGAAAGGACGAAACACCGACAGACACGCACAACTTCCGTTTTAGAGCTAGGCCAACATGAGGATCAC	chr12:114853773-114853792
TBXEnh1	TBXEnh1:6	GCCTTAGAGCCCGGCCGCT	GTGGAAAGGACGAAACACCGGCCTTAGAGCCCGGCCGCTGTTTTAGAGCTAGGCCAACATGAGGATCAC	chr12:114853932-114853951
TBXEnh1	TBXEnh1:7	AACAGCCCCTACCTCCCAG	GTGGAAAGGACGAAACACCGAACAGCCCCTACCTCCCAGGTTTTAGAGCTAGGCCAACATGAGGATCAC	chr12:114854055-114854074
TBXEnh2	TBXEnh2:3	ACAACAGGCCGATAGTGTC	GTGGAAAGGACGAAACACCGACAACAGGCCGATAGTGTCGTTTTAGAGCTAGGCCAACATGAGGATCAC	chr15:90734910-90734929
TBXEnh2	TBXEnh2:4	GCCTGACCTGGAGATGCTG	GTGGAAAGGACGAAACACCGGCCTGACCTGGAGATGCTGGTTTTAGAGCTAGGCCAACATGAGGATCAC	chr15:90735035-90735054
TBXEnh2	TBXEnh2:5	AAGGCGTCCCTGCTCTTTG	GTGGAAAGGACGAAACACCGAAGGCGTCCCTGCTCTTTGGTTTTAGAGCTAGGCCAACATGAGGATCAC	chr15:90735105-90735124
TBXEnh2	TBXEnh2:6	TCAGGGTTGAGCTAAAAAC	GTGGAAAGGACGAAACACCGTCAGGGTTGAGCTAAAAACGTTTTAGAGCTAGGCCAACATGAGGATCAC	chr15:90735261-90735280
TBXEnh2	TBXEnh2:7	GACAAGTTGCAGTTTCAAG	GTGGAAAGGACGAAACACCGGACAAGTTGCAGTTTCAAGGTTTTAGAGCTAGGCCAACATGAGGATCAC	chr15:90735368-90735387
TBXEnh2	TBXEnh2:8	GCTCACTCTCTCTATCTTG	GTGGAAAGGACGAAACACCGGCTCACTCTCTCTATCTTGGTTTTAGAGCTAGGCCAACATGAGGATCAC	chr15:90735497-90735516
TBXEnh3	TBXEnh3:2	AAATGTCACAGGGCCAGGC	GTGGAAAGGACGAAACACCGAAATGTCACAGGGCCAGGCGTTTTAGAGCTAGGCCAACATGAGGATCAC	chr16:57302774-57302793
TBXEnh3	TBXEnh3:3	GGAAGTCAGATAGTGGGGC	GTGGAAAGGACGAAACACCGGGAAGTCAGATAGTGGGGCGTTTTAGAGCTAGGCCAACATGAGGATCAC	chr16:57302854-57302873
TBXEnh3	TBXEnh3:4	CATTAAGTGATAACTCCAT	GTGGAAAGGACGAAACACCGCATTAAGTGATAACTCCATGTTTTAGAGCTAGGCCAACATGAGGATCAC	chr16:57302927-57302946
TBXEnh3	TBXEnh3:5	GCCGAGGTTTCCTTCCAGT	GTGGAAAGGACGAAACACCGGCCGAGGTTTCCTTCCAGTGTTTTAGAGCTAGGCCAACATGAGGATCAC	chr16:57303045-57303064
TBXEnh3	TBXEnh3:6	ACAGGGAACATTCCAACCG	GTGGAAAGGACGAAACACCGACAGGGAACATTCCAACCGGTTTTAGAGCTAGGCCAACATGAGGATCAC	chr16:57303141-57303160
TBXEnh3	TBXEnh3:7	GTGAATGGGGTATGCACCC	GTGGAAAGGACGAAACACCGGTGAATGGGGTATGCACCCGTTTTAGAGCTAGGCCAACATGAGGATCAC	chr16:57303217-57303236
TBXEnh3	TBXEnh3:8	GATTTGGAAACCAACACTG	GTGGAAAGGACGAAACACCGGATTTGGAAACCAACACTGGTTTTAGAGCTAGGCCAACATGAGGATCAC	chr16:57303266-57303285
TBXEnh4	TBXEnh4:3	AGGAGGTACTGGGTAGAGC	GTGGAAAGGACGAAACACCGAGGAGGTACTGGGTAGAGCGTTTTAGAGCTAGGCCAACATGAGGATCAC	chr20:1305890-1305909
TBXEnh4	TBXEnh4:4	AACGCTGTCTTACAAACCC	GTGGAAAGGACGAAACACCGAACGCTGTCTTACAAACCCGTTTTAGAGCTAGGCCAACATGAGGATCAC	chr20:1305958-1305977
TBXEnh4	TBXEnh4:5	TGGCATTTGTCAAAGGAAG	GTGGAAAGGACGAAACACCGTGGCATTTGTCAAAGGAAGGTTTTAGAGCTAGGCCAACATGAGGATCAC	chr20:1305998-1306017
TBXEnh4	TBXEnh4:6	AGCAGTGTCCACTTTGGGA	GTGGAAAGGACGAAACACCGAGCAGTGTCCACTTTGGGAGTTTTAGAGCTAGGCCAACATGAGGATCAC	chr20:1306049-1306068
TBXEnh4	TBXEnh4:7	TCAGGCCCAGCCTTCGGGG	GTGGAAAGGACGAAACACCGTCAGGCCCAGCCTTCGGGGGTTTTAGAGCTAGGCCAACATGAGGATCAC	chr20:1306217-1306236
TBXEnh4	TBXEnh4:8	GAGGCAGCACTGCTACAGG	GTGGAAAGGACGAAACACCGGAGGCAGCACTGCTACAGGGTTTTAGAGCTAGGCCAACATGAGGATCAC	chr20:1306398-1306417
TBXEnh5	TBXEnh5:1	GTTGCCAACATTACAGGGA	GTGGAAAGGACGAAACACCGGTTGCCAACATTACAGGGAGTTTTAGAGCTAGGCCAACATGAGGATCAC	chr20:42780215-42780234
TBXEnh5	TBXEnh5:2	TTAGACACACTATAGCTCT	GTGGAAAGGACGAAACACCGTTAGACACACTATAGCTCTGTTTTAGAGCTAGGCCAACATGAGGATCAC	chr20:42780294-42780313
TBXEnh5	TBXEnh5:3	CTATAATTACCGTCATCTT	GTGGAAAGGACGAAACACCGCTATAATTACCGTCATCTTGTTTTAGAGCTAGGCCAACATGAGGATCAC	chr20:42780349-42780368
TBXEnh5	TBXEnh5:5	TATACCCCCATCTCATGTC	GTGGAAAGGACGAAACACCGTATACCCCCATCTCATGTCGTTTTAGAGCTAGGCCAACATGAGGATCAC	chr20:42780484-42780503
TBXEnh5	TBXEnh5:6	CTGGGCTTTGACATACACT	GTGGAAAGGACGAAACACCGCTGGGCTTTGACATACACTGTTTTAGAGCTAGGCCAACATGAGGATCAC	chr20:42780604-42780623
TBXEnh5	TBXEnh5:7	CTCTCTCAAGTTCCGAGGT	GTGGAAAGGACGAAACACCGCTCTCTCAAGTTCCGAGGTGTTTTAGAGCTAGGCCAACATGAGGATCAC	chr20:42780751-42780770
TBXEnh6	TBXEnh6:1	TGCCCCCCCCTCCTTTTAT	GTGGAAAGGACGAAACACCGTGCCCCCCCCTCCTTTTATGTTTTAGAGCTAGGCCAACATGAGGATCAC	chr7:4835895-4835914
TBXEnh6	TBXEnh6:2	ATATAGACTCGGGTGGCCC	GTGGAAAGGACGAAACACCGATATAGACTCGGGTGGCCCGTTTTAGAGCTAGGCCAACATGAGGATCAC	chr7:4835941-4835960
TBXEnh6	TBXEnh6:4	TGCCTCCAATACTGCAAAG	GTGGAAAGGACGAAACACCGTGCCTCCAATACTGCAAAGGTTTTAGAGCTAGGCCAACATGAGGATCAC	chr7:4836015-4836034
TBXEnh6	TBXEnh6:5	TCCCCGGGCACACACCTCC	GTGGAAAGGACGAAACACCGTCCCCGGGCACACACCTCCGTTTTAGAGCTAGGCCAACATGAGGATCAC	chr7:4836046-4836065
TBXEnh6	TBXEnh6:6	CTGTGAACCCTCGGGGACA	GTGGAAAGGACGAAACACCGCTGTGAACCCTCGGGGACAGTTTTAGAGCTAGGCCAACATGAGGATCAC	chr7:4836174-4836193
TBXEnh6	TBXEnh6:8	ATCTCACTGCTTGACCCCT	GTGGAAAGGACGAAACACCGATCTCACTGCTTGACCCCTGTTTTAGAGCTAGGCCAACATGAGGATCAC	chr7:4836300-4836319
TBX5_AS1_P1	TBX5_AS1_P1:1	AATAAAGACATAAACCAACC	GTGGAAAGGACGAAACACCGAATAAAGACATAAACCAACCGTTTTAGAGCTAGGCCAACATGAGGATCAC	chr12:114845771-114845791
TBX5_AS1_P1	TBX5_AS1_P1:2	GATCGACTTTCTTAGGAAGG	GTGGAAAGGACGAAACACCGGATCGACTTTCTTAGGAAGGGTTTTAGAGCTAGGCCAACATGAGGATCAC	chr12:114845602-114845622
TBX5_AS1_P1	TBX5_AS1_P1:3	AGGAAATCGAGTTGTTCCGG	GTGGAAAGGACGAAACACCGAGGAAATCGAGTTGTTCCGGGTTTTAGAGCTAGGCCAACATGAGGATCAC	chr12:114845631-114845651
TBX5_AS1_P1	TBX5_AS1_P1:4	TATTATTTTTAAATCCCCCG	GTGGAAAGGACGAAACACCGTATTATTTTTAAATCCCCCGGTTTTAGAGCTAGGCCAACATGAGGATCAC	chr12:114845745-114845765
TBX5_AS1_P1	TBX5_AS1_P1:5	GTTCTCCGTAATGTGCCTTG	GTGGAAAGGACGAAACACCGGTTCTCCGTAATGTGCCTTGGTTTTAGAGCTAGGCCAACATGAGGATCAC	chr12:114845390-114845410
TBX5_AS1_P2	TBX5_AS1_P2:1	TATTGTACCAGGGCCCGCCG	GTGGAAAGGACGAAACACCGTATTGTACCAGGGCCCGCCGGTTTTAGAGCTAGGCCAACATGAGGATCAC	chr12:114843931-114843951
TBX5_AS1_P2	TBX5_AS1_P2:2	ACAATTTCTAAGCAGCGCAG	GTGGAAAGGACGAAACACCGACAATTTCTAAGCAGCGCAGGTTTTAGAGCTAGGCCAACATGAGGATCAC	chr12:114843472-114843492
TBX5_AS1_P2	TBX5_AS1_P2:3	TACCGCGTAGACGCCCCTGG	GTGGAAAGGACGAAACACCGTACCGCGTAGACGCCCCTGGGTTTTAGAGCTAGGCCAACATGAGGATCAC	chr12:114843540-114843560
TBX5_AS1_P2	TBX5_AS1_P2:4	GAATCGAACCCCGAAGCTGG	GTGGAAAGGACGAAACACCGGAATCGAACCCCGAAGCTGGGTTTTAGAGCTAGGCCAACATGAGGATCAC	chr12:114843449-114843469
TBX5_AS1_P2	TBX5_AS1_P2:5	GAGCCAAGGTCAGGCCCGCG	GTGGAAAGGACGAAACACCGGAGCCAAGGTCAGGCCCGCGGTTTTAGAGCTAGGCCAACATGAGGATCAC	chr12:114843585-114843605
TBX5_P1	TBX5_P1:1	CAAACCAACCTTGAGCTGGG	GTGGAAAGGACGAAACACCGCAAACCAACCTTGAGCTGGGGTTTTAGAGCTAGGCCAACATGAGGATCAC	chr12:114846047-114846067
TBX5_P1	TBX5_P1:2	GGAGGTGAGTTTCACCCTGG	GTGGAAAGGACGAAACACCGGGAGGTGAGTTTCACCCTGGGTTTTAGAGCTAGGCCAACATGAGGATCAC	chr12:114846120-114846140
TBX5_P1	TBX5_P1:3	TTGCGCTCCAAAGAAGAGGT	GTGGAAAGGACGAAACACCGTTGCGCTCCAAAGAAGAGGTGTTTTAGAGCTAGGCCAACATGAGGATCAC	chr12:114846199-114846219
TBX5_P1	TBX5_P1:4	GTGCTCTTCTTGACAGACGT	GTGGAAAGGACGAAACACCGGTGCTCTTCTTGACAGACGTGTTTTAGAGCTAGGCCAACATGAGGATCAC	chr12:114846266-114846286
TBX5_P1	TBX5_P1:5	TCATTGAGCACAGATGGTCT	GTGGAAAGGACGAAACACCGTCATTGAGCACAGATGGTCTGTTTTAGAGCTAGGCCAACATGAGGATCAC	chr12:114846424-114846444
TBX5_P2	TBX5_P2:1	TCAGTACTTTGTGAGCATCG	GTGGAAAGGACGAAACACCGTCAGTACTTTGTGAGCATCGGTTTTAGAGCTAGGCCAACATGAGGATCAC	chr12:114846560-114846580
TBX5_P2	TBX5_P2:4	AGAGGATGTGGTGAATGCAC	GTGGAAAGGACGAAACACCGAGAGGATGTGGTGAATGCACGTTTTAGAGCTAGGCCAACATGAGGATCAC	chr12:114846869-114846889
TBX5_P2	TBX5_P2:5	ACCTACCGCTGGAGCCTCCG	GTGGAAAGGACGAAACACCGACCTACCGCTGGAGCCTCCGGTTTTAGAGCTAGGCCAACATGAGGATCAC	chr12:114847015-114847035
NGFRAP1	NGFRAP1:1	AGGAATTCAGGGGCTACGT	GTGGAAAGGACGAAACACCGAGGAATTCAGGGGCTACGTGTTTTAGAGCTAGGCCAACATGAGGATCAC	chrX:102631010-102631029
NGFRAP1	NGFRAP1:2	GCCAAGGCCTGAAGTGAGA	GTGGAAAGGACGAAACACCGGCCAAGGCCTGAAGTGAGAGTTTTAGAGCTAGGCCAACATGAGGATCAC	chrX:102631126-102631146
NGFRAP1	NGFRAP1:3	GTTGGAGTTTGCCCTCCTC	GTGGAAAGGACGAAACACCGGTTGGAGTTTGCCCTCCTCGTTTTAGAGCTAGGCCAACATGAGGATCAC	chrX:102631188-102631207
NGFRAP1	NGFRAP1:4	AGGACCGAGAAGAGTGACA	GTGGAAAGGACGAAACACCGAGGACCGAGAAGAGTGACAGTTTTAGAGCTAGGCCAACATGAGGATCAC	chrX:102631247-102631266
CHDEnh1	CHDEnh1:1	TTCAGAGTTGTTGACGCCA	GTGGAAAGGACGAAACACCGTTCAGAGTTGTTGACGCCAGTTTTAGAGCTAGGCCAACATGAGGATCAC	chr12:114371023-114371042
CHDEnh1	CHDEnh1:2	ATGAACAGCACTTCATGGG	GTGGAAAGGACGAAACACCGATGAACAGCACTTCATGGGGTTTTAGAGCTAGGCCAACATGAGGATCAC	chr12:114371080-114371099
CHDEnh1	CHDEnh1:3	AAACAAGAGGCCGGTAGCG	GTGGAAAGGACGAAACACCGAAACAAGAGGCCGGTAGCGGTTTTAGAGCTAGGCCAACATGAGGATCAC	chr12:114371179-114371198
CHDEnh1	CHDEnh1:4	AGCAGAGGGCATCCACCCC	GTGGAAAGGACGAAACACCGAGCAGAGGGCATCCACCCCGTTTTAGAGCTAGGCCAACATGAGGATCAC	chr12:114371257-114371276
CHDEnh1	CHDEnh1:5	ATTCTTTCAAATCAGCCAA	GTGGAAAGGACGAAACACCGATTCTTTCAAATCAGCCAAGTTTTAGAGCTAGGCCAACATGAGGATCAC	chr12:114371303-114371322
CHDEnh1	CHDEnh1:7	TTCTCGGGTGCTGACTGGC	GTGGAAAGGACGAAACACCGTTCTCGGGTGCTGACTGGCGTTTTAGAGCTAGGCCAACATGAGGATCAC	chr12:114371401-114371420
CHDEnh1	CHDEnh1:8	AACTCCCAGAGTAGAACTG	GTGGAAAGGACGAAACACCGAACTCCCAGAGTAGAACTGGTTTTAGAGCTAGGCCAACATGAGGATCAC	chr12:114371456-114371475
CHDEnh2	CHDEnh2:1	CAAAACTACCCTAGGGCCC	GTGGAAAGGACGAAACACCGCAAAACTACCCTAGGGCCCGTTTTAGAGCTAGGCCAACATGAGGATCAC	chr12:114463741-114463760
CHDEnh2	CHDEnh2:2	AATGCAGGAAAGTAGGCCC	GTGGAAAGGACGAAACACCGAATGCAGGAAAGTAGGCCCGTTTTAGAGCTAGGCCAACATGAGGATCAC	chr12:114463774-114463793
CHDEnh2	CHDEnh2:3	TGTGCCTGGTGCTTGAATG	GTGGAAAGGACGAAACACCGTGTGCCTGGTGCTTGAATGGTTTTAGAGCTAGGCCAACATGAGGATCAC	chr12:114463805-114463824
CHDEnh2	CHDEnh2:5	CCCTGGCACAATGGAAGCA	GTGGAAAGGACGAAACACCGCCCTGGCACAATGGAAGCAGTTTTAGAGCTAGGCCAACATGAGGATCAC	chr12:114463874-114463893
CHDEnh2	CHDEnh2:6	GGTCAAACCCCTCCCTTTG	GTGGAAAGGACGAAACACCGGGTCAAACCCCTCCCTTTGGTTTTAGAGCTAGGCCAACATGAGGATCAC	chr12:114463919-114463938
CHDEnh2	CHDEnh2:7	TGCTGCCCCGGAAGTGAGG	GTGGAAAGGACGAAACACCGTGCTGCCCCGGAAGTGAGGGTTTTAGAGCTAGGCCAACATGAGGATCAC	chr12:114463965-114463984
CHDEnh2	CHDEnh2:8	AGGTTGGGTGACTCCCCCA	GTGGAAAGGACGAAACACCGAGGTTGGGTGACTCCCCCAGTTTTAGAGCTAGGCCAACATGAGGATCAC	chr12:114464027-114464046
CHDEnh3	CHDEnh3:1	AAGGCACAGGTTCGTCCTG	GTGGAAAGGACGAAACACCGAAGGCACAGGTTCGTCCTGGTTTTAGAGCTAGGCCAACATGAGGATCAC	chr12:114701282-114701301
CHDEnh3	CHDEnh3:2	GTCCAACGCAACGGTCCCT	GTGGAAAGGACGAAACACCGGTCCAACGCAACGGTCCCTGTTTTAGAGCTAGGCCAACATGAGGATCAC	chr12:114701678-114701697
CHDEnh3	CHDEnh3:3	GTCGCTTCCGGCTGGTTTG	GTGGAAAGGACGAAACACCGGTCGCTTCCGGCTGGTTTGGTTTTAGAGCTAGGCCAACATGAGGATCAC	chr12:114701908-114701927
CHDEnh3	CHDEnh3:4	CTTGGCGGTGTTTCTGCGC	GTGGAAAGGACGAAACACCGCTTGGCGGTGTTTCTGCGCGTTTTAGAGCTAGGCCAACATGAGGATCAC	chr12:114702349-114702368
CHDEnh3	CHDEnh3:6	ATCCCTAGCGGCTGCAGAG	GTGGAAAGGACGAAACACCGATCCCTAGCGGCTGCAGAGGTTTTAGAGCTAGGCCAACATGAGGATCAC	chr12:114703714-114703733
CHDEnh3	CHDEnh3:7	CGGCCCCTCTTTACCGGAT	GTGGAAAGGACGAAACACCGCGGCCCCTCTTTACCGGATGTTTTAGAGCTAGGCCAACATGAGGATCAC	chr12:114704275-114704294
CHDEnh3	CHDEnh3:8	TGACGCTTTCGAAACCAAA	GTGGAAAGGACGAAACACCGTGACGCTTTCGAAACCAAAGTTTTAGAGCTAGGCCAACATGAGGATCAC	chr12:114704579-114704598
CHDEnh4	CHDEnh4:1	GGGCAGCCATTAGCTAGGA	GTGGAAAGGACGAAACACCGGGGCAGCCATTAGCTAGGAGTTTTAGAGCTAGGCCAACATGAGGATCAC	chr12:114773383-114773402
CHDEnh4	CHDEnh4:2	CTACTCACTAGAGGGTGGT	GTGGAAAGGACGAAACACCGCTACTCACTAGAGGGTGGTGTTTTAGAGCTAGGCCAACATGAGGATCAC	chr12:114773438-114773457
CHDEnh4	CHDEnh4:4	AGTACGGGCTTTGAATGCC	GTGGAAAGGACGAAACACCGAGTACGGGCTTTGAATGCCGTTTTAGAGCTAGGCCAACATGAGGATCAC	chr12:114773545-114773564
CHDEnh4	CHDEnh4:5	GAATGTGCGTGATGTATTT	GTGGAAAGGACGAAACACCGGAATGTGCGTGATGTATTTGTTTTAGAGCTAGGCCAACATGAGGATCAC	chr12:114773620-114773639
CHDEnh4	CHDEnh4:6	AGCTTTCCCAGACCTCCTC	GTGGAAAGGACGAAACACCGAGCTTTCCCAGACCTCCTCGTTTTAGAGCTAGGCCAACATGAGGATCAC	chr12:114773687-114773706
CHDEnh4	CHDEnh4:7	ACCCAGTGGTGAATCAGTG	GTGGAAAGGACGAAACACCGACCCAGTGGTGAATCAGTGGTTTTAGAGCTAGGCCAACATGAGGATCAC	chr12:114773771-114773790
CHDEnh4	CHDEnh4:8	CCAACCGAAGGTCAGATCG	GTGGAAAGGACGAAACACCGCCAACCGAAGGTCAGATCGGTTTTAGAGCTAGGCCAACATGAGGATCAC	chr12:114773822-114773841
CHDEnh5	CHDEnh5:1	GGTTCTTGAACCTCGAGCA	GTGGAAAGGACGAAACACCGGGTTCTTGAACCTCGAGCAGTTTTAGAGCTAGGCCAACATGAGGATCAC	chr12:114799377-114799396
CHDEnh5	CHDEnh5:2	ATGTAAGTGTTATCAGAAA	GTGGAAAGGACGAAACACCGATGTAAGTGTTATCAGAAAGTTTTAGAGCTAGGCCAACATGAGGATCAC	chr12:114799412-114799431
CHDEnh5	CHDEnh5:3	GAGGCAGAAAGTGGGTTTG	GTGGAAAGGACGAAACACCGGAGGCAGAAAGTGGGTTTGGTTTTAGAGCTAGGCCAACATGAGGATCAC	chr12:114799479-114799498
CHDEnh5	CHDEnh5:4	GCCTAGGGGCAGAAGGGAA	GTGGAAAGGACGAAACACCGGCCTAGGGGCAGAAGGGAAGTTTTAGAGCTAGGCCAACATGAGGATCAC	chr12:114799525-114799544
CHDEnh5	CHDEnh5:5	GAAAACACGGCCACTAAGC	GTGGAAAGGACGAAACACCGGAAAACACGGCCACTAAGCGTTTTAGAGCTAGGCCAACATGAGGATCAC	chr12:114799553-114799572
CHDEnh5	CHDEnh5:6	ACCACTTTTTAAGTTAAAG	GTGGAAAGGACGAAACACCGACCACTTTTTAAGTTAAAGGTTTTAGAGCTAGGCCAACATGAGGATCAC	chr12:114799650-114799669
CHDEnh5	CHDEnh5:8	CTATTTTTGCAGCTTCCTT	GTGGAAAGGACGAAACACCGCTATTTTTGCAGCTTCCTTGTTTTAGAGCTAGGCCAACATGAGGATCAC	chr12:114799836-114799855
GATA4_ENH1	GATA4_ENH1:1	CTCCAGCCAGCTGACGTCC	GTGGAAAGGACGAAACACCGCTCCAGCCAGCTGACGTCCGTTTTAGAGCTAGGCCAACATGAGGATCAC	chr8:11599990-11600009
GATA4_ENH1	GATA4_ENH1:3	GCCTCTGTTCAGCAGCTGC	GTGGAAAGGACGAAACACCGGCCTCTGTTCAGCAGCTGCGTTTTAGAGCTAGGCCAACATGAGGATCAC	chr8:11600092-11600111
GATA4_ENH1	GATA4_ENH1:4	CTCCAGCGGCGCTCCGGCC	GTGGAAAGGACGAAACACCGCTCCAGCGGCGCTCCGGCCGTTTTAGAGCTAGGCCAACATGAGGATCAC	chr8:11600142-11600161
GATA4_ENH1	GATA4_ENH1:5	GACGAAGCCCAGAAGACCC	GTGGAAAGGACGAAACACCGGACGAAGCCCAGAAGACCCGTTTTAGAGCTAGGCCAACATGAGGATCAC	chr8:11600212-11600231
GATA4_ENH1	GATA4_ENH1:6	GGCCTCGTGCCCCACACCC	GTGGAAAGGACGAAACACCGGGCCTCGTGCCCCACACCCGTTTTAGAGCTAGGCCAACATGAGGATCAC	chr8:11600271-11600290
GATA4_ENH1	GATA4_ENH1:8	TGAAGCCCCTTTGGTTCCC	GTGGAAAGGACGAAACACCGTGAAGCCCCTTTGGTTCCCGTTTTAGAGCTAGGCCAACATGAGGATCAC	chr8:11600416-11600435
GATA4_PROM1	GATA4_PROM1:1	ACTATTATCCCATGCCCAG	GTGGAAAGGACGAAACACCGACTATTATCCCATGCCCAGGTTTTAGAGCTAGGCCAACATGAGGATCAC	chr8:11534068-11534087
GATA4_PROM1	GATA4_PROM1:2	CTATTATCCCATGCCCAGA	GTGGAAAGGACGAAACACCGCTATTATCCCATGCCCAGAGTTTTAGAGCTAGGCCAACATGAGGATCAC	chr8:11534069-11534088
GATA4_PROM1	GATA4_PROM1:3	CCCATGAACGGCGATTCCT	GTGGAAAGGACGAAACACCGCCCATGAACGGCGATTCCTGTTTTAGAGCTAGGCCAACATGAGGATCAC	chr8:11534213-11534232
GATA4_PROM1	GATA4_PROM1:4	TGGTGTGTGTAAAAGTGGA	GTGGAAAGGACGAAACACCGTGGTGTGTGTAAAAGTGGAGTTTTAGAGCTAGGCCAACATGAGGATCAC	chr8:11534335-11534354
GATA4_PROM1	GATA4_PROM1:5	GGGACGCCGCTCCCCACCG	GTGGAAAGGACGAAACACCGGGGACGCCGCTCCCCACCGGTTTTAGAGCTAGGCCAACATGAGGATCAC	chr8:11534550-11534569
GATA4_PROM1	GATA4_PROM1:6	AGTCCCCTCCTGGCCCTCC	GTGGAAAGGACGAAACACCGAGTCCCCTCCTGGCCCTCCGTTTTAGAGCTAGGCCAACATGAGGATCAC	chr8:11534575-11534594
GATA4_PROM2	GATA4_PROM2:1	CCTCCAAGGAATCCGGGGC	GTGGAAAGGACGAAACACCGCCTCCAAGGAATCCGGGGCGTTTTAGAGCTAGGCCAACATGAGGATCAC	chr8:11561220-11561239
GATA4_PROM2	GATA4_PROM2:2	CGCCCGCCGCTGCGGGATG	GTGGAAAGGACGAAACACCGCGCCCGCCGCTGCGGGATGGTTTTAGAGCTAGGCCAACATGAGGATCAC	chr8:11561367-11561386
GATA4_PROM2	GATA4_PROM2:4	CTACACCTCCGCTGGGCGC	GTGGAAAGGACGAAACACCGCTACACCTCCGCTGGGCGCGTTTTAGAGCTAGGCCAACATGAGGATCAC	chr8:11561591-11561610
GATA4_PROM2	GATA4_PROM2:5	GCGGCGACGAAGCCTCTCG	GTGGAAAGGACGAAACACCGGCGGCGACGAAGCCTCTCGGTTTTAGAGCTAGGCCAACATGAGGATCAC	chr8:11561741-11561760
GATA4_PROM2	GATA4_PROM2:6	AGTTTGGGGGACCGCGGGA	GTGGAAAGGACGAAACACCGAGTTTGGGGGACCGCGGGAGTTTTAGAGCTAGGCCAACATGAGGATCAC	chr8:11561845-11561864
GATA4_PROM2	GATA4_PROM2:7	GAAAGCGTTCAAGTTCACA	GTGGAAAGGACGAAACACCGGAAAGCGTTCAAGTTCACAGTTTTAGAGCTAGGCCAACATGAGGATCAC	chr8:11562059-11562078
GATA4_PROM2	GATA4_PROM2:8	ACCCTTGTTTGCATATCGC	GTGGAAAGGACGAAACACCGACCCTTGTTTGCATATCGCGTTTTAGAGCTAGGCCAACATGAGGATCAC	chr8:11562107-11562126
GATA4_PROM3	GATA4_PROM3:2	GCACCAGACGCGGCCCCAC	GTGGAAAGGACGAAACACCGGCACCAGACGCGGCCCCACGTTTTAGAGCTAGGCCAACATGAGGATCAC	chr8:11566035-11566054
GATA4_PROM3	GATA4_PROM3:3	CTGTAGGCCGCAGCTTCCC	GTGGAAAGGACGAAACACCGCTGTAGGCCGCAGCTTCCCGTTTTAGAGCTAGGCCAACATGAGGATCAC	chr8:11566200-11566219
GATA4_PROM3	GATA4_PROM3:4	ATGTAAGCCGGGTAGGGGC	GTGGAAAGGACGAAACACCGATGTAAGCCGGGTAGGGGCGTTTTAGAGCTAGGCCAACATGAGGATCAC	chr8:11566299-11566318
GATA4_PROM3	GATA4_PROM3:5	ATTGGGGTGTCGGGCGGCC	GTGGAAAGGACGAAACACCGATTGGGGTGTCGGGCGGCCGTTTTAGAGCTAGGCCAACATGAGGATCAC	chr8:11566414-11566433
GATA4_PROM3	GATA4_PROM3:6	TCACTACCTCGAGTTTCTA	GTGGAAAGGACGAAACACCGTCACTACCTCGAGTTTCTAGTTTTAGAGCTAGGCCAACATGAGGATCAC	chr8:11566552-11566571
GATA4_PROM3	GATA4_PROM3:7	CTCTTCTGAGATGGTGTCA	GTGGAAAGGACGAAACACCGCTCTTCTGAGATGGTGTCAGTTTTAGAGCTAGGCCAACATGAGGATCAC	chr8:11566659-11566678
GATA4_PROM3	GATA4_PROM3:8	CCTGGGATTTCCTCGTGGA	GTGGAAAGGACGAAACACCGCCTGGGATTTCCTCGTGGAGTTTTAGAGCTAGGCCAACATGAGGATCAC	chr8:11566784-11566803
GLI2_ENH1	GLI2_ENH1:1	TTCCTTTTGGCACGCGCTA	GTGGAAAGGACGAAACACCGTTCCTTTTGGCACGCGCTAGTTTTAGAGCTAGGCCAACATGAGGATCAC	chr2:121523417-121523436
GLI2_ENH1	GLI2_ENH1:2	GCAGGAAAAGCACTCCTCC	GTGGAAAGGACGAAACACCGGCAGGAAAAGCACTCCTCCGTTTTAGAGCTAGGCCAACATGAGGATCAC	chr2:121523510-121523529
GLI2_ENH1	GLI2_ENH1:3	TCCGAGACCTTGCCCACAG	GTGGAAAGGACGAAACACCGTCCGAGACCTTGCCCACAGGTTTTAGAGCTAGGCCAACATGAGGATCAC	chr2:121523587-121523606
GLI2_ENH1	GLI2_ENH1:5	CATCACGATGGGGAGGGTT	GTGGAAAGGACGAAACACCGCATCACGATGGGGAGGGTTGTTTTAGAGCTAGGCCAACATGAGGATCAC	chr2:121523662-121523681
GLI2_ENH1	GLI2_ENH1:6	AAGGCTGCGAGGTCACAGA	GTGGAAAGGACGAAACACCGAAGGCTGCGAGGTCACAGAGTTTTAGAGCTAGGCCAACATGAGGATCAC	chr2:121523759-121523778
GLI2_ENH1	GLI2_ENH1:7	CAAACTGAGGCGCCACAGC	GTGGAAAGGACGAAACACCGCAAACTGAGGCGCCACAGCGTTTTAGAGCTAGGCCAACATGAGGATCAC	chr2:121523785-121523804
GLI2_ENH1	GLI2_ENH1:8	GACGCTCTTCACACTGTCT	GTGGAAAGGACGAAACACCGGACGCTCTTCACACTGTCTGTTTTAGAGCTAGGCCAACATGAGGATCAC	chr2:121523860-121523879
GLI2_PROM1	GLI2_PROM1:1	CACGCGGACCCTCTTCCCG	GTGGAAAGGACGAAACACCGCACGCGGACCCTCTTCCCGGTTTTAGAGCTAGGCCAACATGAGGATCAC	chr2:121492947-121492966
GLI2_PROM1	GLI2_PROM1:2	AGCCCTTGCCCCTCAGCTC	GTGGAAAGGACGAAACACCGAGCCCTTGCCCCTCAGCTCGTTTTAGAGCTAGGCCAACATGAGGATCAC	chr2:121493119-121493138
GLI2_PROM1	GLI2_PROM1:3	CGGAGATTGGCGCGTCCTT	GTGGAAAGGACGAAACACCGCGGAGATTGGCGCGTCCTTGTTTTAGAGCTAGGCCAACATGAGGATCAC	chr2:121493210-121493229
GLI2_PROM1	GLI2_PROM1:4	ACCCGAACGCCGCCGGGGC	GTGGAAAGGACGAAACACCGACCCGAACGCCGCCGGGGCGTTTTAGAGCTAGGCCAACATGAGGATCAC	chr2:121493321-121493340
GLI2_PROM1	GLI2_PROM1:5	TGCCTCGGCTGGCAAGCGC	GTGGAAAGGACGAAACACCGTGCCTCGGCTGGCAAGCGCGTTTTAGAGCTAGGCCAACATGAGGATCAC	chr2:121493466-121493485
GLI2_PROM1	GLI2_PROM1:8	TAGCACGCAGGTGGCCTCT	GTGGAAAGGACGAAACACCGTAGCACGCAGGTGGCCTCTGTTTTAGAGCTAGGCCAACATGAGGATCAC	chr2:121493819-121493838
IRX4_ENH1	IRX4_ENH1:2	CACGCTTCATCCCCAGCGC	GTGGAAAGGACGAAACACCGCACGCTTCATCCCCAGCGCGTTTTAGAGCTAGGCCAACATGAGGATCAC	chr5:1841229-1841248
IRX4_ENH1	IRX4_ENH1:4	GGTTATCTGGCTTGACCTT	GTGGAAAGGACGAAACACCGGGTTATCTGGCTTGACCTTGTTTTAGAGCTAGGCCAACATGAGGATCAC	chr5:1841331-1841350
IRX4_ENH1	IRX4_ENH1:5	CAGCCTTCCTGAGTGGTCA	GTGGAAAGGACGAAACACCGCAGCCTTCCTGAGTGGTCAGTTTTAGAGCTAGGCCAACATGAGGATCAC	chr5:1841417-1841436
IRX4_ENH1	IRX4_ENH1:6	GCGCAGGGATGGCGCTGAC	GTGGAAAGGACGAAACACCGGCGCAGGGATGGCGCTGACGTTTTAGAGCTAGGCCAACATGAGGATCAC	chr5:1841485-1841504
IRX4_ENH1	IRX4_ENH1:8	CAGCCGCTGCTCCAGGGCC	GTGGAAAGGACGAAACACCGCAGCCGCTGCTCCAGGGCCGTTTTAGAGCTAGGCCAACATGAGGATCAC	chr5:1841589-1841608
IRX4_PROM1	IRX4_PROM1:1	CCTGCAGGGTTCTGCGCGC	GTGGAAAGGACGAAACACCGCCTGCAGGGTTCTGCGCGCGTTTTAGAGCTAGGCCAACATGAGGATCAC	chr5:1882792-1882811
IRX4_PROM1	IRX4_PROM1:2	TTCCTTTAACTTCGCATTC	GTGGAAAGGACGAAACACCGTTCCTTTAACTTCGCATTCGTTTTAGAGCTAGGCCAACATGAGGATCAC	chr5:1882956-1882975
IRX4_PROM1	IRX4_PROM1:3	CGCGCACATCTGACTTGAC	GTGGAAAGGACGAAACACCGCGCGCACATCTGACTTGACGTTTTAGAGCTAGGCCAACATGAGGATCAC	chr5:1883075-1883094
IRX4_PROM1	IRX4_PROM1:4	CTCGCCGGTCACTCGCCGG	GTGGAAAGGACGAAACACCGCTCGCCGGTCACTCGCCGGGTTTTAGAGCTAGGCCAACATGAGGATCAC	chr5:1883155-1883174
IRX4_PROM1	IRX4_PROM1:5	TTAGTCACCCGAGAACGAG	GTGGAAAGGACGAAACACCGTTAGTCACCCGAGAACGAGGTTTTAGAGCTAGGCCAACATGAGGATCAC	chr5:1883296-1883315
IRX4_PROM1	IRX4_PROM1:6	CGGCCGCCTGCGCAGCGCC	GTGGAAAGGACGAAACACCGCGGCCGCCTGCGCAGCGCCGTTTTAGAGCTAGGCCAACATGAGGATCAC	chr5:1883446-1883465
IRX4_PROM2	IRX4_PROM2:1	CCTGTGCCCGCCCACCGCT	GTGGAAAGGACGAAACACCGCCTGTGCCCGCCCACCGCTGTTTTAGAGCTAGGCCAACATGAGGATCAC	chr5:1886496-1886515
IRX4_PROM2	IRX4_PROM2:2	TCCTACCACTGGCTCCGAG	GTGGAAAGGACGAAACACCGTCCTACCACTGGCTCCGAGGTTTTAGAGCTAGGCCAACATGAGGATCAC	chr5:1886620-1886639
IRX4_PROM2	IRX4_PROM2:4	TGCGTTTGCTGCAAGTTGC	GTGGAAAGGACGAAACACCGTGCGTTTGCTGCAAGTTGCGTTTTAGAGCTAGGCCAACATGAGGATCAC	chr5:1886859-1886878
IRX4_PROM2	IRX4_PROM2:5	AGCTCCCGCCCGCGCCGTG	GTGGAAAGGACGAAACACCGAGCTCCCGCCCGCGCCGTGGTTTTAGAGCTAGGCCAACATGAGGATCAC	chr5:1886987-1887006
IRX4_PROM2	IRX4_PROM2:6	GAGGGGTCTCGGAACCCCG	GTGGAAAGGACGAAACACCGGAGGGGTCTCGGAACCCCGGTTTTAGAGCTAGGCCAACATGAGGATCAC	chr5:1887124-1887143
IRX4_PROM2	IRX4_PROM2:8	CGTTAATGGGCGGCCGGGT	GTGGAAAGGACGAAACACCGCGTTAATGGGCGGCCGGGTGTTTTAGAGCTAGGCCAACATGAGGATCAC	chr5:1887383-1887402
ISL1_PROM1	ISL1_PROM1:1	CAATCAGGTTGGAACGCAC	GTGGAAAGGACGAAACACCGCAATCAGGTTGGAACGCACGTTTTAGAGCTAGGCCAACATGAGGATCAC	chr5:50678472-50678491
ISL1_PROM1	ISL1_PROM1:2	ATGGGATGATTAAACCCAG	GTGGAAAGGACGAAACACCGATGGGATGATTAAACCCAGGTTTTAGAGCTAGGCCAACATGAGGATCAC	chr5:50678592-50678611
ISL1_PROM1	ISL1_PROM1:4	GTGAGCCCCGCGCGCAACG	GTGGAAAGGACGAAACACCGGTGAGCCCCGCGCGCAACGGTTTTAGAGCTAGGCCAACATGAGGATCAC	chr5:50678833-50678852
ISL1_PROM1	ISL1_PROM1:5	GCCCGGCAGCCCGAGCTTC	GTGGAAAGGACGAAACACCGGCCCGGCAGCCCGAGCTTCGTTTTAGAGCTAGGCCAACATGAGGATCAC	chr5:50679000-50679019
ISL1_PROM1	ISL1_PROM1:6	CTGAGCGCCACTGACCGCT	GTGGAAAGGACGAAACACCGCTGAGCGCCACTGACCGCTGTTTTAGAGCTAGGCCAACATGAGGATCAC	chr5:50679087-50679106
ISL1_PROM1	ISL1_PROM1:7	AACTCAGCTCCATCGCCAT	GTGGAAAGGACGAAACACCGAACTCAGCTCCATCGCCATGTTTTAGAGCTAGGCCAACATGAGGATCAC	chr5:50679209-50679228
MEIS1_ENH1	MEIS1_ENH1:1	TGTCAACGGGCTGCACCTA	GTGGAAAGGACGAAACACCGTGTCAACGGGCTGCACCTAGTTTTAGAGCTAGGCCAACATGAGGATCAC	chr2:66666440-66666459
MEIS1_ENH1	MEIS1_ENH1:2	CACCGAGATCCCCCGAGCC	GTGGAAAGGACGAAACACCGCACCGAGATCCCCCGAGCCGTTTTAGAGCTAGGCCAACATGAGGATCAC	chr2:66666510-66666529
MEIS1_ENH1	MEIS1_ENH1:3	GTTCCTGCGGGTTCCTCCT	GTGGAAAGGACGAAACACCGGTTCCTGCGGGTTCCTCCTGTTTTAGAGCTAGGCCAACATGAGGATCAC	chr2:66666549-66666568
MEIS1_ENH1	MEIS1_ENH1:5	CGTATCTGGCCGGAGAAAT	GTGGAAAGGACGAAACACCGCGTATCTGGCCGGAGAAATGTTTTAGAGCTAGGCCAACATGAGGATCAC	chr2:66666715-66666734
MEIS1_ENH1	MEIS1_ENH1:6	AGGATCGGTTTAGCGTATC	GTGGAAAGGACGAAACACCGAGGATCGGTTTAGCGTATCGTTTTAGAGCTAGGCCAACATGAGGATCAC	chr2:66666728-66666747
MEIS1_ENH1	MEIS1_ENH1:7	GTGAGCGGTCACCTGGGTC	GTGGAAAGGACGAAACACCGGTGAGCGGTCACCTGGGTCGTTTTAGAGCTAGGCCAACATGAGGATCAC	chr2:66666803-66666822
MEIS1_ENH1	MEIS1_ENH1:8	TAGATGACACAATCGGAGA	GTGGAAAGGACGAAACACCGTAGATGACACAATCGGAGAGTTTTAGAGCTAGGCCAACATGAGGATCAC	chr2:66666850-66666869
MEIS1_ENH2	MEIS1_ENH2:1	CATCCTGATCCCCTGCAGC	GTGGAAAGGACGAAACACCGCATCCTGATCCCCTGCAGCGTTTTAGAGCTAGGCCAACATGAGGATCAC	chr2:66708234-66708253
MEIS1_ENH2	MEIS1_ENH2:2	ACCCAGGACATGTAAGCTC	GTGGAAAGGACGAAACACCGACCCAGGACATGTAAGCTCGTTTTAGAGCTAGGCCAACATGAGGATCAC	chr2:66708261-66708280
MEIS1_ENH2	MEIS1_ENH2:3	TCTTCCTACTACTCACTGA	GTGGAAAGGACGAAACACCGTCTTCCTACTACTCACTGAGTTTTAGAGCTAGGCCAACATGAGGATCAC	chr2:66708333-66708352
MEIS1_ENH2	MEIS1_ENH2:4	GGCTCTCTATTCTGGTGCT	GTGGAAAGGACGAAACACCGGGCTCTCTATTCTGGTGCTGTTTTAGAGCTAGGCCAACATGAGGATCAC	chr2:66708385-66708404
MEIS1_ENH2	MEIS1_ENH2:5	GCTGGCTACATAGCAATGG	GTGGAAAGGACGAAACACCGGCTGGCTACATAGCAATGGGTTTTAGAGCTAGGCCAACATGAGGATCAC	chr2:66708443-66708462
MEIS1_ENH2	MEIS1_ENH2:8	AATGACGCTGCCATTCTTT	GTGGAAAGGACGAAACACCGAATGACGCTGCCATTCTTTGTTTTAGAGCTAGGCCAACATGAGGATCAC	chr2:66708634-66708653
MEIS1_PROM	MEIS1_PROM:1	GGGATCGTGGAGGAAAAGG	GTGGAAAGGACGAAACACCGGGGATCGTGGAGGAAAAGGGTTTTAGAGCTAGGCCAACATGAGGATCAC	chr2:66661771-66661790
MEIS1_PROM	MEIS1_PROM:3	AAAATAAAGCTGGCGGCCG	GTGGAAAGGACGAAACACCGAAAATAAAGCTGGCGGCCGGTTTTAGAGCTAGGCCAACATGAGGATCAC	chr2:66662029-66662048
MEIS1_PROM	MEIS1_PROM:4	AGCTCTGGCCGCACTGGAG	GTGGAAAGGACGAAACACCGAGCTCTGGCCGCACTGGAGGTTTTAGAGCTAGGCCAACATGAGGATCAC	chr2:66662136-66662155
MEIS1_PROM	MEIS1_PROM:5	GTGTGTTGCACAGGCGGAG	GTGGAAAGGACGAAACACCGGTGTGTTGCACAGGCGGAGGTTTTAGAGCTAGGCCAACATGAGGATCAC	chr2:66662276-66662295
MEIS1_PROM	MEIS1_PROM:7	CATCCGCTCTGTCTTCTTC	GTGGAAAGGACGAAACACCGCATCCGCTCTGTCTTCTTCGTTTTAGAGCTAGGCCAACATGAGGATCAC	chr2:66662550-66662569
MEIS1_PROM	MEIS1_PROM:8	ATTTGGTAGTTGGGTCTGA	GTGGAAAGGACGAAACACCGATTTGGTAGTTGGGTCTGAGTTTTAGAGCTAGGCCAACATGAGGATCAC	chr2:66662635-66662654
MSX2_ENH1	MSX2_ENH1:1	TTTCAAAATTATCGATAAA	GTGGAAAGGACGAAACACCGTTTCAAAATTATCGATAAAGTTTTAGAGCTAGGCCAACATGAGGATCAC	chr5:174119979-174119998
MSX2_ENH1	MSX2_ENH1:2	TGCCTCGTGGAGAATCCAA	GTGGAAAGGACGAAACACCGTGCCTCGTGGAGAATCCAAGTTTTAGAGCTAGGCCAACATGAGGATCAC	chr5:174120035-174120054
MSX2_ENH1	MSX2_ENH1:3	GGGCTAATAAAGCGTTGAA	GTGGAAAGGACGAAACACCGGGGCTAATAAAGCGTTGAAGTTTTAGAGCTAGGCCAACATGAGGATCAC	chr5:174120114-174120133
MSX2_ENH1	MSX2_ENH1:4	GATTGAGGAAAGCTATTCA	GTGGAAAGGACGAAACACCGGATTGAGGAAAGCTATTCAGTTTTAGAGCTAGGCCAACATGAGGATCAC	chr5:174120182-174120201
MSX2_ENH1	MSX2_ENH1:6	TTGACCTTCATTGGACAGT	GTGGAAAGGACGAAACACCGTTGACCTTCATTGGACAGTGTTTTAGAGCTAGGCCAACATGAGGATCAC	chr5:174120307-174120326
MSX2_ENH1	MSX2_ENH1:7	AAGAAAGAGCGTCAATCAC	GTGGAAAGGACGAAACACCGAAGAAAGAGCGTCAATCACGTTTTAGAGCTAGGCCAACATGAGGATCAC	chr5:174120383-174120402
MSX2_ENH1	MSX2_ENH1:8	TGACTTAAAGGGGGGTGTC	GTGGAAAGGACGAAACACCGTGACTTAAAGGGGGGTGTCGTTTTAGAGCTAGGCCAACATGAGGATCAC	chr5:174120409-174120428
MSX2_PROM1	MSX2_PROM1:1	AGTCGGTGCTGAAACTCAC	GTGGAAAGGACGAAACACCGAGTCGGTGCTGAAACTCACGTTTTAGAGCTAGGCCAACATGAGGATCAC	chr5:174151091-174151110
MSX2_PROM1	MSX2_PROM1:2	TTTTGACCCTTCTTTAAAA	GTGGAAAGGACGAAACACCGTTTTGACCCTTCTTTAAAAGTTTTAGAGCTAGGCCAACATGAGGATCAC	chr5:174151237-174151256
MSX2_PROM1	MSX2_PROM1:3	GGCGTGATTATAACCCTTC	GTGGAAAGGACGAAACACCGGGCGTGATTATAACCCTTCGTTTTAGAGCTAGGCCAACATGAGGATCAC	chr5:174151331-174151350
MSX2_PROM1	MSX2_PROM1:4	CCTTCGGGAAGAGCCAATC	GTGGAAAGGACGAAACACCGCCTTCGGGAAGAGCCAATCGTTTTAGAGCTAGGCCAACATGAGGATCAC	chr5:174151454-174151473
MSX2_PROM1	MSX2_PROM1:5	TTTTGCTGCGGAGACGGGA	GTGGAAAGGACGAAACACCGTTTTGCTGCGGAGACGGGAGTTTTAGAGCTAGGCCAACATGAGGATCAC	chr5:174151574-174151593
MSX2_PROM1	MSX2_PROM1:6	GTGGTGGCCGGACCAGGCC	GTGGAAAGGACGAAACACCGGTGGTGGCCGGACCAGGCCGTTTTAGAGCTAGGCCAACATGAGGATCAC	chr5:174151719-174151738
MSX2_PROM1	MSX2_PROM1:8	GAATTTTCCGACTTGACCG	GTGGAAAGGACGAAACACCGGAATTTTCCGACTTGACCGGTTTTAGAGCTAGGCCAACATGAGGATCAC	chr5:174151969-174151988
NKX2-6_ENH1	NKX2-6_ENH1:1	GCTGGGCGGCGGGTTTCAG	GTGGAAAGGACGAAACACCGGCTGGGCGGCGGGTTTCAGGTTTTAGAGCTAGGCCAACATGAGGATCAC	chr8:23584032-23584051
NKX2-6_ENH1	NKX2-6_ENH1:2	TTTCTAGAAACCGGCCGGG	GTGGAAAGGACGAAACACCGTTTCTAGAAACCGGCCGGGGTTTTAGAGCTAGGCCAACATGAGGATCAC	chr8:23584112-23584131
NKX2-6_ENH1	NKX2-6_ENH1:3	GCAGATCTAAGGCCAGACC	GTGGAAAGGACGAAACACCGGCAGATCTAAGGCCAGACCGTTTTAGAGCTAGGCCAACATGAGGATCAC	chr8:23584161-23584180
NKX2-6_ENH1	NKX2-6_ENH1:5	AGCGCCTAGGAGGTGGCCG	GTGGAAAGGACGAAACACCGAGCGCCTAGGAGGTGGCCGGTTTTAGAGCTAGGCCAACATGAGGATCAC	chr8:23584294-23584313
NKX2-6_ENH1	NKX2-6_ENH1:6	AGCGGGACCACGGGCAGAG	GTGGAAAGGACGAAACACCGAGCGGGACCACGGGCAGAGGTTTTAGAGCTAGGCCAACATGAGGATCAC	chr8:23584341-23584360
NKX2-6_ENH1	NKX2-6_ENH1:7	AGACTGACGGCGGAGGCGG	GTGGAAAGGACGAAACACCGAGACTGACGGCGGAGGCGGGTTTTAGAGCTAGGCCAACATGAGGATCAC	chr8:23584414-23584433
NKX2-6_ENH1	NKX2-6_ENH1:8	GGTTGTTTTCGTTTGGCCC	GTGGAAAGGACGAAACACCGGGTTGTTTTCGTTTGGCCCGTTTTAGAGCTAGGCCAACATGAGGATCAC	chr8:23584470-23584489
NKX2-6_PROM1	NKX2-6_PROM1:1	AGTAAGGCCCTGAATCTCA	GTGGAAAGGACGAAACACCGAGTAAGGCCCTGAATCTCAGTTTTAGAGCTAGGCCAACATGAGGATCAC	chr8:23563615-23563634
NKX2-6_PROM1	NKX2-6_PROM1:2	AATACGCCTCCTATCTCCT	GTGGAAAGGACGAAACACCGAATACGCCTCCTATCTCCTGTTTTAGAGCTAGGCCAACATGAGGATCAC	chr8:23563742-23563761
NKX2-6_PROM1	NKX2-6_PROM1:3	ATGGTTCGGAGCCTCCTGG	GTGGAAAGGACGAAACACCGATGGTTCGGAGCCTCCTGGGTTTTAGAGCTAGGCCAACATGAGGATCAC	chr8:23563890-23563909
NKX2-6_PROM1	NKX2-6_PROM1:4	CCGGGCTCTTCCGCACCCG	GTGGAAAGGACGAAACACCGCCGGGCTCTTCCGCACCCGGTTTTAGAGCTAGGCCAACATGAGGATCAC	chr8:23563996-23564015
NKX2-6_PROM1	NKX2-6_PROM1:5	GCCCCGCCCCATCCGCCTT	GTGGAAAGGACGAAACACCGGCCCCGCCCCATCCGCCTTGTTTTAGAGCTAGGCCAACATGAGGATCAC	chr8:23564115-23564134
NKX2-6_PROM1	NKX2-6_PROM1:7	GAGAGGATTCGACGGGCGC	GTGGAAAGGACGAAACACCGGAGAGGATTCGACGGGCGCGTTTTAGAGCTAGGCCAACATGAGGATCAC	chr8:23564365-23564384
NKX3-1_PROM1	NKX3-1_PROM1:1	TCCTGCGCCGCCCTGACGC	GTGGAAAGGACGAAACACCGTCCTGCGCCGCCCTGACGCGTTTTAGAGCTAGGCCAACATGAGGATCAC	chr8:23539949-23539968
NKX3-1_PROM1	NKX3-1_PROM1:2	GGCGGACCCCCAGAGCTCG	GTGGAAAGGACGAAACACCGGGCGGACCCCCAGAGCTCGGTTTTAGAGCTAGGCCAACATGAGGATCAC	chr8:23540062-23540081
NKX3-1_PROM1	NKX3-1_PROM1:3	GGGAGGACGCAGCCGCGCC	GTGGAAAGGACGAAACACCGGGGAGGACGCAGCCGCGCCGTTTTAGAGCTAGGCCAACATGAGGATCAC	chr8:23540195-23540214
NKX3-1_PROM1	NKX3-1_PROM1:4	AGGAAGGACGTGAGCGGCT	GTGGAAAGGACGAAACACCGAGGAAGGACGTGAGCGGCTGTTTTAGAGCTAGGCCAACATGAGGATCAC	chr8:23540313-23540332
NKX3-1_PROM1	NKX3-1_PROM1:5	AGTGAAAGCGGTGCGGGCC	GTGGAAAGGACGAAACACCGAGTGAAAGCGGTGCGGGCCGTTTTAGAGCTAGGCCAACATGAGGATCAC	chr8:23540438-23540457
NKX3-1_PROM1	NKX3-1_PROM1:7	GAAAACGGCTCAGGGCGGA	GTGGAAAGGACGAAACACCGGAAAACGGCTCAGGGCGGAGTTTTAGAGCTAGGCCAACATGAGGATCAC	chr8:23540693-23540712
NKX3-1_PROM1	NKX3-1_PROM1:8	GACCGTCAGAGCCAATTAC	GTGGAAAGGACGAAACACCGGACCGTCAGAGCCAATTACGTTTTAGAGCTAGGCCAACATGAGGATCAC	chr8:23540824-23540843
NR2F1_PROM1	NR2F1_PROM1:1	AGCTACCTACAGACTGGGA	GTGGAAAGGACGAAACACCGAGCTACCTACAGACTGGGAGTTTTAGAGCTAGGCCAACATGAGGATCAC	chr5:92918631-92918650
NR2F1_PROM1	NR2F1_PROM1:2	GGAGGGGCTCTCCAACCAA	GTGGAAAGGACGAAACACCGGGAGGGGCTCTCCAACCAAGTTTTAGAGCTAGGCCAACATGAGGATCAC	chr5:92918687-92918706
NR2F1_PROM1	NR2F1_PROM1:3	TTGACACGAGCTCCATATA	GTGGAAAGGACGAAACACCGTTGACACGAGCTCCATATAGTTTTAGAGCTAGGCCAACATGAGGATCAC	chr5:92918822-92918841
NR2F1_PROM1	NR2F1_PROM1:4	GAGCAATGTTTCCGAAAGG	GTGGAAAGGACGAAACACCGGAGCAATGTTTCCGAAAGGGTTTTAGAGCTAGGCCAACATGAGGATCAC	chr5:92918921-92918940
NR2F1_PROM1	NR2F1_PROM1:5	AACGATAAGAAGAATACGA	GTGGAAAGGACGAAACACCGAACGATAAGAAGAATACGAGTTTTAGAGCTAGGCCAACATGAGGATCAC	chr5:92919270-92919289
NR2F1_PROM1	NR2F1_PROM1:6	ACATTTTTGGGCGATCTCC	GTGGAAAGGACGAAACACCGACATTTTTGGGCGATCTCCGTTTTAGAGCTAGGCCAACATGAGGATCAC	chr5:92919371-92919390
RBM20_ENH1	RBM20_ENH1:1	AAAGGTTCAGGCTTTCAGT	GTGGAAAGGACGAAACACCGAAAGGTTCAGGCTTTCAGTGTTTTAGAGCTAGGCCAACATGAGGATCAC	chr10:112389347-112389366
RBM20_ENH1	RBM20_ENH1:2	TAGGCATTATGCACATTTT	GTGGAAAGGACGAAACACCGTAGGCATTATGCACATTTTGTTTTAGAGCTAGGCCAACATGAGGATCAC	chr10:112389455-112389474
RBM20_ENH1	RBM20_ENH1:3	ACTCTACATAATACAAGAT	GTGGAAAGGACGAAACACCGACTCTACATAATACAAGATGTTTTAGAGCTAGGCCAACATGAGGATCAC	chr10:112389473-112389492
RBM20_ENH1	RBM20_ENH1:4	TGTTTCATTCATGCTGCAT	GTGGAAAGGACGAAACACCGTGTTTCATTCATGCTGCATGTTTTAGAGCTAGGCCAACATGAGGATCAC	chr10:112389575-112389594
RBM20_ENH1	RBM20_ENH1:5	AAGTTGACACTGTGCCAAC	GTGGAAAGGACGAAACACCGAAGTTGACACTGTGCCAACGTTTTAGAGCTAGGCCAACATGAGGATCAC	chr10:112389598-112389617
RBM20_ENH1	RBM20_ENH1:6	CATGCTAAATGTAAACAGT	GTGGAAAGGACGAAACACCGCATGCTAAATGTAAACAGTGTTTTAGAGCTAGGCCAACATGAGGATCAC	chr10:112389671-112389690
RBM20_ENH1	RBM20_ENH1:7	GAGTGGGTAGAACACACAG	GTGGAAAGGACGAAACACCGGAGTGGGTAGAACACACAGGTTTTAGAGCTAGGCCAACATGAGGATCAC	chr10:112389731-112389750
RBM20_PROM1	RBM20_PROM1:1	GGGCGGACCGAGCGCGCCC	GTGGAAAGGACGAAACACCGGGGCGGACCGAGCGCGCCCGTTTTAGAGCTAGGCCAACATGAGGATCAC	chr10:112403668-112403687
RBM20_PROM1	RBM20_PROM1:2	GACACACGCAGCCCGCGGT	GTGGAAAGGACGAAACACCGGACACACGCAGCCCGCGGTGTTTTAGAGCTAGGCCAACATGAGGATCAC	chr10:112403780-112403799
RBM20_PROM1	RBM20_PROM1:4	TGTCCTTCCCGGTGGCGCG	GTGGAAAGGACGAAACACCGTGTCCTTCCCGGTGGCGCGGTTTTAGAGCTAGGCCAACATGAGGATCAC	chr10:112404092-112404111
RBM20_PROM1	RBM20_PROM1:5	TCGCGGCGAGAGAGCTCAA	GTGGAAAGGACGAAACACCGTCGCGGCGAGAGAGCTCAAGTTTTAGAGCTAGGCCAACATGAGGATCAC	chr10:112404171-112404190
RBM20_PROM1	RBM20_PROM1:6	CCTGGTGCCCGGGCGTCCC	GTGGAAAGGACGAAACACCGCCTGGTGCCCGGGCGTCCCGTTTTAGAGCTAGGCCAACATGAGGATCAC	chr10:112404290-112404309
RBM20_PROM1	RBM20_PROM1:7	AGGGACCACGGGTGCGCCT	GTGGAAAGGACGAAACACCGAGGGACCACGGGTGCGCCTGTTTTAGAGCTAGGCCAACATGAGGATCAC	chr10:112404423-112404442
RBM20_PROM1	RBM20_PROM1:8	GACACCGACTCTGCCCAGA	GTGGAAAGGACGAAACACCGGACACCGACTCTGCCCAGAGTTTTAGAGCTAGGCCAACATGAGGATCAC	chr10:112404537-112404556
RXRA_ENH1	RXRA_ENH1:1	GAATGTCCCAGAGGCTCAG	GTGGAAAGGACGAAACACCGGAATGTCCCAGAGGCTCAGGTTTTAGAGCTAGGCCAACATGAGGATCAC	chr9:137198487-137198506
RXRA_ENH1	RXRA_ENH1:2	GGCTCCCAGAATGTCCCAG	GTGGAAAGGACGAAACACCGGGCTCCCAGAATGTCCCAGGTTTTAGAGCTAGGCCAACATGAGGATCAC	chr9:137198495-137198514
RXRA_ENH1	RXRA_ENH1:3	TGCTGGATAGGCCACGTGC	GTGGAAAGGACGAAACACCGTGCTGGATAGGCCACGTGCGTTTTAGAGCTAGGCCAACATGAGGATCAC	chr9:137198552-137198571
RXRA_ENH1	RXRA_ENH1:4	AGGGTTGTCTGCACGAGTC	GTGGAAAGGACGAAACACCGAGGGTTGTCTGCACGAGTCGTTTTAGAGCTAGGCCAACATGAGGATCAC	chr9:137198632-137198651
RXRA_ENH1	RXRA_ENH1:5	GTAAACGAGGCTCACTGGG	GTGGAAAGGACGAAACACCGGTAAACGAGGCTCACTGGGGTTTTAGAGCTAGGCCAACATGAGGATCAC	chr9:137198690-137198709
RXRA_ENH1	RXRA_ENH1:6	TTTCACAATTGCGTAGGTC	GTGGAAAGGACGAAACACCGTTTCACAATTGCGTAGGTCGTTTTAGAGCTAGGCCAACATGAGGATCAC	chr9:137198753-137198772
RXRA_ENH1	RXRA_ENH1:8	ACGGCACTTGTCCAGGAGG	GTGGAAAGGACGAAACACCGACGGCACTTGTCCAGGAGGGTTTTAGAGCTAGGCCAACATGAGGATCAC	chr9:137198871-137198890
RXRA_PROM1	RXRA_PROM1:1	GGCCGCGCAGACAATGGCC	GTGGAAAGGACGAAACACCGGGCCGCGCAGACAATGGCCGTTTTAGAGCTAGGCCAACATGAGGATCAC	chr9:137217819-137217838
RXRA_PROM1	RXRA_PROM1:2	GCGAGGAGGCGGCGTGGGA	GTGGAAAGGACGAAACACCGGCGAGGAGGCGGCGTGGGAGTTTTAGAGCTAGGCCAACATGAGGATCAC	chr9:137217982-137218001
RXRA_PROM1	RXRA_PROM1:4	CGCCGGCGGGGGGGTGGCG	GTGGAAAGGACGAAACACCGCGCCGGCGGGGGGGTGGCGGTTTTAGAGCTAGGCCAACATGAGGATCAC	chr9:137218193-137218212
RXRA_PROM1	RXRA_PROM1:5	GCAACAACTCGCCGCGCCG	GTGGAAAGGACGAAACACCGGCAACAACTCGCCGCGCCGGTTTTAGAGCTAGGCCAACATGAGGATCAC	chr9:137218324-137218343
RXRA_PROM1	RXRA_PROM1:6	CTAACTCATGCCCGGCCGG	GTGGAAAGGACGAAACACCGCTAACTCATGCCCGGCCGGGTTTTAGAGCTAGGCCAACATGAGGATCAC	chr9:137218450-137218469
RXRA_PROM1	RXRA_PROM1:7	CGCGCCGCCAACGCGCCCC	GTGGAAAGGACGAAACACCGCGCGCCGCCAACGCGCCCCGTTTTAGAGCTAGGCCAACATGAGGATCAC	chr9:137218572-137218591
RXRA_PROM1	RXRA_PROM1:8	GGCGGGTGGCAGGTTCGCC	GTGGAAAGGACGAAACACCGGGCGGGTGGCAGGTTCGCCGTTTTAGAGCTAGGCCAACATGAGGATCAC	chr9:137218738-137218757
SMAD4_PROM1	SMAD4_PROM1:1	GGTTGTAGGAGTTCACTTC	GTGGAAAGGACGAAACACCGGGTTGTAGGAGTTCACTTCGTTTTAGAGCTAGGCCAACATGAGGATCAC	chr18:48556139-48556158
SMAD4_PROM1	SMAD4_PROM1:2	GGAGAGCTCGGCGTAGAGT	GTGGAAAGGACGAAACACCGGGAGAGCTCGGCGTAGAGTGTTTTAGAGCTAGGCCAACATGAGGATCAC	chr18:48556296-48556315
SMAD4_PROM1	SMAD4_PROM1:3	AACGAGATGCCAATTTCCC	GTGGAAAGGACGAAACACCGAACGAGATGCCAATTTCCCGTTTTAGAGCTAGGCCAACATGAGGATCAC	chr18:48556339-48556358
SMAD4_PROM1	SMAD4_PROM1:4	CGTCACTCGGAGCGGGAGG	GTGGAAAGGACGAAACACCGCGTCACTCGGAGCGGGAGGGTTTTAGAGCTAGGCCAACATGAGGATCAC	chr18:48556482-48556501
SMAD4_PROM1	SMAD4_PROM1:5	CAGTGGCTTCTCGACAAGT	GTGGAAAGGACGAAACACCGCAGTGGCTTCTCGACAAGTGTTTTAGAGCTAGGCCAACATGAGGATCAC	chr18:48556587-48556606
SMAD4_PROM1	SMAD4_PROM1:6	GCCAGGCGCCCAGCGAGAG	GTGGAAAGGACGAAACACCGGCCAGGCGCCCAGCGAGAGGTTTTAGAGCTAGGCCAACATGAGGATCAC	chr18:48556765-48556784
SMAD4_PROM1	SMAD4_PROM1:7	GCGCTGAGGAGGGGCGGCC	GTGGAAAGGACGAAACACCGGCGCTGAGGAGGGGCGGCCGTTTTAGAGCTAGGCCAACATGAGGATCAC	chr18:48556848-48556867
SMAD6_ENH1	SMAD6_ENH1:1	CTCGGGTCCCCACCGATGC	GTGGAAAGGACGAAACACCGCTCGGGTCCCCACCGATGCGTTTTAGAGCTAGGCCAACATGAGGATCAC	chr15:66914239-66914258
SMAD6_ENH1	SMAD6_ENH1:4	ACCGGGTGACCGAGAGGTC	GTGGAAAGGACGAAACACCGACCGGGTGACCGAGAGGTCGTTTTAGAGCTAGGCCAACATGAGGATCAC	chr15:66914369-66914388
SMAD6_ENH1	SMAD6_ENH1:6	AGGGAAGCCCACGGCCGGG	GTGGAAAGGACGAAACACCGAGGGAAGCCCACGGCCGGGGTTTTAGAGCTAGGCCAACATGAGGATCAC	chr15:66914524-66914543
SMAD6_ENH1	SMAD6_ENH1:7	AGGGCGCCTCTATCTCCCG	GTGGAAAGGACGAAACACCGAGGGCGCCTCTATCTCCCGGTTTTAGAGCTAGGCCAACATGAGGATCAC	chr15:66914577-66914596
SMAD6_ENH1	SMAD6_ENH1:8	ATAACGCCCAGGGCTCGGG	GTGGAAAGGACGAAACACCGATAACGCCCAGGGCTCGGGGTTTTAGAGCTAGGCCAACATGAGGATCAC	chr15:66914624-66914643
SMAD6_ENH2	SMAD6_ENH2:1	CAGCAGGCATGCAAGCAGT	GTGGAAAGGACGAAACACCGCAGCAGGCATGCAAGCAGTGTTTTAGAGCTAGGCCAACATGAGGATCAC	chr15:66913562-66913581
SMAD6_ENH2	SMAD6_ENH2:2	CTTCCTGGAAAATCCTTTC	GTGGAAAGGACGAAACACCGCTTCCTGGAAAATCCTTTCGTTTTAGAGCTAGGCCAACATGAGGATCAC	chr15:66913653-66913672
SMAD6_ENH2	SMAD6_ENH2:5	CACCTGCACGGGGATGAGG	GTGGAAAGGACGAAACACCGCACCTGCACGGGGATGAGGGTTTTAGAGCTAGGCCAACATGAGGATCAC	chr15:66913830-66913849
SMAD6_ENH2	SMAD6_ENH2:6	TCGCATTCAAAGCCTGTCC	GTGGAAAGGACGAAACACCGTCGCATTCAAAGCCTGTCCGTTTTAGAGCTAGGCCAACATGAGGATCAC	chr15:66913868-66913887
SMAD6_ENH2	SMAD6_ENH2:8	TCCTCGGAGAAACAGCTCT	GTGGAAAGGACGAAACACCGTCCTCGGAGAAACAGCTCTGTTTTAGAGCTAGGCCAACATGAGGATCAC	chr15:66913994-66914013
SMAD6_PROM1	SMAD6_PROM1:2	GCGAGCACACACGCGCGCG	GTGGAAAGGACGAAACACCGGCGAGCACACACGCGCGCGGTTTTAGAGCTAGGCCAACATGAGGATCAC	chr15:66994315-66994334
SMAD6_PROM1	SMAD6_PROM1:3	CAGGGCCGGAGGCTCCAAG	GTGGAAAGGACGAAACACCGCAGGGCCGGAGGCTCCAAGGTTTTAGAGCTAGGCCAACATGAGGATCAC	chr15:66994460-66994479
SMAD6_PROM1	SMAD6_PROM1:4	GCCGCCAAAGTGTCTAGAC	GTGGAAAGGACGAAACACCGGCCGCCAAAGTGTCTAGACGTTTTAGAGCTAGGCCAACATGAGGATCAC	chr15:66994550-66994569
SMAD6_PROM1	SMAD6_PROM1:5	GCCCGGCGGCTCTTTCTCT	GTGGAAAGGACGAAACACCGGCCCGGCGGCTCTTTCTCTGTTTTAGAGCTAGGCCAACATGAGGATCAC	chr15:66994693-66994712
SMAD6_PROM1	SMAD6_PROM1:8	GCCTGCCTTTCGGATCCTG	GTGGAAAGGACGAAACACCGGCCTGCCTTTCGGATCCTGGTTTTAGAGCTAGGCCAACATGAGGATCAC	chr15:66995098-66995117
TBX5_PROM1	TBX5_PROM1:1	CTCCTAGCAGGGAAGCCGG	GTGGAAAGGACGAAACACCGCTCCTAGCAGGGAAGCCGGGTTTTAGAGCTAGGCCAACATGAGGATCAC	chr12:114843473-114843492
TBX5_PROM1	TBX5_PROM1:3	ATATGGTTGCCGGTGCTCT	GTGGAAAGGACGAAACACCGATATGGTTGCCGGTGCTCTGTTTTAGAGCTAGGCCAACATGAGGATCAC	chr12:114843706-114843725
TBX5_PROM1	TBX5_PROM1:4	TGACTCTTACCTCGAATCC	GTGGAAAGGACGAAACACCGTGACTCTTACCTCGAATCCGTTTTAGAGCTAGGCCAACATGAGGATCAC	chr12:114843831-114843850
TBX5_PROM1	TBX5_PROM1:5	GAGGGCGACAGAGTGCAGT	GTGGAAAGGACGAAACACCGGAGGGCGACAGAGTGCAGTGTTTTAGAGCTAGGCCAACATGAGGATCAC	chr12:114843974-114843993
TBX5_PROM1	TBX5_PROM1:6	AAATCATTTCAAACGCGGT	GTGGAAAGGACGAAACACCGAAATCATTTCAAACGCGGTGTTTTAGAGCTAGGCCAACATGAGGATCAC	chr12:114844186-114844205
TBX5_PROM1	TBX5_PROM1:7	CGGTGCAGAGAACCGAGTC	GTGGAAAGGACGAAACACCGCGGTGCAGAGAACCGAGTCGTTTTAGAGCTAGGCCAACATGAGGATCAC	chr12:114844241-114844260
TBX5_PROM1	TBX5_PROM1:8	AAGGCGAGCGCCGGCCAGG	GTGGAAAGGACGAAACACCGAAGGCGAGCGCCGGCCAGGGTTTTAGAGCTAGGCCAACATGAGGATCAC	chr12:114844353-114844372
TBX5_PROM2	TBX5_PROM2:1	ATTCAGCAAGACTAAGACG	GTGGAAAGGACGAAACACCGATTCAGCAAGACTAAGACGGTTTTAGAGCTAGGCCAACATGAGGATCAC	chr12:114845525-114845544
TBX5_PROM2	TBX5_PROM2:2	CTTTTGCGCTCCAAAGAAG	GTGGAAAGGACGAAACACCGCTTTTGCGCTCCAAAGAAGGTTTTAGAGCTAGGCCAACATGAGGATCAC	chr12:114845635-114845654
TBX5_PROM2	TBX5_PROM2:3	GCACGTACCTCCCAGCTCA	GTGGAAAGGACGAAACACCGGCACGTACCTCCCAGCTCAGTTTTAGAGCTAGGCCAACATGAGGATCAC	chr12:114845761-114845780
TBX5_PROM2	TBX5_PROM2:4	GTCCTATAGGTGCAGCGGC	GTGGAAAGGACGAAACACCGGTCCTATAGGTGCAGCGGCGTTTTAGAGCTAGGCCAACATGAGGATCAC	chr12:114845881-114845900
TBX5_PROM2	TBX5_PROM2:5	CCACAGGTTCCGGACGTCT	GTGGAAAGGACGAAACACCGCCACAGGTTCCGGACGTCTGTTTTAGAGCTAGGCCAACATGAGGATCAC	chr12:114846014-114846033
TBX5_PROM2	TBX5_PROM2:8	AATAATTACTGGGTTGTCG	GTGGAAAGGACGAAACACCGAATAATTACTGGGTTGTCGGTTTTAGAGCTAGGCCAACATGAGGATCAC	chr12:114846381-114846400
TGFB1_ENH1	TGFB1_ENH1:1	AGCGGGATTCCTAGCTCCC	GTGGAAAGGACGAAACACCGAGCGGGATTCCTAGCTCCCGTTTTAGAGCTAGGCCAACATGAGGATCAC	chr19:41933090-41933109
TGFB1_ENH1	TGFB1_ENH1:2	CCCATGCTTTTTTACCTCT	GTGGAAAGGACGAAACACCGCCCATGCTTTTTTACCTCTGTTTTAGAGCTAGGCCAACATGAGGATCAC	chr19:41933173-41933192
TGFB1_ENH1	TGFB1_ENH1:3	CTGACCTGAGGCCGGCACC	GTGGAAAGGACGAAACACCGCTGACCTGAGGCCGGCACCGTTTTAGAGCTAGGCCAACATGAGGATCAC	chr19:41933215-41933234
TGFB1_ENH1	TGFB1_ENH1:6	AGGAGGCCGACCTGAGAGA	GTGGAAAGGACGAAACACCGAGGAGGCCGACCTGAGAGAGTTTTAGAGCTAGGCCAACATGAGGATCAC	chr19:41933416-41933435
TGFB1_ENH1	TGFB1_ENH1:8	GCCTGGGAGGGGAGAACCA	GTGGAAAGGACGAAACACCGGCCTGGGAGGGGAGAACCAGTTTTAGAGCTAGGCCAACATGAGGATCAC	chr19:41933526-41933545
TGFB1_PROM1	TGFB1_PROM1:1	GCCGGGTCGGCGACTCCCG	GTGGAAAGGACGAAACACCGGCCGGGTCGGCGACTCCCGGTTTTAGAGCTAGGCCAACATGAGGATCAC	chr19:41859336-41859355
TGFB1_PROM1	TGFB1_PROM1:2	CGCTGCCCCGCGAGGAGGC	GTGGAAAGGACGAAACACCGCGCTGCCCCGCGAGGAGGCGTTTTAGAGCTAGGCCAACATGAGGATCAC	chr19:41859460-41859479
TGFB1_PROM1	TGFB1_PROM1:4	GCCGGGGGGGTGCCCCGGA	GTGGAAAGGACGAAACACCGGCCGGGGGGGTGCCCCGGAGTTTTAGAGCTAGGCCAACATGAGGATCAC	chr19:41859707-41859726
TGFB1_PROM1	TGFB1_PROM1:5	GGGGTTTTGAAGCCGCCCC	GTGGAAAGGACGAAACACCGGGGGTTTTGAAGCCGCCCCGTTTTAGAGCTAGGCCAACATGAGGATCAC	chr19:41859848-41859867
TGFB1_PROM1	TGFB1_PROM1:7	AAAGAGGACCAGGCGGAGA	GTGGAAAGGACGAAACACCGAAAGAGGACCAGGCGGAGAGTTTTAGAGCTAGGCCAACATGAGGATCAC	chr19:41860116-41860135
TGFB1_PROM1	TGFB1_PROM1:8	AAGAGGGTCTGTCAACATG	GTGGAAAGGACGAAACACCGAAGAGGGTCTGTCAACATGGTTTTAGAGCTAGGCCAACATGAGGATCAC	chr19:41860227-41860246
TNNT2_ENH2	TNNT2_ENH2:1	GTGTCATCCTTGTCCCTCC	GTGGAAAGGACGAAACACCGGTGTCATCCTTGTCCCTCCGTTTTAGAGCTAGGCCAACATGAGGATCAC	chr1:201395523-201395542
TNNT2_ENH2	TNNT2_ENH2:2	TTACAAGGCTTAGCTCCTC	GTGGAAAGGACGAAACACCGTTACAAGGCTTAGCTCCTCGTTTTAGAGCTAGGCCAACATGAGGATCAC	chr1:201395587-201395606
TNNT2_ENH2	TNNT2_ENH2:3	GGCTGACACCTGTCAGCCC	GTGGAAAGGACGAAACACCGGGCTGACACCTGTCAGCCCGTTTTAGAGCTAGGCCAACATGAGGATCAC	chr1:201395643-201395662
TNNT2_ENH2	TNNT2_ENH2:6	CCCCCTGTTAAGCCCATCG	GTGGAAAGGACGAAACACCGCCCCCTGTTAAGCCCATCGGTTTTAGAGCTAGGCCAACATGAGGATCAC	chr1:201395833-201395852
TNNT2_ENH2	TNNT2_ENH2:7	CTGAGGGGACTAGAGCAGA	GTGGAAAGGACGAAACACCGCTGAGGGGACTAGAGCAGAGTTTTAGAGCTAGGCCAACATGAGGATCAC	chr1:201395907-201395926
TNNT2_ENH3	TNNT2_ENH3:1	ACGGCCTAGGGAGGCGCGG	GTGGAAAGGACGAAACACCGACGGCCTAGGGAGGCGCGGGTTTTAGAGCTAGGCCAACATGAGGATCAC	chr1:201438198-201438217
TNNT2_ENH3	TNNT2_ENH3:2	AGAGAACGGGCGGGCGGTG	GTGGAAAGGACGAAACACCGAGAGAACGGGCGGGCGGTGGTTTTAGAGCTAGGCCAACATGAGGATCAC	chr1:201438223-201438242
TNNT2_ENH3	TNNT2_ENH3:3	CGAGCGGCGGAACATGTAA	GTGGAAAGGACGAAACACCGCGAGCGGCGGAACATGTAAGTTTTAGAGCTAGGCCAACATGAGGATCAC	chr1:201438294-201438313
TNNT2_ENH3	TNNT2_ENH3:4	GCTGGTGCGCGGCGCGGAG	GTGGAAAGGACGAAACACCGGCTGGTGCGCGGCGCGGAGGTTTTAGAGCTAGGCCAACATGAGGATCAC	chr1:201438363-201438382
TNNT2_ENH3	TNNT2_ENH3:5	GAGGGCCGGGACTGAGAGG	GTGGAAAGGACGAAACACCGGAGGGCCGGGACTGAGAGGGTTTTAGAGCTAGGCCAACATGAGGATCAC	chr1:201438455-201438474
TNNT2_ENH3	TNNT2_ENH3:7	CCCCAGGCCTTGAATGAAG	GTGGAAAGGACGAAACACCGCCCCAGGCCTTGAATGAAGGTTTTAGAGCTAGGCCAACATGAGGATCAC	chr1:201438538-201438557
TNNT2_ENH3	TNNT2_ENH3:8	GCAGCGCGCTCTCCAATCG	GTGGAAAGGACGAAACACCGGCAGCGCGCTCTCCAATCGGTTTTAGAGCTAGGCCAACATGAGGATCAC	chr1:201438597-201438616
TNNT2_PROM1	TNNT2_PROM1:1	ATTGCTTGTTCCAGGCCGA	GTGGAAAGGACGAAACACCGATTGCTTGTTCCAGGCCGAGTTTTAGAGCTAGGCCAACATGAGGATCAC	chr1:201346334-201346353
TNNT2_PROM1	TNNT2_PROM1:2	TGCTCTATTGTACCAATCT	GTGGAAAGGACGAAACACCGTGCTCTATTGTACCAATCTGTTTTAGAGCTAGGCCAACATGAGGATCAC	chr1:201346560-201346579
TNNT2_PROM1	TNNT2_PROM1:3	GAGGACAGGTTGCCAGGTC	GTGGAAAGGACGAAACACCGGAGGACAGGTTGCCAGGTCGTTTTAGAGCTAGGCCAACATGAGGATCAC	chr1:201346588-201346607
TNNT2_PROM1	TNNT2_PROM1:4	AGACGCCTCCAGGATCTGT	GTGGAAAGGACGAAACACCGAGACGCCTCCAGGATCTGTGTTTTAGAGCTAGGCCAACATGAGGATCAC	chr1:201346769-201346788
TNNT2_PROM1	TNNT2_PROM1:5	TTTAAGCAGGCATGTGGGC	GTGGAAAGGACGAAACACCGTTTAAGCAGGCATGTGGGCGTTTTAGAGCTAGGCCAACATGAGGATCAC	chr1:201346833-201346852
TNNT2_PROM1	TNNT2_PROM1:6	CACGCCATATAAGCCCATG	GTGGAAAGGACGAAACACCGCACGCCATATAAGCCCATGGTTTTAGAGCTAGGCCAACATGAGGATCAC	chr1:201346991-201347010
TNNT2_PROM1	TNNT2_PROM1:8	CTCCACTTGAACTGATGCT	GTGGAAAGGACGAAACACCGCTCCACTTGAACTGATGCTGTTTTAGAGCTAGGCCAACATGAGGATCAC	chr1:201347243-201347262
ZIC2_PROM1	ZIC2_PROM1:1	CGGTTATTGTTCGGAGCCG	GTGGAAAGGACGAAACACCGCGGTTATTGTTCGGAGCCGGTTTTAGAGCTAGGCCAACATGAGGATCAC	chr13:100633551-100633570
ZIC2_PROM1	ZIC2_PROM1:2	CTCCACCTGACCGCGGCGG	GTGGAAAGGACGAAACACCGCTCCACCTGACCGCGGCGGGTTTTAGAGCTAGGCCAACATGAGGATCAC	chr13:100633670-100633689
ZIC2_PROM1	ZIC2_PROM1:3	GCATTCTACCGGCGCTGCT	GTGGAAAGGACGAAACACCGGCATTCTACCGGCGCTGCTGTTTTAGAGCTAGGCCAACATGAGGATCAC	chr13:100633787-100633806
ZIC2_PROM1	ZIC2_PROM1:4	TATTAAAGGAGCTGCGGCG	GTGGAAAGGACGAAACACCGTATTAAAGGAGCTGCGGCGGTTTTAGAGCTAGGCCAACATGAGGATCAC	chr13:100633994-100634013
ZIC2_PROM1	ZIC2_PROM1:5	GCGTAGCGAAGGCGCGGAG	GTGGAAAGGACGAAACACCGGCGTAGCGAAGGCGCGGAGGTTTTAGAGCTAGGCCAACATGAGGATCAC	chr13:100634101-100634120
ZIC2_PROM1	ZIC2_PROM1:6	GCGCAGGAGAGCGGCTCCC	GTGGAAAGGACGAAACACCGGCGCAGGAGAGCGGCTCCCGTTTTAGAGCTAGGCCAACATGAGGATCAC	chr13:100634164-100634183
ZIC2_PROM1	ZIC2_PROM1:8	GCGGCTGCCGCCGAGATGC	GTGGAAAGGACGAAACACCGGCGGCTGCCGCCGAGATGCGTTTTAGAGCTAGGCCAACATGAGGATCAC	chr13:100634405-100634424

## Sheet: Library_Primers
ID	Usage	Sequence
10X-sgRNA enrichment primer	Amplify sgRNA from 10X cDNA	GTGACTGGAGTTCAGACGTGTGCTCTTCCGATCTTGGAAAGGACGAAACACC
SI-PCR	i5 Adapter for 10X mRNA libraries.	AATGATACGGCGACCACCGAGATCTACACTCTTTCCCTACACGACGCTC
N716	i7 Adapters with partial Read 2	CAAGCAGAAGACGGCATACGAGATTAGCGAGTGTGACTGGAGTTCAGACGTGT
N718	i7 Adapters with partial Read 2	CAAGCAGAAGACGGCATACGAGATGTAGCTCCGTGACTGGAGTTCAGACGTGT
N721	i7 Adapters with partial Read 2	CAAGCAGAAGACGGCATACGAGATGCAGCGTAGTGACTGGAGTTCAGACGTGT
N722	i7 Adapters with partial Read 2	CAAGCAGAAGACGGCATACGAGATCTGCGCATGTGACTGGAGTTCAGACGTGT
N723	i7 Adapters with partial Read 2	CAAGCAGAAGACGGCATACGAGATGAGCGCTAGTGACTGGAGTTCAGACGTGT
N724	i7 Adapters with partial Read 2	CAAGCAGAAGACGGCATACGAGATCGCTCAGTGTGACTGGAGTTCAGACGTGT
N726	i7 Adapters with partial Read 2	CAAGCAGAAGACGGCATACGAGATGTCTTAGGGTGACTGGAGTTCAGACGTGT
N727	i7 Adapters with partial Read 2	CAAGCAGAAGACGGCATACGAGATACTGATCGGTGACTGGAGTTCAGACGTGT
N728	i7 Adapters with partial Read 2	CAAGCAGAAGACGGCATACGAGATTAGCTGCAGTGACTGGAGTTCAGACGTGT
N729	i7 Adapters with partial Read 2	CAAGCAGAAGACGGCATACGAGATGACGTCGAGTGACTGGAGTTCAGACGTGT

## Sheet: qPCR_Primers
Target	FWD	REV
MALAT1	GCTCTGTGGTGTGGGATTGA	GTGGCAAAATGGCGGACTTT
POU5F1A	AGTAGTCCCTTCGCAAGCCC	GCAGATGGTCGTTTGGCTGAAT
TBX5	AGACCTGCCCTGCGATTCG	ACTTTGATTCCCTCCATGCCCTGC
RPLP0	CTGGAGGGTGTCCGCAATGT	AGCAGCCACAAAGGCAGATGGA
FN1	ACAACACCGAGGTGACTGAGAC	GGACACAACGATGCTTCCTGAG
